# Supplementary material for: Comparative Transcriptomic Analysis of Key Genes Involved in Citrinin Biosynthesis in Monascus purpureus
Source: MDPI journal article supplement (doi:10.3390/jof9020200), 2023-02-03
Supplement: s1 [file s1]

SI Figures

A

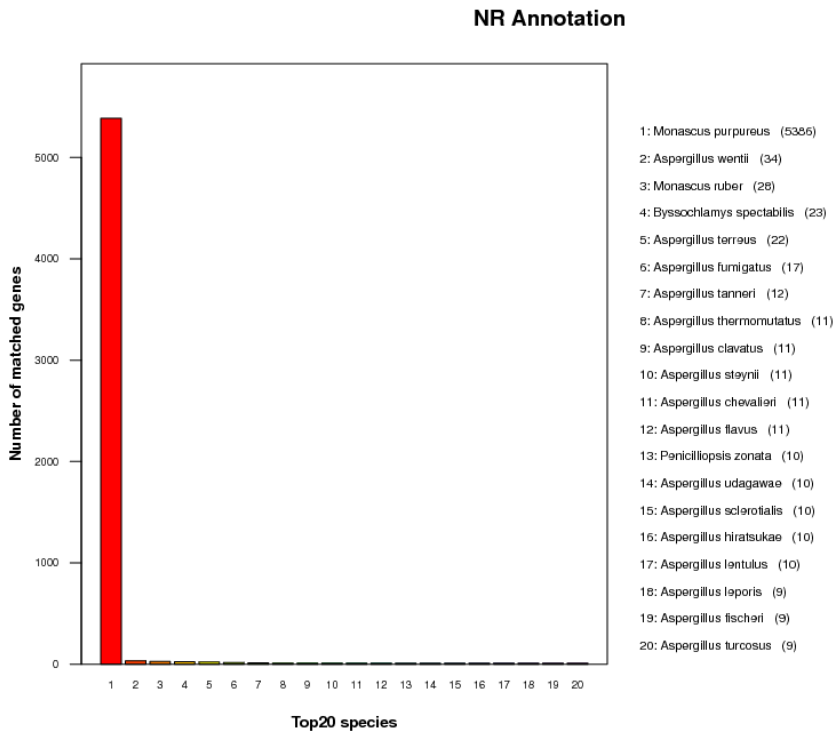

B

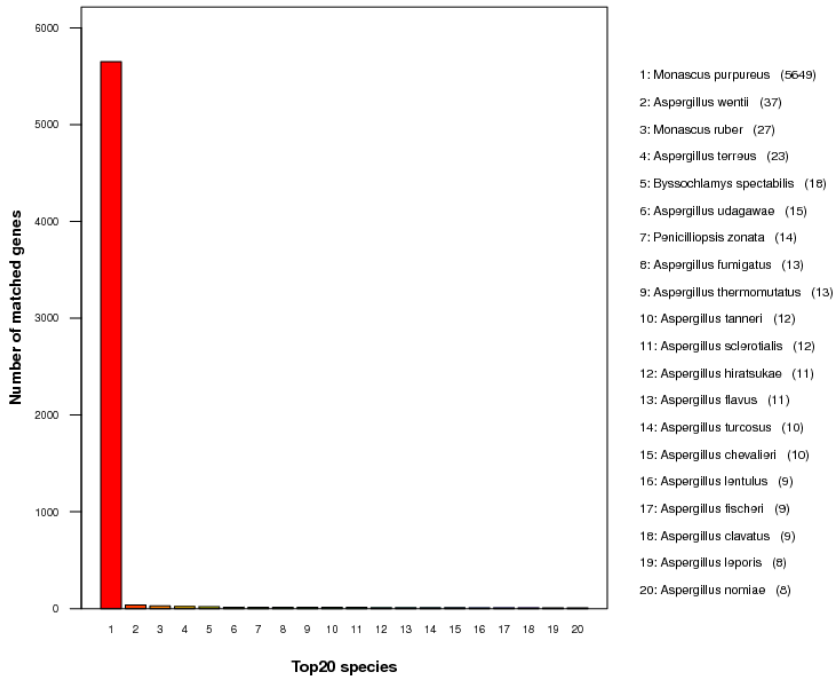

Figure S1. Species annotation statistics from the NR database of (A) M3 and (B) M34.

**A**

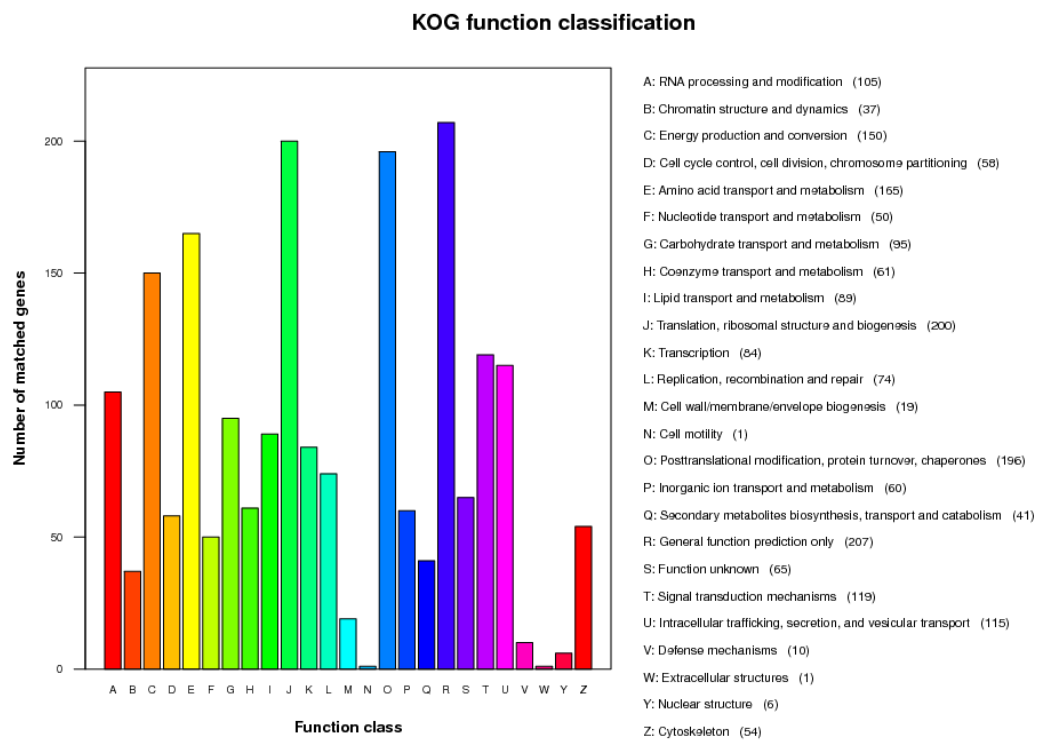

**B**

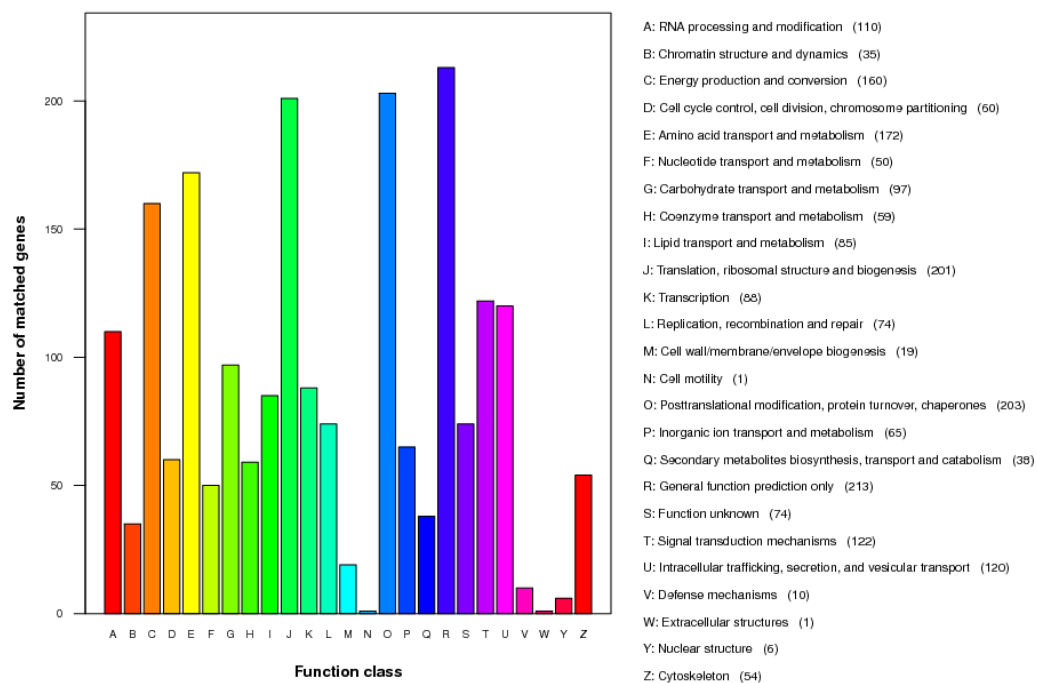

**Figure S2.** Functional classification diagram of KOG in (A) M3 and (B) M34 gene annotations.

**A**

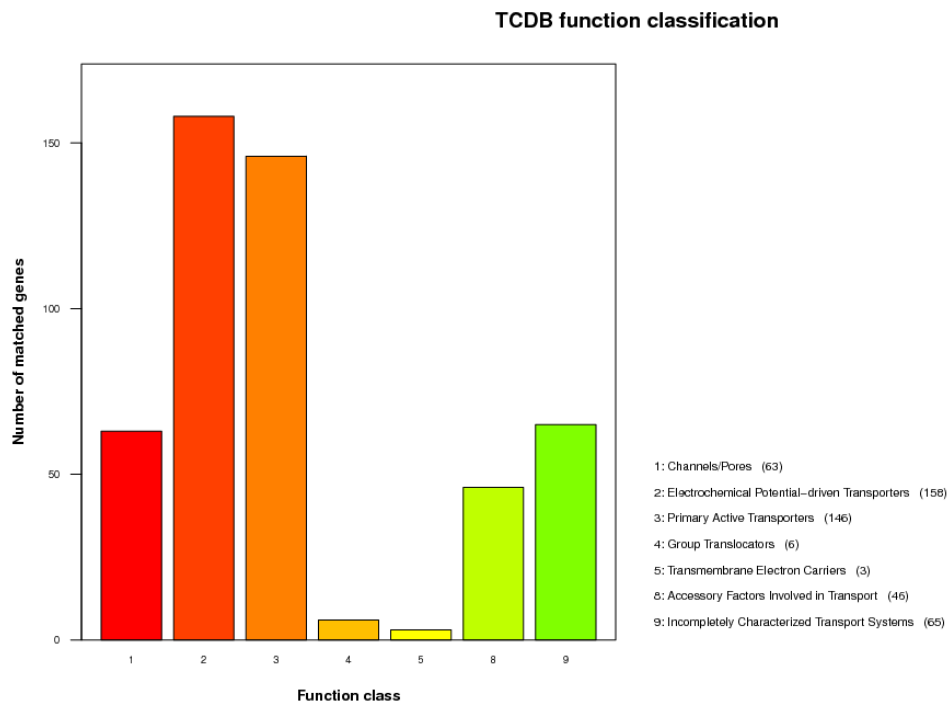

**B**

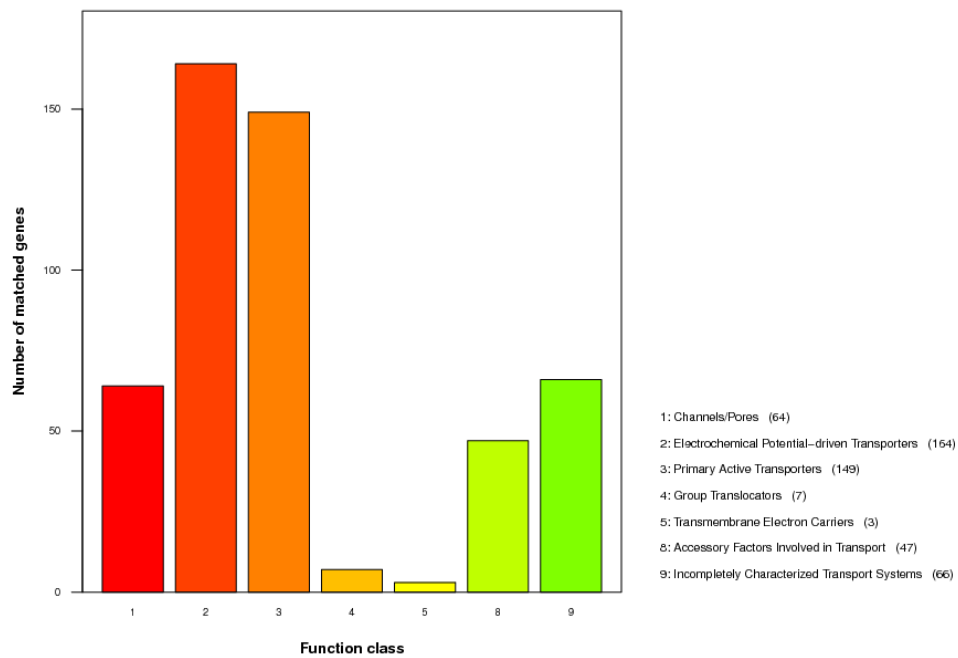

**Figure S3.** Functional classification diagram of TCDB in (A) M3 and (B) M34 gene annotations.

**A**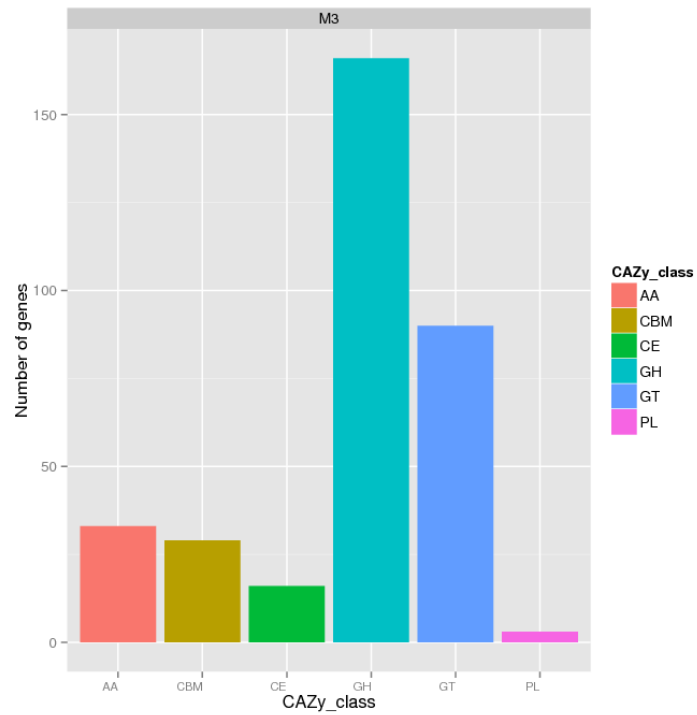**B**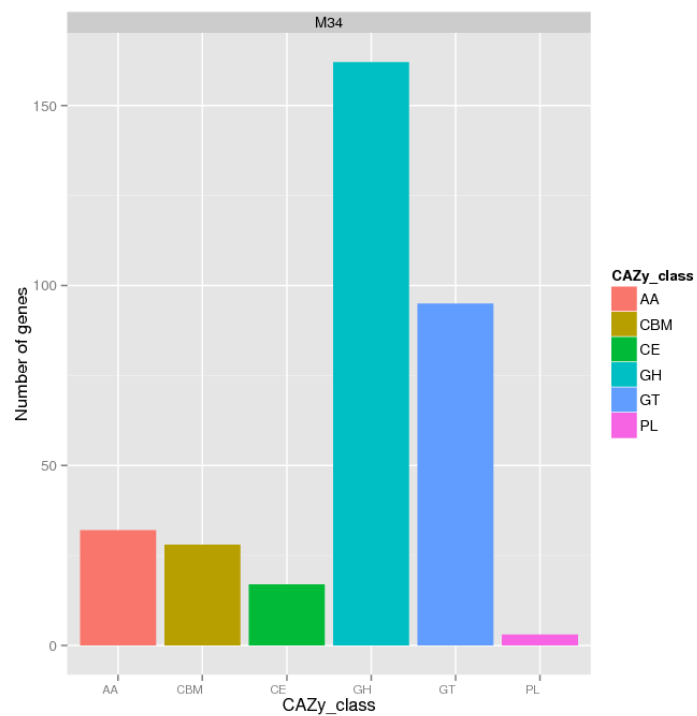

**Figure S4.** Functional classification diagram of CAZy in (A) M3 and (B) M34 gene annotations. AA, auxiliary activity; CBM, carbohydrate related modules; CE, carbohydrate esterase; GH, glycoside hydrolases; GT, glycosyltransferases; PL, polysaccharide lyases.

**A**

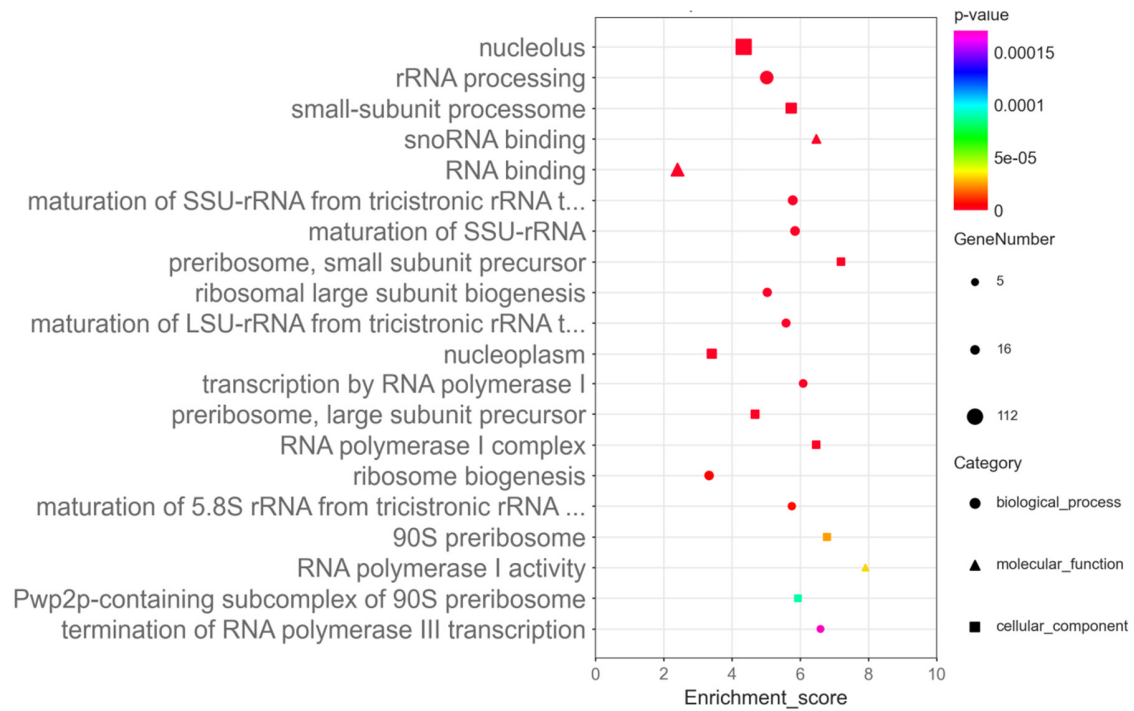

**B**

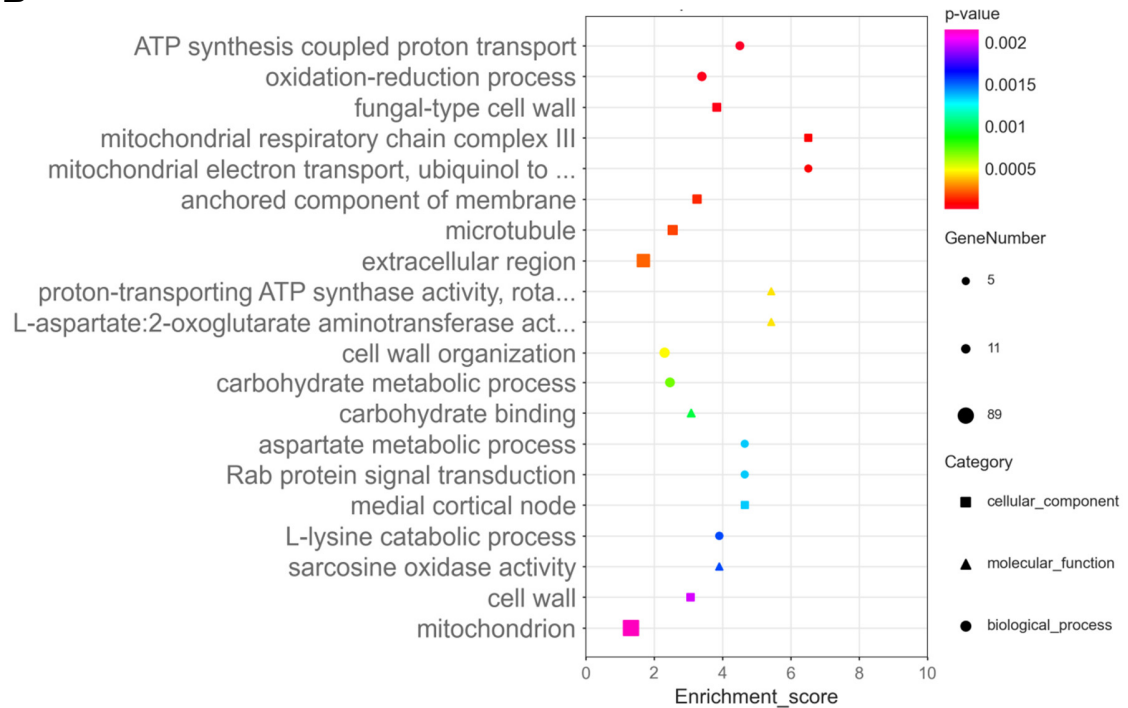

**Figure S5.** Functional classification of DEGs in strains M3 and M34. Scatter plot of the top 20 GO terms enriched in the downregulated (A) and the upregulated (B) DEGs in M34. Color indicates the significance level of enrichment.

**A**

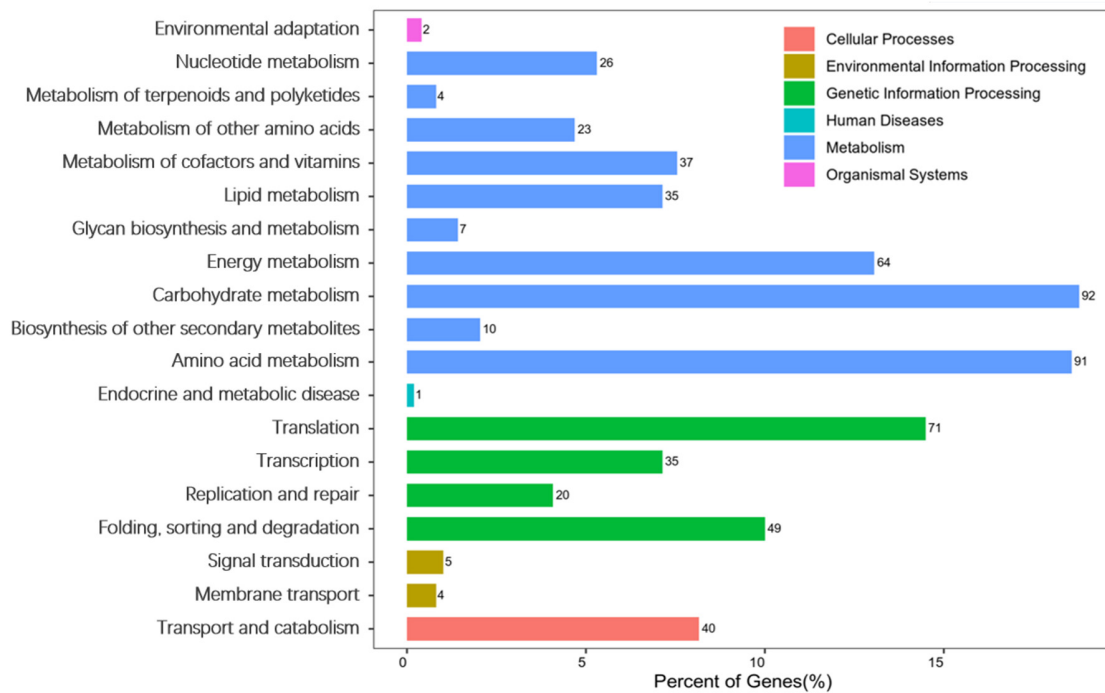

**B**

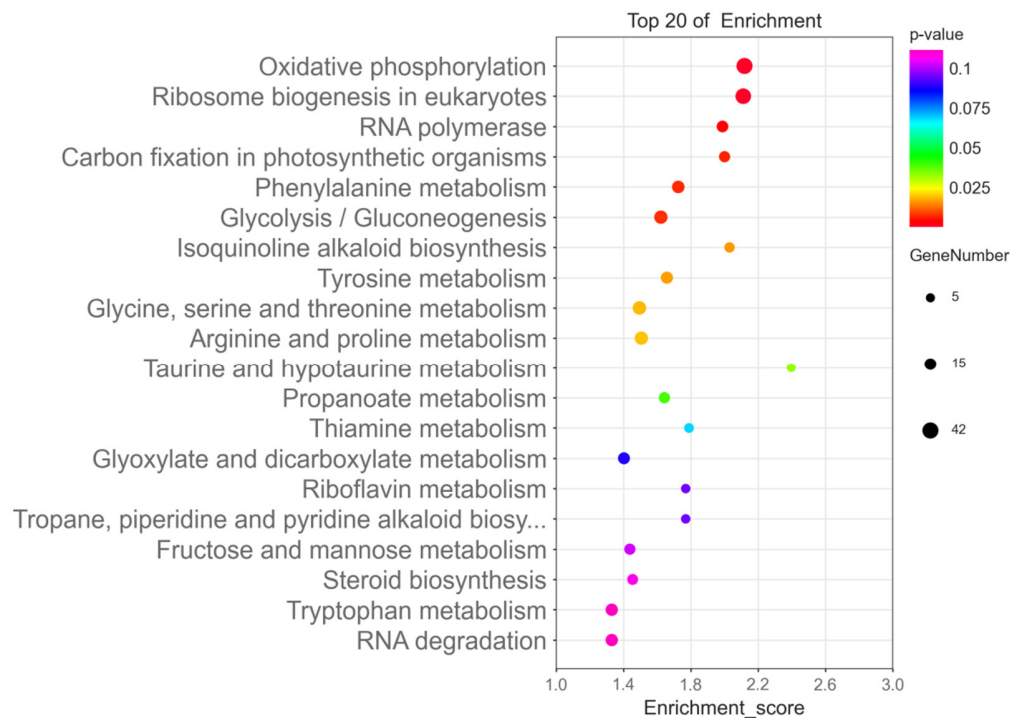

**Figure S6.** KEGG enrichment analysis of DEGs in *M. purpureus* strains M34 vs. M3. (A) KEGG enrichment pathways of DEGs. The Y-axis indicates the categories and subcategories of KEGG pathways, and the X-axis represents the percent of DEGs. (B) The top 20 pathways in the KEGG enrichment analysis of DEGs.

| log2FC | Gene_id   | NR annotation                                         |
|--------|-----------|-------------------------------------------------------|
| -2.31  | gene_5068 | hypothetical protein MPDQ_000611                      |
| -2.27  | gene_6905 | hypothetical protein MPDQ_001107                      |
| -2.11  | gene_8412 | hypothetical protein MPDQ_001407                      |
| -2.06  | gene_1955 | hypothetical protein MPDQ_007923                      |
| -1.89  | gene_5931 | hypothetical protein MPDQ_002360                      |
| -1.85  | gene_2826 | hypothetical protein MPDQ_001231                      |
| -1.85  | gene_7646 | hypothetical protein C8Q69DRAFT_200752                |
| -1.64  | gene_9417 | C6 transcription factor Prf                           |
| -1.55  | gene_4813 | hypothetical protein MPDQ_003590                      |
| -1.54  | gene_6515 | Citrinin biosynthesis transcriptional activator ctnR  |
| -1.50  | gene_6474 | lactose regulatory protein lac9 and GAL4-like protein |
| -1.47  | gene_5378 | hypothetical protein MPDQ_005879                      |
| -1.44  | gene_9797 | hypothetical protein MPDQ_004505                      |
| -1.44  | gene_8163 | hypothetical protein MPDQ_002308                      |
| -1.43  | gene_6420 | hypothetical protein MPDQ_002609                      |
| -1.41  | gene_4114 | hypothetical protein MPDQ_003200                      |
| -1.21  | gene_9761 | hypothetical protein MPDQ_006315                      |
| -1.21  | gene_3806 | hypothetical protein MPDQ_000529                      |
| -1.15  | gene_5633 | hypothetical protein MPDQ_002792                      |
| -1.12  | gene_8286 | Maltose acetyltransferase                             |
| -1.10  | gene_7254 | hypothetical protein MPDQ_006517                      |
| -1.06  | gene_6821 | hypothetical protein MPDQ_002192                      |
| -1.06  | gene_1291 | hypothetical protein MPDQ_004674                      |
| -1.02  | gene_5381 | hypothetical protein MPDQ_005876                      |
| 1.07   | gene_7696 | hypothetical protein MPDQ_004428                      |
| 1.15   | gene_4499 | hypothetical protein MPDQ_003340                      |
| 1.21   | gene_5192 | hypothetical protein MPDQ_001872                      |
| 1.22   | gene_5910 | hypothetical protein MPDQ_002536                      |
| 1.26   | gene_34   | hypothetical protein MPDQ_003611                      |
| 1.27   | gene_3443 | hypothetical protein MPDQ_003532                      |
| 1.31   | gene_279  | hypothetical protein MPDQ_001437                      |
| 1.34   | gene_4821 | hypothetical protein MPDQ_006775                      |
| 1.39   | gene_1768 | hypothetical protein MPDQ_003432                      |
| 1.46   | gene_8318 | hypothetical protein MPDQ_004191                      |
| 1.53   | gene_7123 | hypothetical protein MPDQ_001327                      |
| 1.54   | gene_3339 | hypothetical protein PENDEC_c010G05275                |
| 1.66   | gene_1606 | hypothetical protein ASPWEDRAFT_266719                |
| 1.76   | gene_6863 | hypothetical protein MPDQ_007795                      |
| 1.77   | gene_4483 | hypothetical protein MPDQ_002920                      |
| 1.85   | gene_7681 | hypothetical protein MPDQ_002394                      |
| 2.63   | gene_1900 | hypothetical protein MPDQ_007360                      |
| 3.90   | gene_8030 | hypothetical protein MPDQ_000984                      |

**Figure S7.** Expression fold changes (log<sub>2</sub>FC) of selected DEGs that encode Fungal Zn(2)-Cys(6) binuclear cluster domain proteins.
