# Supplementary material for: Comparative Transcriptomic Analysis of Key Genes Involved in Citrinin Biosynthesis in Monascus purpureus
Source: J Fungi (Basel). 2023 Feb 3;9(2):200. doi: 10.3390/jof9020200 (PMC9965497; doi:10.3390/jof9020200)
Supplement: Supplementary file 1 [file jof-09-00200-s001.zip › jof-2150824-supplementary/Supplementary Tables.xlsx]

## Sheet: Table S1.
Table S1. qRT-PCR primers used in this study.
Names	Sequences (5′→3′)
RT-GAPDH-F	CGATGCCCAGTAATTATTAGGAC
RT-GAPDH-R	CTGTAGCGCCTGACCTCGTA
RT-mpl7-F	CCGATGCTTCAGACGGAATA
RT-mpl7-R	TTCTAGCTGACACGGCGTA
RT-mpl6-F	CAACCTCAAGGGCACGTA
RT-mpl6-R	GCCGATGGAGTTCATATTGACA
RT-mpl5-F	GATCTGCATTCTACAAGGAGG
RT-mpl5-R	TTCGAAGGTTTGAAGCTTGTG
RT-mpl4-F	AGGCCGGAAATCTCGACA
RT-mpl4-R	GGAGATAGAGTGACCGCT
RT-mpl3-F	CCTCTCTCATCTTCACCGTC
RT-mpl3-R	AGCAGTATGTTGTCATAAGCC
RT-mpl2-F	GGAGTCCTCCCAGACCTAA
RT-mpl2-R	TGTCCCATGAAGAACCGC
RT-mpl1-F	TGACTGTCTGGAGGATGTGAA
RT-mpl1-R	GCCTTGACTAAATCCAAGCAAT
RT-pksCT-F	AGGCATGGATAGATAGCGGA
RT-pksCT-R	GCATTGGAGACACATAGAGC
RT-mpr1-F	TGGATGTCCCTCTGGGTGA
RT-mpr1-R	GGTCGAGACGTGGAACTT
RT-mpr2-F	GTTACGGCTCTCGGGTCTTA
RT-mpr2-R	GTGTGGCTCCAGTGACAA
RT-laeA-F	CCCTTGCCAACGAGATTTC
RT-laeA-R	ACTTGCAGTCCTCTTCAAAAC

## Sheet: Table S2.
Table S2. ITS taxonomic characterization of Monascus strains
Strain No.	Sequencing length (bp)	Characterization of Monascus strains
		Species	Score	Identify （%）
M1	587	Monascus purpureus	741	0.9407
M2	544	Monascus ruber	913	0.9775
M3	585	Monascus purpureus	1051	0.9915
M4	584	Monascus purpureus	1050	0.9915
M5	583	Monascus ruber	1074	1
M6	584	Monascus ruber	1068	0.9983
M7	583	Monascus gaoliang	1070	0.9983
M8	584	Monascus purpureus	1061	0.9966
M9	547	Monascus purpureus	1011	1
M12	534	Monascus purpureus	972	0.9944
M15	583	Monascus purpureus	1068	0.9983
M23	957	Monascus purpureus	1068	0.9983
M25	582	Monascus purpureus	1074	1
M27	550	Monascus purpureus	1016	1
M34	579	Monascus purpureus	1070	1
M37	540	Monascus purpureus	987	0.9981
M41	581	Monascus purpureus	1050	0.9931
M69	529	Monascus purpureus	905	0.998

## Sheet: Table S3
Table S3. The genes in the CIT and MPs biosynthetic gene clusters from M3 and M34, compared to the reference genome Monpu1, respectively. * https://mycocosm.jgi.doe.gov/Monru1/Monru1.home.html
Name	Monpu1 *	Identity (%)	e-value	M3	Identity (%)	e-value	M34	Identity (%)	e-value	Nr annotation
	jgi|Monpu1|444616|e_gw1.83.76.1	89.3	6.4e-282	A4457	100	0	A3487	100	0	hypothetical protein MPDQ_003576
CtnDup1	jgi|Monpu1|444651|e_gw1.83.30.1	100	2.3e-267	A4458	100	3e-267	A3486	100	3e-267	CtnDup1
mpl7/citC	jgi|Monpu1|444643|e_gw1.83.11.1	100	0	A4459	100	0	A3485	100	0	Dehydrogenase
mpl6/citE	jgi|Monpu1|500909|fgenesh1_kg.83_#_41_#_Locus6854v9rpkm0.42_PRE	97.3	9e-153	-			-			Short chain dehydrogenase
mpl5	jgi|Monpu1|491374|fgenesh1_pg.83_#_28	100	3.6e-69	A4460	100	3.6e-69	A3484	96.3	4.6e-67	glyoxalase-like domain
mpl4/citD	jgi|Monpu1|444619|e_gw1.83.22.1	100	2.3e-289	A4461	100	5.2e-289	A3483	100	5.2e-289	Aldehyde dehydrogenase
mpl3/ctnR	jgi|Monpu1|444645|e_gw1.83.97.1	100	0	A4462	88.3	6.2e-145	A3482	100	3.7e-223	Transcriptional activator
mpl2/citB	jgi|Monpu1|500903|fgenesh1_kg.83_#_35_#_Locus6854v7rpkm0.45	100	3.5e-193	A4463	100	7.8e-193	A3481	99.7	2.3e-192	2-oxoglutarate-dependent dioxygenase
mpl1/citA	jgi|Monpu1|444669|e_gw1.83.57.1	100	2.9e-181	A4464	100	2.9e-181	A3480	100	2.9e-181	Esterase
pksCT/citS	jgi|Monpu1|509802|gm1.5276_g	100	0	A4465	100	0	A3479	100	0	Citrinin Non-reducing polyketide synthase
mpr1/ctnC	jgi|Monpu1|500898|fgenesh1_kg.83_#_30_#_Locus14370v2rpkm0.00_PRE	100	3.8e-284	A4466	96	4.1e-267	A3478	100	6.5e-284	Citrinin biosynthesis cluster MFS transporter
mpr2/ctnF	jgi|Monpu1|500896|fgenesh1_kg.83_#_28_#_Locus2772v1rpkm40.43	100	9.9e-157	A4467	100	2.2e-156	A3477	98.5	2.5e-152	histidine phosphatase
mpr3	jgi|Monpu1|444656|e_gw1.83.56.1	87.4	4e-232	A4468	100	2e-269	A3476	100	2e-269	unknown protein
mpr4/ctnR1	jgi|Monpu1|444591|e_gw1.83.83.1	100	0	A4469	100	0	A3475	99.9	0	WD40 protein
mpr5/ctnG	jgi|Monpu1|523959|fgenesh1_pm.83_#_17	99.8	0	A4470	100	2.2e-122	A3474	100	2.2e-122	carbonic anhydrases
ctnH	jgi|Monpu1|500890|fgenesh1_kg.83_#_22_#_Locus1829v1rpkm73.22	93.1	2.1e-168	A4472	100	1.7e-184	A3472	93.1	2.8e-168	Short chain dehydrogenase
ctnI	jgi|Monpu1|523957|fgenesh1_pm.83_#_15	100	2.8e-128	A4473	100	0	A3471	100	0	Acetyl-CoA synthetase-like protein
MpigP	jgi|Monpu1|433430|e_gw1.1.41.1	100	0	A5720	100	0	A5110	99.282	0	putative MFS multidrug transporter
MpigO	jgi|Monpu1|494219|fgenesh1_kg.1_#_143_#_Locus11385v2rpkm0.86	100	4.5e-263	A5721	100	0	A5109	100	0	decarboxylase
MpigN	jgi|Monpu1|512710|estExt_Genemark1.C_10102	100	1.2e-244	A5722+A5723	100	0	A5107+A5108	100	0	monooxygenase
MpigM	jgi|Monpu1|494221|fgenesh1_kg.1_#_145_#_Locus5005v1rpkm12.62	100	3.7e-262	A5724	100	0	A5106	100	0	acyltransferase
MpigL	jgi|Monpu1|520204|fgenesh1_pm.1_#_76	71.1	2.4e-285	-			-			hypothetical protein MPDQ_000932
MpigK	jgi|Monpu1|451905|estExt_Genewise1.C_10191	100	0	A5725	100	0	A5105	100	0	FAS subunit beta
MpigJ	jgi|Monpu1|486310|fgenesh1_pg.1_#_111	98.9	0	A5726	100	1.07e-64	A5104	100	0	FAS subunit alpha
MpigI	jgi|Monpu1|486311|fgenesh1_pg.1_#_112	100	0	A5727	99.6	0	A5103	98.8	0	MpigI
MpigH	jgi|Monpu1|520208|fgenesh1_pm.1_#_80	100	3.4e-205	A5728	100	3.4e-205	A5102	100	3.4e-205	MpigH
MpigG	jgi|Monpu1|486313|fgenesh1_pg.1_#_114	100	1.1e-155	A5729	100	2.4e-155	A5101	100	2.4e-155	MpigG
MpigF	jgi|Monpu1|4856|CE4855_5133	100	7.2e-261	A5730	100	1.2e-260	A5100	100	1.2e-260	MpigF
MpigE	jgi|Monpu1|520211|fgenesh1_pm.1_#_83	100	3.9e-203	A5731	100	5e-203	A5099	100	5e-203	putative oxidoreductase
MpigD	jgi|Monpu1|433478|e_gw1.1.27.1	100	1.1e-258	A5732	100	1.1e-258	A5098	100	1.1e-258	3-O-acetyltransferase
MpigC	jgi|Monpu1|504640|gm1.114_g	100	4.2e-169	A5733	100	5.5e-169	A5097	100	5.5e-169	C-11-ketoreductase
MpigB	jgi|Monpu1|504641|gm1.115_g	99.8	0	A5734	97.4	1.8e-278	A5096	100	8.3e-284	transcription factor
MpigA	jgi|Monpu1|512724|estExt_Genemark1.C_10116	100	0	A5735	99	0	A5095	100	0	NR-PKS

## Sheet: Table S4.
Table S4. Quality evaluation of the transcriptome data
Sample	Raw Reads (M)	Clean Reads (M)	Clean Bases (Gb)	Q30 (%)	GC (%)	Total reads	Total mapped reads
M3-1	50.37	49.55	7.25	95.38	52.8	49548240	48,161,150(97.20%)
M3-2	50.7	49.88	7.29	95.3	52.64	49880770	46,557,256(93.34%)
M3-3	48.57	47.64	6.85	95.01	51.98	47642764	43,935,394(92.22%)
M34-1	48.41	47.37	6.88	94.32	53.12	47369012	46,309,824(97.76%)
M34-2	51.36	50.28	7.27	94.62	53.21	50281934	49,054,361(97.56%)
M34-3	47.26	46.29	6.73	94.62	52.99	46292472	44,030,843(95.11%)

## Sheet: Table S5.
Table S5. Genome based SNPs analysis in M3.
Type	Affected ID	Affected ID	ContigID	Start	End	Ref	Alt	Heterozygous/homozygous SNPs	QualityValue
exonic	gene_8	gm1.5_g	scaffold_1	23077	23077	G	A	hom	30
downstream	gene_10	gm1.7_g	scaffold_1	31611	31611	T	A	hom	30
downstream	gene_11,gene_12	e_gw1.1.137.1,fgenesh1_pm.1_#_6	scaffold_1	36143	36143	T	A	hom	30
upstream	gene_15	MIX27_328_23	scaffold_1	41999	41999	T	G	hom	30
exonic	gene_20	estExt_Genemark1.C_10014	scaffold_1	58680	58680	C	T	hom	30
downstream	gene_21	fgenesh1_pm.1_#_13	scaffold_1	63609	63609	A	G	hom	30
intronic	gene_23	fgenesh1_kg.1_#_24_#_Locus1678v1rpkm83.43	scaffold_1	70078	70078	T	A	hom	30
downstream	gene_32	estExt_Genewise1Plus.C_10046	scaffold_1	87804	87804	T	C	hom	30
UTR3	gene_35	estExt_fgenesh1_pg.C_10029	scaffold_1	95654	95654	A	G	hom	30
exonic	gene_42	fgenesh1_kg.1_#_42_#_Locus1768v1rpkm76.96	scaffold_1	109801	109801	C	T	hom	30
exonic	gene_48	e_gw1.1.60.1	scaffold_1	130531	130531	G	A	hom	30
exonic	gene_48	e_gw1.1.60.1	scaffold_1	131125	131125	C	T	hom	30
upstream	gene_48,gene_49	CE1800_26,e_gw1.1.60.1	scaffold_1	133357	133357	C	T	hom	30
upstream	gene_48,gene_49	CE1800_26,e_gw1.1.60.1	scaffold_1	133365	133365	C	T	hom	30
upstream;downstream	gene_49;gene_50	CE1800_26;estExt_fgenesh1_pg.C_10041	scaffold_1	134065	134065	T	C	hom	30
upstream;downstream	gene_49;gene_50	CE1800_26;estExt_fgenesh1_pg.C_10041	scaffold_1	134066	134066	T	A	hom	30
upstream;downstream	gene_49;gene_50	CE1800_26;estExt_fgenesh1_pg.C_10041	scaffold_1	134073	134073	G	A	hom	30
upstream;downstream	gene_49;gene_50	CE1800_26;estExt_fgenesh1_pg.C_10041	scaffold_1	134080	134080	G	A	hom	30
upstream;downstream	gene_49;gene_50	CE1800_26;estExt_fgenesh1_pg.C_10041	scaffold_1	134108	134108	A	G	hom	30
upstream;downstream	gene_49;gene_50	CE1800_26;estExt_fgenesh1_pg.C_10041	scaffold_1	134123	134123	A	G	hom	30
upstream;downstream	gene_49;gene_50	CE1800_26;estExt_fgenesh1_pg.C_10041	scaffold_1	134143	134143	A	C	hom	30
upstream;downstream	gene_49;gene_50	CE1800_26;estExt_fgenesh1_pg.C_10041	scaffold_1	134146	134146	T	C	hom	30
upstream;downstream	gene_49;gene_50	CE1800_26;estExt_fgenesh1_pg.C_10041	scaffold_1	134176	134176	T	A	hom	30
exonic	gene_58	estExt_Genewise1Plus.C_10078	scaffold_1	153495	153495	A	T	hom	30
exonic	gene_58	estExt_Genewise1Plus.C_10078	scaffold_1	153496	153496	T	G	hom	30
exonic	gene_62	fgenesh1_kg.1_#_70_#_Locus3422v1rpkm28.99	scaffold_1	167495	167495	A	G	hom	30
exonic	gene_67	fgenesh1_kg.1_#_74_#_Locus6931v1rpkm4.39	scaffold_1	177681	177681	T	C	hom	30
intronic	gene_71	fgenesh1_pm.1_#_42	scaffold_1	186074	186074	A	C	hom	30
intergenic	gene_77(dist=1677),gene_78(dist=1686)	CE2607_9143(dist=1677),estExt_Genewise1Plus.C_10118(dist=1686)	scaffold_1	200921	200921	C	T	hom	30
intergenic	gene_77(dist=1683),gene_78(dist=1680)	CE2607_9143(dist=1683),estExt_Genewise1Plus.C_10118(dist=1680)	scaffold_1	200927	200927	C	A	hom	30
exonic	gene_78	estExt_Genewise1Plus.C_10118	scaffold_1	204178	204178	G	A	hom	30
intronic	gene_79	e_gw1.1.240.1	scaffold_1	206281	206281	T	G	hom	30
exonic	gene_82	estExt_fgenesh1_pm.C_10047	scaffold_1	210941	210941	G	A	hom	30
upstream	gene_82,gene_83	estExt_fgenesh1_pm.C_10047,fgenesh1_kg.1_#_92_#_Locus1958v1rpkm67.20	scaffold_1	213113	213113	T	C	hom	30
exonic	gene_85	gm1.63_g	scaffold_1	219151	219151	T	C	hom	30
downstream	gene_102	CE4093_8471	scaffold_1	264222	264222	C	A	hom	30
UTR3	gene_110	fgenesh1_kg.1_#_122_#_Locus3010v1rpkm35.71	scaffold_1	278141	278141	T	C	hom	30
exonic	gene_114	fgenesh1_kg.1_#_128_#_Locus6045v1rpkm7.20	scaffold_1	289129	289129	A	G	hom	30
exonic	gene_116	CE4321_1470	scaffold_1	294332	294332	C	T	hom	30
exonic	gene_124	fgenesh1_kg.1_#_136_#_Locus7635v1rpkm3.12	scaffold_1	308042	308042	C	T	hom	30
downstream	gene_129	fgenesh1_kg.1_#_145_#_Locus5005v1rpkm12.62	scaffold_1	322015	322015	T	A	hom	30
UTR5	gene_131	fgenesh1_kg.1_#_148_#_Locus5180v3rpkm0.47_PRE	scaffold_1	327194	327194	G	A	hom	30
exonic	gene_140	gm1.114_g	scaffold_1	351367	351367	T	C	hom	30
exonic	gene_141	gm1.115_g	scaffold_1	352990	352990	T	C	hom	30
exonic	gene_141	gm1.115_g	scaffold_1	353255	353255	A	G	hom	30
exonic	gene_141	gm1.115_g	scaffold_1	353748	353748	C	T	hom	30
upstream	gene_141	gm1.115_g	scaffold_1	354536	354536	T	C	hom	30
exonic	gene_143	estExt_Genemark1.C_10116	scaffold_1	357147	357147	A	C	hom	30
UTR3	gene_151	fgenesh1_kg.1_#_167_#_Locus3151v1rpkm33.20	scaffold_1	378242	378242	G	A	hom	30
intronic	gene_151	fgenesh1_kg.1_#_167_#_Locus3151v1rpkm33.20	scaffold_1	379916	379916	G	A	hom	30
downstream	gene_1274	estExt_Genewise1.C_100002	scaffold_10	401	401	G	A	hom	30
intergenic	gene_1281(dist=1142),gene_1282(dist=4123)	gm1.1022_g(dist=1142),fgenesh1_kg.10_#_12_#_Locus3040v1rpkm34.94(dist=4123)	scaffold_10	17176	17176	A	T	hom	30
downstream	gene_1283,gene_1284	estExt_Genemark1.C_100008,estExt_fgenesh1_pg.C_100007	scaffold_10	24511	24511	A	T	hom	30
downstream	gene_1283,gene_1284	estExt_Genemark1.C_100008,estExt_fgenesh1_pg.C_100007	scaffold_10	24513	24513	C	G	hom	30
downstream	gene_1283,gene_1284	estExt_Genemark1.C_100008,estExt_fgenesh1_pg.C_100007	scaffold_10	24514	24514	A	T	hom	30
downstream	gene_1283,gene_1284	estExt_Genemark1.C_100008,estExt_fgenesh1_pg.C_100007	scaffold_10	24516	24516	A	T	hom	30
downstream	gene_1283,gene_1284	estExt_Genemark1.C_100008,estExt_fgenesh1_pg.C_100007	scaffold_10	24520	24520	T	G	hom	30
downstream	gene_1283,gene_1284	estExt_Genemark1.C_100008,estExt_fgenesh1_pg.C_100007	scaffold_10	24521	24521	C	A	hom	30
downstream	gene_1283,gene_1284	estExt_Genemark1.C_100008,estExt_fgenesh1_pg.C_100007	scaffold_10	24531	24531	A	T	hom	30
downstream	gene_1283,gene_1284	estExt_Genemark1.C_100008,estExt_fgenesh1_pg.C_100007	scaffold_10	24538	24538	T	A	hom	30
downstream	gene_1283,gene_1284	estExt_Genemark1.C_100008,estExt_fgenesh1_pg.C_100007	scaffold_10	24539	24539	G	C	hom	30
downstream	gene_1283,gene_1284	estExt_Genemark1.C_100008,estExt_fgenesh1_pg.C_100007	scaffold_10	24541	24541	C	A	hom	30
exonic	gene_1299	estExt_Genemark1.C_100022	scaffold_10	58423	58423	C	A	hom	30
intronic	gene_1307	gm1.1044_g	scaffold_10	77224	77224	T	C	hom	30
intronic	gene_1307	gm1.1044_g	scaffold_10	77261	77261	T	C	hom	30
exonic	gene_1319	fgenesh1_kg.10_#_49_#_Locus5036v1rpkm12.44	scaffold_10	106374	106374	C	T	hom	30
exonic	gene_1366	fgenesh1_kg.10_#_86_#_Locus1549v1rpkm91.47	scaffold_10	216270	216270	C	T	hom	30
exonic	gene_1372	fgenesh1_kg.10_#_94_#_Locus2990v1rpkm35.95	scaffold_10	228317	228317	T	G	hom	30
upstream	gene_1384,gene_1385	fgenesh1_kg.10_#_109_#_Locus5901v1rpkm7.76,fgenesh1_kg.10_#_110_#_Locus1617v1rpkm87.26	scaffold_10	262944	262944	T	C	hom	30
UTR3	gene_1386	estExt_fgenesh1_pg.C_100096	scaffold_10	269335	269335	A	C	hom	30
downstream	gene_1387	fgenesh1_kg.10_#_113_#_Locus1490v1rpkm96.71	scaffold_10	271550	271550	C	T	hom	30
downstream	gene_1387	fgenesh1_kg.10_#_113_#_Locus1490v1rpkm96.71	scaffold_10	271552	271552	G	T	hom	30
downstream	gene_1387	fgenesh1_kg.10_#_113_#_Locus1490v1rpkm96.71	scaffold_10	271555	271555	T	A	hom	30
downstream	gene_1387	fgenesh1_kg.10_#_113_#_Locus1490v1rpkm96.71	scaffold_10	271557	271557	C	A	hom	30
downstream	gene_1387	fgenesh1_kg.10_#_113_#_Locus1490v1rpkm96.71	scaffold_10	271559	271559	C	A	hom	30
downstream	gene_1387	fgenesh1_kg.10_#_113_#_Locus1490v1rpkm96.71	scaffold_10	271561	271561	C	A	hom	30
downstream	gene_1387	fgenesh1_kg.10_#_113_#_Locus1490v1rpkm96.71	scaffold_10	271563	271563	T	A	hom	30
downstream	gene_1387	fgenesh1_kg.10_#_113_#_Locus1490v1rpkm96.71	scaffold_10	271564	271564	C	A	hom	30
intergenic	NONE(dist=NONE),gene_7150(dist=2602)	NONE(dist=NONE),fgenesh1_kg.100_#_1_#_Locus3033v2rpkm24.55(dist=2602)	scaffold_100	2133	2133	C	A	hom	30
upstream	gene_7159	fgenesh1_kg.100_#_9_#_Locus9724v1rpkm1.56	scaffold_100	22954	22954	C	T	hom	30
upstream	gene_7159	fgenesh1_kg.100_#_9_#_Locus9724v1rpkm1.56	scaffold_100	23428	23428	C	T	hom	30
upstream	gene_7159	fgenesh1_kg.100_#_9_#_Locus9724v1rpkm1.56	scaffold_100	23501	23501	A	G	hom	30
upstream	gene_7159	fgenesh1_kg.100_#_9_#_Locus9724v1rpkm1.56	scaffold_100	23502	23502	C	T	hom	30
upstream;downstream	gene_7161;gene_7160	fgenesh1_kg.100_#_11_#_Locus2357v1rpkm50.92;CE13229_2795	scaffold_100	23955	23955	G	T	hom	30
UTR3	gene_7163	fgenesh1_kg.100_#_13_#_Locus2640v1rpkm43.50	scaffold_100	29510	29510	C	T	hom	30
UTR3	gene_7173	CE13873_27815	scaffold_100	47879	47879	T	A	hom	30
exonic	gene_7182	fgenesh1_kg.100_#_36_#_Locus1193v2rpkm36.70,gm1.5812_g	scaffold_100	75633	75633	C	T	hom	30
UTR3	gene_7185	fgenesh1_kg.101_#_1_#_Locus1689v1rpkm82.74	scaffold_101	2307	2307	T	C	hom	30
exonic	gene_7189	fgenesh1_pg.101_#_5	scaffold_101	8171	8171	G	A	hom	30
upstream	gene_7195	fgenesh1_pm.101_#_9	scaffold_101	18704	18704	G	A	hom	30
exonic	gene_7200	estExt_Genewise1Plus.C_1010036	scaffold_101	31086	31086	G	A	hom	30
downstream	gene_7216	fgenesh1_kg.101_#_29_#_Locus4401v1rpkm17.97	scaffold_101	58841	58841	C	T	hom	30
downstream	gene_7216	fgenesh1_kg.101_#_29_#_Locus4401v1rpkm17.97	scaffold_101	59058	59058	A	G	hom	30
downstream	gene_7216	fgenesh1_kg.101_#_29_#_Locus4401v1rpkm17.97	scaffold_101	59150	59150	C	T	hom	30
downstream	gene_7216	fgenesh1_kg.101_#_29_#_Locus4401v1rpkm17.97	scaffold_101	59234	59234	C	T	hom	30
downstream	gene_7216	fgenesh1_kg.101_#_29_#_Locus4401v1rpkm17.97	scaffold_101	59267	59267	C	T	hom	30
downstream	gene_7216	fgenesh1_kg.101_#_29_#_Locus4401v1rpkm17.97	scaffold_101	59268	59268	A	G	hom	30
exonic	gene_7217	estExt_Genewise1Plus.C_1010063	scaffold_101	64098	64098	G	A	hom	30
exonic	gene_7239	e_gw1.102.49.1	scaffold_102	23170	23170	C	T	hom	30
splicing	gene_7259(mRNA_7259:exon5:c.589-2A>G)	estExt_fgenesh1_pm.C_1020025(estExt_fgenesh1_pm.C_1020025:exon5:c.675-2A>G)	scaffold_102	64360	64360	A	G	hom	30
exonic	gene_7260	gm1.5871_g	scaffold_102	65297	65297	C	T	hom	30
exonic	gene_7279	CE17297_12751	scaffold_103	23909	23909	G	T	hom	30
downstream	gene_7284,gene_7285	CE17650_8590,e_gw1.103.15.1	scaffold_103	38534	38534	A	G	hom	30
exonic	gene_7291	CE17738_776	scaffold_103	50988	50988	C	T	hom	30
exonic	gene_7291	CE17738_776	scaffold_103	50990	50990	A	G	hom	30
exonic	gene_7291	CE17738_776	scaffold_103	51002	51002	G	C	hom	30
exonic	gene_7291	CE17738_776	scaffold_103	51004	51004	T	A	hom	30
exonic	gene_7291	CE17738_776	scaffold_103	51005	51005	T	A	hom	30
exonic	gene_7291	CE17738_776	scaffold_103	51006	51006	T	A	hom	30
exonic	gene_7291	CE17738_776	scaffold_103	51008	51008	C	G	hom	30
exonic	gene_7291	CE17738_776	scaffold_103	51017	51017	C	T	hom	30
exonic	gene_7291	CE17738_776	scaffold_103	51023	51023	G	T	hom	30
exonic	gene_7291	CE17738_776	scaffold_103	51024	51024	G	T	hom	30
exonic	gene_7291	CE17738_776	scaffold_103	51027	51027	G	T	hom	30
exonic	gene_7304	CE17991_813	scaffold_103	81103	81103	T	C	hom	30
UTR5	gene_7322	fgenesh1_kg.104_#_14_#_Locus4547v1rpkm16.51	scaffold_104	30922	30922	C	T	hom	30
intergenic	gene_7337(dist=3664),gene_7338(dist=1006)	estExt_fgenesh1_pm.C_1040022(dist=3664),fgenesh1_kg.104_#_35_#_Locus4001v1rpkm21.86(dist=1006)	scaffold_104	74633	74633	G	A	hom	30
exonic	gene_7339	fgenesh1_pg.104_#_26	scaffold_104	81354	81354	G	A	hom	30
upstream	gene_7342	fgenesh1_kg.105_#_1_#_Locus3377v1rpkm29.65	scaffold_105	255	255	A	G	hom	30
upstream;downstream	gene_7347;gene_7346	fgenesh1_pg.105_#_5;fgenesh1_kg.105_#_5_#_Locus14163v1rpkm0.53	scaffold_105	13029	13029	C	T	hom	30
upstream;downstream	gene_7347;gene_7346	fgenesh1_pg.105_#_5;fgenesh1_kg.105_#_5_#_Locus14163v1rpkm0.53	scaffold_105	13033	13033	A	G	hom	30
upstream;downstream	gene_7347;gene_7346	fgenesh1_pg.105_#_5;fgenesh1_kg.105_#_5_#_Locus14163v1rpkm0.53	scaffold_105	13038	13038	A	G	hom	30
upstream;downstream	gene_7347;gene_7346	fgenesh1_pg.105_#_5;fgenesh1_kg.105_#_5_#_Locus14163v1rpkm0.53	scaffold_105	13043	13043	A	G	hom	30
upstream;downstream	gene_7347;gene_7346	fgenesh1_pg.105_#_5;fgenesh1_kg.105_#_5_#_Locus14163v1rpkm0.53	scaffold_105	13049	13049	C	T	hom	30
upstream;downstream	gene_7347;gene_7346	fgenesh1_pg.105_#_5;fgenesh1_kg.105_#_5_#_Locus14163v1rpkm0.53	scaffold_105	13061	13061	A	G	hom	30
exonic	gene_7347	fgenesh1_pg.105_#_5	scaffold_105	15870	15870	C	T	hom	30
exonic	gene_7354	estExt_fgenesh1_pm.C_1050008	scaffold_105	26878	26878	G	A	hom	30
exonic	gene_7371	estExt_fgenesh1_pg.C_1050020	scaffold_105	53923	53923	G	A	hom	30
downstream	gene_7378,gene_7379	estExt_Genewise1Plus.C_1050054,fgenesh1_kg.105_#_44_#_Locus7682v1rpkm3.05	scaffold_105	68038	68038	C	A	hom	30
downstream	gene_7378,gene_7379	estExt_Genewise1Plus.C_1050054,fgenesh1_kg.105_#_44_#_Locus7682v1rpkm3.05	scaffold_105	68227	68227	C	T	hom	30
exonic	gene_7379	fgenesh1_kg.105_#_44_#_Locus7682v1rpkm3.05	scaffold_105	68733	68733	A	G	hom	30
exonic	gene_7379	fgenesh1_kg.105_#_44_#_Locus7682v1rpkm3.05	scaffold_105	68793	68793	A	G	hom	30
exonic	gene_7379	fgenesh1_kg.105_#_44_#_Locus7682v1rpkm3.05	scaffold_105	68805	68805	A	G	hom	30
exonic	gene_7379	fgenesh1_kg.105_#_44_#_Locus7682v1rpkm3.05	scaffold_105	68825	68825	C	G	hom	30
UTR3	gene_7388	fgenesh1_kg.106_#_4_#_Locus3019v1rpkm35.40	scaffold_106	5617	5617	T	G	hom	30
intergenic	gene_7416(dist=1121),gene_7417(dist=1176)	CE22437_72380(dist=1121),gm1.5989_g(dist=1176)	scaffold_106	64910	64910	A	C	hom	30
upstream	gene_7427	estExt_fgenesh1_pm.C_1070001	scaffold_107	1266	1266	G	A	hom	30
downstream	gene_7434	fgenesh1_pm.107_#_5	scaffold_107	15553	15553	C	T	hom	30
intergenic	gene_7436(dist=1326),gene_7437(dist=1909)	fgenesh1_kg.107_#_7_#_Locus4102v1rpkm20.90(dist=1326),estExt_Genemark1.C_1070011(dist=1909)	scaffold_107	25243	25243	C	T	hom	30
downstream	gene_7444,gene_7445	fgenesh1_pg.107_#_17,fgenesh1_pm.107_#_13	scaffold_107	39567	39567	T	G	hom	30
exonic	gene_7446	fgenesh1_kg.107_#_14_#_Locus2639v1rpkm43.54	scaffold_107	53365	53365	A	G	hom	30
upstream;downstream	gene_7450;gene_7449	estExt_Genewise1Plus.C_1070060;estExt_fgenesh1_pg.C_1070021	scaffold_107	63855	63855	C	T	hom	30
upstream;downstream	gene_7450;gene_7449	estExt_Genewise1Plus.C_1070060;estExt_fgenesh1_pg.C_1070021	scaffold_107	63924	63924	T	C	hom	30
exonic	gene_7450	estExt_Genewise1Plus.C_1070060	scaffold_107	64548	64548	C	A	hom	30
exonic	gene_7454	gm1.6022_g	scaffold_107	78319	78319	A	G	hom	30
upstream	gene_7469	fgenesh1_kg.108_#_17_#_Locus3782v1rpkm24.33	scaffold_108	23941	23941	T	C	hom	30
upstream	gene_7469	fgenesh1_kg.108_#_17_#_Locus3782v1rpkm24.33	scaffold_108	23942	23942	G	A	hom	30
upstream	gene_7469	fgenesh1_kg.108_#_17_#_Locus3782v1rpkm24.33	scaffold_108	23971	23971	C	T	hom	30
upstream	gene_7469	fgenesh1_kg.108_#_17_#_Locus3782v1rpkm24.33	scaffold_108	23972	23972	A	G	hom	30
upstream	gene_7469	fgenesh1_kg.108_#_17_#_Locus3782v1rpkm24.33	scaffold_108	24056	24056	A	G	hom	30
upstream	gene_7469	fgenesh1_kg.108_#_17_#_Locus3782v1rpkm24.33	scaffold_108	24059	24059	C	T	hom	30
upstream	gene_7469	fgenesh1_kg.108_#_17_#_Locus3782v1rpkm24.33	scaffold_108	24069	24069	C	T	hom	30
upstream	gene_7469	fgenesh1_kg.108_#_17_#_Locus3782v1rpkm24.33	scaffold_108	24071	24071	A	G	hom	30
upstream	gene_7469	fgenesh1_kg.108_#_17_#_Locus3782v1rpkm24.33	scaffold_108	24118	24118	C	T	hom	30
intergenic	gene_7469(dist=1092),gene_7471(dist=2023)	fgenesh1_kg.108_#_17_#_Locus3782v1rpkm24.33(dist=1092),MIX1382_249_57(dist=2023)	scaffold_108	24780	24780	A	T	hom	30
intergenic	gene_7469(dist=1160),gene_7471(dist=1955)	fgenesh1_kg.108_#_17_#_Locus3782v1rpkm24.33(dist=1160),MIX1382_249_57(dist=1955)	scaffold_108	24848	24848	T	C	hom	30
exonic	gene_7482	fgenesh1_kg.108_#_30_#_Locus2441v1rpkm48.67	scaffold_108	50925	50925	C	T	hom	30
upstream	gene_7483,gene_7484	fgenesh1_kg.108_#_31_#_Locus6949v1rpkm4.35,fgenesh1_kg.108_#_32_#_Locus2068v1rpkm62.26	scaffold_108	54172	54172	G	T	hom	30
exonic	gene_7493	MIX1423_3229_7	scaffold_108	69589	69589	A	G	hom	30
exonic	gene_7493	MIX1423_3229_7	scaffold_108	72804	72804	A	G	hom	30
intergenic	NONE(dist=NONE),gene_7496(dist=1343)	NONE(dist=NONE),estExt_Genemark1.C_1090001(dist=1343)	scaffold_109	36	36	C	T	hom	30
intergenic	NONE(dist=NONE),gene_7496(dist=1341)	NONE(dist=NONE),estExt_Genemark1.C_1090001(dist=1341)	scaffold_109	38	38	A	T	hom	30
exonic	gene_7496	estExt_Genemark1.C_1090001	scaffold_109	3768	3768	A	G	hom	30
exonic	gene_7498	MIX1455_1825_15	scaffold_109	32592	32592	A	C	hom	30
exonic	gene_7502	MIX1469_614_32	scaffold_109	41030	41030	T	C	hom	30
intronic	gene_7502	MIX1469_614_32	scaffold_109	44640	44640	A	G	hom	30
intergenic	gene_1390(dist=4455),gene_1392(dist=3851)	fgenesh1_pg.11_#_2(dist=4455),fgenesh1_kg.11_#_7_#_Locus5266v1rpkm10.98(dist=3851)	scaffold_11	12324	12324	T	C	hom	30
intergenic	gene_1390(dist=4456),gene_1392(dist=3850)	fgenesh1_pg.11_#_2(dist=4456),fgenesh1_kg.11_#_7_#_Locus5266v1rpkm10.98(dist=3850)	scaffold_11	12325	12325	G	C	hom	30
intergenic	gene_1390(dist=4472),gene_1392(dist=3834)	fgenesh1_pg.11_#_2(dist=4472),fgenesh1_kg.11_#_7_#_Locus5266v1rpkm10.98(dist=3834)	scaffold_11	12341	12341	A	G	hom	30
intergenic	gene_1390(dist=4479),gene_1392(dist=3827)	fgenesh1_pg.11_#_2(dist=4479),fgenesh1_kg.11_#_7_#_Locus5266v1rpkm10.98(dist=3827)	scaffold_11	12348	12348	G	A	hom	30
intergenic	gene_1390(dist=4489),gene_1392(dist=3817)	fgenesh1_pg.11_#_2(dist=4489),fgenesh1_kg.11_#_7_#_Locus5266v1rpkm10.98(dist=3817)	scaffold_11	12358	12358	A	G	hom	30
intergenic	gene_1390(dist=4514),gene_1392(dist=3792)	fgenesh1_pg.11_#_2(dist=4514),fgenesh1_kg.11_#_7_#_Locus5266v1rpkm10.98(dist=3792)	scaffold_11	12383	12383	C	T	hom	30
intergenic	gene_1390(dist=4516),gene_1392(dist=3790)	fgenesh1_pg.11_#_2(dist=4516),fgenesh1_kg.11_#_7_#_Locus5266v1rpkm10.98(dist=3790)	scaffold_11	12385	12385	T	C	hom	30
intergenic	gene_1390(dist=5026),gene_1392(dist=3280)	fgenesh1_pg.11_#_2(dist=5026),fgenesh1_kg.11_#_7_#_Locus5266v1rpkm10.98(dist=3280)	scaffold_11	12895	12895	C	G	hom	30
downstream	gene_1398	CE25917_1126	scaffold_11	28729	28729	A	C	hom	30
exonic	gene_1405	fgenesh1_pm.11_#_11	scaffold_11	44444	44444	A	G	hom	30
upstream	gene_1406	e_gw1.11.179.1	scaffold_11	49058	49058	C	A	hom	30
downstream	gene_1418	fgenesh1_kg.11_#_36_#_Locus3237v1rpkm31.89	scaffold_11	75201	75201	G	A	hom	30
UTR3	gene_1425	fgenesh1_kg.11_#_44_#_Locus2527v1rpkm46.35	scaffold_11	94898	94898	T	C	hom	30
exonic	gene_1434	fgenesh1_pg.11_#_36	scaffold_11	118995	118995	T	G	hom	30
exonic	gene_1435	gm1.1153_g	scaffold_11	120014	120014	A	G	hom	30
exonic	gene_1443	estExt_fgenesh1_pg.C_110044	scaffold_11	136201	136201	A	G	hom	30
exonic	gene_1448	gw1.11.105.1	scaffold_11	154338	154338	T	C	hom	30
upstream;downstream	gene_1458;gene_1457	gm1.1173_g;estExt_Genewise1.C_110114	scaffold_11	171240	171240	C	T	hom	30
upstream;downstream	gene_1458;gene_1457	gm1.1173_g;estExt_Genewise1.C_110114	scaffold_11	171247	171247	A	T	hom	30
upstream;downstream	gene_1458;gene_1457	gm1.1173_g;estExt_Genewise1.C_110114	scaffold_11	171250	171250	C	T	hom	30
intergenic	gene_1490(dist=2560),gene_1493(dist=2466)	CE29319_30160(dist=2560),CE29399_492(dist=2466)	scaffold_11	252996	252996	G	A	hom	30
exonic	gene_1501	CE29606_5156	scaffold_11	265922	265922	C	T	hom	30
upstream	gene_1502	CE29207_27323	scaffold_11	268228	268228	T	C	hom	30
downstream	gene_7518	fgenesh1_kg.110_#_2_#_Locus2485v1rpkm47.29	scaffold_110	1187	1187	T	A	hom	30
upstream	gene_7519,gene_7520	fgenesh1_kg.110_#_3_#_Locus2143v1rpkm58.73,fgenesh1_pg.110_#_3	scaffold_110	6044	6044	G	A	hom	30
upstream	gene_7519,gene_7520	fgenesh1_kg.110_#_3_#_Locus2143v1rpkm58.73,fgenesh1_pg.110_#_3	scaffold_110	6144	6144	C	A	hom	30
exonic	gene_7531	estExt_fgenesh1_pm.C_1100012	scaffold_110	31336	31336	T	G	hom	30
UTR5	gene_7541	fgenesh1_kg.110_#_26_#_Locus5713v1rpkm8.56	scaffold_110	55158	55158	G	A	hom	30
downstream	gene_7542,gene_7543	e_gw1.110.43.1,estExt_Genewise1.C_1100061	scaffold_110	62788	62788	C	G	hom	30
upstream;downstream	gene_7547;gene_7548	fgenesh1_pg.110_#_27;CE30700_15	scaffold_110	71766	71766	C	A	hom	30
downstream	gene_7548	CE30700_15	scaffold_110	72382	72382	A	C	hom	30
exonic	gene_7549	e_gw1.110.57.1	scaffold_110	74896	74896	A	G	hom	30
downstream	gene_7563	estExt_fgenesh1_pm.C_1110003	scaffold_111	19253	19253	T	C	hom	30
intronic	gene_7565	fgenesh1_pm.111_#_5	scaffold_111	25519	25519	A	C	hom	30
exonic	gene_7575	CE31347_43336	scaffold_111	48135	48135	T	G	hom	30
upstream;downstream	gene_7580;gene_7581	e_gw1.111.31.1;fgenesh1_kg.111_#_31_#_Locus2276v1rpkm53.85	scaffold_111	59209	59209	C	A	hom	30
exonic	gene_7605	fgenesh1_kg.112_#_16_#_Locus1913v1rpkm69.13	scaffold_112	31962	31962	T	C	hom	30
exonic	gene_7606	estExt_Genewise1Plus.C_1120033	scaffold_112	34425	34425	T	C	hom	30
exonic	gene_7614	fgenesh1_pg.112_#_20	scaffold_112	57556	57556	G	A	hom	30
intergenic	gene_7619(dist=1674),gene_7621(dist=3337)	fgenesh1_kg.113_#_2_#_Locus2834v1rpkm39.06(dist=1674),e_gw1.113.43.1(dist=3337)	scaffold_113	3659	3659	G	T	hom	30
intergenic	gene_7619(dist=2832),gene_7621(dist=2179)	fgenesh1_kg.113_#_2_#_Locus2834v1rpkm39.06(dist=2832),e_gw1.113.43.1(dist=2179)	scaffold_113	4817	4817	T	C	hom	30
intergenic	gene_7626(dist=8413),gene_7628(dist=37162)	fgenesh1_kg.113_#_10_#_Locus1315v1rpkm112.44(dist=8413),e_gw1.113.62.1(dist=37162)	scaffold_113	28631	28631	A	G	hom	30
intergenic	gene_7626(dist=19015),gene_7628(dist=26560)	fgenesh1_kg.113_#_10_#_Locus1315v1rpkm112.44(dist=19015),e_gw1.113.62.1(dist=26560)	scaffold_113	39233	39233	A	G	hom	30
intergenic	gene_7626(dist=21940),gene_7628(dist=23635)	fgenesh1_kg.113_#_10_#_Locus1315v1rpkm112.44(dist=21940),e_gw1.113.62.1(dist=23635)	scaffold_113	42158	42158	T	C	hom	30
intergenic	gene_7626(dist=29945),gene_7628(dist=15630)	fgenesh1_kg.113_#_10_#_Locus1315v1rpkm112.44(dist=29945),e_gw1.113.62.1(dist=15630)	scaffold_113	50163	50163	G	A	hom	30
intergenic	gene_7626(dist=36150),gene_7628(dist=9425)	fgenesh1_kg.113_#_10_#_Locus1315v1rpkm112.44(dist=36150),e_gw1.113.62.1(dist=9425)	scaffold_113	56368	56368	T	C	hom	30
intergenic	gene_7629(dist=2912),NONE(dist=NONE)	e_gw1.113.54.1(dist=2912),NONE(dist=NONE)	scaffold_113	71222	71222	T	C	hom	30
intergenic	gene_7629(dist=2920),NONE(dist=NONE)	e_gw1.113.54.1(dist=2920),NONE(dist=NONE)	scaffold_113	71230	71230	T	C	hom	30
intergenic	gene_7629(dist=2935),NONE(dist=NONE)	e_gw1.113.54.1(dist=2935),NONE(dist=NONE)	scaffold_113	71245	71245	T	C	hom	30
intergenic	gene_7629(dist=2948),NONE(dist=NONE)	e_gw1.113.54.1(dist=2948),NONE(dist=NONE)	scaffold_113	71258	71258	A	G	hom	30
intergenic	gene_7629(dist=2953),NONE(dist=NONE)	e_gw1.113.54.1(dist=2953),NONE(dist=NONE)	scaffold_113	71263	71263	C	T	hom	30
intergenic	gene_7629(dist=2981),NONE(dist=NONE)	e_gw1.113.54.1(dist=2981),NONE(dist=NONE)	scaffold_113	71291	71291	C	T	hom	30
exonic	gene_7630	CE32906_1469	scaffold_114	1185	1185	G	A	hom	30
upstream	gene_7631	gm1.6161_g	scaffold_114	4083	4083	C	A	hom	30
upstream;downstream	gene_7635;gene_7634	e_gw1.114.72.1;estExt_fgenesh1_pg.C_1140003	scaffold_114	9180	9180	G	A	hom	30
upstream	gene_7643	fgenesh1_pg.114_#_12	scaffold_114	29134	29134	G	T	hom	30
exonic	gene_7648	gm1.6176_g	scaffold_114	39546	39546	T	C	hom	30
intergenic	gene_7666(dist=1379),gene_7667(dist=1092)	gm1.6190_g(dist=1379),gm1.6191_g(dist=1092)	scaffold_115	2783	2783	T	C	hom	30
intergenic	gene_7666(dist=1394),gene_7667(dist=1077)	gm1.6190_g(dist=1394),gm1.6191_g(dist=1077)	scaffold_115	2798	2798	T	C	hom	30
exonic	gene_7667	gm1.6191_g	scaffold_115	4298	4298	A	T	hom	30
upstream	gene_7672,gene_7673	e_gw1.115.15.1,estExt_Genewise1Plus.C_1150014	scaffold_115	15006	15006	C	G	hom	30
upstream	gene_7672,gene_7673	e_gw1.115.15.1,estExt_Genewise1Plus.C_1150014	scaffold_115	15007	15007	T	G	hom	30
exonic	gene_7675	CE34547_13	scaffold_115	18582	18582	T	C	hom	30
intergenic	gene_7675(dist=1760),gene_7676(dist=1041)	CE34547_13(dist=1760),e_gw1.115.18.1(dist=1041)	scaffold_115	20603	20603	A	G	hom	30
intronic	gene_7681	estExt_Genewise1Plus.C_1150029	scaffold_115	34910	34910	G	A	hom	30
exonic	gene_7686	estExt_fgenesh1_pm.C_1150017	scaffold_115	46776	46776	A	G	hom	30
exonic	gene_7692	fgenesh1_pm.115_#_19	scaffold_115	57505	57505	A	G	hom	30
exonic	gene_7692	fgenesh1_pm.115_#_19	scaffold_115	57562	57562	C	G	hom	30
upstream;downstream	gene_7693;gene_7692	CE37945_9305;fgenesh1_pm.115_#_19	scaffold_115	58735	58735	T	C	hom	30
upstream;downstream	gene_7693;gene_7692	CE37945_9305;fgenesh1_pm.115_#_19	scaffold_115	59113	59113	T	C	hom	30
intronic	gene_7699	fgenesh1_kg.115_#_33_#_Locus5967v1rpkm7.46	scaffold_115	70316	70316	T	C	hom	30
intronic	gene_7709	fgenesh1_kg.116_#_12_#_Locus7349v1rpkm3.57	scaffold_116	16398	16398	G	T	hom	30
intergenic	gene_7711(dist=1220),gene_7712(dist=3463)	estExt_fgenesh1_pm.C_1160008(dist=1220),fgenesh1_kg.116_#_18_#_Locus3554v1rpkm27.15(dist=3463)	scaffold_116	24466	24466	C	T	hom	30
upstream	gene_7712	fgenesh1_kg.116_#_18_#_Locus3554v1rpkm27.15	scaffold_116	30296	30296	A	G	hom	30
upstream	gene_7730	fgenesh1_kg.116_#_34_#_Locus14922v1rpkm0.42	scaffold_116	65952	65952	G	T	hom	30
upstream	gene_7739,gene_7740	estExt_Genewise1Plus.C_1170010,fgenesh1_kg.117_#_5_#_Locus177v2rpkm43.55_PRE	scaffold_117	9521	9521	T	G	hom	30
exonic	gene_7740	estExt_Genewise1Plus.C_1170010	scaffold_117	12496	12496	C	T	hom	30
exonic	gene_7746	e_gw1.117.19.1	scaffold_117	21776	21776	C	A	hom	30
upstream;downstream	gene_7785;gene_7784	CE41425_60;fgenesh1_kg.118_#_11_#_Locus9538v1rpkm1.65	scaffold_118	21637	21637	G	T	hom	30
upstream	gene_7802	fgenesh1_pm.118_#_12	scaffold_118	48963	48963	G	T	hom	30
intergenic	gene_7810(dist=3236),NONE(dist=NONE)	CE41941_710(dist=3236),NONE(dist=NONE)	scaffold_118	70277	70277	C	T	hom	30
exonic	gene_7833	fgenesh1_kg.119_#_31_#_Locus7716v5rpkm0.37	scaffold_119	57958	57958	C	T	hom	30
upstream	gene_7838,gene_7839	e_gw1.119.50.1,estExt_fgenesh1_pg.C_1190022	scaffold_119	64293	64293	C	T	hom	30
downstream	gene_7839	e_gw1.119.50.1	scaffold_119	70253	70253	A	G	hom	30
downstream	gene_1503,gene_1504	estExt_Genewise1.C_120004,fgenesh1_kg.12_#_1_#_Locus3882v1rpkm23.23	scaffold_12	4066	4066	G	A	hom	30
UTR3	gene_1514	fgenesh1_kg.12_#_13_#_Locus287v1rpkm644.06	scaffold_12	25584	25584	C	G	hom	30
exonic	gene_1517	estExt_Genemark1.C_120013	scaffold_12	31932	31932	C	T	hom	30
exonic	gene_1517	estExt_Genemark1.C_120013	scaffold_12	32101	32101	G	A	hom	30
exonic	gene_1517	estExt_Genemark1.C_120013	scaffold_12	32360	32360	C	T	hom	30
exonic	gene_1518	fgenesh1_kg.12_#_19_#_Locus1856v1rpkm72.00	scaffold_12	33980	33980	C	A	hom	30
exonic	gene_1519	gm1.1221_g	scaffold_12	38729	38729	A	G	hom	30
downstream	gene_1522	CE44204_8767	scaffold_12	50876	50876	T	C	hom	30
downstream	gene_1526	gw1.12.13.1	scaffold_12	55022	55022	T	C	hom	30
downstream	gene_1526	gw1.12.13.1	scaffold_12	55165	55165	A	G	hom	30
downstream	gene_1526	gw1.12.13.1	scaffold_12	55173	55173	C	G	hom	30
downstream	gene_1526	gw1.12.13.1	scaffold_12	55186	55186	C	T	hom	30
downstream	gene_1526	gw1.12.13.1	scaffold_12	55188	55188	A	C	hom	30
exonic	gene_1526	gw1.12.13.1	scaffold_12	56097	56097	T	G	hom	30
upstream;downstream	gene_1531;gene_1529,gene_1530	MIX2539_14_58;MIX2535_36_64,MIX2537_14_73	scaffold_12	61526	61526	A	G	hom	30
upstream;downstream	gene_1531;gene_1529,gene_1530	MIX2539_14_58;MIX2535_36_64,MIX2537_14_73	scaffold_12	61531	61531	C	T	hom	30
upstream;downstream	gene_1531;gene_1529,gene_1530	MIX2539_14_58;MIX2535_36_64,MIX2537_14_73	scaffold_12	61555	61555	C	T	hom	30
upstream;downstream	gene_1531;gene_1529,gene_1530	MIX2539_14_58;MIX2535_36_64,MIX2537_14_73	scaffold_12	61563	61563	C	T	hom	30
upstream;downstream	gene_1531;gene_1530	MIX2539_14_58;MIX2537_14_73	scaffold_12	61565	61565	T	C	hom	30
upstream;downstream	gene_1531;gene_1530	MIX2539_14_58;MIX2537_14_73	scaffold_12	61573	61573	C	T	hom	30
exonic	gene_1531	MIX2539_14_58	scaffold_12	62178	62178	C	A	hom	30
exonic	gene_1532	estExt_fgenesh1_pm.C_120015	scaffold_12	63154	63154	C	T	hom	30
exonic	gene_1534	fgenesh1_kg.12_#_34_#_Locus3575v2rpkm21.94	scaffold_12	68859	68859	A	C	hom	30
downstream	gene_1536	fgenesh1_kg.12_#_36_#_Locus3575v4rpkm1.45_PRE	scaffold_12	72161	72161	A	T	hom	30
exonic	gene_1539	fgenesh1_kg.12_#_39_#_Locus4977v1rpkm12.82	scaffold_12	78090	78090	A	G	hom	30
exonic	gene_1562	gm1.1257_g	scaffold_12	135480	135480	T	C	hom	30
exonic	gene_1573	fgenesh1_pm.12_#_44	scaffold_12	162308	162308	T	A	hom	30
exonic	gene_1580	gm1.1270_g	scaffold_12	180209	180209	G	C	hom	30
exonic	gene_1618	fgenesh1_kg.12_#_111_#_Locus1091v1rpkm141.56	scaffold_12	264954	264954	T	A	hom	30
intronic	gene_7840	MIX2721_1176_38	scaffold_120	1638	1638	G	A	hom	30
downstream	gene_7842	estExt_Genewise1.C_1200006	scaffold_120	8043	8043	T	C	hom	30
upstream;downstream	gene_7847;gene_7848	e_gw1.120.18.1;estExt_Genemark1.C_1200008	scaffold_120	20998	20998	A	T	hom	30
upstream;downstream	gene_7847;gene_7848	e_gw1.120.18.1;estExt_Genemark1.C_1200008	scaffold_120	21001	21001	A	C	hom	30
upstream;downstream	gene_7847;gene_7848	e_gw1.120.18.1;estExt_Genemark1.C_1200008	scaffold_120	21005	21005	A	C	hom	30
upstream;downstream	gene_7847;gene_7848	e_gw1.120.18.1;estExt_Genemark1.C_1200008	scaffold_120	21011	21011	G	T	hom	30
upstream;downstream	gene_7851;gene_7854	fgenesh1_pm.120_#_7;fgenesh1_kg.120_#_13_#_Locus859v2rpkm133.21	scaffold_120	35300	35300	G	T	hom	30
exonic	gene_7858	estExt_Genewise1Plus.C_1200037	scaffold_120	46549	46549	T	C	hom	30
upstream	gene_7866	fgenesh1_kg.120_#_31_#_Locus3651v1rpkm25.82	scaffold_120	57964	57964	G	A	hom	30
downstream	gene_7869	fgenesh1_pg.120_#_21	scaffold_120	63346	63346	C	T	hom	30
downstream	gene_7869	fgenesh1_pg.120_#_21	scaffold_120	63408	63408	T	C	hom	30
downstream	gene_7869	fgenesh1_pg.120_#_21	scaffold_120	63416	63416	A	G	hom	30
downstream	gene_7869	fgenesh1_pg.120_#_21	scaffold_120	63430	63430	G	A	hom	30
downstream	gene_7869	fgenesh1_pg.120_#_21	scaffold_120	63446	63446	C	T	hom	30
downstream	gene_7869	fgenesh1_pg.120_#_21	scaffold_120	63453	63453	C	A	hom	30
downstream	gene_7869	fgenesh1_pg.120_#_21	scaffold_120	63614	63614	A	G	hom	30
downstream	gene_7869	fgenesh1_pg.120_#_21	scaffold_120	63625	63625	T	C	hom	30
intergenic	NONE(dist=NONE),gene_7873(dist=1371)	NONE(dist=NONE),fgenesh1_kg.121_#_1_#_Locus2200v1rpkm56.87(dist=1371)	scaffold_121	250	250	A	G	hom	30
UTR5	gene_7875	fgenesh1_kg.121_#_2_#_Locus368v1rpkm492.16	scaffold_121	3719	3719	C	T	hom	30
exonic	gene_7885	e_gw1.121.41.1	scaffold_121	28034	28034	T	G	hom	30
exonic	gene_7890	e_gw1.121.9.1	scaffold_121	44782	44782	A	G	hom	30
exonic	gene_7897	fgenesh1_kg.121_#_24_#_Locus12540v1rpkm0.82	scaffold_121	61470	61470	A	C	hom	30
exonic	gene_7897	fgenesh1_kg.121_#_24_#_Locus12540v1rpkm0.82	scaffold_121	61489	61489	A	G	hom	30
exonic	gene_7897	fgenesh1_kg.121_#_24_#_Locus12540v1rpkm0.82	scaffold_121	61585	61585	C	T	hom	30
exonic	gene_7897	fgenesh1_kg.121_#_24_#_Locus12540v1rpkm0.82	scaffold_121	61588	61588	A	G	hom	30
exonic	gene_7897	fgenesh1_kg.121_#_24_#_Locus12540v1rpkm0.82	scaffold_121	61647	61647	A	G	hom	30
exonic	gene_7897	fgenesh1_kg.121_#_24_#_Locus12540v1rpkm0.82	scaffold_121	61652	61652	C	T	hom	30
exonic	gene_7897	fgenesh1_kg.121_#_24_#_Locus12540v1rpkm0.82	scaffold_121	61698	61698	A	G	hom	30
exonic	gene_7897	fgenesh1_kg.121_#_24_#_Locus12540v1rpkm0.82	scaffold_121	61704	61704	A	G	hom	30
intronic	gene_7913	CE50578_38	scaffold_122	19595	19595	G	T	hom	30
exonic	gene_7919	e_gw1.122.30.1	scaffold_122	31177	31177	T	C	hom	30
exonic	gene_7919	e_gw1.122.30.1	scaffold_122	31272	31272	G	A	hom	30
exonic	gene_7934	MIX2944_22_46	scaffold_122	66630	66630	A	G	hom	30
intergenic	gene_7934(dist=1197),NONE(dist=NONE)	MIX2944_22_46(dist=1197),NONE(dist=NONE)	scaffold_122	69220	69220	G	T	hom	30
intergenic	gene_7934(dist=1199),NONE(dist=NONE)	MIX2944_22_46(dist=1199),NONE(dist=NONE)	scaffold_122	69222	69222	G	T	hom	30
intergenic	gene_7934(dist=1202),NONE(dist=NONE)	MIX2944_22_46(dist=1202),NONE(dist=NONE)	scaffold_122	69225	69225	G	T	hom	30
intergenic	gene_7934(dist=1203),NONE(dist=NONE)	MIX2944_22_46(dist=1203),NONE(dist=NONE)	scaffold_122	69226	69226	A	T	hom	30
UTR3	gene_7938	fgenesh1_kg.123_#_6_#_Locus14626v5rpkm0.28	scaffold_123	9812	9812	T	C	hom	30
upstream	gene_7959	gm1.6410_g	scaffold_123	52386	52386	C	T	hom	30
UTR3	gene_7961	fgenesh1_kg.123_#_30_#_Locus702v1rpkm235.82	scaffold_123	55426	55426	T	C	hom	30
UTR5	gene_7961	fgenesh1_kg.123_#_30_#_Locus702v1rpkm235.82	scaffold_123	56463	56463	A	G	hom	30
intergenic	gene_7963(dist=2244),gene_7964(dist=3265)	fgenesh1_kg.123_#_31_#_Locus5561v1rpkm9.38(dist=2244),fgenesh1_pg.123_#_23(dist=3265)	scaffold_123	60903	60903	C	T	hom	30
intergenic	gene_7963(dist=2245),gene_7964(dist=3264)	fgenesh1_kg.123_#_31_#_Locus5561v1rpkm9.38(dist=2245),fgenesh1_pg.123_#_23(dist=3264)	scaffold_123	60904	60904	G	T	hom	30
intergenic	gene_7963(dist=2251),gene_7964(dist=3258)	fgenesh1_kg.123_#_31_#_Locus5561v1rpkm9.38(dist=2251),fgenesh1_pg.123_#_23(dist=3258)	scaffold_123	60910	60910	C	T	hom	30
intergenic	gene_7963(dist=2254),gene_7964(dist=3255)	fgenesh1_kg.123_#_31_#_Locus5561v1rpkm9.38(dist=2254),fgenesh1_pg.123_#_23(dist=3255)	scaffold_123	60913	60913	A	G	hom	30
intergenic	gene_7963(dist=2263),gene_7964(dist=3246)	fgenesh1_kg.123_#_31_#_Locus5561v1rpkm9.38(dist=2263),fgenesh1_pg.123_#_23(dist=3246)	scaffold_123	60922	60922	A	G	hom	30
intergenic	gene_7963(dist=2325),gene_7964(dist=3184)	fgenesh1_kg.123_#_31_#_Locus5561v1rpkm9.38(dist=2325),fgenesh1_pg.123_#_23(dist=3184)	scaffold_123	60984	60984	A	G	hom	30
upstream;downstream	gene_7967;gene_7968	estExt_Genemark1.C_1240001;estExt_fgenesh1_pg.C_1240002	scaffold_124	6362	6362	A	T	hom	30
upstream	gene_7976,gene_7977	fgenesh1_kg.124_#_9_#_Locus915v1rpkm174.26,fgenesh1_pm.124_#_8	scaffold_124	23115	23115	T	A	hom	30
upstream	gene_7976,gene_7977	fgenesh1_kg.124_#_9_#_Locus915v1rpkm174.26,fgenesh1_pm.124_#_8	scaffold_124	23501	23501	T	C	hom	30
upstream	gene_7976,gene_7977	fgenesh1_kg.124_#_9_#_Locus915v1rpkm174.26,fgenesh1_pm.124_#_8	scaffold_124	23502	23502	T	A	hom	30
exonic	gene_7978	estExt_Genewise1Plus.C_1240030	scaffold_124	28002	28002	G	A	hom	30
exonic	gene_7987	CE53561_4448	scaffold_124	43080	43080	G	A	hom	30
exonic	gene_7996	CE53724_1401	scaffold_124	57800	57800	C	T	hom	30
exonic	gene_7997	CE53701_3708	scaffold_124	58646	58646	T	G	hom	30
intergenic	gene_8000(dist=1633),NONE(dist=NONE)	CE53808_1032(dist=1633),NONE(dist=NONE)	scaffold_124	65874	65874	G	A	hom	30
intergenic	gene_8000(dist=2556),NONE(dist=NONE)	CE53808_1032(dist=2556),NONE(dist=NONE)	scaffold_124	66797	66797	C	A	hom	30
UTR5	gene_8027	CE54685_333	scaffold_126	111	111	C	A	hom	30
exonic	gene_8029	CE54708_11672	scaffold_126	4856	4856	T	C	hom	30
exonic	gene_8036	fgenesh1_pm.126_#_6	scaffold_126	26148	26148	C	T	hom	30
downstream	gene_8048	fgenesh1_kg.126_#_22_#_Locus5047v4rpkm1.04_PRE	scaffold_126	54150	54150	G	A	hom	30
exonic	gene_8048	fgenesh1_kg.126_#_22_#_Locus5047v4rpkm1.04_PRE	scaffold_126	55117	55117	C	T	hom	30
exonic	gene_8049	CE55089_16074	scaffold_126	57599	57599	T	C	hom	30
downstream	gene_8050	gw1.126.14.1	scaffold_126	63770	63770	A	G	hom	30
exonic	gene_8057	fgenesh1_kg.127_#_4_#_Locus5983v1rpkm7.42	scaffold_127	15017	15017	G	A	hom	30
exonic	gene_8059	fgenesh1_pm.127_#_6	scaffold_127	19459	19459	C	T	hom	30
exonic	gene_8061	estExt_fgenesh1_pm.C_1270008	scaffold_127	23871	23871	C	T	hom	30
exonic	gene_8065	fgenesh1_pm.127_#_10	scaffold_127	30321	30321	G	A	hom	30
UTR5	gene_8069	fgenesh1_kg.127_#_14_#_Locus1639v1rpkm85.95	scaffold_127	38079	38079	G	A	hom	30
exonic	gene_8070	estExt_fgenesh1_pg.C_1270015	scaffold_127	41041	41041	G	A	hom	30
upstream	gene_8080	estExt_Genewise1Plus.C_1270061	scaffold_127	65363	65363	C	A	hom	30
exonic	gene_8083	estExt_fgenesh1_pm.C_1280002	scaffold_128	5233	5233	G	T	hom	30
exonic	gene_8089	fgenesh1_pm.128_#_8	scaffold_128	21733	21733	G	C	hom	30
exonic	gene_8099	e_gw1.128.38.1	scaffold_128	44993	44993	G	A	hom	30
exonic	gene_8102	MIX3162_5_32	scaffold_128	53456	53456	G	A	hom	30
intronic	gene_8110,gene_8111	fgenesh1_kg.129_#_4_#_Locus467v1rpkm386.99,fgenesh1_pg.129_#_1	scaffold_129	3408	3408	G	T	hom	30
exonic	gene_8127	CE57641_23358	scaffold_129	39454	39454	C	T	hom	30
intergenic	gene_8127(dist=1341),gene_8129(dist=2661)	CE57641_23358(dist=1341),e_gw1.129.61.1(dist=2661)	scaffold_129	42585	42585	T	A	hom	30
intronic	gene_8133	MIX3190_459_51	scaffold_129	52432	52432	C	T	hom	30
exonic	gene_1619	estExt_Genewise1Plus.C_130002	scaffold_13	2398	2398	G	A	hom	30
exonic	gene_1630	CE58255_1623	scaffold_13	28295	28295	C	A	hom	30
upstream;downstream	gene_1632;gene_1633	CE58241_2055;CE58155_9290	scaffold_13	31967	31967	T	A	hom	30
upstream;downstream	gene_1632;gene_1633	CE58241_2055;CE58155_9290	scaffold_13	31969	31969	T	A	hom	30
upstream;downstream	gene_1632;gene_1633	CE58241_2055;CE58155_9290	scaffold_13	31970	31970	G	A	hom	30
downstream	gene_1641,gene_1642	CE58498_1527,gm1.1315_g	scaffold_13	55665	55665	A	G	hom	30
downstream	gene_1641,gene_1642	CE58498_1527,gm1.1315_g	scaffold_13	55682	55682	C	T	hom	30
upstream;downstream	gene_1650;gene_1651	fgenesh1_kg.13_#_33_#_Locus647v1rpkm262.78;fgenesh1_kg.13_#_34_#_Locus11794v2rpkm0.71	scaffold_13	73072	73072	A	G	hom	30
exonic	gene_1656	fgenesh1_kg.13_#_43_#_Locus2935v1rpkm37.23	scaffold_13	82942	82942	G	A	hom	30
upstream	gene_1656,gene_1658	fgenesh1_kg.13_#_43_#_Locus2935v1rpkm37.23,fgenesh1_pm.13_#_26	scaffold_13	84838	84838	T	G	hom	30
exonic	gene_1658	fgenesh1_pm.13_#_26	scaffold_13	85865	85865	C	T	hom	30
downstream	gene_1658,gene_1659	fgenesh1_pm.13_#_26,gm1.1331_g	scaffold_13	92147	92147	T	G	hom	30
exonic	gene_1663	fgenesh1_kg.13_#_55_#_Locus958v1rpkm165.93	scaffold_13	103392	103392	C	T	hom	30
exonic	gene_1664	gm1.1336_g	scaffold_13	108484	108484	A	G	hom	30
exonic	gene_1668	gm1.1339_g	scaffold_13	115021	115021	C	T	hom	30
intergenic	gene_1671(dist=1261),gene_1672(dist=1510)	fgenesh1_kg.13_#_68_#_Locus864v1rpkm187.50(dist=1261),e_gw1.13.103.1(dist=1510)	scaffold_13	122729	122729	G	A	hom	30
intergenic	gene_1671(dist=1484),gene_1672(dist=1287)	fgenesh1_kg.13_#_68_#_Locus864v1rpkm187.50(dist=1484),e_gw1.13.103.1(dist=1287)	scaffold_13	122952	122952	A	G	hom	30
intergenic	gene_1671(dist=1493),gene_1672(dist=1278)	fgenesh1_kg.13_#_68_#_Locus864v1rpkm187.50(dist=1493),e_gw1.13.103.1(dist=1278)	scaffold_13	122961	122961	A	T	hom	30
intergenic	gene_1672(dist=1052),gene_1673(dist=1476)	e_gw1.13.103.1(dist=1052),gm1.1344_g(dist=1476)	scaffold_13	127321	127321	G	A	hom	30
upstream	gene_1673,gene_1674	gm1.1344_g,gw1.13.28.1	scaffold_13	130280	130280	G	A	hom	30
intronic	gene_1678	fgenesh1_kg.13_#_75_#_Locus2720v1rpkm41.41	scaffold_13	138926	138926	A	G	hom	30
intronic	gene_1678	fgenesh1_kg.13_#_75_#_Locus2720v1rpkm41.41	scaffold_13	138927	138927	T	G	hom	30
exonic	gene_1688	fgenesh1_kg.13_#_93_#_Locus1968v1rpkm66.58	scaffold_13	163132	163132	C	T	hom	30
downstream	gene_1704	e_gw1.13.170.1	scaffold_13	198595	198595	C	T	hom	30
intronic	gene_1704	e_gw1.13.170.1	scaffold_13	200513	200513	C	G	hom	30
intronic	gene_1716	e_gw1.13.32.1	scaffold_13	237058	237058	G	A	hom	30
intronic	gene_8140	e_gw1.130.3.1	scaffold_130	3274	3274	C	A	hom	30
upstream	gene_8141	CE63124_538	scaffold_130	6098	6098	T	C	hom	30
exonic	gene_8145	fgenesh1_kg.130_#_9_#_Locus5015v1rpkm12.55	scaffold_130	15167	15167	G	A	hom	30
upstream;downstream	gene_8146;gene_8145	CE63209_3309;fgenesh1_kg.130_#_9_#_Locus5015v1rpkm12.55	scaffold_130	15649	15649	G	T	hom	30
exonic	gene_8153	fgenesh1_kg.130_#_15_#_Locus910v1rpkm174.95	scaffold_130	35648	35648	C	T	hom	30
UTR5	gene_8154	CE64625_5743	scaffold_130	38059	38059	G	T	hom	30
exonic	gene_8156	e_gw1.130.12.1	scaffold_130	42638	42638	A	C	hom	30
exonic	gene_8156	e_gw1.130.12.1	scaffold_130	42803	42803	C	A	hom	30
exonic	gene_8157	fgenesh1_pg.130_#_14	scaffold_130	45638	45638	G	A	hom	30
intronic	gene_8157	fgenesh1_pg.130_#_14	scaffold_130	46327	46327	A	C	hom	30
exonic	gene_8163	estExt_fgenesh1_pg.C_1310001	scaffold_131	2772	2772	C	T	hom	30
intronic	gene_8173	estExt_Genewise1.C_1310029	scaffold_131	28470	28470	G	A	hom	30
upstream;downstream	gene_8174;gene_8173	estExt_fgenesh1_pm.C_1310010;estExt_Genewise1.C_1310029	scaffold_131	30693	30693	G	T	hom	30
intronic	gene_8174	estExt_fgenesh1_pm.C_1310010	scaffold_131	32935	32935	T	C	hom	30
downstream	gene_8182	fgenesh1_kg.131_#_15_#_Locus7650v1rpkm3.10	scaffold_131	49112	49112	C	T	hom	30
downstream	gene_8182	fgenesh1_kg.131_#_15_#_Locus7650v1rpkm3.10	scaffold_131	49139	49139	A	G	hom	30
downstream	gene_8182	fgenesh1_kg.131_#_15_#_Locus7650v1rpkm3.10	scaffold_131	49141	49141	G	T	hom	30
downstream	gene_8182	fgenesh1_kg.131_#_15_#_Locus7650v1rpkm3.10	scaffold_131	49195	49195	T	C	hom	30
exonic	gene_8192	estExt_Genewise1.C_1320016	scaffold_132	11257	11257	G	A	hom	30
exonic	gene_8212	gm1.6622_g	scaffold_132	54936	54936	G	A	hom	30
upstream	gene_8217	gw1.133.42.1	scaffold_133	2995	2995	C	T	hom	30
exonic	gene_8217	gw1.133.42.1	scaffold_133	5434	5434	G	T	hom	30
exonic	gene_8222	fgenesh1_kg.133_#_8_#_Locus441v1rpkm416.60	scaffold_133	15727	15727	T	C	hom	30
upstream	gene_8225	fgenesh1_kg.133_#_12_#_Locus1265v1rpkm118.36	scaffold_133	25627	25627	G	T	hom	30
intronic	gene_8226	estExt_fgenesh1_pg.C_1330011	scaffold_133	31143	31143	C	T	hom	30
intergenic	gene_8234(dist=1263),gene_8238(dist=1272)	estExt_Genewise1.C_1330044(dist=1263),CE67527_6442(dist=1272)	scaffold_133	52525	52525	C	T	hom	30
intergenic	gene_8234(dist=1264),gene_8238(dist=1271)	estExt_Genewise1.C_1330044(dist=1264),CE67527_6442(dist=1271)	scaffold_133	52526	52526	G	A	hom	30
exonic	gene_8238	CE67527_6442	scaffold_133	54204	54204	C	A	hom	30
intronic	gene_8239	estExt_fgenesh1_pg.C_1330019	scaffold_133	56919	56919	A	T	hom	30
intronic	gene_8239	estExt_fgenesh1_pg.C_1330019	scaffold_133	56922	56922	A	C	hom	30
intergenic	NONE(dist=NONE),gene_8242(dist=2540)	NONE(dist=NONE),CE68131_3301(dist=2540)	scaffold_134	166	166	C	A	hom	30
exonic	gene_8242	CE68131_3301	scaffold_134	5254	5254	G	C	hom	30
upstream;downstream	gene_8243;gene_8242	fgenesh1_pm.134_#_2;CE68131_3301	scaffold_134	7243	7243	C	G	hom	30
upstream;downstream	gene_8243;gene_8242	fgenesh1_pm.134_#_2;CE68131_3301	scaffold_134	7244	7244	T	G	hom	30
downstream	gene_8258	e_gw1.134.9.1	scaffold_134	51621	51621	T	G	hom	30
intergenic	gene_8265(dist=2235),gene_8266(dist=1428)	e_gw1.135.2.1(dist=2235),CE69175_899(dist=1428)	scaffold_135	8792	8792	C	T	hom	30
upstream	gene_8266	CE69175_899	scaffold_135	9275	9275	T	C	hom	30
upstream	gene_8269	estExt_Genemark1.C_1350003	scaffold_135	18266	18266	C	A	hom	30
exonic	gene_8272	estExt_Genewise1.C_1350015	scaffold_135	29694	29694	C	G	hom	30
intronic	gene_8275	estExt_fgenesh1_pm.C_1350008	scaffold_135	38059	38059	A	G	hom	30
downstream	gene_8277	e_gw1.135.36.1	scaffold_135	46946	46946	A	G	hom	30
exonic	gene_8278	e_gw1.135.1.1	scaffold_135	51345	51345	G	A	hom	30
intergenic	gene_8284(dist=1028),gene_8285(dist=15405)	fgenesh1_kg.136_#_3_#_Locus5564v1rpkm9.36(dist=1028),fgenesh1_pm.136_#_3(dist=15405)	scaffold_136	8678	8678	C	T	hom	30
intergenic	gene_8284(dist=7366),gene_8285(dist=9067)	fgenesh1_kg.136_#_3_#_Locus5564v1rpkm9.36(dist=7366),fgenesh1_pm.136_#_3(dist=9067)	scaffold_136	15016	15016	C	T	hom	30
intergenic	gene_8286(dist=2381),NONE(dist=NONE)	e_gw1.136.45.1(dist=2381),NONE(dist=NONE)	scaffold_136	29317	29317	A	G	hom	30
intergenic	gene_8286(dist=2384),NONE(dist=NONE)	e_gw1.136.45.1(dist=2384),NONE(dist=NONE)	scaffold_136	29320	29320	C	T	hom	30
intergenic	gene_8286(dist=2392),NONE(dist=NONE)	e_gw1.136.45.1(dist=2392),NONE(dist=NONE)	scaffold_136	29328	29328	A	G	hom	30
intergenic	gene_8286(dist=2395),NONE(dist=NONE)	e_gw1.136.45.1(dist=2395),NONE(dist=NONE)	scaffold_136	29331	29331	T	C	hom	30
intergenic	gene_8286(dist=2409),NONE(dist=NONE)	e_gw1.136.45.1(dist=2409),NONE(dist=NONE)	scaffold_136	29345	29345	G	A	hom	30
intergenic	gene_8286(dist=2413),NONE(dist=NONE)	e_gw1.136.45.1(dist=2413),NONE(dist=NONE)	scaffold_136	29349	29349	G	A	hom	30
intergenic	gene_8286(dist=2428),NONE(dist=NONE)	e_gw1.136.45.1(dist=2428),NONE(dist=NONE)	scaffold_136	29364	29364	C	T	hom	30
intergenic	gene_8286(dist=2429),NONE(dist=NONE)	e_gw1.136.45.1(dist=2429),NONE(dist=NONE)	scaffold_136	29365	29365	T	C	hom	30
intergenic	gene_8286(dist=2432),NONE(dist=NONE)	e_gw1.136.45.1(dist=2432),NONE(dist=NONE)	scaffold_136	29368	29368	T	C	hom	30
intergenic	gene_8286(dist=2434),NONE(dist=NONE)	e_gw1.136.45.1(dist=2434),NONE(dist=NONE)	scaffold_136	29370	29370	A	G	hom	30
intergenic	gene_8286(dist=2435),NONE(dist=NONE)	e_gw1.136.45.1(dist=2435),NONE(dist=NONE)	scaffold_136	29371	29371	T	C	hom	30
intergenic	gene_8286(dist=2440),NONE(dist=NONE)	e_gw1.136.45.1(dist=2440),NONE(dist=NONE)	scaffold_136	29376	29376	A	G	hom	30
intergenic	gene_8286(dist=2450),NONE(dist=NONE)	e_gw1.136.45.1(dist=2450),NONE(dist=NONE)	scaffold_136	29386	29386	A	G	hom	30
intergenic	gene_8286(dist=2451),NONE(dist=NONE)	e_gw1.136.45.1(dist=2451),NONE(dist=NONE)	scaffold_136	29387	29387	G	A	hom	30
intergenic	gene_8286(dist=2455),NONE(dist=NONE)	e_gw1.136.45.1(dist=2455),NONE(dist=NONE)	scaffold_136	29391	29391	A	G	hom	30
intergenic	gene_8286(dist=2470),NONE(dist=NONE)	e_gw1.136.45.1(dist=2470),NONE(dist=NONE)	scaffold_136	29406	29406	A	G	hom	30
intergenic	gene_8286(dist=2472),NONE(dist=NONE)	e_gw1.136.45.1(dist=2472),NONE(dist=NONE)	scaffold_136	29408	29408	A	G	hom	30
intergenic	gene_8286(dist=2474),NONE(dist=NONE)	e_gw1.136.45.1(dist=2474),NONE(dist=NONE)	scaffold_136	29410	29410	A	G	hom	30
intergenic	gene_8286(dist=2487),NONE(dist=NONE)	e_gw1.136.45.1(dist=2487),NONE(dist=NONE)	scaffold_136	29423	29423	T	C	hom	30
intergenic	gene_8286(dist=2488),NONE(dist=NONE)	e_gw1.136.45.1(dist=2488),NONE(dist=NONE)	scaffold_136	29424	29424	T	C	hom	30
intergenic	gene_8286(dist=2490),NONE(dist=NONE)	e_gw1.136.45.1(dist=2490),NONE(dist=NONE)	scaffold_136	29426	29426	T	C	hom	30
intergenic	gene_8286(dist=2497),NONE(dist=NONE)	e_gw1.136.45.1(dist=2497),NONE(dist=NONE)	scaffold_136	29433	29433	C	T	hom	30
intergenic	gene_8286(dist=2499),NONE(dist=NONE)	e_gw1.136.45.1(dist=2499),NONE(dist=NONE)	scaffold_136	29435	29435	A	G	hom	30
intergenic	gene_8286(dist=2505),NONE(dist=NONE)	e_gw1.136.45.1(dist=2505),NONE(dist=NONE)	scaffold_136	29441	29441	G	A	hom	30
intergenic	gene_8286(dist=2518),NONE(dist=NONE)	e_gw1.136.45.1(dist=2518),NONE(dist=NONE)	scaffold_136	29454	29454	A	G	hom	30
intergenic	gene_8286(dist=2528),NONE(dist=NONE)	e_gw1.136.45.1(dist=2528),NONE(dist=NONE)	scaffold_136	29464	29464	T	C	hom	30
intergenic	gene_8286(dist=2558),NONE(dist=NONE)	e_gw1.136.45.1(dist=2558),NONE(dist=NONE)	scaffold_136	29494	29494	A	G	hom	30
intergenic	gene_8286(dist=2560),NONE(dist=NONE)	e_gw1.136.45.1(dist=2560),NONE(dist=NONE)	scaffold_136	29496	29496	A	G	hom	30
intergenic	gene_8286(dist=2561),NONE(dist=NONE)	e_gw1.136.45.1(dist=2561),NONE(dist=NONE)	scaffold_136	29497	29497	G	A	hom	30
intergenic	gene_8286(dist=2569),NONE(dist=NONE)	e_gw1.136.45.1(dist=2569),NONE(dist=NONE)	scaffold_136	29505	29505	C	T	hom	30
intergenic	gene_8286(dist=2574),NONE(dist=NONE)	e_gw1.136.45.1(dist=2574),NONE(dist=NONE)	scaffold_136	29510	29510	T	C	hom	30
intergenic	gene_8286(dist=2579),NONE(dist=NONE)	e_gw1.136.45.1(dist=2579),NONE(dist=NONE)	scaffold_136	29515	29515	G	A	hom	30
intergenic	gene_8286(dist=2662),NONE(dist=NONE)	e_gw1.136.45.1(dist=2662),NONE(dist=NONE)	scaffold_136	29598	29598	T	C	hom	30
intergenic	gene_8286(dist=2664),NONE(dist=NONE)	e_gw1.136.45.1(dist=2664),NONE(dist=NONE)	scaffold_136	29600	29600	A	G	hom	30
intergenic	gene_8286(dist=2666),NONE(dist=NONE)	e_gw1.136.45.1(dist=2666),NONE(dist=NONE)	scaffold_136	29602	29602	A	G	hom	30
intergenic	gene_8286(dist=2689),NONE(dist=NONE)	e_gw1.136.45.1(dist=2689),NONE(dist=NONE)	scaffold_136	29625	29625	T	C	hom	30
intergenic	gene_8286(dist=2694),NONE(dist=NONE)	e_gw1.136.45.1(dist=2694),NONE(dist=NONE)	scaffold_136	29630	29630	T	C	hom	30
intergenic	gene_8286(dist=2697),NONE(dist=NONE)	e_gw1.136.45.1(dist=2697),NONE(dist=NONE)	scaffold_136	29633	29633	C	T	hom	30
intergenic	gene_8286(dist=2714),NONE(dist=NONE)	e_gw1.136.45.1(dist=2714),NONE(dist=NONE)	scaffold_136	29650	29650	C	T	hom	30
intergenic	gene_8286(dist=2720),NONE(dist=NONE)	e_gw1.136.45.1(dist=2720),NONE(dist=NONE)	scaffold_136	29656	29656	C	T	hom	30
intergenic	gene_8286(dist=2725),NONE(dist=NONE)	e_gw1.136.45.1(dist=2725),NONE(dist=NONE)	scaffold_136	29661	29661	A	G	hom	30
intergenic	gene_8286(dist=2727),NONE(dist=NONE)	e_gw1.136.45.1(dist=2727),NONE(dist=NONE)	scaffold_136	29663	29663	A	G	hom	30
intergenic	gene_8286(dist=2728),NONE(dist=NONE)	e_gw1.136.45.1(dist=2728),NONE(dist=NONE)	scaffold_136	29664	29664	T	A	hom	30
intergenic	gene_8286(dist=2741),NONE(dist=NONE)	e_gw1.136.45.1(dist=2741),NONE(dist=NONE)	scaffold_136	29677	29677	A	G	hom	30
intergenic	gene_8286(dist=2751),NONE(dist=NONE)	e_gw1.136.45.1(dist=2751),NONE(dist=NONE)	scaffold_136	29687	29687	A	G	hom	30
intergenic	gene_8286(dist=2772),NONE(dist=NONE)	e_gw1.136.45.1(dist=2772),NONE(dist=NONE)	scaffold_136	29708	29708	T	C	hom	30
intergenic	gene_8286(dist=2776),NONE(dist=NONE)	e_gw1.136.45.1(dist=2776),NONE(dist=NONE)	scaffold_136	29712	29712	T	C	hom	30
intergenic	gene_8286(dist=2779),NONE(dist=NONE)	e_gw1.136.45.1(dist=2779),NONE(dist=NONE)	scaffold_136	29715	29715	A	G	hom	30
intergenic	gene_8286(dist=2788),NONE(dist=NONE)	e_gw1.136.45.1(dist=2788),NONE(dist=NONE)	scaffold_136	29724	29724	T	C	hom	30
intergenic	gene_8286(dist=2790),NONE(dist=NONE)	e_gw1.136.45.1(dist=2790),NONE(dist=NONE)	scaffold_136	29726	29726	A	G	hom	30
intergenic	gene_8286(dist=2798),NONE(dist=NONE)	e_gw1.136.45.1(dist=2798),NONE(dist=NONE)	scaffold_136	29734	29734	C	T	hom	30
intergenic	gene_8286(dist=2799),NONE(dist=NONE)	e_gw1.136.45.1(dist=2799),NONE(dist=NONE)	scaffold_136	29735	29735	A	G	hom	30
intergenic	gene_8286(dist=2800),NONE(dist=NONE)	e_gw1.136.45.1(dist=2800),NONE(dist=NONE)	scaffold_136	29736	29736	G	A	hom	30
intergenic	gene_8286(dist=2802),NONE(dist=NONE)	e_gw1.136.45.1(dist=2802),NONE(dist=NONE)	scaffold_136	29738	29738	G	A	hom	30
intergenic	gene_8286(dist=2805),NONE(dist=NONE)	e_gw1.136.45.1(dist=2805),NONE(dist=NONE)	scaffold_136	29741	29741	G	A	hom	30
intergenic	gene_8286(dist=2810),NONE(dist=NONE)	e_gw1.136.45.1(dist=2810),NONE(dist=NONE)	scaffold_136	29746	29746	T	C	hom	30
intergenic	gene_8286(dist=2814),NONE(dist=NONE)	e_gw1.136.45.1(dist=2814),NONE(dist=NONE)	scaffold_136	29750	29750	A	G	hom	30
intergenic	gene_8286(dist=2826),NONE(dist=NONE)	e_gw1.136.45.1(dist=2826),NONE(dist=NONE)	scaffold_136	29762	29762	A	G	hom	30
intergenic	gene_8286(dist=2830),NONE(dist=NONE)	e_gw1.136.45.1(dist=2830),NONE(dist=NONE)	scaffold_136	29766	29766	A	G	hom	30
intergenic	gene_8286(dist=2837),NONE(dist=NONE)	e_gw1.136.45.1(dist=2837),NONE(dist=NONE)	scaffold_136	29773	29773	C	T	hom	30
intergenic	gene_8286(dist=2850),NONE(dist=NONE)	e_gw1.136.45.1(dist=2850),NONE(dist=NONE)	scaffold_136	29786	29786	T	G	hom	30
intergenic	gene_8286(dist=2855),NONE(dist=NONE)	e_gw1.136.45.1(dist=2855),NONE(dist=NONE)	scaffold_136	29791	29791	C	T	hom	30
intergenic	gene_8286(dist=2857),NONE(dist=NONE)	e_gw1.136.45.1(dist=2857),NONE(dist=NONE)	scaffold_136	29793	29793	C	T	hom	30
intergenic	gene_8286(dist=2862),NONE(dist=NONE)	e_gw1.136.45.1(dist=2862),NONE(dist=NONE)	scaffold_136	29798	29798	G	A	hom	30
intergenic	gene_8286(dist=2873),NONE(dist=NONE)	e_gw1.136.45.1(dist=2873),NONE(dist=NONE)	scaffold_136	29809	29809	A	G	hom	30
intergenic	gene_8286(dist=2877),NONE(dist=NONE)	e_gw1.136.45.1(dist=2877),NONE(dist=NONE)	scaffold_136	29813	29813	T	C	hom	30
intergenic	gene_8286(dist=2886),NONE(dist=NONE)	e_gw1.136.45.1(dist=2886),NONE(dist=NONE)	scaffold_136	29822	29822	C	T	hom	30
intergenic	gene_8286(dist=2888),NONE(dist=NONE)	e_gw1.136.45.1(dist=2888),NONE(dist=NONE)	scaffold_136	29824	29824	T	C	hom	30
intergenic	gene_8286(dist=2932),NONE(dist=NONE)	e_gw1.136.45.1(dist=2932),NONE(dist=NONE)	scaffold_136	29868	29868	T	C	hom	30
intergenic	gene_8286(dist=2935),NONE(dist=NONE)	e_gw1.136.45.1(dist=2935),NONE(dist=NONE)	scaffold_136	29871	29871	T	C	hom	30
intergenic	gene_8286(dist=2953),NONE(dist=NONE)	e_gw1.136.45.1(dist=2953),NONE(dist=NONE)	scaffold_136	29889	29889	C	T	hom	30
intergenic	gene_8286(dist=2955),NONE(dist=NONE)	e_gw1.136.45.1(dist=2955),NONE(dist=NONE)	scaffold_136	29891	29891	A	G	hom	30
intergenic	gene_8286(dist=2960),NONE(dist=NONE)	e_gw1.136.45.1(dist=2960),NONE(dist=NONE)	scaffold_136	29896	29896	A	G	hom	30
intergenic	gene_8286(dist=2962),NONE(dist=NONE)	e_gw1.136.45.1(dist=2962),NONE(dist=NONE)	scaffold_136	29898	29898	A	G	hom	30
intergenic	gene_8286(dist=2964),NONE(dist=NONE)	e_gw1.136.45.1(dist=2964),NONE(dist=NONE)	scaffold_136	29900	29900	A	G	hom	30
intergenic	gene_8286(dist=2967),NONE(dist=NONE)	e_gw1.136.45.1(dist=2967),NONE(dist=NONE)	scaffold_136	29903	29903	C	G	hom	30
intergenic	gene_8286(dist=2969),NONE(dist=NONE)	e_gw1.136.45.1(dist=2969),NONE(dist=NONE)	scaffold_136	29905	29905	A	G	hom	30
intergenic	gene_8286(dist=2970),NONE(dist=NONE)	e_gw1.136.45.1(dist=2970),NONE(dist=NONE)	scaffold_136	29906	29906	A	T	hom	30
intergenic	gene_8286(dist=2971),NONE(dist=NONE)	e_gw1.136.45.1(dist=2971),NONE(dist=NONE)	scaffold_136	29907	29907	A	T	hom	30
intergenic	gene_8286(dist=2993),NONE(dist=NONE)	e_gw1.136.45.1(dist=2993),NONE(dist=NONE)	scaffold_136	29929	29929	A	G	hom	30
intergenic	gene_8286(dist=2994),NONE(dist=NONE)	e_gw1.136.45.1(dist=2994),NONE(dist=NONE)	scaffold_136	29930	29930	T	C	hom	30
intergenic	gene_8286(dist=2996),NONE(dist=NONE)	e_gw1.136.45.1(dist=2996),NONE(dist=NONE)	scaffold_136	29932	29932	G	A	hom	30
intergenic	gene_8286(dist=3013),NONE(dist=NONE)	e_gw1.136.45.1(dist=3013),NONE(dist=NONE)	scaffold_136	29949	29949	G	A	hom	30
intergenic	gene_8286(dist=3044),NONE(dist=NONE)	e_gw1.136.45.1(dist=3044),NONE(dist=NONE)	scaffold_136	29980	29980	T	C	hom	30
intergenic	gene_8286(dist=3049),NONE(dist=NONE)	e_gw1.136.45.1(dist=3049),NONE(dist=NONE)	scaffold_136	29985	29985	C	T	hom	30
intergenic	gene_8286(dist=3051),NONE(dist=NONE)	e_gw1.136.45.1(dist=3051),NONE(dist=NONE)	scaffold_136	29987	29987	G	A	hom	30
intergenic	gene_8286(dist=3063),NONE(dist=NONE)	e_gw1.136.45.1(dist=3063),NONE(dist=NONE)	scaffold_136	29999	29999	T	C	hom	30
intergenic	gene_8286(dist=3084),NONE(dist=NONE)	e_gw1.136.45.1(dist=3084),NONE(dist=NONE)	scaffold_136	30020	30020	T	C	hom	30
intergenic	gene_8286(dist=3086),NONE(dist=NONE)	e_gw1.136.45.1(dist=3086),NONE(dist=NONE)	scaffold_136	30022	30022	A	G	hom	30
intergenic	gene_8286(dist=3088),NONE(dist=NONE)	e_gw1.136.45.1(dist=3088),NONE(dist=NONE)	scaffold_136	30024	30024	A	G	hom	30
intergenic	gene_8286(dist=3097),NONE(dist=NONE)	e_gw1.136.45.1(dist=3097),NONE(dist=NONE)	scaffold_136	30033	30033	T	G	hom	30
intergenic	gene_8286(dist=3102),NONE(dist=NONE)	e_gw1.136.45.1(dist=3102),NONE(dist=NONE)	scaffold_136	30038	30038	G	A	hom	30
intergenic	gene_8286(dist=3114),NONE(dist=NONE)	e_gw1.136.45.1(dist=3114),NONE(dist=NONE)	scaffold_136	30050	30050	C	T	hom	30
intergenic	gene_8286(dist=3116),NONE(dist=NONE)	e_gw1.136.45.1(dist=3116),NONE(dist=NONE)	scaffold_136	30052	30052	C	T	hom	30
intergenic	gene_8286(dist=3119),NONE(dist=NONE)	e_gw1.136.45.1(dist=3119),NONE(dist=NONE)	scaffold_136	30055	30055	C	T	hom	30
intergenic	gene_8286(dist=3130),NONE(dist=NONE)	e_gw1.136.45.1(dist=3130),NONE(dist=NONE)	scaffold_136	30066	30066	T	C	hom	30
intergenic	gene_8286(dist=3137),NONE(dist=NONE)	e_gw1.136.45.1(dist=3137),NONE(dist=NONE)	scaffold_136	30073	30073	T	C	hom	30
intergenic	gene_8286(dist=3143),NONE(dist=NONE)	e_gw1.136.45.1(dist=3143),NONE(dist=NONE)	scaffold_136	30079	30079	A	G	hom	30
intergenic	gene_8286(dist=3158),NONE(dist=NONE)	e_gw1.136.45.1(dist=3158),NONE(dist=NONE)	scaffold_136	30094	30094	T	C	hom	30
intergenic	gene_8286(dist=3161),NONE(dist=NONE)	e_gw1.136.45.1(dist=3161),NONE(dist=NONE)	scaffold_136	30097	30097	C	T	hom	30
intergenic	gene_8286(dist=3165),NONE(dist=NONE)	e_gw1.136.45.1(dist=3165),NONE(dist=NONE)	scaffold_136	30101	30101	C	T	hom	30
intergenic	gene_8286(dist=3171),NONE(dist=NONE)	e_gw1.136.45.1(dist=3171),NONE(dist=NONE)	scaffold_136	30107	30107	C	T	hom	30
intergenic	gene_8286(dist=3175),NONE(dist=NONE)	e_gw1.136.45.1(dist=3175),NONE(dist=NONE)	scaffold_136	30111	30111	A	G	hom	30
intergenic	gene_8286(dist=3179),NONE(dist=NONE)	e_gw1.136.45.1(dist=3179),NONE(dist=NONE)	scaffold_136	30115	30115	G	A	hom	30
intergenic	gene_8286(dist=3185),NONE(dist=NONE)	e_gw1.136.45.1(dist=3185),NONE(dist=NONE)	scaffold_136	30121	30121	G	A	hom	30
intergenic	gene_8286(dist=3186),NONE(dist=NONE)	e_gw1.136.45.1(dist=3186),NONE(dist=NONE)	scaffold_136	30122	30122	G	A	hom	30
intergenic	gene_8286(dist=3192),NONE(dist=NONE)	e_gw1.136.45.1(dist=3192),NONE(dist=NONE)	scaffold_136	30128	30128	T	C	hom	30
intergenic	gene_8286(dist=3198),NONE(dist=NONE)	e_gw1.136.45.1(dist=3198),NONE(dist=NONE)	scaffold_136	30134	30134	A	G	hom	30
intergenic	gene_8286(dist=3201),NONE(dist=NONE)	e_gw1.136.45.1(dist=3201),NONE(dist=NONE)	scaffold_136	30137	30137	A	G	hom	30
intergenic	gene_8286(dist=3216),NONE(dist=NONE)	e_gw1.136.45.1(dist=3216),NONE(dist=NONE)	scaffold_136	30152	30152	C	T	hom	30
intergenic	gene_8286(dist=3226),NONE(dist=NONE)	e_gw1.136.45.1(dist=3226),NONE(dist=NONE)	scaffold_136	30162	30162	A	G	hom	30
intergenic	gene_8286(dist=3235),NONE(dist=NONE)	e_gw1.136.45.1(dist=3235),NONE(dist=NONE)	scaffold_136	30171	30171	C	T	hom	30
intergenic	gene_8286(dist=3247),NONE(dist=NONE)	e_gw1.136.45.1(dist=3247),NONE(dist=NONE)	scaffold_136	30183	30183	A	G	hom	30
intergenic	gene_8286(dist=3248),NONE(dist=NONE)	e_gw1.136.45.1(dist=3248),NONE(dist=NONE)	scaffold_136	30184	30184	T	C	hom	30
intergenic	gene_8286(dist=3252),NONE(dist=NONE)	e_gw1.136.45.1(dist=3252),NONE(dist=NONE)	scaffold_136	30188	30188	G	A	hom	30
intergenic	gene_8286(dist=3257),NONE(dist=NONE)	e_gw1.136.45.1(dist=3257),NONE(dist=NONE)	scaffold_136	30193	30193	C	T	hom	30
intergenic	gene_8286(dist=3267),NONE(dist=NONE)	e_gw1.136.45.1(dist=3267),NONE(dist=NONE)	scaffold_136	30203	30203	C	T	hom	30
intergenic	gene_8286(dist=3268),NONE(dist=NONE)	e_gw1.136.45.1(dist=3268),NONE(dist=NONE)	scaffold_136	30204	30204	C	T	hom	30
intergenic	gene_8286(dist=3270),NONE(dist=NONE)	e_gw1.136.45.1(dist=3270),NONE(dist=NONE)	scaffold_136	30206	30206	C	T	hom	30
intergenic	gene_8286(dist=3276),NONE(dist=NONE)	e_gw1.136.45.1(dist=3276),NONE(dist=NONE)	scaffold_136	30212	30212	A	G	hom	30
intergenic	gene_8286(dist=3277),NONE(dist=NONE)	e_gw1.136.45.1(dist=3277),NONE(dist=NONE)	scaffold_136	30213	30213	T	C	hom	30
intergenic	gene_8286(dist=3289),NONE(dist=NONE)	e_gw1.136.45.1(dist=3289),NONE(dist=NONE)	scaffold_136	30225	30225	G	A	hom	30
intergenic	gene_8286(dist=3295),NONE(dist=NONE)	e_gw1.136.45.1(dist=3295),NONE(dist=NONE)	scaffold_136	30231	30231	G	A	hom	30
intergenic	gene_8286(dist=3299),NONE(dist=NONE)	e_gw1.136.45.1(dist=3299),NONE(dist=NONE)	scaffold_136	30235	30235	G	A	hom	30
intergenic	gene_8286(dist=3309),NONE(dist=NONE)	e_gw1.136.45.1(dist=3309),NONE(dist=NONE)	scaffold_136	30245	30245	C	T	hom	30
intergenic	gene_8286(dist=3311),NONE(dist=NONE)	e_gw1.136.45.1(dist=3311),NONE(dist=NONE)	scaffold_136	30247	30247	G	A	hom	30
intergenic	gene_8286(dist=3315),NONE(dist=NONE)	e_gw1.136.45.1(dist=3315),NONE(dist=NONE)	scaffold_136	30251	30251	A	G	hom	30
intergenic	gene_8286(dist=3316),NONE(dist=NONE)	e_gw1.136.45.1(dist=3316),NONE(dist=NONE)	scaffold_136	30252	30252	T	C	hom	30
intergenic	gene_8286(dist=3327),NONE(dist=NONE)	e_gw1.136.45.1(dist=3327),NONE(dist=NONE)	scaffold_136	30263	30263	G	A	hom	30
intergenic	gene_8286(dist=3342),NONE(dist=NONE)	e_gw1.136.45.1(dist=3342),NONE(dist=NONE)	scaffold_136	30278	30278	T	C	hom	30
intergenic	gene_8286(dist=3345),NONE(dist=NONE)	e_gw1.136.45.1(dist=3345),NONE(dist=NONE)	scaffold_136	30281	30281	A	T	hom	30
intergenic	gene_8286(dist=3347),NONE(dist=NONE)	e_gw1.136.45.1(dist=3347),NONE(dist=NONE)	scaffold_136	30283	30283	G	A	hom	30
intergenic	gene_8286(dist=3353),NONE(dist=NONE)	e_gw1.136.45.1(dist=3353),NONE(dist=NONE)	scaffold_136	30289	30289	A	G	hom	30
intergenic	gene_8286(dist=3354),NONE(dist=NONE)	e_gw1.136.45.1(dist=3354),NONE(dist=NONE)	scaffold_136	30290	30290	T	C	hom	30
intergenic	gene_8286(dist=3355),NONE(dist=NONE)	e_gw1.136.45.1(dist=3355),NONE(dist=NONE)	scaffold_136	30291	30291	C	T	hom	30
intergenic	gene_8286(dist=3358),NONE(dist=NONE)	e_gw1.136.45.1(dist=3358),NONE(dist=NONE)	scaffold_136	30294	30294	T	C	hom	30
intergenic	gene_8286(dist=3365),NONE(dist=NONE)	e_gw1.136.45.1(dist=3365),NONE(dist=NONE)	scaffold_136	30301	30301	G	A	hom	30
intergenic	gene_8286(dist=3366),NONE(dist=NONE)	e_gw1.136.45.1(dist=3366),NONE(dist=NONE)	scaffold_136	30302	30302	T	C	hom	30
intergenic	gene_8286(dist=3367),NONE(dist=NONE)	e_gw1.136.45.1(dist=3367),NONE(dist=NONE)	scaffold_136	30303	30303	G	A	hom	30
intergenic	gene_8286(dist=3374),NONE(dist=NONE)	e_gw1.136.45.1(dist=3374),NONE(dist=NONE)	scaffold_136	30310	30310	G	A	hom	30
intergenic	gene_8286(dist=3378),NONE(dist=NONE)	e_gw1.136.45.1(dist=3378),NONE(dist=NONE)	scaffold_136	30314	30314	C	T	hom	30
intergenic	gene_8286(dist=3380),NONE(dist=NONE)	e_gw1.136.45.1(dist=3380),NONE(dist=NONE)	scaffold_136	30316	30316	A	G	hom	30
intergenic	gene_8286(dist=3384),NONE(dist=NONE)	e_gw1.136.45.1(dist=3384),NONE(dist=NONE)	scaffold_136	30320	30320	G	A	hom	30
intergenic	gene_8286(dist=3397),NONE(dist=NONE)	e_gw1.136.45.1(dist=3397),NONE(dist=NONE)	scaffold_136	30333	30333	G	A	hom	30
intergenic	gene_8286(dist=3402),NONE(dist=NONE)	e_gw1.136.45.1(dist=3402),NONE(dist=NONE)	scaffold_136	30338	30338	G	A	hom	30
intergenic	gene_8286(dist=3404),NONE(dist=NONE)	e_gw1.136.45.1(dist=3404),NONE(dist=NONE)	scaffold_136	30340	30340	G	A	hom	30
intergenic	gene_8286(dist=3407),NONE(dist=NONE)	e_gw1.136.45.1(dist=3407),NONE(dist=NONE)	scaffold_136	30343	30343	G	A	hom	30
intergenic	gene_8286(dist=3413),NONE(dist=NONE)	e_gw1.136.45.1(dist=3413),NONE(dist=NONE)	scaffold_136	30349	30349	A	G	hom	30
intergenic	gene_8286(dist=3422),NONE(dist=NONE)	e_gw1.136.45.1(dist=3422),NONE(dist=NONE)	scaffold_136	30358	30358	G	A	hom	30
intergenic	gene_8286(dist=3425),NONE(dist=NONE)	e_gw1.136.45.1(dist=3425),NONE(dist=NONE)	scaffold_136	30361	30361	T	C	hom	30
intergenic	gene_8286(dist=3427),NONE(dist=NONE)	e_gw1.136.45.1(dist=3427),NONE(dist=NONE)	scaffold_136	30363	30363	A	G	hom	30
intergenic	gene_8286(dist=3432),NONE(dist=NONE)	e_gw1.136.45.1(dist=3432),NONE(dist=NONE)	scaffold_136	30368	30368	T	C	hom	30
intergenic	gene_8286(dist=3444),NONE(dist=NONE)	e_gw1.136.45.1(dist=3444),NONE(dist=NONE)	scaffold_136	30380	30380	C	T	hom	30
intergenic	gene_8286(dist=3451),NONE(dist=NONE)	e_gw1.136.45.1(dist=3451),NONE(dist=NONE)	scaffold_136	30387	30387	C	T	hom	30
intergenic	gene_8286(dist=3461),NONE(dist=NONE)	e_gw1.136.45.1(dist=3461),NONE(dist=NONE)	scaffold_136	30397	30397	A	G	hom	30
intergenic	gene_8286(dist=3472),NONE(dist=NONE)	e_gw1.136.45.1(dist=3472),NONE(dist=NONE)	scaffold_136	30408	30408	C	T	hom	30
intergenic	gene_8286(dist=3476),NONE(dist=NONE)	e_gw1.136.45.1(dist=3476),NONE(dist=NONE)	scaffold_136	30412	30412	C	G	hom	30
intergenic	gene_8286(dist=3477),NONE(dist=NONE)	e_gw1.136.45.1(dist=3477),NONE(dist=NONE)	scaffold_136	30413	30413	C	T	hom	30
intergenic	gene_8286(dist=3481),NONE(dist=NONE)	e_gw1.136.45.1(dist=3481),NONE(dist=NONE)	scaffold_136	30417	30417	A	G	hom	30
intergenic	gene_8286(dist=3500),NONE(dist=NONE)	e_gw1.136.45.1(dist=3500),NONE(dist=NONE)	scaffold_136	30436	30436	T	C	hom	30
intergenic	gene_8286(dist=3506),NONE(dist=NONE)	e_gw1.136.45.1(dist=3506),NONE(dist=NONE)	scaffold_136	30442	30442	T	C	hom	30
intergenic	gene_8286(dist=3508),NONE(dist=NONE)	e_gw1.136.45.1(dist=3508),NONE(dist=NONE)	scaffold_136	30444	30444	A	G	hom	30
intergenic	gene_8286(dist=3527),NONE(dist=NONE)	e_gw1.136.45.1(dist=3527),NONE(dist=NONE)	scaffold_136	30463	30463	G	A	hom	30
intergenic	gene_8286(dist=3537),NONE(dist=NONE)	e_gw1.136.45.1(dist=3537),NONE(dist=NONE)	scaffold_136	30473	30473	A	G	hom	30
intergenic	gene_8286(dist=3540),NONE(dist=NONE)	e_gw1.136.45.1(dist=3540),NONE(dist=NONE)	scaffold_136	30476	30476	A	G	hom	30
intergenic	gene_8286(dist=3544),NONE(dist=NONE)	e_gw1.136.45.1(dist=3544),NONE(dist=NONE)	scaffold_136	30480	30480	T	C	hom	30
intergenic	gene_8286(dist=3550),NONE(dist=NONE)	e_gw1.136.45.1(dist=3550),NONE(dist=NONE)	scaffold_136	30486	30486	A	G	hom	30
intergenic	gene_8286(dist=3555),NONE(dist=NONE)	e_gw1.136.45.1(dist=3555),NONE(dist=NONE)	scaffold_136	30491	30491	T	C	hom	30
intergenic	gene_8286(dist=3557),NONE(dist=NONE)	e_gw1.136.45.1(dist=3557),NONE(dist=NONE)	scaffold_136	30493	30493	C	T	hom	30
intergenic	gene_8286(dist=3558),NONE(dist=NONE)	e_gw1.136.45.1(dist=3558),NONE(dist=NONE)	scaffold_136	30494	30494	A	G	hom	30
intergenic	gene_8286(dist=3565),NONE(dist=NONE)	e_gw1.136.45.1(dist=3565),NONE(dist=NONE)	scaffold_136	30501	30501	T	C	hom	30
intergenic	gene_8286(dist=3571),NONE(dist=NONE)	e_gw1.136.45.1(dist=3571),NONE(dist=NONE)	scaffold_136	30507	30507	C	T	hom	30
intergenic	gene_8286(dist=3573),NONE(dist=NONE)	e_gw1.136.45.1(dist=3573),NONE(dist=NONE)	scaffold_136	30509	30509	G	A	hom	30
intergenic	gene_8286(dist=3576),NONE(dist=NONE)	e_gw1.136.45.1(dist=3576),NONE(dist=NONE)	scaffold_136	30512	30512	G	A	hom	30
intergenic	gene_8286(dist=3581),NONE(dist=NONE)	e_gw1.136.45.1(dist=3581),NONE(dist=NONE)	scaffold_136	30517	30517	A	G	hom	30
intergenic	gene_8286(dist=3606),NONE(dist=NONE)	e_gw1.136.45.1(dist=3606),NONE(dist=NONE)	scaffold_136	30542	30542	T	C	hom	30
intergenic	gene_8286(dist=7435),NONE(dist=NONE)	e_gw1.136.45.1(dist=7435),NONE(dist=NONE)	scaffold_136	34371	34371	A	C	hom	30
intergenic	gene_8286(dist=9602),NONE(dist=NONE)	e_gw1.136.45.1(dist=9602),NONE(dist=NONE)	scaffold_136	36538	36538	A	T	hom	30
intergenic	gene_8286(dist=20419),NONE(dist=NONE)	e_gw1.136.45.1(dist=20419),NONE(dist=NONE)	scaffold_136	47355	47355	A	C	hom	30
intergenic	gene_8286(dist=22440),NONE(dist=NONE)	e_gw1.136.45.1(dist=22440),NONE(dist=NONE)	scaffold_136	49376	49376	G	A	hom	30
intergenic	gene_8286(dist=27015),NONE(dist=NONE)	e_gw1.136.45.1(dist=27015),NONE(dist=NONE)	scaffold_136	53951	53951	G	A	hom	30
intergenic	gene_8286(dist=28800),NONE(dist=NONE)	e_gw1.136.45.1(dist=28800),NONE(dist=NONE)	scaffold_136	55736	55736	T	A	hom	30
intergenic	gene_8286(dist=31072),NONE(dist=NONE)	e_gw1.136.45.1(dist=31072),NONE(dist=NONE)	scaffold_136	58008	58008	C	T	hom	30
exonic	gene_8289	estExt_Genemark1.C_1370002	scaffold_137	7306	7306	T	C	hom	30
UTR3	gene_8318	fgenesh1_kg.138_#_11_#_Locus8332v1rpkm2.41	scaffold_138	37005	37005	G	A	hom	30
UTR3	gene_8318	fgenesh1_kg.138_#_11_#_Locus8332v1rpkm2.41	scaffold_138	37007	37007	T	A	hom	30
UTR3	gene_8318	fgenesh1_kg.138_#_11_#_Locus8332v1rpkm2.41	scaffold_138	37008	37008	G	A	hom	30
exonic	gene_8334	CE72363_12836	scaffold_139	28201	28201	G	C	hom	30
exonic	gene_1733	CE72914_46826	scaffold_14	7364	7364	T	A	hom	30
intronic	gene_1736	estExt_Genemark1.C_140004	scaffold_14	16954	16954	G	A	hom	30
UTR3	gene_1737	fgenesh1_kg.14_#_7_#_Locus2087v1rpkm61.52	scaffold_14	18731	18731	G	A	hom	30
exonic	gene_1742	fgenesh1_kg.14_#_19_#_Locus11965v1rpkm0.94	scaffold_14	35618	35618	C	A	hom	30
exonic	gene_1742	fgenesh1_kg.14_#_19_#_Locus11965v1rpkm0.94	scaffold_14	35621	35621	G	A	hom	30
exonic	gene_1742	fgenesh1_kg.14_#_19_#_Locus11965v1rpkm0.94	scaffold_14	35622	35622	G	A	hom	30
UTR3	gene_1742	fgenesh1_kg.14_#_19_#_Locus11965v1rpkm0.94	scaffold_14	35639	35639	G	A	hom	30
UTR3	gene_1742	fgenesh1_kg.14_#_19_#_Locus11965v1rpkm0.94	scaffold_14	35642	35642	C	A	hom	30
UTR3	gene_1742	fgenesh1_kg.14_#_19_#_Locus11965v1rpkm0.94	scaffold_14	35643	35643	C	A	hom	30
upstream;downstream	gene_1741;gene_1742	estExt_Genewise1Plus.C_140013;fgenesh1_kg.14_#_19_#_Locus11965v1rpkm0.94	scaffold_14	35644	35644	T	A	hom	30
upstream;downstream	gene_1741;gene_1742	estExt_Genewise1Plus.C_140013;fgenesh1_kg.14_#_19_#_Locus11965v1rpkm0.94	scaffold_14	35653	35653	T	A	hom	30
upstream;downstream	gene_1741;gene_1742	estExt_Genewise1Plus.C_140013;fgenesh1_kg.14_#_19_#_Locus11965v1rpkm0.94	scaffold_14	35654	35654	C	A	hom	30
downstream	gene_1751,gene_1752	e_gw1.14.131.1,gm1.1410_g	scaffold_14	64873	64873	G	A	hom	30
exonic	gene_1752	gm1.1410_g	scaffold_14	69236	69236	A	C	hom	30
downstream	gene_1756,gene_1757	estExt_Genewise1.C_140047,estExt_fgenesh1_pm.C_140011	scaffold_14	82536	82536	T	C	hom	30
exonic	gene_1760	estExt_Genewise1.C_140051	scaffold_14	97775	97775	A	G	hom	30
intronic	gene_1764	fgenesh1_kg.14_#_46_#_Locus1406v1rpkm103.57	scaffold_14	111946	111946	T	C	hom	30
upstream;downstream	gene_1768;gene_1771	fgenesh1_kg.14_#_50_#_Locus9772v2rpkm0.49;estExt_Genewise1Plus.C_140062	scaffold_14	120217	120217	G	A	hom	30
upstream;downstream	gene_1768;gene_1771	fgenesh1_kg.14_#_50_#_Locus9772v2rpkm0.49;estExt_Genewise1Plus.C_140062	scaffold_14	120237	120237	T	C	hom	30
upstream;downstream	gene_1768;gene_1771	fgenesh1_kg.14_#_50_#_Locus9772v2rpkm0.49;estExt_Genewise1Plus.C_140062	scaffold_14	120641	120641	A	T	hom	30
exonic	gene_1773	estExt_Genemark1.C_140039	scaffold_14	135213	135213	G	C	hom	30
intronic	gene_1774	gm1.1428_g	scaffold_14	138599	138599	G	A	hom	30
downstream	gene_1775,gene_1776	estExt_Genemark1.C_140042,gm1.1429_g	scaffold_14	141201	141201	A	T	hom	30
exonic	gene_1776	estExt_Genemark1.C_140042	scaffold_14	141851	141851	A	C	hom	30
exonic	gene_1791	CE75289_534	scaffold_14	169492	169492	C	T	hom	30
intronic	gene_1794	fgenesh1_kg.14_#_71_#_Locus1543v1rpkm92.28	scaffold_14	172330	172330	T	G	hom	30
intronic	gene_1794	fgenesh1_kg.14_#_71_#_Locus1543v1rpkm92.28	scaffold_14	174264	174264	A	G	hom	30
UTR3	gene_1806	fgenesh1_kg.14_#_80_#_Locus5711v1rpkm8.57	scaffold_14	195936	195936	C	T	hom	30
UTR3	gene_1806	fgenesh1_kg.14_#_80_#_Locus5711v1rpkm8.57	scaffold_14	195938	195938	C	T	hom	30
exonic	gene_1814	fgenesh1_kg.14_#_87_#_Locus2376v2rpkm9.57	scaffold_14	227239	227239	C	T	hom	30
intergenic	gene_1814(dist=2323),gene_1815(dist=5858)	fgenesh1_kg.14_#_87_#_Locus2376v2rpkm9.57(dist=2323),fgenesh1_kg.14_#_90_#_Locus979v3rpkm3.75_PRE(dist=5858)	scaffold_14	231065	231065	G	A	hom	30
intergenic	gene_1814(dist=6772),gene_1815(dist=1409)	fgenesh1_kg.14_#_87_#_Locus2376v2rpkm9.57(dist=6772),fgenesh1_kg.14_#_90_#_Locus979v3rpkm3.75_PRE(dist=1409)	scaffold_14	235514	235514	A	C	hom	30
intergenic	gene_1814(dist=7043),gene_1815(dist=1138)	fgenesh1_kg.14_#_87_#_Locus2376v2rpkm9.57(dist=7043),fgenesh1_kg.14_#_90_#_Locus979v3rpkm3.75_PRE(dist=1138)	scaffold_14	235785	235785	G	A	hom	30
upstream	gene_8359	e_gw1.140.11.1	scaffold_140	38664	38664	C	T	hom	30
upstream	gene_8359	e_gw1.140.11.1	scaffold_140	38680	38680	A	G	hom	30
upstream	gene_8359	e_gw1.140.11.1	scaffold_140	38718	38718	A	G	hom	30
upstream	gene_8359	e_gw1.140.11.1	scaffold_140	38778	38778	C	T	hom	30
upstream	gene_8359	e_gw1.140.11.1	scaffold_140	38779	38779	A	G	hom	30
exonic	gene_8374	estExt_Genewise1Plus.C_1410010	scaffold_141	9392	9392	C	T	hom	30
exonic	gene_8390	e_gw1.141.43.1	scaffold_141	32645	32645	T	C	hom	30
UTR5	gene_8394	fgenesh1_kg.141_#_23_#_Locus1111v1rpkm139.06	scaffold_141	41496	41496	T	C	hom	30
upstream	gene_8397	CE79171_471	scaffold_141	46083	46083	T	C	hom	30
exonic	gene_8404	fgenesh1_kg.142_#_4_#_Locus5264v1rpkm11.02	scaffold_142	6761	6761	T	C	hom	30
UTR3	gene_8404	fgenesh1_kg.142_#_4_#_Locus5264v1rpkm11.02	scaffold_142	10952	10952	T	A	hom	30
upstream;downstream	gene_8405,gene_8406;gene_8407	CE79435_1231,fgenesh1_kg.142_#_7_#_Locus1045v1rpkm148.88;fgenesh1_kg.142_#_8_#_Locus4318v1rpkm18.71	scaffold_142	14243	14243	C	T	hom	30
exonic	gene_8412	gm1.6781_g	scaffold_142	35127	35127	G	A	hom	30
upstream	gene_8418	fgenesh1_pm.142_#_12	scaffold_142	43125	43125	C	T	hom	30
UTR3	gene_8422	fgenesh1_kg.142_#_27_#_Locus3658v1rpkm25.72	scaffold_142	56470	56470	A	T	hom	30
intergenic	gene_8426(dist=1042),gene_8427(dist=3841)	fgenesh1_pm.143_#_3(dist=1042),e_gw1.143.49.1(dist=3841)	scaffold_143	9688	9688	T	C	hom	30
exonic	gene_8429	estExt_fgenesh1_pm.C_1430006	scaffold_143	17541	17541	G	A	hom	30
exonic	gene_8429	estExt_fgenesh1_pm.C_1430006	scaffold_143	19382	19382	A	G	hom	30
exonic	gene_8444	estExt_Genewise1Plus.C_1430043	scaffold_143	47573	47573	T	G	hom	30
exonic	gene_8446	e_gw1.143.43.1	scaffold_143	52436	52436	G	C	hom	30
exonic	gene_8447	estExt_Genewise1Plus.C_1430051	scaffold_143	55619	55619	C	T	hom	30
intergenic	NONE(dist=NONE),gene_8449(dist=1861)	NONE(dist=NONE),e_gw1.144.14.1(dist=1861)	scaffold_144	833	833	C	T	hom	30
intergenic	NONE(dist=NONE),gene_8449(dist=1849)	NONE(dist=NONE),e_gw1.144.14.1(dist=1849)	scaffold_144	845	845	A	G	hom	30
intergenic	gene_8454(dist=1050),gene_8455(dist=6569)	fgenesh1_kg.144_#_11_#_Locus9967v2rpkm0.94(dist=1050),fgenesh1_kg.144_#_12_#_Locus3811v1rpkm24.02(dist=6569)	scaffold_144	22206	22206	A	T	hom	30
intergenic	gene_8455(dist=2969),NONE(dist=NONE)	fgenesh1_kg.144_#_12_#_Locus3811v1rpkm24.02(dist=2969),NONE(dist=NONE)	scaffold_144	34200	34200	C	A	hom	30
intergenic	gene_8455(dist=4984),NONE(dist=NONE)	fgenesh1_kg.144_#_12_#_Locus3811v1rpkm24.02(dist=4984),NONE(dist=NONE)	scaffold_144	36215	36215	C	T	hom	30
downstream	gene_8474	gm1.6833_g	scaffold_145	44838	44838	C	G	hom	30
upstream	gene_8476	estExt_Genemark1.C_1450018	scaffold_145	50426	50426	G	A	hom	30
upstream	gene_8476	estExt_Genemark1.C_1450018	scaffold_145	50428	50428	G	A	hom	30
exonic	gene_8479	e_gw1.146.50.1	scaffold_146	10536	10536	G	A	hom	30
exonic	gene_8499	e_gw1.146.33.1	scaffold_146	45527	45527	T	G	hom	30
downstream	gene_8500	fgenesh1_kg.146_#_28_#_Locus3042v1rpkm34.91	scaffold_146	51349	51349	T	G	hom	30
exonic	gene_8501	e_gw1.146.27.1	scaffold_146	52904	52904	T	C	hom	30
intronic	gene_8516	gm1.6863_g	scaffold_147	28996	28996	C	T	hom	30
exonic	gene_8527	estExt_fgenesh1_pm.C_1480001	scaffold_148	542	542	G	A	hom	30
exonic	gene_8527	estExt_fgenesh1_pm.C_1480001	scaffold_148	3552	3552	T	C	hom	30
upstream	gene_8529,gene_8530	fgenesh1_kg.148_#_4_#_Locus11822v1rpkm0.97,fgenesh1_pg.148_#_3	scaffold_148	10850	10850	G	A	hom	30
upstream	gene_8536,gene_8537	e_gw1.148.1.1,estExt_fgenesh1_pm.C_1480006	scaffold_148	24339	24339	A	G	hom	30
exonic	gene_8544	CE84299_1209	scaffold_148	45705	45705	A	T	hom	30
downstream	gene_8549	gm1.6886_g	scaffold_149	4215	4215	A	C	hom	30
downstream	gene_8549	gm1.6886_g	scaffold_149	5182	5182	G	T	hom	30
intergenic	gene_8549(dist=1010),gene_8551(dist=1874)	gm1.6886_g(dist=1010),fgenesh1_pg.149_#_2(dist=1874)	scaffold_149	5193	5193	A	C	hom	30
intergenic	gene_8549(dist=1040),gene_8551(dist=1844)	gm1.6886_g(dist=1040),fgenesh1_pg.149_#_2(dist=1844)	scaffold_149	5223	5223	C	T	hom	30
intergenic	gene_8549(dist=1079),gene_8551(dist=1805)	gm1.6886_g(dist=1079),fgenesh1_pg.149_#_2(dist=1805)	scaffold_149	5262	5262	A	G	hom	30
intergenic	gene_8549(dist=1206),gene_8551(dist=1678)	gm1.6886_g(dist=1206),fgenesh1_pg.149_#_2(dist=1678)	scaffold_149	5389	5389	G	A	hom	30
intergenic	gene_8549(dist=1214),gene_8551(dist=1670)	gm1.6886_g(dist=1214),fgenesh1_pg.149_#_2(dist=1670)	scaffold_149	5397	5397	C	T	hom	30
intergenic	gene_8549(dist=1427),gene_8551(dist=1457)	gm1.6886_g(dist=1427),fgenesh1_pg.149_#_2(dist=1457)	scaffold_149	5610	5610	G	A	hom	30
intergenic	gene_8549(dist=1434),gene_8551(dist=1450)	gm1.6886_g(dist=1434),fgenesh1_pg.149_#_2(dist=1450)	scaffold_149	5617	5617	A	T	hom	30
intergenic	gene_8549(dist=1436),gene_8551(dist=1448)	gm1.6886_g(dist=1436),fgenesh1_pg.149_#_2(dist=1448)	scaffold_149	5619	5619	A	G	hom	30
intergenic	gene_8549(dist=1881),gene_8551(dist=1003)	gm1.6886_g(dist=1881),fgenesh1_pg.149_#_2(dist=1003)	scaffold_149	6064	6064	T	C	hom	30
upstream	gene_8551	fgenesh1_pg.149_#_2	scaffold_149	6137	6137	G	A	hom	30
upstream	gene_8551	fgenesh1_pg.149_#_2	scaffold_149	6143	6143	C	T	hom	30
upstream	gene_8551	fgenesh1_pg.149_#_2	scaffold_149	6162	6162	G	A	hom	30
upstream	gene_8551	fgenesh1_pg.149_#_2	scaffold_149	6407	6407	C	T	hom	30
downstream	gene_8558	e_gw1.149.6.1	scaffold_149	20399	20399	C	T	hom	30
exonic	gene_8558	e_gw1.149.6.1	scaffold_149	22248	22248	C	T	hom	30
exonic	gene_8561	fgenesh1_pm.149_#_10	scaffold_149	25331	25331	C	T	hom	30
UTR3	gene_8565	CE85107_1380	scaffold_149	33963	33963	A	G	hom	30
intronic	gene_1826	fgenesh1_kg.15_#_1_#_Locus2178v3rpkm1.13_PRE	scaffold_15	1179	1179	C	T	hom	30
intergenic	gene_1828(dist=1051),gene_1829(dist=1380)	fgenesh1_pg.15_#_3(dist=1051),gw1.15.62.1(dist=1380)	scaffold_15	7731	7731	A	C	hom	30
exonic	gene_1836	fgenesh1_kg.15_#_15_#_Locus7651v1rpkm3.09	scaffold_15	25204	25204	G	A	hom	30
downstream	gene_1838,gene_1839	CE86063_54075,fgenesh1_kg.15_#_19_#_Locus5419v1rpkm10.11	scaffold_15	27832	27832	G	C	hom	30
downstream	gene_1838,gene_1839	CE86063_54075,fgenesh1_kg.15_#_19_#_Locus5419v1rpkm10.11	scaffold_15	27842	27842	G	A	hom	30
intergenic	gene_1845(dist=1720),gene_1850(dist=4983)	estExt_Genewise1.C_150033(dist=1720),gm1.1480_g(dist=4983)	scaffold_15	43993	43993	G	A	hom	30
intergenic	gene_1845(dist=2207),gene_1850(dist=4496)	estExt_Genewise1.C_150033(dist=2207),gm1.1480_g(dist=4496)	scaffold_15	44480	44480	T	C	hom	30
exonic	gene_1869	e_gw1.15.146.1	scaffold_15	90844	90844	T	G	hom	30
exonic	gene_1869	e_gw1.15.146.1	scaffold_15	91123	91123	T	A	hom	30
exonic	gene_1879	estExt_Genemark1.C_150042	scaffold_15	111085	111085	G	A	hom	30
exonic	gene_1880	fgenesh1_kg.15_#_66_#_Locus3346v1rpkm30.03	scaffold_15	116415	116415	G	T	hom	30
exonic	gene_1880	fgenesh1_kg.15_#_66_#_Locus3346v1rpkm30.03	scaffold_15	116502	116502	C	T	hom	30
exonic	gene_1880	fgenesh1_kg.15_#_66_#_Locus3346v1rpkm30.03	scaffold_15	116675	116675	G	C	hom	30
exonic	gene_1889	CE87492_242	scaffold_15	139929	139929	A	G	hom	30
upstream	gene_1893,gene_1894	fgenesh1_kg.15_#_77_#_Locus4013v1rpkm21.70,fgenesh1_pm.15_#_36	scaffold_15	148063	148063	G	A	hom	30
exonic	gene_1897	fgenesh1_kg.15_#_81_#_Locus5591v1rpkm9.21	scaffold_15	157123	157123	G	A	hom	30
downstream	gene_1902	CE87862_36	scaffold_15	167812	167812	C	T	hom	30
downstream	gene_1902	CE87862_36	scaffold_15	167814	167814	G	T	hom	30
upstream	gene_1902	CE87862_36	scaffold_15	168797	168797	C	T	hom	30
upstream	gene_1902	CE87862_36	scaffold_15	168848	168848	A	T	hom	30
UTR3	gene_1918	fgenesh1_kg.15_#_106_#_Locus2924v1rpkm37.45	scaffold_15	203014	203014	T	C	hom	30
exonic	gene_1922	e_gw1.15.42.1	scaffold_15	217462	217462	G	A	hom	30
upstream	gene_1927	estExt_Genewise1Plus.C_150137	scaffold_15	219503	219503	C	T	hom	30
exonic	gene_1928	CE89077_661	scaffold_15	224393	224393	A	G	hom	30
exonic	gene_1928	CE89077_661	scaffold_15	225332	225332	G	A	hom	30
exonic	gene_1928	CE89077_661	scaffold_15	226453	226453	C	T	hom	30
upstream	gene_8589	e_gw1.150.57.1	scaffold_150	34833	34833	A	G	hom	30
exonic	gene_8595	fgenesh1_pg.150_#_18	scaffold_150	49568	49568	T	C	hom	30
intronic	gene_8596	e_gw1.151.56.1	scaffold_151	1781	1781	G	A	hom	30
intronic	gene_8596	e_gw1.151.56.1	scaffold_151	1782	1782	G	T	hom	30
intronic	gene_8596	e_gw1.151.56.1	scaffold_151	1784	1784	G	C	hom	30
intronic	gene_8596	e_gw1.151.56.1	scaffold_151	1811	1811	C	A	hom	30
upstream	gene_8599,gene_8600	estExt_Genemark1.C_1510005,estExt_Genewise1Plus.C_1510010	scaffold_151	12397	12397	T	C	hom	30
exonic	gene_8607	fgenesh1_kg.151_#_17_#_Locus7518v2rpkm1.93	scaffold_151	26631	26631	G	A	hom	30
intronic	gene_8611	fgenesh1_kg.151_#_21_#_Locus8072v1rpkm2.64	scaffold_151	34180	34180	T	C	hom	30
downstream	gene_8618,gene_8619	CE91594_9761,estExt_Genewise1.C_1510056	scaffold_151	47520	47520	T	C	hom	30
downstream	gene_8618,gene_8619	CE91594_9761,estExt_Genewise1.C_1510056	scaffold_151	47521	47521	T	A	hom	30
downstream	gene_8618,gene_8619	CE91594_9761,estExt_Genewise1.C_1510056	scaffold_151	47522	47522	G	A	hom	30
upstream	gene_8622	e_gw1.152.31.1	scaffold_152	6994	6994	T	C	hom	30
exonic	gene_8630	fgenesh1_kg.152_#_9_#_Locus8016v1rpkm2.68	scaffold_152	26163	26163	A	T	hom	30
exonic	gene_8631	fgenesh1_kg.152_#_11_#_Locus3206v1rpkm32.26	scaffold_152	28318	28318	C	G	hom	30
upstream	gene_8674,gene_8675	CE93923_867,estExt_Genewise1Plus.C_1540012	scaffold_154	31205	31205	C	T	hom	30
upstream	gene_8674,gene_8675	CE93923_867,estExt_Genewise1Plus.C_1540012	scaffold_154	31258	31258	C	T	hom	30
upstream	gene_8678,gene_8679	e_gw1.154.14.1,fgenesh1_kg.154_#_14_#_Locus6060v1rpkm7.16	scaffold_154	38918	38918	T	G	hom	30
intergenic	NONE(dist=NONE),gene_8686(dist=2916)	NONE(dist=NONE),e_gw1.155.42.1(dist=2916)	scaffold_155	539	539	C	T	hom	30
intergenic	NONE(dist=NONE),gene_8686(dist=2707)	NONE(dist=NONE),e_gw1.155.42.1(dist=2707)	scaffold_155	748	748	G	A	hom	30
intergenic	NONE(dist=NONE),gene_8686(dist=2651)	NONE(dist=NONE),e_gw1.155.42.1(dist=2651)	scaffold_155	804	804	G	A	hom	30
intergenic	NONE(dist=NONE),gene_8686(dist=2601)	NONE(dist=NONE),e_gw1.155.42.1(dist=2601)	scaffold_155	854	854	C	T	hom	30
intergenic	NONE(dist=NONE),gene_8686(dist=2369)	NONE(dist=NONE),e_gw1.155.42.1(dist=2369)	scaffold_155	1086	1086	G	A	hom	30
UTR3	gene_8700	CE94472_101208	scaffold_155	31864	31864	G	A	hom	30
upstream	gene_8714	fgenesh1_pm.156_#_4	scaffold_156	7903	7903	T	C	hom	30
downstream	gene_8714	fgenesh1_pm.156_#_4	scaffold_156	12478	12478	T	G	hom	30
downstream	gene_8714	fgenesh1_pm.156_#_4	scaffold_156	12479	12479	T	G	hom	30
downstream	gene_8714	fgenesh1_pm.156_#_4	scaffold_156	12480	12480	A	C	hom	30
downstream	gene_8714	fgenesh1_pm.156_#_4	scaffold_156	12483	12483	T	C	hom	30
downstream	gene_8714	fgenesh1_pm.156_#_4	scaffold_156	12484	12484	A	C	hom	30
downstream	gene_8714	fgenesh1_pm.156_#_4	scaffold_156	12487	12487	G	T	hom	30
downstream	gene_8714	fgenesh1_pm.156_#_4	scaffold_156	12488	12488	G	T	hom	30
downstream	gene_8714	fgenesh1_pm.156_#_4	scaffold_156	12489	12489	A	T	hom	30
downstream	gene_8714	fgenesh1_pm.156_#_4	scaffold_156	12491	12491	A	T	hom	30
downstream	gene_8714	fgenesh1_pm.156_#_4	scaffold_156	12492	12492	C	T	hom	30
downstream	gene_8714	fgenesh1_pm.156_#_4	scaffold_156	12493	12493	C	T	hom	30
downstream	gene_8714	fgenesh1_pm.156_#_4	scaffold_156	12496	12496	G	T	hom	30
downstream	gene_8714	fgenesh1_pm.156_#_4	scaffold_156	12497	12497	A	T	hom	30
upstream	gene_8715	e_gw1.156.46.1	scaffold_156	13303	13303	G	A	hom	30
exonic	gene_8715	e_gw1.156.46.1	scaffold_156	16145	16145	A	C	hom	30
exonic	gene_8722	e_gw1.156.45.1	scaffold_156	32562	32562	C	T	hom	30
exonic	gene_8722	e_gw1.156.45.1	scaffold_156	32858	32858	T	C	hom	30
upstream;downstream	gene_8723;gene_8722	e_gw1.156.38.1;e_gw1.156.45.1	scaffold_156	33196	33196	G	C	hom	30
downstream	gene_8727,gene_8728	CE95512_24832,estExt_fgenesh1_pg.C_1560017	scaffold_156	45631	45631	C	T	hom	30
intronic	gene_8729	CE95606_18647	scaffold_157	1805	1805	T	C	hom	30
exonic	gene_8740	fgenesh1_pg.157_#_12	scaffold_157	36420	36420	A	C	hom	30
downstream	gene_8747	gw1.157.37.1	scaffold_157	47405	47405	G	A	hom	30
downstream	gene_8764	gm1.7071_g	scaffold_158	36206	36206	C	T	hom	30
intergenic	gene_8789(dist=1448),gene_8790(dist=1866)	fgenesh1_kg.159_#_21_#_Locus7167v1rpkm3.89(dist=1448),e_gw1.159.25.1(dist=1866)	scaffold_159	44325	44325	G	T	hom	30
upstream	gene_8790	e_gw1.159.25.1	scaffold_159	47715	47715	C	A	hom	30
exonic	gene_1946	MIX5178_1073_29	scaffold_16	8694	8694	C	G	hom	30
exonic	gene_1946	MIX5178_1073_29	scaffold_16	10112	10112	T	C	hom	30
upstream	gene_1952,gene_1953	estExt_fgenesh1_pm.C_160007,fgenesh1_pg.16_#_12	scaffold_16	22993	22993	G	A	hom	30
UTR3	gene_1958	CE99967_1569	scaffold_16	32305	32305	C	T	hom	30
exonic	gene_1969	estExt_Genewise1.C_160026	scaffold_16	56464	56464	T	C	hom	30
UTR5	gene_1970	CE100329_36	scaffold_16	57775	57775	A	G	hom	30
intronic	gene_1970	CE100329_36	scaffold_16	57874	57874	T	C	hom	30
exonic	gene_1970	CE100329_36	scaffold_16	58274	58274	A	G	hom	30
exonic	gene_1970	CE100329_36	scaffold_16	58374	58374	T	C	hom	30
downstream	gene_1970,gene_1971	CE100329_36,gm1.1577_g	scaffold_16	58951	58951	T	C	hom	30
downstream	gene_1970,gene_1971	CE100329_36,gm1.1577_g	scaffold_16	59277	59277	A	G	hom	30
downstream	gene_1970,gene_1971	CE100329_36,gm1.1577_g	scaffold_16	59327	59327	T	C	hom	30
exonic	gene_1971	gm1.1577_g	scaffold_16	60094	60094	T	C	hom	30
intergenic	gene_1972(dist=1237),gene_1974(dist=1225)	CE100339_650(dist=1237),fgenesh1_kg.16_#_27_#_Locus5601v1rpkm9.15(dist=1225)	scaffold_16	62977	62977	T	C	hom	30
exonic	gene_1977	gm1.1581_g	scaffold_16	73020	73020	C	A	hom	30
exonic	gene_1984	gm1.1586_g	scaffold_16	87886	87886	G	A	hom	30
exonic	gene_1985	fgenesh1_kg.16_#_39_#_Locus623v1rpkm273.97	scaffold_16	93449	93449	G	C	hom	30
exonic	gene_1985	fgenesh1_kg.16_#_39_#_Locus623v1rpkm273.97	scaffold_16	94419	94419	G	A	hom	30
exonic	gene_1987	fgenesh1_kg.16_#_41_#_Locus4692v1rpkm15.19	scaffold_16	97344	97344	A	G	hom	30
intronic	gene_1994	e_gw1.16.1.1	scaffold_16	116208	116208	A	G	hom	30
exonic	gene_1998	estExt_Genewise1Plus.C_160073	scaffold_16	130954	130954	G	A	hom	30
exonic	gene_2003	MIX5281_24025_56	scaffold_16	145758	145758	T	C	hom	30
upstream	gene_2038	e_gw1.16.8.1	scaffold_16	233678	233678	T	A	hom	30
exonic	gene_2040	fgenesh1_kg.16_#_100_#_Locus6750v1rpkm4.83	scaffold_16	237685	237685	T	C	hom	30
intergenic	NONE(dist=NONE),gene_8791(dist=1467)	NONE(dist=NONE),fgenesh1_pg.160_#_1(dist=1467)	scaffold_160	67	67	T	C	hom	30
downstream	gene_8791	fgenesh1_pg.160_#_1	scaffold_160	1170	1170	A	G	hom	30
upstream;downstream	gene_8796;gene_8794,gene_8795	estExt_Genewise1.C_1600008;MIX5385_40_100,estExt_Genewise1Plus.C_1600004	scaffold_160	7382	7382	A	G	hom	30
upstream;downstream	gene_8796;gene_8794,gene_8795	estExt_Genewise1.C_1600008;MIX5385_40_100,estExt_Genewise1Plus.C_1600004	scaffold_160	7383	7383	C	T	hom	30
upstream;downstream	gene_8796;gene_8794,gene_8795	estExt_Genewise1.C_1600008;MIX5385_40_100,estExt_Genewise1Plus.C_1600004	scaffold_160	7384	7384	A	G	hom	30
exonic	gene_8796	estExt_Genewise1.C_1600008	scaffold_160	8346	8346	T	C	hom	30
intronic	gene_8796	estExt_Genewise1.C_1600008	scaffold_160	8665	8665	A	G	hom	30
exonic	gene_8808	e_gw1.160.17.1	scaffold_160	38353	38353	C	G	hom	30
upstream	gene_8808	e_gw1.160.17.1	scaffold_160	38491	38491	T	C	hom	30
exonic	gene_8813	fgenesh1_kg.161_#_1_#_Locus2448v1rpkm48.44	scaffold_161	1494	1494	T	C	hom	30
downstream	gene_8817,gene_8818	estExt_Genewise1.C_1610013,estExt_fgenesh1_pg.C_1610006	scaffold_161	14100	14100	C	T	hom	30
downstream	gene_8827,gene_8828	e_gw1.161.29.1,fgenesh1_kg.161_#_19_#_Locus4673v1rpkm15.30	scaffold_161	30145	30145	C	T	hom	30
intergenic	gene_8828(dist=1557),gene_8829(dist=3110)	fgenesh1_kg.161_#_19_#_Locus4673v1rpkm15.30(dist=1557),e_gw1.161.30.1(dist=3110)	scaffold_161	33495	33495	C	G	hom	30
exonic	gene_8831	fgenesh1_pg.161_#_16	scaffold_161	40245	40245	C	T	hom	30
UTR5	gene_8832	fgenesh1_kg.161_#_24_#_Locus5025v1rpkm12.51	scaffold_161	42823	42823	C	T	hom	30
upstream;downstream	gene_8842;gene_8841	MIX5510_60_87;fgenesh1_kg.162_#_8_#_Locus7140v1rpkm3.94	scaffold_162	19752	19752	C	T	hom	30
intergenic	gene_8842(dist=1024),gene_8843(dist=1075)	MIX5510_60_87(dist=1024),fgenesh1_kg.162_#_13_#_Locus648v1rpkm262.38(dist=1075)	scaffold_162	22260	22260	G	C	hom	30
exonic	gene_8844	e_gw1.162.29.1	scaffold_162	29203	29203	G	T	hom	30
exonic	gene_8844	e_gw1.162.29.1	scaffold_162	29768	29768	A	G	hom	30
intronic	gene_8856	fgenesh1_pm.163_#_2	scaffold_163	6733	6733	A	G	hom	30
upstream	gene_8895	gw1.164.52.1	scaffold_164	37264	37264	C	G	hom	30
upstream	gene_8895	gw1.164.52.1	scaffold_164	37265	37265	T	A	hom	30
upstream	gene_8895	gw1.164.52.1	scaffold_164	37266	37266	G	A	hom	30
exonic	gene_8901	estExt_fgenesh1_pg.C_1650003	scaffold_165	4079	4079	T	A	hom	30
exonic	gene_8901	estExt_fgenesh1_pg.C_1650003	scaffold_165	4080	4080	T	C	hom	30
downstream	gene_8954	fgenesh1_kg.167_#_6_#_Locus2995v1rpkm35.92	scaffold_167	11192	11192	C	A	hom	30
downstream	gene_8954	fgenesh1_kg.167_#_6_#_Locus2995v1rpkm35.92	scaffold_167	11202	11202	C	A	hom	30
UTR5	gene_8954	fgenesh1_kg.167_#_6_#_Locus2995v1rpkm35.92	scaffold_167	15314	15314	G	A	hom	30
intronic	gene_8960	estExt_Genewise1.C_1670024	scaffold_167	24690	24690	C	T	hom	30
exonic	gene_8960	estExt_Genewise1.C_1670024	scaffold_167	25942	25942	G	A	hom	30
exonic	gene_8961	fgenesh1_kg.167_#_13_#_Locus2902v1rpkm37.85	scaffold_167	30090	30090	T	C	hom	30
intronic	gene_8967	estExt_fgenesh1_pm.C_1670013	scaffold_167	39219	39219	T	C	hom	30
exonic	gene_8976	fgenesh1_pm.168_#_8	scaffold_168	21374	21374	T	C	hom	30
upstream	gene_8984	fgenesh1_kg.168_#_17_#_Locus2798v1rpkm39.90	scaffold_168	45349	45349	A	G	hom	30
intronic	gene_8991	gm1.7264_g	scaffold_169	16359	16359	G	A	hom	30
intronic	gene_8991	gm1.7264_g	scaffold_169	16367	16367	A	G	hom	30
intronic	gene_8991	gm1.7264_g	scaffold_169	16369	16369	G	A	hom	30
intronic	gene_8991	gm1.7264_g	scaffold_169	16377	16377	G	A	hom	30
intronic	gene_8991	gm1.7264_g	scaffold_169	16401	16401	G	A	hom	30
intronic	gene_8991	gm1.7264_g	scaffold_169	16406	16406	T	C	hom	30
exonic	gene_8998	e_gw1.169.27.1	scaffold_169	30756	30756	A	G	hom	30
intergenic	gene_9000(dist=2114),gene_9002(dist=1331)	estExt_Genewise1Plus.C_1690029(dist=2114),fgenesh1_kg.169_#_28_#_Locus1352v3rpkm1.40_PRE(dist=1331)	scaffold_169	37554	37554	A	G	hom	30
intergenic	gene_9000(dist=2120),gene_9002(dist=1325)	estExt_Genewise1Plus.C_1690029(dist=2120),fgenesh1_kg.169_#_28_#_Locus1352v3rpkm1.40_PRE(dist=1325)	scaffold_169	37560	37560	A	G	hom	30
intergenic	gene_9000(dist=2129),gene_9002(dist=1316)	estExt_Genewise1Plus.C_1690029(dist=2129),fgenesh1_kg.169_#_28_#_Locus1352v3rpkm1.40_PRE(dist=1316)	scaffold_169	37569	37569	C	G	hom	30
intergenic	gene_9000(dist=2133),gene_9002(dist=1312)	estExt_Genewise1Plus.C_1690029(dist=2133),fgenesh1_kg.169_#_28_#_Locus1352v3rpkm1.40_PRE(dist=1312)	scaffold_169	37573	37573	A	G	hom	30
intergenic	gene_9000(dist=2146),gene_9002(dist=1299)	estExt_Genewise1Plus.C_1690029(dist=2146),fgenesh1_kg.169_#_28_#_Locus1352v3rpkm1.40_PRE(dist=1299)	scaffold_169	37586	37586	A	G	hom	30
intergenic	gene_9000(dist=2163),gene_9002(dist=1282)	estExt_Genewise1Plus.C_1690029(dist=2163),fgenesh1_kg.169_#_28_#_Locus1352v3rpkm1.40_PRE(dist=1282)	scaffold_169	37603	37603	C	T	hom	30
intergenic	gene_9000(dist=2167),gene_9002(dist=1278)	estExt_Genewise1Plus.C_1690029(dist=2167),fgenesh1_kg.169_#_28_#_Locus1352v3rpkm1.40_PRE(dist=1278)	scaffold_169	37607	37607	C	T	hom	30
intergenic	gene_9000(dist=2176),gene_9002(dist=1269)	estExt_Genewise1Plus.C_1690029(dist=2176),fgenesh1_kg.169_#_28_#_Locus1352v3rpkm1.40_PRE(dist=1269)	scaffold_169	37616	37616	C	G	hom	30
intergenic	gene_9000(dist=2184),gene_9002(dist=1261)	estExt_Genewise1Plus.C_1690029(dist=2184),fgenesh1_kg.169_#_28_#_Locus1352v3rpkm1.40_PRE(dist=1261)	scaffold_169	37624	37624	A	G	hom	30
exonic	gene_9005	estExt_fgenesh1_pg.C_1690016	scaffold_169	43380	43380	A	G	hom	30
intronic	gene_2048	estExt_fgenesh1_pm.C_170002	scaffold_17	4053	4053	T	C	hom	30
downstream	gene_2050	fgenesh1_pm.17_#_3	scaffold_17	9396	9396	C	T	hom	30
upstream	gene_2051	e_gw1.17.93.1	scaffold_17	10351	10351	C	T	hom	30
intergenic	gene_2059(dist=3462),gene_2061(dist=1432)	CE111990_10982(dist=3462),gm1.1656_g(dist=1432)	scaffold_17	34717	34717	G	A	hom	30
exonic	gene_2067	estExt_fgenesh1_pm.C_170014	scaffold_17	49728	49728	C	T	hom	30
exonic	gene_2075	CE112193_2211	scaffold_17	63661	63661	C	A	hom	30
UTR5	gene_2077	CE112262_600	scaffold_17	67552	67552	G	C	hom	30
upstream	gene_2081	estExt_fgenesh1_pg.C_170030	scaffold_17	76234	76234	T	C	hom	30
upstream	gene_2085,gene_2086	CE112428_97,CE112442_310	scaffold_17	78892	78892	C	T	hom	30
upstream	gene_2104	estExt_Genewise1.C_170072	scaffold_17	109285	109285	A	T	hom	30
exonic	gene_2105	gm1.1685_g	scaffold_17	112858	112858	T	C	hom	30
upstream;downstream	gene_2109;gene_2110	fgenesh1_pg.17_#_46;fgenesh1_pm.17_#_32	scaffold_17	123535	123535	G	A	hom	30
exonic	gene_2128	gm1.1706_g	scaffold_17	161661	161661	C	G	hom	30
exonic	gene_2128	gm1.1706_g	scaffold_17	162045	162045	A	G	hom	30
upstream;downstream	gene_2135;gene_2134	fgenesh1_kg.17_#_74_#_Locus5107v1rpkm11.99;estExt_Genewise1Plus.C_170132	scaffold_17	178358	178358	A	G	hom	30
upstream	gene_2142	CE114550_739	scaffold_17	194409	194409	A	G	hom	30
UTR5	gene_2155	CE114894_4189	scaffold_17	218032	218032	A	G	hom	30
exonic	gene_2158	fgenesh1_kg.17_#_104_#_Locus3926v1rpkm22.56	scaffold_17	224990	224990	C	T	hom	30
exonic	gene_2164	fgenesh1_kg.17_#_112_#_Locus594v1rpkm288.60	scaffold_17	245692	245692	A	C	hom	30
upstream	gene_2164	fgenesh1_kg.17_#_112_#_Locus594v1rpkm288.60	scaffold_17	246704	246704	A	G	hom	30
upstream	gene_9028	e_gw1.171.16.1	scaffold_171	57	57	G	A	hom	30
exonic	gene_9030	estExt_Genewise1Plus.C_1710006	scaffold_171	7881	7881	G	T	hom	30
exonic	gene_9033	CE116824_20432	scaffold_171	17493	17493	C	T	hom	30
upstream	gene_9033,gene_9034	CE116824_20432,estExt_Genemark1.C_1710006	scaffold_171	18527	18527	C	G	hom	30
intronic	gene_9041	estExt_fgenesh1_pm.C_1710010	scaffold_171	37169	37169	T	C	hom	30
exonic	gene_9045	fgenesh1_pg.172_#_1	scaffold_172	934	934	C	A	hom	30
exonic	gene_9056	estExt_Genewise1Plus.C_1720023	scaffold_172	25700	25700	G	A	hom	30
upstream;downstream	gene_9068;gene_9069	e_gw1.173.30.1;CE118096_12350	scaffold_173	12613	12613	T	C	hom	30
exonic	gene_9093	fgenesh1_kg.174_#_13_#_Locus4600v1rpkm16.05	scaffold_174	34583	34583	C	G	hom	30
upstream	gene_9098	CE119298_3118	scaffold_175	223	223	C	T	hom	30
exonic	gene_9103	estExt_fgenesh1_pg.C_1750006	scaffold_175	10551	10551	G	A	hom	30
exonic	gene_9144	estExt_fgenesh1_pm.C_1770007	scaffold_177	22113	22113	G	A	hom	30
exonic	gene_9147	estExt_Genewise1Plus.C_1770032	scaffold_177	31865	31865	G	C	hom	30
exonic	gene_9152	fgenesh1_kg.178_#_4_#_Locus299v1rpkm609.83	scaffold_178	7966	7966	A	G	hom	30
upstream	gene_9155	e_gw1.178.11.1	scaffold_178	16870	16870	G	A	hom	30
upstream	gene_9155	e_gw1.178.11.1	scaffold_178	16871	16871	G	A	hom	30
upstream	gene_9155	e_gw1.178.11.1	scaffold_178	16872	16872	T	A	hom	30
upstream	gene_9155	e_gw1.178.11.1	scaffold_178	16873	16873	T	A	hom	30
upstream	gene_9155	e_gw1.178.11.1	scaffold_178	16874	16874	T	A	hom	30
upstream	gene_9155	e_gw1.178.11.1	scaffold_178	16875	16875	G	A	hom	30
upstream	gene_9155	e_gw1.178.11.1	scaffold_178	16876	16876	G	A	hom	30
upstream	gene_9155	e_gw1.178.11.1	scaffold_178	16878	16878	G	A	hom	30
upstream	gene_9155	e_gw1.178.11.1	scaffold_178	16880	16880	C	A	hom	30
upstream	gene_9155	e_gw1.178.11.1	scaffold_178	16881	16881	T	A	hom	30
upstream	gene_9155	e_gw1.178.11.1	scaffold_178	16882	16882	C	A	hom	30
upstream	gene_9155	e_gw1.178.11.1	scaffold_178	16883	16883	C	A	hom	30
upstream	gene_9155	e_gw1.178.11.1	scaffold_178	16884	16884	T	A	hom	30
upstream	gene_9155	e_gw1.178.11.1	scaffold_178	16885	16885	G	A	hom	30
upstream	gene_9155	e_gw1.178.11.1	scaffold_178	16887	16887	T	A	hom	30
upstream	gene_9155	e_gw1.178.11.1	scaffold_178	16888	16888	C	A	hom	30
upstream	gene_9155	e_gw1.178.11.1	scaffold_178	16889	16889	T	A	hom	30
upstream	gene_9155	e_gw1.178.11.1	scaffold_178	16891	16891	C	T	hom	30
upstream	gene_9155	e_gw1.178.11.1	scaffold_178	16893	16893	G	T	hom	30
upstream	gene_9155	e_gw1.178.11.1	scaffold_178	16897	16897	T	A	hom	30
upstream	gene_9155	e_gw1.178.11.1	scaffold_178	16898	16898	C	G	hom	30
upstream	gene_9155	e_gw1.178.11.1	scaffold_178	16899	16899	C	A	hom	30
upstream	gene_9155	e_gw1.178.11.1	scaffold_178	16900	16900	G	A	hom	30
exonic	gene_9159	estExt_Genemark1.C_1780010	scaffold_178	30000	30000	G	A	hom	30
intergenic	gene_9159(dist=2688),gene_9160(dist=2054)	estExt_Genemark1.C_1780010(dist=2688),CE121570_2452(dist=2054)	scaffold_178	32964	32964	T	C	hom	30
exonic	gene_9168	e_gw1.179.18.1	scaffold_179	14759	14759	G	A	hom	30
downstream	gene_9168,gene_9169	e_gw1.179.18.1,e_gw1.179.32.1	scaffold_179	19176	19176	A	C	hom	30
downstream	gene_9168,gene_9169	e_gw1.179.18.1,e_gw1.179.32.1	scaffold_179	19427	19427	C	T	hom	30
downstream	gene_9168,gene_9169	e_gw1.179.18.1,e_gw1.179.32.1	scaffold_179	19428	19428	A	T	hom	30
upstream	gene_2170,gene_2171	estExt_Genewise1Plus.C_180007,fgenesh1_pg.18_#_6	scaffold_18	12073	12073	G	T	hom	30
exonic	gene_2171	estExt_Genewise1Plus.C_180007	scaffold_18	14536	14536	A	G	hom	30
downstream	gene_2174	fgenesh1_kg.18_#_9_#_Locus16505v1rpkm0.16	scaffold_18	19115	19115	C	A	hom	30
upstream	gene_2176	estExt_Genemark1.C_180009	scaffold_18	23522	23522	T	G	hom	30
exonic	gene_2184	fgenesh1_pm.18_#_8	scaffold_18	38803	38803	G	A	hom	30
upstream	gene_2197	estExt_fgenesh1_pg.C_180028	scaffold_18	73632	73632	G	A	hom	30
downstream	gene_2199,gene_2200	estExt_fgenesh1_pg.C_180029,fgenesh1_pg.18_#_31	scaffold_18	76249	76249	C	T	hom	30
upstream	gene_2205	fgenesh1_kg.18_#_38_#_Locus15001v1rpkm0.42	scaffold_18	87543	87543	A	G	hom	30
intronic	gene_2206	fgenesh1_pm.18_#_18	scaffold_18	95035	95035	A	G	hom	30
exonic	gene_2212	CE124261_57474	scaffold_18	111339	111339	G	A	hom	30
exonic	gene_2212	CE124261_57474	scaffold_18	111458	111458	T	G	hom	30
exonic	gene_2212	CE124261_57474	scaffold_18	111972	111972	A	C	hom	30
exonic	gene_2213	estExt_fgenesh1_pm.C_180023	scaffold_18	113420	113420	A	T	hom	30
exonic	gene_2217	e_gw1.18.6.1	scaffold_18	121868	121868	C	A	hom	30
upstream	gene_2224	fgenesh1_kg.18_#_60_#_Locus4091v1rpkm20.97	scaffold_18	134760	134760	C	G	hom	30
upstream	gene_2224	fgenesh1_kg.18_#_60_#_Locus4091v1rpkm20.97	scaffold_18	134761	134761	C	G	hom	30
downstream	gene_2224	fgenesh1_kg.18_#_60_#_Locus4091v1rpkm20.97	scaffold_18	136495	136495	A	T	hom	30
downstream	gene_2224	fgenesh1_kg.18_#_60_#_Locus4091v1rpkm20.97	scaffold_18	136496	136496	T	C	hom	30
exonic	gene_9181	CE127013_6871	scaffold_180	7349	7349	C	T	hom	30
exonic	gene_9187	estExt_Genemark1.C_1800007	scaffold_180	19556	19556	G	A	hom	30
UTR5	gene_9198	CE127594_81864	scaffold_181	451	451	A	G	hom	30
exonic	gene_9198	CE127594_81864	scaffold_181	660	660	T	G	hom	30
exonic	gene_9198	CE127594_81864	scaffold_181	661	661	C	T	hom	30
exonic	gene_9205	CE127746_6449	scaffold_181	13192	13192	G	C	hom	30
upstream;downstream	gene_9219;gene_9220	fgenesh1_kg.182_#_3_#_Locus42v2rpkm10.25_PRE;fgenesh1_kg.182_#_4_#_Locus2948v1rpkm37.05	scaffold_182	4170	4170	A	C	hom	30
upstream;downstream	gene_9219;gene_9220	fgenesh1_kg.182_#_3_#_Locus42v2rpkm10.25_PRE;fgenesh1_kg.182_#_4_#_Locus2948v1rpkm37.05	scaffold_182	4172	4172	A	C	hom	30
upstream;downstream	gene_9219;gene_9220	fgenesh1_kg.182_#_3_#_Locus42v2rpkm10.25_PRE;fgenesh1_kg.182_#_4_#_Locus2948v1rpkm37.05	scaffold_182	4178	4178	A	G	hom	30
upstream;downstream	gene_9219;gene_9220	fgenesh1_kg.182_#_3_#_Locus42v2rpkm10.25_PRE;fgenesh1_kg.182_#_4_#_Locus2948v1rpkm37.05	scaffold_182	4179	4179	A	G	hom	30
upstream;downstream	gene_9219;gene_9220	fgenesh1_kg.182_#_3_#_Locus42v2rpkm10.25_PRE;fgenesh1_kg.182_#_4_#_Locus2948v1rpkm37.05	scaffold_182	4180	4180	A	G	hom	30
upstream;downstream	gene_9219;gene_9220	fgenesh1_kg.182_#_3_#_Locus42v2rpkm10.25_PRE;fgenesh1_kg.182_#_4_#_Locus2948v1rpkm37.05	scaffold_182	4181	4181	A	C	hom	30
upstream;downstream	gene_9219;gene_9220	fgenesh1_kg.182_#_3_#_Locus42v2rpkm10.25_PRE;fgenesh1_kg.182_#_4_#_Locus2948v1rpkm37.05	scaffold_182	4183	4183	A	C	hom	30
upstream;downstream	gene_9219;gene_9220	fgenesh1_kg.182_#_3_#_Locus42v2rpkm10.25_PRE;fgenesh1_kg.182_#_4_#_Locus2948v1rpkm37.05	scaffold_182	4184	4184	A	G	hom	30
upstream;downstream	gene_9219;gene_9220	fgenesh1_kg.182_#_3_#_Locus42v2rpkm10.25_PRE;fgenesh1_kg.182_#_4_#_Locus2948v1rpkm37.05	scaffold_182	4185	4185	A	G	hom	30
upstream;downstream	gene_9219;gene_9220	fgenesh1_kg.182_#_3_#_Locus42v2rpkm10.25_PRE;fgenesh1_kg.182_#_4_#_Locus2948v1rpkm37.05	scaffold_182	4190	4190	A	T	hom	30
upstream;downstream	gene_9219;gene_9220	fgenesh1_kg.182_#_3_#_Locus42v2rpkm10.25_PRE;fgenesh1_kg.182_#_4_#_Locus2948v1rpkm37.05	scaffold_182	4191	4191	A	T	hom	30
downstream	gene_9237	CE129022_42	scaffold_182	32842	32842	C	A	hom	30
intergenic	gene_10019(dist=3352),NONE(dist=NONE)	fgenesh1_kg.183_#_1_#_Locus14545v2rpkm0.31(dist=3352),NONE(dist=NONE)	scaffold_183	6737	6737	C	T	hom	30
intergenic	gene_10019(dist=8176),NONE(dist=NONE)	fgenesh1_kg.183_#_1_#_Locus14545v2rpkm0.31(dist=8176),NONE(dist=NONE)	scaffold_183	11561	11561	G	A	hom	30
intergenic	gene_10019(dist=15569),NONE(dist=NONE)	fgenesh1_kg.183_#_1_#_Locus14545v2rpkm0.31(dist=15569),NONE(dist=NONE)	scaffold_183	18954	18954	C	T	hom	30
intergenic	gene_10019(dist=16371),NONE(dist=NONE)	fgenesh1_kg.183_#_1_#_Locus14545v2rpkm0.31(dist=16371),NONE(dist=NONE)	scaffold_183	19756	19756	G	A	hom	30
intergenic	gene_10019(dist=20267),NONE(dist=NONE)	fgenesh1_kg.183_#_1_#_Locus14545v2rpkm0.31(dist=20267),NONE(dist=NONE)	scaffold_183	23652	23652	C	A	hom	30
intergenic	gene_10019(dist=20270),NONE(dist=NONE)	fgenesh1_kg.183_#_1_#_Locus14545v2rpkm0.31(dist=20270),NONE(dist=NONE)	scaffold_183	23655	23655	T	G	hom	30
intergenic	gene_10019(dist=20331),NONE(dist=NONE)	fgenesh1_kg.183_#_1_#_Locus14545v2rpkm0.31(dist=20331),NONE(dist=NONE)	scaffold_183	23716	23716	T	C	hom	30
intergenic	gene_10019(dist=20332),NONE(dist=NONE)	fgenesh1_kg.183_#_1_#_Locus14545v2rpkm0.31(dist=20332),NONE(dist=NONE)	scaffold_183	23717	23717	C	T	hom	30
intergenic	gene_10019(dist=20336),NONE(dist=NONE)	fgenesh1_kg.183_#_1_#_Locus14545v2rpkm0.31(dist=20336),NONE(dist=NONE)	scaffold_183	23721	23721	T	C	hom	30
intergenic	gene_10019(dist=20337),NONE(dist=NONE)	fgenesh1_kg.183_#_1_#_Locus14545v2rpkm0.31(dist=20337),NONE(dist=NONE)	scaffold_183	23722	23722	G	A	hom	30
intergenic	gene_10019(dist=20338),NONE(dist=NONE)	fgenesh1_kg.183_#_1_#_Locus14545v2rpkm0.31(dist=20338),NONE(dist=NONE)	scaffold_183	23723	23723	A	G	hom	30
intergenic	gene_10019(dist=20404),NONE(dist=NONE)	fgenesh1_kg.183_#_1_#_Locus14545v2rpkm0.31(dist=20404),NONE(dist=NONE)	scaffold_183	23789	23789	T	C	hom	30
intergenic	gene_10019(dist=20407),NONE(dist=NONE)	fgenesh1_kg.183_#_1_#_Locus14545v2rpkm0.31(dist=20407),NONE(dist=NONE)	scaffold_183	23792	23792	G	A	hom	30
intergenic	gene_10019(dist=20465),NONE(dist=NONE)	fgenesh1_kg.183_#_1_#_Locus14545v2rpkm0.31(dist=20465),NONE(dist=NONE)	scaffold_183	23850	23850	T	C	hom	30
intergenic	gene_10019(dist=20472),NONE(dist=NONE)	fgenesh1_kg.183_#_1_#_Locus14545v2rpkm0.31(dist=20472),NONE(dist=NONE)	scaffold_183	23857	23857	A	G	hom	30
intergenic	gene_10019(dist=22934),NONE(dist=NONE)	fgenesh1_kg.183_#_1_#_Locus14545v2rpkm0.31(dist=22934),NONE(dist=NONE)	scaffold_183	26319	26319	T	A	hom	30
intergenic	gene_10019(dist=32496),NONE(dist=NONE)	fgenesh1_kg.183_#_1_#_Locus14545v2rpkm0.31(dist=32496),NONE(dist=NONE)	scaffold_183	35881	35881	A	G	hom	30
intergenic	gene_10019(dist=32560),NONE(dist=NONE)	fgenesh1_kg.183_#_1_#_Locus14545v2rpkm0.31(dist=32560),NONE(dist=NONE)	scaffold_183	35945	35945	C	T	hom	30
intergenic	gene_10019(dist=32685),NONE(dist=NONE)	fgenesh1_kg.183_#_1_#_Locus14545v2rpkm0.31(dist=32685),NONE(dist=NONE)	scaffold_183	36070	36070	G	T	hom	30
intergenic	gene_10019(dist=32759),NONE(dist=NONE)	fgenesh1_kg.183_#_1_#_Locus14545v2rpkm0.31(dist=32759),NONE(dist=NONE)	scaffold_183	36144	36144	C	T	hom	30
intergenic	gene_10019(dist=32814),NONE(dist=NONE)	fgenesh1_kg.183_#_1_#_Locus14545v2rpkm0.31(dist=32814),NONE(dist=NONE)	scaffold_183	36199	36199	G	A	hom	30
intergenic	gene_10019(dist=33835),NONE(dist=NONE)	fgenesh1_kg.183_#_1_#_Locus14545v2rpkm0.31(dist=33835),NONE(dist=NONE)	scaffold_183	37220	37220	C	T	hom	30
intronic	gene_9242	fgenesh1_kg.184_#_1_#_Locus5457v1rpkm9.94	scaffold_184	1706	1706	G	A	hom	30
upstream	gene_9242	fgenesh1_kg.184_#_1_#_Locus5457v1rpkm9.94	scaffold_184	3157	3157	C	A	hom	30
intergenic	gene_9242(dist=2746),gene_9243(dist=1565)	fgenesh1_kg.184_#_1_#_Locus5457v1rpkm9.94(dist=2746),fgenesh1_pg.184_#_2(dist=1565)	scaffold_184	5186	5186	T	C	hom	30
exonic	gene_9248	fgenesh1_kg.184_#_8_#_Locus3007v2rpkm31.20	scaffold_184	23949	23949	C	T	hom	30
exonic	gene_9249	fgenesh1_kg.184_#_11_#_Locus1362v1rpkm107.71	scaffold_184	25431	25431	C	T	hom	30
exonic	gene_9249	fgenesh1_kg.184_#_11_#_Locus1362v1rpkm107.71	scaffold_184	27165	27165	C	T	hom	30
exonic	gene_9255	CE129533_99577	scaffold_185	4212	4212	G	T	hom	30
exonic	gene_9255	CE129533_99577	scaffold_185	4213	4213	G	T	hom	30
exonic	gene_9255	CE129533_99577	scaffold_185	4215	4215	G	T	hom	30
exonic	gene_9255	CE129533_99577	scaffold_185	4217	4217	G	T	hom	30
exonic	gene_9255	CE129533_99577	scaffold_185	4223	4223	C	T	hom	30
exonic	gene_9255	CE129533_99577	scaffold_185	4244	4244	C	T	hom	30
exonic	gene_9255	CE129533_99577	scaffold_185	4245	4245	G	T	hom	30
exonic	gene_9255	CE129533_99577	scaffold_185	4247	4247	G	T	hom	30
exonic	gene_9255	CE129533_99577	scaffold_185	4248	4248	C	T	hom	30
downstream	gene_9268	fgenesh1_pm.185_#_9	scaffold_185	25012	25012	A	T	hom	30
exonic	gene_9268	fgenesh1_pm.185_#_9	scaffold_185	25420	25420	T	G	hom	30
intronic	gene_9268	fgenesh1_pm.185_#_9	scaffold_185	26315	26315	A	G	hom	30
intronic	gene_9268	fgenesh1_pm.185_#_9	scaffold_185	26320	26320	A	G	hom	30
upstream	gene_9289	gm1.7503_g	scaffold_186	35730	35730	T	G	hom	30
upstream	gene_9290	fgenesh1_pg.187_#_1	scaffold_187	2043	2043	G	C	hom	30
upstream;downstream	gene_9299,gene_9300;gene_9298	gm1.7511_g,gm1.7512_g;estExt_Genewise1Plus.C_1870023	scaffold_187	21403	21403	A	G	hom	30
intronic	gene_9302	estExt_fgenesh1_pm.C_1870010	scaffold_187	25017	25017	T	C	hom	30
exonic	gene_9303	estExt_Genemark1.C_1870013	scaffold_187	25966	25966	C	T	hom	30
UTR3	gene_9304	estExt_Genewise1Plus.C_1870028	scaffold_187	28055	28055	T	C	hom	30
UTR5	gene_9305	estExt_Genemark1.C_1870015	scaffold_187	30340	30340	A	C	hom	30
upstream	gene_9306	estExt_Genewise1.C_1870029	scaffold_187	31781	31781	C	T	hom	30
intergenic	gene_9306(dist=1278),NONE(dist=NONE)	estExt_Genewise1.C_1870029(dist=1278),NONE(dist=NONE)	scaffold_187	36192	36192	C	T	hom	30
exonic	gene_9307	estExt_Genemark1.C_1880001	scaffold_188	1038	1038	G	T	hom	30
exonic	gene_9308	estExt_Genemark1.C_1880002,fgenesh1_kg.188_#_2_#_Locus6469v1rpkm5.71	scaffold_188	3236	3236	C	T	hom	30
exonic	gene_9311	fgenesh1_kg.188_#_5_#_Locus8490v1rpkm2.29	scaffold_188	15426	15426	G	A	hom	30
upstream	gene_9316	estExt_Genemark1.C_1880006	scaffold_188	22315	22315	G	A	hom	30
upstream	gene_9316	estExt_Genemark1.C_1880006	scaffold_188	22316	22316	C	A	hom	30
upstream	gene_9316	estExt_Genemark1.C_1880006	scaffold_188	22318	22318	G	T	hom	30
upstream	gene_9316	estExt_Genemark1.C_1880006	scaffold_188	22340	22340	A	G	hom	30
intronic	gene_9317	e_gw1.188.24.1	scaffold_188	24172	24172	A	G	hom	30
exonic	gene_9319	gm1.7528_g	scaffold_188	29043	29043	C	T	hom	30
upstream;downstream	gene_9320;gene_9321	gm1.7529_g;gm1.7530_g	scaffold_188	32612	32612	A	G	hom	30
upstream	gene_2269	fgenesh1_kg.19_#_1_#_Locus14934v1rpkm0.42	scaffold_19	3104	3104	C	A	hom	30
upstream	gene_2269	fgenesh1_kg.19_#_1_#_Locus14934v1rpkm0.42	scaffold_19	3526	3526	A	G	hom	30
upstream	gene_2269	fgenesh1_kg.19_#_1_#_Locus14934v1rpkm0.42	scaffold_19	3529	3529	A	G	hom	30
upstream	gene_2269	fgenesh1_kg.19_#_1_#_Locus14934v1rpkm0.42	scaffold_19	3542	3542	A	G	hom	30
upstream	gene_2271	fgenesh1_pm.19_#_1	scaffold_19	3879	3879	T	C	hom	30
intronic	gene_2271	fgenesh1_pm.19_#_1	scaffold_19	5092	5092	C	T	hom	30
exonic	gene_2271	fgenesh1_pm.19_#_1	scaffold_19	6649	6649	A	G	hom	30
upstream;downstream	gene_2272;gene_2271	estExt_Genewise1.C_190003;fgenesh1_pm.19_#_1	scaffold_19	8251	8251	C	T	hom	30
upstream;downstream	gene_2272;gene_2271	estExt_Genewise1.C_190003;fgenesh1_pm.19_#_1	scaffold_19	8255	8255	C	T	hom	30
upstream;downstream	gene_2272;gene_2271	estExt_Genewise1.C_190003;fgenesh1_pm.19_#_1	scaffold_19	8256	8256	A	T	hom	30
upstream;downstream	gene_2272;gene_2271	estExt_Genewise1.C_190003;fgenesh1_pm.19_#_1	scaffold_19	8258	8258	C	T	hom	30
upstream;downstream	gene_2272;gene_2271	estExt_Genewise1.C_190003;fgenesh1_pm.19_#_1	scaffold_19	8262	8262	G	T	hom	30
upstream;downstream	gene_2272;gene_2271	estExt_Genewise1.C_190003;fgenesh1_pm.19_#_1	scaffold_19	8264	8264	C	T	hom	30
upstream;downstream	gene_2272;gene_2271	estExt_Genewise1.C_190003;fgenesh1_pm.19_#_1	scaffold_19	8265	8265	C	T	hom	30
upstream;downstream	gene_2272;gene_2271	estExt_Genewise1.C_190003;fgenesh1_pm.19_#_1	scaffold_19	8267	8267	G	A	hom	30
upstream;downstream	gene_2272;gene_2271	estExt_Genewise1.C_190003;fgenesh1_pm.19_#_1	scaffold_19	8268	8268	G	T	hom	30
upstream;downstream	gene_2272;gene_2271	estExt_Genewise1.C_190003;fgenesh1_pm.19_#_1	scaffold_19	8269	8269	A	T	hom	30
upstream;downstream	gene_2272;gene_2271	estExt_Genewise1.C_190003;fgenesh1_pm.19_#_1	scaffold_19	8270	8270	G	T	hom	30
upstream;downstream	gene_2272;gene_2271	estExt_Genewise1.C_190003;fgenesh1_pm.19_#_1	scaffold_19	8275	8275	C	T	hom	30
intronic	gene_2273	e_gw1.19.242.1	scaffold_19	12356	12356	A	G	hom	30
UTR3	gene_2276	estExt_Genewise1Plus.C_190008	scaffold_19	17864	17864	G	A	hom	30
exonic	gene_2276	estExt_Genewise1Plus.C_190008	scaffold_19	18564	18564	G	A	hom	30
exonic	gene_2279	e_gw1.19.236.1	scaffold_19	22185	22185	C	T	hom	30
upstream	gene_2286	fgenesh1_pg.19_#_11	scaffold_19	38392	38392	A	T	hom	30
upstream	gene_2286	fgenesh1_pg.19_#_11	scaffold_19	38393	38393	T	C	hom	30
exonic	gene_2299	fgenesh1_kg.19_#_43_#_Locus3581v1rpkm26.77	scaffold_19	62092	62092	A	G	hom	30
exonic	gene_2300	gm1.1850_g	scaffold_19	63577	63577	G	C	hom	30
upstream	gene_2307	fgenesh1_pg.19_#_29	scaffold_19	81095	81095	A	G	hom	30
exonic	gene_2314	estExt_fgenesh1_pm.C_190027	scaffold_19	91689	91689	A	G	hom	30
UTR3	gene_2333	fgenesh1_kg.19_#_73_#_Locus1220v2rpkm13.01	scaffold_19	135527	135527	T	C	hom	30
exonic	gene_2336	e_gw1.19.198.1	scaffold_19	146388	146388	A	G	hom	30
exonic	gene_2357	fgenesh1_kg.19_#_110_#_Locus1041v1rpkm149.37	scaffold_19	195398	195398	C	A	hom	30
exonic	gene_2362	estExt_Genewise1.C_190189	scaffold_19	207837	207837	T	C	hom	30
intronic	gene_2364	fgenesh1_pm.19_#_69	scaffold_19	214341	214341	G	T	hom	30
intronic	gene_2364	fgenesh1_pm.19_#_69	scaffold_19	214347	214347	G	T	hom	30
UTR3	gene_2373,gene_2374	fgenesh1_kg.19_#_128_#_Locus506v1rpkm350.67,fgenesh1_kg.19_#_129_#_Locus506v3rpkm0.99_PRE	scaffold_19	234873	234873	G	A	hom	30
exonic	gene_9377	estExt_Genewise1Plus.C_1920012	scaffold_192	8426	8426	G	A	hom	30
exonic	gene_9377	estExt_Genewise1Plus.C_1920012	scaffold_192	8427	8427	C	T	hom	30
exonic	gene_9386	fgenesh1_kg.192_#_12_#_Locus5580v3rpkm1.07	scaffold_192	32272	32272	T	C	hom	30
exonic	gene_9390	estExt_fgenesh1_pm.C_1930003	scaffold_193	4526	4526	C	T	hom	30
intergenic	gene_9391(dist=3055),gene_9393(dist=2845)	estExt_fgenesh1_pm.C_1930004(dist=3055),gw1.193.29.1(dist=2845)	scaffold_193	9985	9985	C	T	hom	30
exonic	gene_9393	gw1.193.29.1	scaffold_193	12867	12867	A	G	hom	30
exonic	gene_9403	e_gw1.193.5.1	scaffold_193	30267	30267	A	G	hom	30
upstream;downstream	gene_9405;gene_9406,gene_9407	fgenesh1_kg.193_#_18_#_Locus1506v4rpkm0.00_PRE;CE140906_11385,CE141050_5037	scaffold_193	33227	33227	A	C	hom	30
upstream	gene_9424	fgenesh1_pm.195_#_1	scaffold_195	242	242	G	A	hom	30
exonic	gene_9431	gm1.7613_g	scaffold_195	20980	20980	A	G	hom	30
exonic	gene_9431	gm1.7613_g	scaffold_195	20989	20989	G	A	hom	30
upstream;downstream	gene_9432;gene_9433	e_gw1.195.20.1;e_gw1.195.8.1	scaffold_195	25714	25714	T	C	hom	30
intergenic	NONE(dist=NONE),gene_9437(dist=1904)	NONE(dist=NONE),gm1.7618_g(dist=1904)	scaffold_196	17	17	G	T	hom	30
exonic	gene_9437	gm1.7618_g	scaffold_196	6405	6405	G	A	hom	30
exonic	gene_9447	e_gw1.196.5.1	scaffold_196	24964	24964	C	A	hom	30
upstream;downstream	gene_9472;gene_9471	CE142652_704;gm1.7642_g	scaffold_198	6411	6411	G	A	hom	30
upstream	gene_9476	fgenesh1_pm.198_#_4	scaffold_198	17157	17157	G	A	hom	30
upstream	gene_9477	e_gw1.198.7.1	scaffold_198	17834	17834	T	C	hom	30
UTR5	gene_9480	fgenesh1_kg.198_#_13_#_Locus1044v2rpkm2.50_PRE	scaffold_198	24359	24359	T	C	hom	30
downstream	gene_9483	fgenesh1_kg.198_#_16_#_Locus1905v1rpkm69.43	scaffold_198	32316	32316	A	G	hom	30
exonic	gene_9495	e_gw1.199.28.1	scaffold_199	28986	28986	G	T	hom	30
upstream	gene_171	fgenesh1_kg.2_#_20_#_Locus8550v1rpkm2.25	scaffold_2	30514	30514	G	A	hom	30
downstream	gene_172	estExt_fgenesh1_pm.C_20008	scaffold_2	31775	31775	T	C	hom	30
exonic	gene_172	estExt_fgenesh1_pm.C_20008	scaffold_2	31785	31785	T	C	hom	30
exonic	gene_172	estExt_fgenesh1_pm.C_20008	scaffold_2	31792	31792	T	C	hom	30
exonic	gene_178	gm1.145_g	scaffold_2	44928	44928	C	A	hom	30
downstream	gene_184,gene_185	MIX7645_24382_34,fgenesh1_pg.2_#_26	scaffold_2	61078	61078	G	C	hom	30
downstream	gene_184,gene_185	MIX7645_24382_34,fgenesh1_pg.2_#_26	scaffold_2	61136	61136	A	T	hom	30
exonic	gene_189	estExt_Genewise1Plus.C_20059	scaffold_2	83877	83877	T	A	hom	30
intronic	gene_196	gm1.161_g	scaffold_2	98802	98802	C	G	hom	30
intronic	gene_196	gm1.161_g	scaffold_2	98803	98803	T	C	hom	30
upstream	gene_197,gene_198	e_gw1.2.112.1,fgenesh1_kg.2_#_52_#_Locus5740v1rpkm8.44	scaffold_2	101876	101876	T	C	hom	30
UTR5	gene_199	fgenesh1_kg.2_#_54_#_Locus2312v1rpkm52.67	scaffold_2	107685	107685	A	G	hom	30
UTR5	gene_203	fgenesh1_kg.2_#_55_#_Locus5239v3rpkm2.44	scaffold_2	112592	112592	T	A	hom	30
upstream	gene_207	fgenesh1_pm.2_#_33	scaffold_2	125108	125108	C	T	hom	30
upstream	gene_207	fgenesh1_pm.2_#_33	scaffold_2	125154	125154	G	T	hom	30
upstream	gene_207	fgenesh1_pm.2_#_33	scaffold_2	125898	125898	G	A	hom	30
exonic	gene_228	fgenesh1_pg.2_#_62	scaffold_2	163027	163027	G	A	hom	30
downstream	gene_242	estExt_Genewise1Plus.C_20139	scaffold_2	197454	197454	A	G	hom	30
UTR3	gene_249	fgenesh1_kg.2_#_100_#_Locus820v2rpkm23.74	scaffold_2	215929	215929	G	A	hom	30
exonic	gene_254	e_gw1.2.229.1	scaffold_2	231483	231483	G	T	hom	30
upstream;downstream	gene_258;gene_257	CE147229_1253;fgenesh1_kg.2_#_111_#_Locus886v1rpkm181.12	scaffold_2	237537	237537	T	C	hom	30
upstream;downstream	gene_258;gene_257	CE147229_1253;fgenesh1_kg.2_#_111_#_Locus886v1rpkm181.12	scaffold_2	237996	237996	G	T	hom	30
upstream;downstream	gene_259;gene_258	fgenesh1_pm.2_#_62;CE147229_1253	scaffold_2	239684	239684	G	A	hom	30
exonic	gene_267	gm1.221_g	scaffold_2	257897	257897	G	A	hom	30
exonic	gene_274	estExt_Genewise1Plus.C_20185	scaffold_2	265793	265793	C	T	hom	30
intronic	gene_275	fgenesh1_kg.2_#_137_#_Locus5074v2rpkm5.66	scaffold_2	267778	267778	A	G	hom	30
intronic	gene_278	estExt_fgenesh1_pm.C_20068	scaffold_2	272767	272767	T	C	hom	30
upstream	gene_279,gene_280	estExt_Genemark1.C_20106,fgenesh1_kg.2_#_141_#_Locus3802v1rpkm24.12	scaffold_2	276527	276527	A	C	hom	30
exonic	gene_282	fgenesh1_pg.2_#_98	scaffold_2	284521	284521	A	C	hom	30
exonic	gene_282	fgenesh1_pg.2_#_98	scaffold_2	284536	284536	C	T	hom	30
exonic	gene_293	estExt_fgenesh1_pm.C_20073	scaffold_2	302968	302968	G	T	hom	30
exonic	gene_294	fgenesh1_kg.2_#_159_#_Locus1834v2rpkm1.64_PRE,gm1.243_g	scaffold_2	305926	305926	C	T	hom	30
upstream;downstream	gene_295;gene_296	fgenesh1_kg.2_#_159_#_Locus1834v2rpkm1.64_PRE;fgenesh1_kg.2_#_160_#_Locus7342v3rpkm0.75	scaffold_2	307749	307749	T	C	hom	30
upstream	gene_300	CE148261_309	scaffold_2	312157	312157	T	G	hom	30
upstream	gene_300	CE148261_309	scaffold_2	312179	312179	C	T	hom	30
exonic	gene_301	CE148512_6712	scaffold_2	313670	313670	T	C	hom	30
exonic	gene_301	CE148512_6712	scaffold_2	315528	315528	C	A	hom	30
intronic	gene_304	CE148599_20075	scaffold_2	322416	322416	T	C	hom	30
upstream	gene_309	CE148571_5741	scaffold_2	326864	326864	T	C	hom	30
intergenic	gene_309(dist=3156),gene_312(dist=3169)	CE148571_5741(dist=3156),fgenesh1_kg.2_#_179_#_Locus9888v1rpkm1.50(dist=3169)	scaffold_2	332403	332403	T	A	hom	30
intergenic	gene_309(dist=3400),gene_312(dist=2925)	CE148571_5741(dist=3400),fgenesh1_kg.2_#_179_#_Locus9888v1rpkm1.50(dist=2925)	scaffold_2	332647	332647	G	A	hom	30
intergenic	gene_309(dist=4124),gene_312(dist=2201)	CE148571_5741(dist=4124),fgenesh1_kg.2_#_179_#_Locus9888v1rpkm1.50(dist=2201)	scaffold_2	333371	333371	C	T	hom	30
exonic	gene_312	fgenesh1_kg.2_#_179_#_Locus9888v1rpkm1.50	scaffold_2	336542	336542	G	A	hom	30
exonic	gene_315	fgenesh1_pm.2_#_83	scaffold_2	344591	344591	C	A	hom	30
downstream	gene_315	fgenesh1_pm.2_#_83	scaffold_2	346169	346169	C	T	hom	30
exonic	gene_327	e_gw1.2.169.1	scaffold_2	369452	369452	G	A	hom	30
upstream	gene_2380	fgenesh1_pg.20_#_3	scaffold_20	7070	7070	G	A	hom	30
upstream	gene_2391,gene_2392	e_gw1.20.75.1,gw1.20.11.1	scaffold_20	29695	29695	A	T	hom	30
exonic	gene_2408	e_gw1.20.131.1	scaffold_20	68297	68297	A	G	hom	30
upstream	gene_2412,gene_2413	estExt_Genewise1.C_200056,estExt_fgenesh1_pg.C_200031	scaffold_20	79514	79514	C	A	hom	30
downstream	gene_2418	fgenesh1_kg.20_#_37_#_Locus251v2rpkm327.83	scaffold_20	94155	94155	A	T	hom	30
downstream	gene_2418	fgenesh1_kg.20_#_37_#_Locus251v2rpkm327.83	scaffold_20	94221	94221	T	C	hom	30
exonic	gene_2423	fgenesh1_kg.20_#_42_#_Locus1159v1rpkm132.52	scaffold_20	106885	106885	C	T	hom	30
downstream	gene_2437	fgenesh1_kg.20_#_56_#_Locus6207v1rpkm6.63	scaffold_20	136358	136358	G	T	hom	30
downstream	gene_2437	fgenesh1_kg.20_#_56_#_Locus6207v1rpkm6.63	scaffold_20	136359	136359	A	T	hom	30
downstream	gene_2437	fgenesh1_kg.20_#_56_#_Locus6207v1rpkm6.63	scaffold_20	136361	136361	A	T	hom	30
downstream	gene_2437	fgenesh1_kg.20_#_56_#_Locus6207v1rpkm6.63	scaffold_20	136366	136366	A	T	hom	30
downstream	gene_2437	fgenesh1_kg.20_#_56_#_Locus6207v1rpkm6.63	scaffold_20	136367	136367	G	T	hom	30
downstream	gene_2437	fgenesh1_kg.20_#_56_#_Locus6207v1rpkm6.63	scaffold_20	136369	136369	A	T	hom	30
downstream	gene_2437	fgenesh1_kg.20_#_56_#_Locus6207v1rpkm6.63	scaffold_20	136370	136370	A	T	hom	30
downstream	gene_2437	fgenesh1_kg.20_#_56_#_Locus6207v1rpkm6.63	scaffold_20	136371	136371	G	T	hom	30
downstream	gene_2437	fgenesh1_kg.20_#_56_#_Locus6207v1rpkm6.63	scaffold_20	136374	136374	C	T	hom	30
intergenic	gene_2439(dist=2920),gene_2440(dist=3770)	CE151711_8743(dist=2920),estExt_fgenesh1_pg.C_200052(dist=3770)	scaffold_20	142336	142336	T	C	hom	30
intergenic	gene_2439(dist=5355),gene_2440(dist=1335)	CE151711_8743(dist=5355),estExt_fgenesh1_pg.C_200052(dist=1335)	scaffold_20	144771	144771	A	T	hom	30
intergenic	gene_2439(dist=5602),gene_2440(dist=1088)	CE151711_8743(dist=5602),estExt_fgenesh1_pg.C_200052(dist=1088)	scaffold_20	145018	145018	C	T	hom	30
exonic	gene_2449	fgenesh1_kg.20_#_71_#_Locus1024v2rpkm0.98_PRE	scaffold_20	167649	167649	T	G	hom	30
exonic	gene_2453	estExt_fgenesh1_pg.C_200061	scaffold_20	175691	175691	G	A	hom	30
downstream	gene_2455,gene_2456	e_gw1.20.48.1,fgenesh1_kg.20_#_78_#_Locus7345v1rpkm3.58	scaffold_20	184799	184799	T	A	hom	30
exonic	gene_2466	gm1.1991_g	scaffold_20	209837	209837	A	G	hom	30
UTR3	gene_2467	estExt_fgenesh1_pg.C_200074	scaffold_20	213498	213498	T	C	hom	30
exonic	gene_2469	CE152559_36224	scaffold_20	218474	218474	T	C	hom	30
upstream	gene_2469	CE152559_36224	scaffold_20	220240	220240	A	C	hom	30
exonic	gene_2471	estExt_fgenesh1_pm.C_200050	scaffold_20	223818	223818	C	T	hom	30
exonic	gene_9504	fgenesh1_pg.200_#_6	scaffold_200	13741	13741	A	G	hom	30
UTR5	gene_9510	fgenesh1_kg.200_#_19_#_Locus5231v1rpkm11.16	scaffold_200	29128	29128	T	C	hom	30
exonic	gene_9533	e_gw1.202.2.1	scaffold_202	14820	14820	T	C	hom	30
exonic	gene_9536	estExt_fgenesh1_pg.C_2020008	scaffold_202	20713	20713	C	T	hom	30
exonic	gene_9536	estExt_fgenesh1_pg.C_2020008	scaffold_202	22677	22677	C	T	hom	30
upstream;downstream	gene_9538;gene_9539	estExt_Genemark1.C_2030001;fgenesh1_pm.203_#_2	scaffold_203	4619	4619	T	C	hom	30
UTR5	gene_9541	fgenesh1_kg.203_#_3_#_Locus792v1rpkm209.47	scaffold_203	9062	9062	G	A	hom	30
exonic	gene_9542	fgenesh1_pg.203_#_5	scaffold_203	12652	12652	C	A	hom	30
exonic	gene_9544	estExt_Genewise1.C_2030019	scaffold_203	22544	22544	G	A	hom	30
exonic	gene_9556	fgenesh1_kg.205_#_1_#_Locus2217v1rpkm56.29	scaffold_205	6474	6474	C	T	hom	30
exonic	gene_9560	CE155461_1389	scaffold_205	14798	14798	T	C	hom	30
exonic	gene_9560	CE155461_1389	scaffold_205	14947	14947	T	C	hom	30
exonic	gene_9563	fgenesh1_kg.205_#_7_#_Locus4051v1rpkm21.29	scaffold_205	24170	24170	G	A	hom	30
intronic	gene_9591	fgenesh1_pm.208_#_4	scaffold_208	9771	9771	T	C	hom	30
intronic	gene_9591	fgenesh1_pm.208_#_4	scaffold_208	11866	11866	G	T	hom	30
intronic	gene_9591	fgenesh1_pm.208_#_4	scaffold_208	11870	11870	C	T	hom	30
intronic	gene_9591	fgenesh1_pm.208_#_4	scaffold_208	11872	11872	G	T	hom	30
intronic	gene_9591	fgenesh1_pm.208_#_4	scaffold_208	11879	11879	A	T	hom	30
intronic	gene_9591	fgenesh1_pm.208_#_4	scaffold_208	11880	11880	A	G	hom	30
intronic	gene_9591	fgenesh1_pm.208_#_4	scaffold_208	11881	11881	T	C	hom	30
exonic	gene_9594	estExt_Genewise1Plus.C_2080022	scaffold_208	19924	19924	G	A	hom	30
upstream	gene_2491,gene_2492	fgenesh1_kg.21_#_17_#_Locus6043v1rpkm7.21,fgenesh1_pg.21_#_15	scaffold_21	39659	39659	G	C	hom	30
downstream	gene_2502	estExt_Genemark1.C_210026	scaffold_21	70269	70269	A	G	hom	30
exonic	gene_2503	estExt_fgenesh1_pm.C_210019	scaffold_21	73016	73016	T	C	hom	30
intronic	gene_2511	estExt_Genemark1.C_210035	scaffold_21	94024	94024	G	C	hom	30
intronic	gene_2511	estExt_Genemark1.C_210035	scaffold_21	94026	94026	G	C	hom	30
intronic	gene_2511	estExt_Genemark1.C_210035	scaffold_21	94027	94027	T	C	hom	30
intronic	gene_2511	estExt_Genemark1.C_210035	scaffold_21	94029	94029	T	C	hom	30
intronic	gene_2511	estExt_Genemark1.C_210035	scaffold_21	94033	94033	T	A	hom	30
intronic	gene_2511	estExt_Genemark1.C_210035	scaffold_21	94035	94035	C	A	hom	30
intronic	gene_2511	estExt_Genemark1.C_210035	scaffold_21	94036	94036	C	A	hom	30
intronic	gene_2511	estExt_Genemark1.C_210035	scaffold_21	94038	94038	C	A	hom	30
intronic	gene_2511	estExt_Genemark1.C_210035	scaffold_21	94040	94040	G	A	hom	30
exonic	gene_2542	fgenesh1_kg.21_#_74_#_Locus4952v6rpkm0.00_PRE	scaffold_21	165347	165347	A	G	hom	30
intronic	gene_2544	e_gw1.21.4.1	scaffold_21	170934	170934	T	G	hom	30
intronic	gene_2544	e_gw1.21.4.1	scaffold_21	170936	170936	T	G	hom	30
downstream	gene_2563	gm1.2080_g	scaffold_21	216732	216732	G	A	hom	30
downstream	gene_2563	gm1.2080_g	scaffold_21	216745	216745	T	A	hom	30
upstream	gene_9609	fgenesh1_kg.210_#_1_#_Locus5313v1rpkm10.72	scaffold_210	323	323	G	T	hom	30
exonic	gene_9634	gm1.7777_g	scaffold_212	3209	3209	C	T	hom	30
upstream;downstream	gene_9638;gene_9639	gm1.7781_g;CE163673_19	scaffold_212	12544	12544	C	T	hom	30
upstream;downstream	gene_9638;gene_9639	gm1.7781_g;CE163673_19	scaffold_212	12563	12563	C	T	hom	30
upstream;downstream	gene_9638;gene_9639	gm1.7781_g;CE163673_19	scaffold_212	12568	12568	G	A	hom	30
upstream;downstream	gene_9638;gene_9639	gm1.7781_g;CE163673_19	scaffold_212	12572	12572	A	C	hom	30
upstream;downstream	gene_9638;gene_9639	gm1.7781_g;CE163673_19	scaffold_212	12573	12573	G	A	hom	30
intergenic	gene_9639(dist=1374),gene_9640(dist=4543)	CE163673_19(dist=1374),estExt_Genemark1.C_2120007(dist=4543)	scaffold_212	13779	13779	G	A	hom	30
intergenic	gene_9639(dist=1783),gene_9640(dist=4134)	CE163673_19(dist=1783),estExt_Genemark1.C_2120007(dist=4134)	scaffold_212	14188	14188	G	A	hom	30
intergenic	gene_9639(dist=1791),gene_9640(dist=4126)	CE163673_19(dist=1791),estExt_Genemark1.C_2120007(dist=4126)	scaffold_212	14196	14196	G	A	hom	30
intergenic	gene_9639(dist=3270),gene_9640(dist=2647)	CE163673_19(dist=3270),estExt_Genemark1.C_2120007(dist=2647)	scaffold_212	15675	15675	G	A	hom	30
intergenic	gene_9639(dist=3511),gene_9640(dist=2406)	CE163673_19(dist=3511),estExt_Genemark1.C_2120007(dist=2406)	scaffold_212	15916	15916	G	A	hom	30
intergenic	gene_9639(dist=3557),gene_9640(dist=2360)	CE163673_19(dist=3557),estExt_Genemark1.C_2120007(dist=2360)	scaffold_212	15962	15962	C	T	hom	30
intergenic	gene_9639(dist=3558),gene_9640(dist=2359)	CE163673_19(dist=3558),estExt_Genemark1.C_2120007(dist=2359)	scaffold_212	15963	15963	A	G	hom	30
intergenic	gene_9639(dist=3560),gene_9640(dist=2357)	CE163673_19(dist=3560),estExt_Genemark1.C_2120007(dist=2357)	scaffold_212	15965	15965	C	T	hom	30
intergenic	gene_9639(dist=3561),gene_9640(dist=2356)	CE163673_19(dist=3561),estExt_Genemark1.C_2120007(dist=2356)	scaffold_212	15966	15966	A	G	hom	30
intergenic	gene_9639(dist=3596),gene_9640(dist=2321)	CE163673_19(dist=3596),estExt_Genemark1.C_2120007(dist=2321)	scaffold_212	16001	16001	C	T	hom	30
intergenic	gene_9639(dist=4271),gene_9640(dist=1646)	CE163673_19(dist=4271),estExt_Genemark1.C_2120007(dist=1646)	scaffold_212	16676	16676	C	T	hom	30
downstream	gene_9640	estExt_Genemark1.C_2120007	scaffold_212	17494	17494	C	T	hom	30
downstream	gene_9640	estExt_Genemark1.C_2120007	scaffold_212	17556	17556	A	G	hom	30
downstream	gene_9640	estExt_Genemark1.C_2120007	scaffold_212	17567	17567	A	G	hom	30
intergenic	gene_9641(dist=1383),NONE(dist=NONE)	estExt_Genewise1Plus.C_2120019(dist=1383),NONE(dist=NONE)	scaffold_212	25813	25813	G	A	hom	30
upstream	gene_9645,gene_9646	fgenesh1_kg.213_#_4_#_Locus4165v1rpkm20.29,fgenesh1_kg.213_#_5_#_Locus2776v1rpkm40.37	scaffold_213	8246	8246	C	T	hom	30
exonic	gene_9646	fgenesh1_kg.213_#_5_#_Locus2776v1rpkm40.37	scaffold_213	8729	8729	G	T	hom	30
intergenic	gene_9646(dist=2942),gene_9648(dist=2442)	fgenesh1_kg.213_#_5_#_Locus2776v1rpkm40.37(dist=2942),e_gw1.213.18.1(dist=2442)	scaffold_213	16068	16068	C	T	hom	30
intergenic	gene_9646(dist=2952),gene_9648(dist=2432)	fgenesh1_kg.213_#_5_#_Locus2776v1rpkm40.37(dist=2952),e_gw1.213.18.1(dist=2432)	scaffold_213	16078	16078	C	T	hom	30
upstream	gene_9648	e_gw1.213.18.1	scaffold_213	18228	18228	G	T	hom	30
intronic	gene_9664	fgenesh1_kg.215_#_3_#_Locus1803v1rpkm74.72	scaffold_215	6191	6191	A	G	hom	30
downstream	gene_9666	fgenesh1_kg.215_#_6_#_Locus6523v1rpkm5.51	scaffold_215	11055	11055	T	C	hom	30
upstream;downstream	gene_9670;gene_9669,gene_9671	gw1.215.2.1;CE164489_2579,gw1.215.23.1	scaffold_215	17588	17588	T	C	hom	30
exonic	gene_9679	gm1.7811_g	scaffold_216	12314	12314	G	A	hom	30
UTR5	gene_9690	estExt_Genewise1Plus.C_2170008	scaffold_217	7886	7886	T	C	hom	30
intergenic	gene_9690(dist=1061),gene_9692(dist=1191)	estExt_Genewise1Plus.C_2170008(dist=1061),e_gw1.217.14.1(dist=1191)	scaffold_217	9753	9753	G	A	hom	30
UTR5	gene_9698	CE165527_4125	scaffold_218	953	953	C	T	hom	30
exonic	gene_9701	CE165883_27022	scaffold_218	9733	9733	A	T	hom	30
exonic	gene_9701	CE165883_27022	scaffold_218	11159	11159	A	G	hom	30
downstream	gene_9708	fgenesh1_kg.218_#_13_#_Locus1795v1rpkm75.26	scaffold_218	22761	22761	G	A	hom	30
intergenic	NONE(dist=NONE),NONE(dist=NONE)	NONE(dist=NONE),NONE(dist=NONE)	scaffold_219	4903	4903	T	G	hom	30
intergenic	NONE(dist=NONE),NONE(dist=NONE)	NONE(dist=NONE),NONE(dist=NONE)	scaffold_219	4932	4932	T	C	hom	30
intergenic	NONE(dist=NONE),NONE(dist=NONE)	NONE(dist=NONE),NONE(dist=NONE)	scaffold_219	4940	4940	T	C	hom	30
intergenic	NONE(dist=NONE),NONE(dist=NONE)	NONE(dist=NONE),NONE(dist=NONE)	scaffold_219	5000	5000	C	T	hom	30
intergenic	NONE(dist=NONE),NONE(dist=NONE)	NONE(dist=NONE),NONE(dist=NONE)	scaffold_219	5007	5007	C	T	hom	30
intergenic	NONE(dist=NONE),NONE(dist=NONE)	NONE(dist=NONE),NONE(dist=NONE)	scaffold_219	7651	7651	T	G	hom	30
intergenic	NONE(dist=NONE),NONE(dist=NONE)	NONE(dist=NONE),NONE(dist=NONE)	scaffold_219	14872	14872	A	G	hom	30
intergenic	NONE(dist=NONE),NONE(dist=NONE)	NONE(dist=NONE),NONE(dist=NONE)	scaffold_219	22568	22568	A	G	hom	30
intergenic	NONE(dist=NONE),NONE(dist=NONE)	NONE(dist=NONE),NONE(dist=NONE)	scaffold_219	22589	22589	A	G	hom	30
intergenic	NONE(dist=NONE),NONE(dist=NONE)	NONE(dist=NONE),NONE(dist=NONE)	scaffold_219	22594	22594	A	G	hom	30
upstream	gene_2566,gene_2567	CE166173_21231,estExt_Genewise1Plus.C_220010	scaffold_22	12702	12702	A	G	hom	30
exonic	gene_2571	estExt_Genewise1Plus.C_220019	scaffold_22	23797	23797	C	A	hom	30
intronic	gene_2593	fgenesh1_pm.22_#_20	scaffold_22	61951	61951	T	C	hom	30
exonic	gene_2602	estExt_Genemark1.C_220036	scaffold_22	82489	82489	A	G	hom	30
UTR5	gene_2603	estExt_Genewise1Plus.C_220064	scaffold_22	83354	83354	G	T	hom	30
downstream	gene_2603,gene_2604	estExt_Genewise1Plus.C_220064,fgenesh1_pg.22_#_33	scaffold_22	85512	85512	A	G	hom	30
upstream	gene_2606	gm1.2120_g	scaffold_22	92336	92336	T	G	hom	30
exonic	gene_2611	e_gw1.22.138.1	scaffold_22	102803	102803	T	G	hom	30
exonic	gene_2630	e_gw1.22.1.1	scaffold_22	140846	140846	A	G	hom	30
UTR3	gene_2633	fgenesh1_kg.22_#_78_#_Locus5717v1rpkm8.54	scaffold_22	148738	148738	C	A	hom	30
exonic	gene_2633	fgenesh1_kg.22_#_78_#_Locus5717v1rpkm8.54	scaffold_22	149872	149872	C	A	hom	30
UTR3	gene_2636	fgenesh1_kg.22_#_81_#_Locus1661v1rpkm84.44	scaffold_22	158679	158679	A	G	hom	30
upstream;downstream	gene_2644;gene_2643	fgenesh1_kg.22_#_87_#_Locus13825v1rpkm0.58;estExt_fgenesh1_pg.C_220066	scaffold_22	179747	179747	G	A	hom	30
intergenic	gene_2658(dist=1188),NONE(dist=NONE)	gm1.2165_g(dist=1188),NONE(dist=NONE)	scaffold_22	215997	215997	A	G	hom	30
exonic	gene_9709	e_gw1.220.20.1	scaffold_220	2290	2290	C	T	hom	30
intronic	gene_9712	e_gw1.220.8.1	scaffold_220	6630	6630	T	A	hom	30
intronic	gene_9712	e_gw1.220.8.1	scaffold_220	6631	6631	G	A	hom	30
exonic	gene_9713	estExt_fgenesh1_pm.C_2200003	scaffold_220	9218	9218	G	A	hom	30
intronic	gene_9713	estExt_fgenesh1_pm.C_2200003	scaffold_220	9394	9394	C	T	hom	30
exonic	gene_9726	gm1.7846_g	scaffold_221	9455	9455	G	A	hom	30
upstream	gene_9729,gene_9731	CE169452_160,fgenesh1_kg.221_#_11_#_Locus7826v4rpkm0.00_PRE	scaffold_221	18344	18344	T	G	hom	30
exonic	gene_9754	fgenesh1_kg.224_#_1_#_Locus3806v1rpkm24.05	scaffold_224	1852	1852	G	T	hom	30
upstream	gene_9757	fgenesh1_kg.224_#_3_#_Locus2599v1rpkm44.65	scaffold_224	5857	5857	G	A	hom	30
exonic	gene_9757	fgenesh1_kg.224_#_3_#_Locus2599v1rpkm44.65	scaffold_224	9484	9484	A	G	hom	30
downstream	gene_9757,gene_9758,gene_9759	CE170215_253,estExt_Genemark1.C_2240005,fgenesh1_kg.224_#_3_#_Locus2599v1rpkm44.65	scaffold_224	10417	10417	G	A	hom	30
intronic	gene_9777	fgenesh1_pg.226_#_5	scaffold_226	14581	14581	A	G	hom	30
exonic	gene_9777	fgenesh1_pg.226_#_5	scaffold_226	14612	14612	C	G	hom	30
exonic	gene_9777	fgenesh1_pg.226_#_5	scaffold_226	14623	14623	A	G	hom	30
exonic	gene_9777	fgenesh1_pg.226_#_5	scaffold_226	14641	14641	T	G	hom	30
exonic	gene_9777	fgenesh1_pg.226_#_5	scaffold_226	14647	14647	C	G	hom	30
exonic	gene_9777	fgenesh1_pg.226_#_5	scaffold_226	14648	14648	A	G	hom	30
exonic	gene_9785	estExt_fgenesh1_pg.C_2270005	scaffold_227	16330	16330	G	A	hom	30
upstream;downstream	gene_9785;gene_9786	estExt_fgenesh1_pg.C_2270005;gm1.7886_g	scaffold_227	17211	17211	C	A	hom	30
upstream;downstream	gene_9785;gene_9786	estExt_fgenesh1_pg.C_2270005;gm1.7886_g	scaffold_227	17212	17212	T	A	hom	30
upstream;downstream	gene_9785;gene_9786	estExt_fgenesh1_pg.C_2270005;gm1.7886_g	scaffold_227	17214	17214	C	A	hom	30
upstream;downstream	gene_9785;gene_9786	estExt_fgenesh1_pg.C_2270005;gm1.7886_g	scaffold_227	17215	17215	T	A	hom	30
upstream;downstream	gene_9785;gene_9786	estExt_fgenesh1_pg.C_2270005;gm1.7886_g	scaffold_227	17217	17217	T	A	hom	30
exonic	gene_9788	gm1.7887_g	scaffold_228	2656	2656	T	A	hom	30
exonic	gene_9788	gm1.7887_g	scaffold_228	2657	2657	G	A	hom	30
exonic	gene_9790	fgenesh1_pm.228_#_2	scaffold_228	5272	5272	C	T	hom	30
intronic	gene_9798	gm1.7894_g	scaffold_229	3017	3017	A	G	hom	30
upstream;downstream	gene_2659;gene_2660	fgenesh1_kg.23_#_1_#_Locus2176v1rpkm57.60;estExt_Genewise1Plus.C_230004	scaffold_23	226	226	G	T	hom	30
exonic	gene_2665	fgenesh1_kg.23_#_9_#_Locus1245v1rpkm121.20	scaffold_23	10454	10454	C	T	hom	30
UTR3	gene_2665	fgenesh1_kg.23_#_9_#_Locus1245v1rpkm121.20	scaffold_23	10988	10988	C	T	hom	30
UTR3	gene_2665	fgenesh1_kg.23_#_9_#_Locus1245v1rpkm121.20	scaffold_23	10990	10990	G	T	hom	30
UTR3	gene_2665	fgenesh1_kg.23_#_9_#_Locus1245v1rpkm121.20	scaffold_23	10994	10994	C	T	hom	30
UTR3	gene_2665	fgenesh1_kg.23_#_9_#_Locus1245v1rpkm121.20	scaffold_23	10995	10995	A	T	hom	30
UTR3	gene_2665	fgenesh1_kg.23_#_9_#_Locus1245v1rpkm121.20	scaffold_23	10996	10996	G	T	hom	30
UTR3	gene_2665	fgenesh1_kg.23_#_9_#_Locus1245v1rpkm121.20	scaffold_23	10997	10997	G	T	hom	30
UTR3	gene_2665	fgenesh1_kg.23_#_9_#_Locus1245v1rpkm121.20	scaffold_23	10998	10998	A	T	hom	30
UTR3	gene_2665	fgenesh1_kg.23_#_9_#_Locus1245v1rpkm121.20	scaffold_23	11001	11001	A	T	hom	30
UTR3	gene_2665	fgenesh1_kg.23_#_9_#_Locus1245v1rpkm121.20	scaffold_23	11006	11006	A	T	hom	30
UTR3	gene_2665	fgenesh1_kg.23_#_9_#_Locus1245v1rpkm121.20	scaffold_23	11012	11012	A	T	hom	30
UTR3	gene_2665	fgenesh1_kg.23_#_9_#_Locus1245v1rpkm121.20	scaffold_23	11013	11013	A	T	hom	30
UTR3	gene_2665	fgenesh1_kg.23_#_9_#_Locus1245v1rpkm121.20	scaffold_23	11017	11017	G	T	hom	30
downstream	gene_2665,gene_2667	CE172164_469,fgenesh1_kg.23_#_9_#_Locus1245v1rpkm121.20	scaffold_23	11019	11019	C	T	hom	30
UTR5	gene_2667	CE172164_469	scaffold_23	12263	12263	A	T	hom	30
downstream	gene_2668	e_gw1.23.114.1	scaffold_23	17000	17000	G	T	hom	30
exonic	gene_2678	e_gw1.23.157.1	scaffold_23	40722	40722	C	T	hom	30
exonic	gene_2679	gm1.2179_g	scaffold_23	42808	42808	C	T	hom	30
intergenic	gene_2679(dist=1060),gene_2680(dist=3188)	gm1.2179_g(dist=1060),gm1.2180_g(dist=3188)	scaffold_23	44138	44138	T	C	hom	30
intergenic	gene_2679(dist=1080),gene_2680(dist=3168)	gm1.2179_g(dist=1080),gm1.2180_g(dist=3168)	scaffold_23	44158	44158	G	T	hom	30
intergenic	gene_2679(dist=1092),gene_2680(dist=3156)	gm1.2179_g(dist=1092),gm1.2180_g(dist=3156)	scaffold_23	44170	44170	A	G	hom	30
intergenic	gene_2679(dist=1094),gene_2680(dist=3154)	gm1.2179_g(dist=1094),gm1.2180_g(dist=3154)	scaffold_23	44172	44172	T	C	hom	30
intergenic	gene_2679(dist=1218),gene_2680(dist=3030)	gm1.2179_g(dist=1218),gm1.2180_g(dist=3030)	scaffold_23	44296	44296	A	T	hom	30
UTR3	gene_2695	estExt_fgenesh1_pg.C_230026	scaffold_23	81322	81322	T	C	hom	30
intergenic	gene_2697(dist=1383),gene_2700(dist=3792)	fgenesh1_kg.23_#_42_#_Locus2732v1rpkm41.16(dist=1383),fgenesh1_pm.23_#_24(dist=3792)	scaffold_23	86968	86968	T	C	hom	30
exonic	gene_2702	gm1.2199_g	scaffold_23	97753	97753	A	G	hom	30
exonic	gene_2707	estExt_Genewise1.C_230082	scaffold_23	106830	106830	G	A	hom	30
intronic	gene_2756	fgenesh1_kg.23_#_104_#_Locus691v1rpkm239.20	scaffold_23	205422	205422	C	T	hom	30
intronic	gene_2756	fgenesh1_kg.23_#_104_#_Locus691v1rpkm239.20	scaffold_23	205426	205426	C	A	hom	30
exonic	gene_2757	fgenesh1_kg.23_#_105_#_Locus914v1rpkm174.48	scaffold_23	206719	206719	T	C	hom	30
UTR3	gene_9809	fgenesh1_kg.231_#_3_#_Locus1264v2rpkm2.70_PRE	scaffold_231	983	983	G	T	hom	30
exonic	gene_9815	fgenesh1_pg.231_#_5	scaffold_231	11640	11640	G	A	hom	30
exonic	gene_9816	estExt_Genemark1.C_2310006	scaffold_231	16010	16010	G	T	hom	30
exonic	gene_9818	fgenesh1_kg.232_#_3_#_Locus5779v1rpkm8.31	scaffold_232	3462	3462	C	T	hom	30
downstream	gene_9818,gene_9819,gene_9820	CE177307_65,estExt_Genewise1.C_2320006,fgenesh1_kg.232_#_3_#_Locus5779v1rpkm8.31	scaffold_232	4938	4938	C	T	hom	30
exonic	gene_9821	fgenesh1_kg.232_#_5_#_Locus4407v1rpkm17.95	scaffold_232	8473	8473	T	C	hom	30
upstream	gene_9823	estExt_Genemark1.C_2320005	scaffold_232	13084	13084	G	A	hom	30
exonic	gene_9826	gm1.7917_g	scaffold_233	6357	6357	G	A	hom	30
exonic	gene_9833	CE177840_579	scaffold_234	2216	2216	C	A	hom	30
downstream	gene_9833	CE177840_579	scaffold_234	3364	3364	G	A	hom	30
downstream	gene_9837	estExt_Genemark1.C_2340005	scaffold_234	15192	15192	A	C	hom	30
intergenic	NONE(dist=NONE),gene_9843(dist=6846)	NONE(dist=NONE),estExt_Genemark1.C_2360001(dist=6846)	scaffold_236	1762	1762	A	G	hom	30
intergenic	NONE(dist=NONE),gene_9843(dist=6389)	NONE(dist=NONE),estExt_Genemark1.C_2360001(dist=6389)	scaffold_236	2219	2219	A	C	hom	30
intergenic	NONE(dist=NONE),gene_9843(dist=2234)	NONE(dist=NONE),estExt_Genemark1.C_2360001(dist=2234)	scaffold_236	6374	6374	T	G	hom	30
exonic	gene_9845	gm1.7933_g	scaffold_237	261	261	G	A	hom	30
intronic	gene_2842	fgenesh1_kg.24_#_71_#_Locus3602v1rpkm26.48	scaffold_24	171180	171180	A	C	hom	30
downstream	gene_2847	estExt_fgenesh1_pm.C_240048	scaffold_24	185916	185916	G	A	hom	30
intergenic	gene_2848(dist=2241),gene_2849(dist=2346)	fgenesh1_kg.24_#_80_#_Locus3738v1rpkm24.92(dist=2241),fgenesh1_pm.24_#_51(dist=2346)	scaffold_24	201575	201575	G	A	hom	30
upstream	gene_2849	fgenesh1_pm.24_#_51	scaffold_24	202940	202940	T	C	hom	30
exonic	gene_2849	fgenesh1_pm.24_#_51	scaffold_24	204500	204500	G	A	hom	30
exonic	gene_2849	fgenesh1_pm.24_#_51	scaffold_24	204506	204506	A	G	hom	30
exonic	gene_2849	fgenesh1_pm.24_#_51	scaffold_24	204509	204509	A	G	hom	30
exonic	gene_2849	fgenesh1_pm.24_#_51	scaffold_24	204514	204514	C	T	hom	30
exonic	gene_2849	fgenesh1_pm.24_#_51	scaffold_24	204515	204515	A	G	hom	30
exonic	gene_2849	fgenesh1_pm.24_#_51	scaffold_24	204535	204535	C	T	hom	30
splicing	gene_2849(mRNA_2849:exon3:c.521+2T>C)	fgenesh1_pm.24_#_51(fgenesh1_pm.24_#_51:exon3:c.521+2T>C)	scaffold_24	204545	204545	T	C	hom	30
intronic	gene_2849	fgenesh1_pm.24_#_51	scaffold_24	204553	204553	G	A	hom	30
intronic	gene_2849	fgenesh1_pm.24_#_51	scaffold_24	204556	204556	C	T	hom	30
intronic	gene_2849	fgenesh1_pm.24_#_51	scaffold_24	204559	204559	C	T	hom	30
intronic	gene_2849	fgenesh1_pm.24_#_51	scaffold_24	204561	204561	C	T	hom	30
intronic	gene_2849	fgenesh1_pm.24_#_51	scaffold_24	204562	204562	A	G	hom	30
intronic	gene_2849	fgenesh1_pm.24_#_51	scaffold_24	204565	204565	G	A	hom	30
intronic	gene_2849	fgenesh1_pm.24_#_51	scaffold_24	204572	204572	T	C	hom	30
intronic	gene_2849	fgenesh1_pm.24_#_51	scaffold_24	204574	204574	G	A	hom	30
intronic	gene_2849	fgenesh1_pm.24_#_51	scaffold_24	204587	204587	T	C	hom	30
intronic	gene_2849	fgenesh1_pm.24_#_51	scaffold_24	204588	204588	G	A	hom	30
intronic	gene_2849	fgenesh1_pm.24_#_51	scaffold_24	204599	204599	A	G	hom	30
intronic	gene_2849	fgenesh1_pm.24_#_51	scaffold_24	204607	204607	G	A	hom	30
intronic	gene_2849	fgenesh1_pm.24_#_51	scaffold_24	204615	204615	C	T	hom	30
intronic	gene_2849	fgenesh1_pm.24_#_51	scaffold_24	204624	204624	A	G	hom	30
intronic	gene_2849	fgenesh1_pm.24_#_51	scaffold_24	204646	204646	G	C	hom	30
intronic	gene_2849	fgenesh1_pm.24_#_51	scaffold_24	204648	204648	T	C	hom	30
intronic	gene_2849	fgenesh1_pm.24_#_51	scaffold_24	204650	204650	T	C	hom	30
intronic	gene_2849	fgenesh1_pm.24_#_51	scaffold_24	204651	204651	C	T	hom	30
intronic	gene_2849	fgenesh1_pm.24_#_51	scaffold_24	204652	204652	A	G	hom	30
intronic	gene_2849	fgenesh1_pm.24_#_51	scaffold_24	204654	204654	A	G	hom	30
exonic	gene_2849	fgenesh1_pm.24_#_51	scaffold_24	204668	204668	A	G	hom	30
exonic	gene_2849	fgenesh1_pm.24_#_51	scaffold_24	204673	204673	C	A	hom	30
exonic	gene_2849	fgenesh1_pm.24_#_51	scaffold_24	204690	204690	C	T	hom	30
exonic	gene_2849	fgenesh1_pm.24_#_51	scaffold_24	204704	204704	G	A	hom	30
exonic	gene_2849	fgenesh1_pm.24_#_51	scaffold_24	204715	204715	G	A	hom	30
exonic	gene_2849	fgenesh1_pm.24_#_51	scaffold_24	204727	204727	C	T	hom	30
exonic	gene_2849	fgenesh1_pm.24_#_51	scaffold_24	204741	204741	C	T	hom	30
exonic	gene_2849	fgenesh1_pm.24_#_51	scaffold_24	204754	204754	G	A	hom	30
exonic	gene_2849	fgenesh1_pm.24_#_51	scaffold_24	204757	204757	G	A	hom	30
exonic	gene_2849	fgenesh1_pm.24_#_51	scaffold_24	204760	204760	C	T	hom	30
exonic	gene_2849	fgenesh1_pm.24_#_51	scaffold_24	204766	204766	G	A	hom	30
exonic	gene_2849	fgenesh1_pm.24_#_51	scaffold_24	204779	204779	G	A	hom	30
exonic	gene_2849	fgenesh1_pm.24_#_51	scaffold_24	204794	204794	T	C	hom	30
exonic	gene_2849	fgenesh1_pm.24_#_51	scaffold_24	204795	204795	G	A	hom	30
exonic	gene_2849	fgenesh1_pm.24_#_51	scaffold_24	204808	204808	T	C	hom	30
exonic	gene_2849	fgenesh1_pm.24_#_51	scaffold_24	204809	204809	G	A	hom	30
exonic	gene_2849	fgenesh1_pm.24_#_51	scaffold_24	204826	204826	A	G	hom	30
exonic	gene_2849	fgenesh1_pm.24_#_51	scaffold_24	204832	204832	G	A	hom	30
exonic	gene_2849	fgenesh1_pm.24_#_51	scaffold_24	204835	204835	C	T	hom	30
exonic	gene_2849	fgenesh1_pm.24_#_51	scaffold_24	204836	204836	A	G	hom	30
exonic	gene_2849	fgenesh1_pm.24_#_51	scaffold_24	204840	204840	C	T	hom	30
exonic	gene_2849	fgenesh1_pm.24_#_51	scaffold_24	204841	204841	A	G	hom	30
exonic	gene_2849	fgenesh1_pm.24_#_51	scaffold_24	204867	204867	G	T	hom	30
exonic	gene_2849	fgenesh1_pm.24_#_51	scaffold_24	204891	204891	A	G	hom	30
exonic	gene_2849	fgenesh1_pm.24_#_51	scaffold_24	204894	204894	C	T	hom	30
exonic	gene_2849	fgenesh1_pm.24_#_51	scaffold_24	204900	204900	T	A	hom	30
exonic	gene_2849	fgenesh1_pm.24_#_51	scaffold_24	204924	204924	G	A	hom	30
exonic	gene_2849	fgenesh1_pm.24_#_51	scaffold_24	204937	204937	G	A	hom	30
exonic	gene_2849	fgenesh1_pm.24_#_51	scaffold_24	204940	204940	C	T	hom	30
exonic	gene_2849	fgenesh1_pm.24_#_51	scaffold_24	204941	204941	T	C	hom	30
splicing	gene_2849(mRNA_2849:exon4:c.797+1G>A)	fgenesh1_pm.24_#_51(fgenesh1_pm.24_#_51:exon4:c.797+1G>A)	scaffold_24	204942	204942	G	A	hom	30
intronic	gene_2849	fgenesh1_pm.24_#_51	scaffold_24	204955	204955	T	A	hom	30
exonic	gene_2849	fgenesh1_pm.24_#_51	scaffold_24	204974	204974	C	T	hom	30
exonic	gene_2849	fgenesh1_pm.24_#_51	scaffold_24	204975	204975	G	A	hom	30
exonic	gene_2849	fgenesh1_pm.24_#_51	scaffold_24	204976	204976	C	T	hom	30
exonic	gene_2849	fgenesh1_pm.24_#_51	scaffold_24	204995	204995	G	A	hom	30
exonic	gene_2849	fgenesh1_pm.24_#_51	scaffold_24	205003	205003	T	C	hom	30
exonic	gene_2849	fgenesh1_pm.24_#_51	scaffold_24	205004	205004	G	A	hom	30
exonic	gene_2849	fgenesh1_pm.24_#_51	scaffold_24	205006	205006	T	C	hom	30
exonic	gene_2849	fgenesh1_pm.24_#_51	scaffold_24	205008	205008	T	C	hom	30
exonic	gene_2849	fgenesh1_pm.24_#_51	scaffold_24	205009	205009	G	A	hom	30
exonic	gene_2849	fgenesh1_pm.24_#_51	scaffold_24	205020	205020	G	A	hom	30
exonic	gene_2849	fgenesh1_pm.24_#_51	scaffold_24	205027	205027	C	T	hom	30
exonic	gene_2849	fgenesh1_pm.24_#_51	scaffold_24	205047	205047	G	A	hom	30
exonic	gene_2849	fgenesh1_pm.24_#_51	scaffold_24	205053	205053	T	G	hom	30
exonic	gene_2849	fgenesh1_pm.24_#_51	scaffold_24	205055	205055	G	A	hom	30
exonic	gene_2849	fgenesh1_pm.24_#_51	scaffold_24	205060	205060	T	C	hom	30
exonic	gene_2849	fgenesh1_pm.24_#_51	scaffold_24	205061	205061	G	A	hom	30
exonic	gene_2849	fgenesh1_pm.24_#_51	scaffold_24	205075	205075	A	G	hom	30
exonic	gene_2849	fgenesh1_pm.24_#_51	scaffold_24	205079	205079	C	T	hom	30
exonic	gene_2849	fgenesh1_pm.24_#_51	scaffold_24	205095	205095	A	C	hom	30
exonic	gene_2849	fgenesh1_pm.24_#_51	scaffold_24	205110	205110	C	T	hom	30
exonic	gene_2849	fgenesh1_pm.24_#_51	scaffold_24	205111	205111	A	G	hom	30
exonic	gene_2849	fgenesh1_pm.24_#_51	scaffold_24	205112	205112	A	G	hom	30
exonic	gene_2849	fgenesh1_pm.24_#_51	scaffold_24	205122	205122	T	C	hom	30
exonic	gene_2849	fgenesh1_pm.24_#_51	scaffold_24	205136	205136	C	T	hom	30
exonic	gene_2849	fgenesh1_pm.24_#_51	scaffold_24	205140	205140	C	A	hom	30
exonic	gene_2849	fgenesh1_pm.24_#_51	scaffold_24	205141	205141	A	T	hom	30
exonic	gene_2849	fgenesh1_pm.24_#_51	scaffold_24	205156	205156	G	A	hom	30
exonic	gene_2849	fgenesh1_pm.24_#_51	scaffold_24	205162	205162	A	G	hom	30
exonic	gene_2849	fgenesh1_pm.24_#_51	scaffold_24	205172	205172	C	A	hom	30
exonic	gene_2849	fgenesh1_pm.24_#_51	scaffold_24	205195	205195	C	T	hom	30
exonic	gene_2849	fgenesh1_pm.24_#_51	scaffold_24	205196	205196	A	G	hom	30
exonic	gene_2849	fgenesh1_pm.24_#_51	scaffold_24	205201	205201	A	G	hom	30
exonic	gene_2849	fgenesh1_pm.24_#_51	scaffold_24	205206	205206	T	C	hom	30
exonic	gene_2849	fgenesh1_pm.24_#_51	scaffold_24	205207	205207	G	A	hom	30
exonic	gene_2849	fgenesh1_pm.24_#_51	scaffold_24	205220	205220	A	G	hom	30
exonic	gene_2849	fgenesh1_pm.24_#_51	scaffold_24	205223	205223	G	A	hom	30
exonic	gene_2849	fgenesh1_pm.24_#_51	scaffold_24	205224	205224	A	G	hom	30
exonic	gene_2849	fgenesh1_pm.24_#_51	scaffold_24	205228	205228	G	A	hom	30
exonic	gene_2849	fgenesh1_pm.24_#_51	scaffold_24	205232	205232	G	A	hom	30
exonic	gene_2849	fgenesh1_pm.24_#_51	scaffold_24	205235	205235	C	T	hom	30
downstream	gene_2849	fgenesh1_pm.24_#_51	scaffold_24	206013	206013	G	A	hom	30
upstream	gene_9862	estExt_Genewise1.C_2400011	scaffold_240	13070	13070	G	A	hom	30
upstream	gene_9866	estExt_Genemark1.C_2410003	scaffold_241	5835	5835	T	A	hom	30
upstream	gene_9866	estExt_Genemark1.C_2410003	scaffold_241	6221	6221	T	A	hom	30
intergenic	gene_9866(dist=1358),gene_9867(dist=1608)	estExt_Genemark1.C_2410003(dist=1358),fgenesh1_pg.241_#_4(dist=1608)	scaffold_241	6804	6804	A	T	hom	30
intergenic	gene_9866(dist=1364),gene_9867(dist=1602)	estExt_Genemark1.C_2410003(dist=1364),fgenesh1_pg.241_#_4(dist=1602)	scaffold_241	6810	6810	A	G	hom	30
downstream	gene_9870	estExt_Genewise1.C_2420006	scaffold_242	9406	9406	C	T	hom	30
intergenic	gene_9870(dist=1167),gene_9871(dist=1639)	estExt_Genewise1.C_2420006(dist=1167),fgenesh1_pg.242_#_4(dist=1639)	scaffold_242	9594	9594	A	G	hom	30
downstream	gene_9871	fgenesh1_pg.242_#_4	scaffold_242	10291	10291	G	A	hom	30
downstream	gene_9871	fgenesh1_pg.242_#_4	scaffold_242	10293	10293	G	A	hom	30
downstream	gene_9871	fgenesh1_pg.242_#_4	scaffold_242	10297	10297	T	C	hom	30
downstream	gene_9871	fgenesh1_pg.242_#_4	scaffold_242	10300	10300	C	T	hom	30
downstream	gene_9871	fgenesh1_pg.242_#_4	scaffold_242	10304	10304	T	A	hom	30
downstream	gene_9871	fgenesh1_pg.242_#_4	scaffold_242	10531	10531	G	A	hom	30
downstream	gene_9871	fgenesh1_pg.242_#_4	scaffold_242	10962	10962	G	A	hom	30
downstream	gene_9871	fgenesh1_pg.242_#_4	scaffold_242	10963	10963	A	G	hom	30
downstream	gene_9871	fgenesh1_pg.242_#_4	scaffold_242	11023	11023	A	G	hom	30
downstream	gene_9871	fgenesh1_pg.242_#_4	scaffold_242	11024	11024	G	A	hom	30
exonic	gene_9871	fgenesh1_pg.242_#_4	scaffold_242	11356	11356	A	G	hom	30
exonic	gene_9871	fgenesh1_pg.242_#_4	scaffold_242	11464	11464	C	T	hom	30
exonic	gene_9871	fgenesh1_pg.242_#_4	scaffold_242	11589	11589	C	T	hom	30
exonic	gene_9871	fgenesh1_pg.242_#_4	scaffold_242	11666	11666	G	A	hom	30
exonic	gene_9871	fgenesh1_pg.242_#_4	scaffold_242	11774	11774	C	T	hom	30
exonic	gene_9872	fgenesh1_pg.242_#_5	scaffold_242	12107	12107	A	G	hom	30
exonic	gene_9872	fgenesh1_pg.242_#_5	scaffold_242	12453	12453	C	T	hom	30
exonic	gene_9872	fgenesh1_pg.242_#_5	scaffold_242	12921	12921	A	G	hom	30
exonic	gene_9872	fgenesh1_pg.242_#_5	scaffold_242	12929	12929	C	T	hom	30
exonic	gene_9872	fgenesh1_pg.242_#_5	scaffold_242	12957	12957	C	T	hom	30
exonic	gene_9891	gm1.7973_g	scaffold_245	9549	9549	C	T	hom	30
exonic	gene_9896	fgenesh1_pm.247_#_1	scaffold_247	2888	2888	C	A	hom	30
upstream	gene_10016	e_gw1.248.1.1	scaffold_248	1665	1665	A	G	hom	30
upstream	gene_10016	e_gw1.248.1.1	scaffold_248	1713	1713	C	T	hom	30
downstream	gene_10016	e_gw1.248.1.1	scaffold_248	3241	3241	A	G	hom	30
downstream	gene_10016	e_gw1.248.1.1	scaffold_248	3255	3255	A	T	hom	30
downstream	gene_10016	e_gw1.248.1.1	scaffold_248	3256	3256	C	T	hom	30
downstream	gene_10016	e_gw1.248.1.1	scaffold_248	3261	3261	A	G	hom	30
downstream	gene_10016	e_gw1.248.1.1	scaffold_248	3285	3285	C	T	hom	30
downstream	gene_2860	gm1.2313_g	scaffold_25	29019	29019	G	A	hom	30
exonic	gene_2864	e_gw1.25.168.1	scaffold_25	37891	37891	G	A	hom	30
upstream	gene_2864	e_gw1.25.168.1	scaffold_25	40454	40454	C	G	hom	30
upstream;downstream	gene_2864;gene_2865	e_gw1.25.168.1;gm1.2318_g	scaffold_25	40461	40461	C	T	hom	30
upstream;downstream	gene_2864;gene_2865	e_gw1.25.168.1;gm1.2318_g	scaffold_25	40466	40466	C	T	hom	30
upstream;downstream	gene_2864;gene_2865	e_gw1.25.168.1;gm1.2318_g	scaffold_25	40470	40470	C	A	hom	30
upstream;downstream	gene_2864;gene_2865	e_gw1.25.168.1;gm1.2318_g	scaffold_25	40471	40471	A	T	hom	30
upstream;downstream	gene_2864;gene_2865	e_gw1.25.168.1;gm1.2318_g	scaffold_25	40490	40490	C	A	hom	30
upstream;downstream	gene_2864;gene_2865	e_gw1.25.168.1;gm1.2318_g	scaffold_25	40491	40491	C	A	hom	30
upstream;downstream	gene_2864;gene_2865	e_gw1.25.168.1;gm1.2318_g	scaffold_25	40492	40492	T	A	hom	30
upstream;downstream	gene_2864;gene_2865	e_gw1.25.168.1;gm1.2318_g	scaffold_25	40493	40493	G	A	hom	30
upstream;downstream	gene_2864;gene_2865	e_gw1.25.168.1;gm1.2318_g	scaffold_25	40494	40494	C	A	hom	30
upstream;downstream	gene_2864;gene_2865	e_gw1.25.168.1;gm1.2318_g	scaffold_25	40495	40495	T	A	hom	30
exonic	gene_2868	estExt_fgenesh1_pm.C_250011	scaffold_25	46714	46714	T	G	hom	30
exonic	gene_2869	fgenesh1_kg.25_#_22_#_Locus9970v1rpkm1.47	scaffold_25	50968	50968	G	A	hom	30
exonic	gene_2873	fgenesh1_kg.25_#_26_#_Locus2918v1rpkm37.54	scaffold_25	58513	58513	C	G	hom	30
exonic	gene_2873	fgenesh1_kg.25_#_26_#_Locus2918v1rpkm37.54	scaffold_25	59747	59747	G	A	hom	30
downstream	gene_2873,gene_2874	fgenesh1_kg.25_#_26_#_Locus2918v1rpkm37.54,gm1.2326_g	scaffold_25	60985	60985	A	G	hom	30
intronic	gene_2880	fgenesh1_kg.25_#_37_#_Locus4433v1rpkm17.73	scaffold_25	77951	77951	A	G	hom	30
exonic	gene_2884	e_gw1.25.140.1	scaffold_25	91631	91631	T	C	hom	30
exonic	gene_2910	e_gw1.25.55.1	scaffold_25	143865	143865	T	C	hom	30
exonic	gene_2916	e_gw1.25.144.1	scaffold_25	155319	155319	A	C	hom	30
exonic	gene_2923	estExt_Genewise1Plus.C_250142	scaffold_25	168783	168783	A	T	hom	30
exonic	gene_2924	CE186008_184,estExt_Genewise1Plus.C_250142	scaffold_25	169615	169615	A	T	hom	30
UTR3	gene_2935	fgenesh1_kg.25_#_93_#_Locus4265v1rpkm19.23	scaffold_25	191162	191162	C	A	hom	30
exonic	gene_9908	gm1.7986_g	scaffold_250	4102	4102	G	A	hom	30
exonic	gene_9913	estExt_Genewise1.C_2510002	scaffold_251	1187	1187	A	G	hom	30
exonic	gene_9920	gm1.7995_g	scaffold_252	8855	8855	C	T	hom	30
intergenic	NONE(dist=NONE),gene_9942(dist=1164)	NONE(dist=NONE),fgenesh1_kg.257_#_1_#_Locus160v1rpkm1151.37(dist=1164)	scaffold_257	917	917	C	G	hom	30
exonic	gene_9942	fgenesh1_kg.257_#_1_#_Locus160v1rpkm1151.37	scaffold_257	2492	2492	G	A	hom	30
exonic	gene_9942	fgenesh1_kg.257_#_1_#_Locus160v1rpkm1151.37	scaffold_257	2493	2493	G	T	hom	30
exonic	gene_9942	fgenesh1_kg.257_#_1_#_Locus160v1rpkm1151.37	scaffold_257	2866	2866	C	T	hom	30
exonic	gene_9942	fgenesh1_kg.257_#_1_#_Locus160v1rpkm1151.37	scaffold_257	2923	2923	A	G	hom	30
intergenic	NONE(dist=NONE),gene_9945(dist=3005)	NONE(dist=NONE),e_gw1.258.7.1(dist=3005)	scaffold_258	2209	2209	C	A	hom	30
upstream	gene_9945	e_gw1.258.7.1	scaffold_258	4561	4561	C	T	hom	30
upstream	gene_9945	e_gw1.258.7.1	scaffold_258	4674	4674	A	G	hom	30
upstream	gene_9945	e_gw1.258.7.1	scaffold_258	4679	4679	C	T	hom	30
upstream	gene_9945	e_gw1.258.7.1	scaffold_258	4680	4680	A	G	hom	30
upstream	gene_9945	e_gw1.258.7.1	scaffold_258	4709	4709	A	G	hom	30
intergenic	gene_9945(dist=2315),NONE(dist=NONE)	e_gw1.258.7.1(dist=2315),NONE(dist=NONE)	scaffold_258	8274	8274	C	T	hom	30
intergenic	gene_9945(dist=2974),NONE(dist=NONE)	e_gw1.258.7.1(dist=2974),NONE(dist=NONE)	scaffold_258	8933	8933	G	A	hom	30
intergenic	NONE(dist=NONE),gene_2946(dist=18841)	NONE(dist=NONE),fgenesh1_kg.26_#_1_#_Locus2006v1rpkm65.08(dist=18841)	scaffold_26	4664	4664	C	T	hom	30
intergenic	NONE(dist=NONE),gene_2946(dist=1621)	NONE(dist=NONE),fgenesh1_kg.26_#_1_#_Locus2006v1rpkm65.08(dist=1621)	scaffold_26	21884	21884	T	C	hom	30
exonic	gene_2952	estExt_Genewise1.C_260020	scaffold_26	37854	37854	G	T	hom	30
downstream	gene_2964,gene_2965	estExt_Genemark1.C_260019,fgenesh1_kg.26_#_26_#_Locus12300v1rpkm0.87	scaffold_26	72218	72218	G	C	hom	30
downstream	gene_2964,gene_2965	estExt_Genemark1.C_260019,fgenesh1_kg.26_#_26_#_Locus12300v1rpkm0.87	scaffold_26	72221	72221	G	C	hom	30
intronic	gene_2984	estExt_Genewise1Plus.C_260100	scaffold_26	130764	130764	A	T	hom	30
UTR3	gene_2984	estExt_Genewise1Plus.C_260100	scaffold_26	131554	131554	A	C	hom	30
upstream	gene_3008,gene_3009	fgenesh1_kg.26_#_78_#_Locus5823v2rpkm1.58,fgenesh1_kg.26_#_80_#_Locus5823v3rpkm0.77_PRE	scaffold_26	188513	188513	C	A	hom	30
intergenic	NONE(dist=NONE),NONE(dist=NONE)	NONE(dist=NONE),NONE(dist=NONE)	scaffold_262	7524	7524	A	C	hom	30
intergenic	NONE(dist=NONE),NONE(dist=NONE)	NONE(dist=NONE),NONE(dist=NONE)	scaffold_262	8229	8229	G	A	hom	30
UTR5	gene_9958	fgenesh1_kg.263_#_1_#_Locus3259v1rpkm31.51	scaffold_263	800	800	G	T	hom	30
exonic	gene_9958	fgenesh1_kg.263_#_1_#_Locus3259v1rpkm31.51	scaffold_263	2355	2355	T	C	hom	30
intergenic	NONE(dist=NONE),gene_9963(dist=1069)	NONE(dist=NONE),fgenesh1_kg.264_#_4_#_Locus5649v1rpkm8.92(dist=1069)	scaffold_264	44	44	T	C	hom	30
upstream	gene_9963	fgenesh1_kg.264_#_4_#_Locus5649v1rpkm8.92	scaffold_264	188	188	C	T	hom	30
upstream	gene_9963	fgenesh1_kg.264_#_4_#_Locus5649v1rpkm8.92	scaffold_264	189	189	A	G	hom	30
upstream	gene_9963	fgenesh1_kg.264_#_4_#_Locus5649v1rpkm8.92	scaffold_264	573	573	A	G	hom	30
upstream	gene_9963	fgenesh1_kg.264_#_4_#_Locus5649v1rpkm8.92	scaffold_264	632	632	A	G	hom	30
upstream	gene_9963	fgenesh1_kg.264_#_4_#_Locus5649v1rpkm8.92	scaffold_264	682	682	G	T	hom	30
upstream	gene_9963	fgenesh1_kg.264_#_4_#_Locus5649v1rpkm8.92	scaffold_264	735	735	A	G	hom	30
downstream	gene_9976	e_gw1.268.7.1	scaffold_268	2195	2195	C	T	hom	30
downstream	gene_9976	e_gw1.268.7.1	scaffold_268	2208	2208	A	G	hom	30
downstream	gene_9978	CE192874_160	scaffold_268	4012	4012	A	G	hom	30
downstream	gene_9978	CE192874_160	scaffold_268	4019	4019	A	G	hom	30
downstream	gene_9978	CE192874_160	scaffold_268	4034	4034	T	C	hom	30
downstream	gene_9981,gene_9982	estExt_Genemark1.C_2690001,fgenesh1_kg.269_#_2_#_Locus236v2rpkm8.98_PRE	scaffold_269	1236	1236	T	C	hom	30
intronic	gene_3025	MIX10404_2077_39	scaffold_27	25638	25638	G	T	hom	30
intronic	gene_3034	fgenesh1_pm.27_#_13	scaffold_27	47133	47133	A	T	hom	30
exonic	gene_3041	estExt_fgenesh1_pm.C_270017	scaffold_27	56390	56390	T	G	hom	30
UTR5	gene_3048	fgenesh1_kg.27_#_42_#_Locus3467v1rpkm28.42	scaffold_27	62848	62848	C	T	hom	30
downstream	gene_3063	estExt_fgenesh1_pg.C_270031	scaffold_27	95009	95009	G	C	hom	30
exonic	gene_3075	CE195237_10530	scaffold_27	119137	119137	G	A	hom	30
exonic	gene_3105	e_gw1.27.121.1	scaffold_27	183469	183469	T	G	hom	30
exonic	gene_3106	fgenesh1_kg.27_#_97_#_Locus6304v1rpkm6.31	scaffold_27	186288	186288	C	T	hom	30
exonic	gene_3106	fgenesh1_kg.27_#_97_#_Locus6304v1rpkm6.31	scaffold_27	187146	187146	T	C	hom	30
upstream	gene_3106	fgenesh1_kg.27_#_97_#_Locus6304v1rpkm6.31	scaffold_27	188854	188854	T	A	hom	30
upstream	gene_3106	fgenesh1_kg.27_#_97_#_Locus6304v1rpkm6.31	scaffold_27	188855	188855	T	C	hom	30
upstream	gene_3106	fgenesh1_kg.27_#_97_#_Locus6304v1rpkm6.31	scaffold_27	188858	188858	G	A	hom	30
upstream	gene_3106	fgenesh1_kg.27_#_97_#_Locus6304v1rpkm6.31	scaffold_27	188859	188859	T	A	hom	30
upstream	gene_3106	fgenesh1_kg.27_#_97_#_Locus6304v1rpkm6.31	scaffold_27	188860	188860	T	A	hom	30
upstream	gene_3106	fgenesh1_kg.27_#_97_#_Locus6304v1rpkm6.31	scaffold_27	188862	188862	T	A	hom	30
upstream	gene_3106	fgenesh1_kg.27_#_97_#_Locus6304v1rpkm6.31	scaffold_27	188871	188871	T	A	hom	30
upstream	gene_3106	fgenesh1_kg.27_#_97_#_Locus6304v1rpkm6.31	scaffold_27	188872	188872	C	A	hom	30
upstream	gene_3106	fgenesh1_kg.27_#_97_#_Locus6304v1rpkm6.31	scaffold_27	188874	188874	G	A	hom	30
upstream	gene_3106	fgenesh1_kg.27_#_97_#_Locus6304v1rpkm6.31	scaffold_27	188880	188880	T	A	hom	30
upstream	gene_3106	fgenesh1_kg.27_#_97_#_Locus6304v1rpkm6.31	scaffold_27	188881	188881	T	A	hom	30
upstream	gene_3106	fgenesh1_kg.27_#_97_#_Locus6304v1rpkm6.31	scaffold_27	188884	188884	T	A	hom	30
upstream	gene_3106	fgenesh1_kg.27_#_97_#_Locus6304v1rpkm6.31	scaffold_27	188885	188885	T	A	hom	30
upstream	gene_3106	fgenesh1_kg.27_#_97_#_Locus6304v1rpkm6.31	scaffold_27	188886	188886	T	A	hom	30
upstream	gene_3106	fgenesh1_kg.27_#_97_#_Locus6304v1rpkm6.31	scaffold_27	188887	188887	C	A	hom	30
exonic	gene_9987	fgenesh1_pm.270_#_1	scaffold_270	1877	1877	G	C	hom	30
upstream	gene_9993	estExt_Genemark1.C_2720001	scaffold_272	2261	2261	A	G	hom	30
upstream	gene_9993	estExt_Genemark1.C_2720001	scaffold_272	2474	2474	G	C	hom	30
upstream	gene_9993	estExt_Genemark1.C_2720001	scaffold_272	2475	2475	G	C	hom	30
intergenic	NONE(dist=NONE),NONE(dist=NONE)	NONE(dist=NONE),NONE(dist=NONE)	scaffold_273	1081	1081	C	T	hom	30
intergenic	NONE(dist=NONE),NONE(dist=NONE)	NONE(dist=NONE),NONE(dist=NONE)	scaffold_273	1084	1084	C	T	hom	30
intergenic	NONE(dist=NONE),NONE(dist=NONE)	NONE(dist=NONE),NONE(dist=NONE)	scaffold_273	1098	1098	C	T	hom	30
intergenic	NONE(dist=NONE),NONE(dist=NONE)	NONE(dist=NONE),NONE(dist=NONE)	scaffold_273	1135	1135	C	T	hom	30
intergenic	NONE(dist=NONE),NONE(dist=NONE)	NONE(dist=NONE),NONE(dist=NONE)	scaffold_273	1137	1137	C	G	hom	30
intergenic	NONE(dist=NONE),NONE(dist=NONE)	NONE(dist=NONE),NONE(dist=NONE)	scaffold_273	1156	1156	A	G	hom	30
intergenic	NONE(dist=NONE),NONE(dist=NONE)	NONE(dist=NONE),NONE(dist=NONE)	scaffold_273	1273	1273	A	G	hom	30
intergenic	NONE(dist=NONE),NONE(dist=NONE)	NONE(dist=NONE),NONE(dist=NONE)	scaffold_273	1321	1321	A	G	hom	30
intergenic	NONE(dist=NONE),NONE(dist=NONE)	NONE(dist=NONE),NONE(dist=NONE)	scaffold_273	1459	1459	A	G	hom	30
intergenic	NONE(dist=NONE),NONE(dist=NONE)	NONE(dist=NONE),NONE(dist=NONE)	scaffold_273	1666	1666	A	G	hom	30
intergenic	NONE(dist=NONE),NONE(dist=NONE)	NONE(dist=NONE),NONE(dist=NONE)	scaffold_273	1793	1793	A	G	hom	30
intergenic	NONE(dist=NONE),NONE(dist=NONE)	NONE(dist=NONE),NONE(dist=NONE)	scaffold_273	1918	1918	A	G	hom	30
intergenic	NONE(dist=NONE),NONE(dist=NONE)	NONE(dist=NONE),NONE(dist=NONE)	scaffold_273	1920	1920	A	G	hom	30
intergenic	NONE(dist=NONE),NONE(dist=NONE)	NONE(dist=NONE),NONE(dist=NONE)	scaffold_273	1938	1938	A	G	hom	30
intergenic	NONE(dist=NONE),NONE(dist=NONE)	NONE(dist=NONE),NONE(dist=NONE)	scaffold_273	2022	2022	A	G	hom	30
intergenic	NONE(dist=NONE),NONE(dist=NONE)	NONE(dist=NONE),NONE(dist=NONE)	scaffold_273	2049	2049	A	G	hom	30
intergenic	NONE(dist=NONE),NONE(dist=NONE)	NONE(dist=NONE),NONE(dist=NONE)	scaffold_273	2104	2104	C	T	hom	30
intergenic	NONE(dist=NONE),NONE(dist=NONE)	NONE(dist=NONE),NONE(dist=NONE)	scaffold_273	2163	2163	A	G	hom	30
intergenic	NONE(dist=NONE),NONE(dist=NONE)	NONE(dist=NONE),NONE(dist=NONE)	scaffold_273	2280	2280	A	G	hom	30
intergenic	NONE(dist=NONE),NONE(dist=NONE)	NONE(dist=NONE),NONE(dist=NONE)	scaffold_273	2711	2711	G	T	hom	30
intergenic	NONE(dist=NONE),NONE(dist=NONE)	NONE(dist=NONE),NONE(dist=NONE)	scaffold_273	2726	2726	A	G	hom	30
intergenic	NONE(dist=NONE),NONE(dist=NONE)	NONE(dist=NONE),NONE(dist=NONE)	scaffold_273	2770	2770	T	C	hom	30
intergenic	NONE(dist=NONE),NONE(dist=NONE)	NONE(dist=NONE),NONE(dist=NONE)	scaffold_273	2776	2776	T	C	hom	30
intergenic	NONE(dist=NONE),NONE(dist=NONE)	NONE(dist=NONE),NONE(dist=NONE)	scaffold_273	2781	2781	A	G	hom	30
intergenic	NONE(dist=NONE),NONE(dist=NONE)	NONE(dist=NONE),NONE(dist=NONE)	scaffold_273	2784	2784	T	C	hom	30
intergenic	NONE(dist=NONE),NONE(dist=NONE)	NONE(dist=NONE),NONE(dist=NONE)	scaffold_273	2907	2907	T	C	hom	30
intergenic	NONE(dist=NONE),NONE(dist=NONE)	NONE(dist=NONE),NONE(dist=NONE)	scaffold_273	3372	3372	A	G	hom	30
intergenic	NONE(dist=NONE),NONE(dist=NONE)	NONE(dist=NONE),NONE(dist=NONE)	scaffold_273	3382	3382	A	G	hom	30
intergenic	NONE(dist=NONE),NONE(dist=NONE)	NONE(dist=NONE),NONE(dist=NONE)	scaffold_273	3386	3386	A	G	hom	30
intergenic	NONE(dist=NONE),NONE(dist=NONE)	NONE(dist=NONE),NONE(dist=NONE)	scaffold_273	3505	3505	A	G	hom	30
intergenic	NONE(dist=NONE),NONE(dist=NONE)	NONE(dist=NONE),NONE(dist=NONE)	scaffold_273	3550	3550	A	G	hom	30
intergenic	NONE(dist=NONE),NONE(dist=NONE)	NONE(dist=NONE),NONE(dist=NONE)	scaffold_273	3580	3580	C	G	hom	30
intergenic	NONE(dist=NONE),NONE(dist=NONE)	NONE(dist=NONE),NONE(dist=NONE)	scaffold_273	3622	3622	A	G	hom	30
intergenic	NONE(dist=NONE),NONE(dist=NONE)	NONE(dist=NONE),NONE(dist=NONE)	scaffold_273	3670	3670	A	G	hom	30
intergenic	NONE(dist=NONE),NONE(dist=NONE)	NONE(dist=NONE),NONE(dist=NONE)	scaffold_273	3691	3691	A	G	hom	30
intergenic	NONE(dist=NONE),NONE(dist=NONE)	NONE(dist=NONE),NONE(dist=NONE)	scaffold_273	3696	3696	A	G	hom	30
intergenic	NONE(dist=NONE),NONE(dist=NONE)	NONE(dist=NONE),NONE(dist=NONE)	scaffold_273	3725	3725	A	G	hom	30
intergenic	NONE(dist=NONE),NONE(dist=NONE)	NONE(dist=NONE),NONE(dist=NONE)	scaffold_273	3734	3734	A	G	hom	30
intergenic	NONE(dist=NONE),NONE(dist=NONE)	NONE(dist=NONE),NONE(dist=NONE)	scaffold_273	3752	3752	A	G	hom	30
intergenic	NONE(dist=NONE),NONE(dist=NONE)	NONE(dist=NONE),NONE(dist=NONE)	scaffold_273	3759	3759	A	G	hom	30
intergenic	NONE(dist=NONE),NONE(dist=NONE)	NONE(dist=NONE),NONE(dist=NONE)	scaffold_273	3826	3826	A	G	hom	30
intergenic	NONE(dist=NONE),NONE(dist=NONE)	NONE(dist=NONE),NONE(dist=NONE)	scaffold_273	3857	3857	A	G	hom	30
intergenic	NONE(dist=NONE),NONE(dist=NONE)	NONE(dist=NONE),NONE(dist=NONE)	scaffold_273	3920	3920	A	G	hom	30
intergenic	NONE(dist=NONE),NONE(dist=NONE)	NONE(dist=NONE),NONE(dist=NONE)	scaffold_273	3943	3943	A	G	hom	30
intergenic	NONE(dist=NONE),NONE(dist=NONE)	NONE(dist=NONE),NONE(dist=NONE)	scaffold_273	4032	4032	A	G	hom	30
intergenic	NONE(dist=NONE),NONE(dist=NONE)	NONE(dist=NONE),NONE(dist=NONE)	scaffold_273	4108	4108	T	C	hom	30
intergenic	NONE(dist=NONE),NONE(dist=NONE)	NONE(dist=NONE),NONE(dist=NONE)	scaffold_273	4109	4109	A	G	hom	30
intergenic	NONE(dist=NONE),NONE(dist=NONE)	NONE(dist=NONE),NONE(dist=NONE)	scaffold_273	4115	4115	A	G	hom	30
intergenic	NONE(dist=NONE),NONE(dist=NONE)	NONE(dist=NONE),NONE(dist=NONE)	scaffold_273	4133	4133	T	C	hom	30
intergenic	NONE(dist=NONE),NONE(dist=NONE)	NONE(dist=NONE),NONE(dist=NONE)	scaffold_273	4140	4140	T	C	hom	30
intergenic	NONE(dist=NONE),NONE(dist=NONE)	NONE(dist=NONE),NONE(dist=NONE)	scaffold_273	4750	4750	T	C	hom	30
intergenic	NONE(dist=NONE),NONE(dist=NONE)	NONE(dist=NONE),NONE(dist=NONE)	scaffold_273	4759	4759	A	G	hom	30
intergenic	NONE(dist=NONE),NONE(dist=NONE)	NONE(dist=NONE),NONE(dist=NONE)	scaffold_273	4767	4767	A	G	hom	30
intergenic	NONE(dist=NONE),NONE(dist=NONE)	NONE(dist=NONE),NONE(dist=NONE)	scaffold_273	4771	4771	T	C	hom	30
intergenic	NONE(dist=NONE),NONE(dist=NONE)	NONE(dist=NONE),NONE(dist=NONE)	scaffold_273	4772	4772	A	G	hom	30
intergenic	NONE(dist=NONE),NONE(dist=NONE)	NONE(dist=NONE),NONE(dist=NONE)	scaffold_273	4790	4790	A	G	hom	30
intergenic	NONE(dist=NONE),NONE(dist=NONE)	NONE(dist=NONE),NONE(dist=NONE)	scaffold_273	4801	4801	A	G	hom	30
downstream	gene_9994	fgenesh1_kg.274_#_1_#_Locus4420v2rpkm10.04	scaffold_274	1183	1183	G	A	hom	30
exonic	gene_9994	fgenesh1_kg.274_#_1_#_Locus4420v2rpkm10.04	scaffold_274	2457	2457	A	G	hom	30
exonic	gene_9994	fgenesh1_kg.274_#_1_#_Locus4420v2rpkm10.04	scaffold_274	3965	3965	T	C	hom	30
exonic	gene_9994	fgenesh1_kg.274_#_1_#_Locus4420v2rpkm10.04	scaffold_274	3966	3966	G	A	hom	30
exonic	gene_9994	fgenesh1_kg.274_#_1_#_Locus4420v2rpkm10.04	scaffold_274	4386	4386	G	A	hom	30
exonic	gene_9994	fgenesh1_kg.274_#_1_#_Locus4420v2rpkm10.04	scaffold_274	4499	4499	C	T	hom	30
upstream	gene_9994	fgenesh1_kg.274_#_1_#_Locus4420v2rpkm10.04	scaffold_274	5769	5769	C	G	hom	30
upstream	gene_9994	fgenesh1_kg.274_#_1_#_Locus4420v2rpkm10.04	scaffold_274	5778	5778	A	G	hom	30
upstream	gene_9995	estExt_fgenesh1_pg.C_2750001	scaffold_275	180	180	G	A	hom	30
exonic	gene_9996	e_gw1.275.2.1	scaffold_275	4674	4674	G	A	hom	30
intergenic	NONE(dist=NONE),gene_9997(dist=2293)	NONE(dist=NONE),fgenesh1_pm.276_#_1(dist=2293)	scaffold_276	411	411	A	G	hom	30
intergenic	NONE(dist=NONE),gene_9997(dist=2275)	NONE(dist=NONE),fgenesh1_pm.276_#_1(dist=2275)	scaffold_276	429	429	A	G	hom	30
intergenic	NONE(dist=NONE),gene_9997(dist=2217)	NONE(dist=NONE),fgenesh1_pm.276_#_1(dist=2217)	scaffold_276	487	487	A	G	hom	30
intergenic	NONE(dist=NONE),gene_9997(dist=2092)	NONE(dist=NONE),fgenesh1_pm.276_#_1(dist=2092)	scaffold_276	612	612	A	C	hom	30
intergenic	NONE(dist=NONE),gene_9997(dist=1413)	NONE(dist=NONE),fgenesh1_pm.276_#_1(dist=1413)	scaffold_276	1291	1291	T	C	hom	30
intergenic	NONE(dist=NONE),gene_9997(dist=1205)	NONE(dist=NONE),fgenesh1_pm.276_#_1(dist=1205)	scaffold_276	1499	1499	A	G	hom	30
intergenic	NONE(dist=NONE),gene_9997(dist=1001)	NONE(dist=NONE),fgenesh1_pm.276_#_1(dist=1001)	scaffold_276	1703	1703	A	G	hom	30
downstream	gene_9997	fgenesh1_pm.276_#_1	scaffold_276	4856	4856	C	T	hom	30
downstream	gene_9997	fgenesh1_pm.276_#_1	scaffold_276	4859	4859	C	T	hom	30
downstream	gene_9997	fgenesh1_pm.276_#_1	scaffold_276	4871	4871	G	T	hom	30
intergenic	gene_9997(dist=1720),NONE(dist=NONE)	fgenesh1_pm.276_#_1(dist=1720),NONE(dist=NONE)	scaffold_276	5643	5643	C	T	hom	30
exonic	gene_10001	gm1.8064_g	scaffold_278	692	692	C	T	hom	30
intergenic	gene_10001(dist=2609),NONE(dist=NONE)	gm1.8064_g(dist=2609),NONE(dist=NONE)	scaffold_278	3317	3317	C	T	hom	30
intergenic	gene_10001(dist=2629),NONE(dist=NONE)	gm1.8064_g(dist=2629),NONE(dist=NONE)	scaffold_278	3337	3337	G	A	hom	30
intergenic	gene_10001(dist=2648),NONE(dist=NONE)	gm1.8064_g(dist=2648),NONE(dist=NONE)	scaffold_278	3356	3356	C	T	hom	30
intergenic	gene_10001(dist=2684),NONE(dist=NONE)	gm1.8064_g(dist=2684),NONE(dist=NONE)	scaffold_278	3392	3392	T	C	hom	30
intergenic	gene_10001(dist=2722),NONE(dist=NONE)	gm1.8064_g(dist=2722),NONE(dist=NONE)	scaffold_278	3430	3430	C	T	hom	30
intergenic	gene_10001(dist=2725),NONE(dist=NONE)	gm1.8064_g(dist=2725),NONE(dist=NONE)	scaffold_278	3433	3433	C	T	hom	30
intergenic	gene_10001(dist=2729),NONE(dist=NONE)	gm1.8064_g(dist=2729),NONE(dist=NONE)	scaffold_278	3437	3437	C	T	hom	30
intergenic	gene_10001(dist=2785),NONE(dist=NONE)	gm1.8064_g(dist=2785),NONE(dist=NONE)	scaffold_278	3493	3493	C	T	hom	30
intergenic	NONE(dist=NONE),gene_3107(dist=1823)	NONE(dist=NONE),fgenesh1_kg.28_#_3_#_Locus7778v1rpkm2.95(dist=1823)	scaffold_28	843	843	A	C	hom	30
intergenic	NONE(dist=NONE),gene_3107(dist=1672)	NONE(dist=NONE),fgenesh1_kg.28_#_3_#_Locus7778v1rpkm2.95(dist=1672)	scaffold_28	994	994	A	T	hom	30
intergenic	NONE(dist=NONE),gene_3107(dist=1627)	NONE(dist=NONE),fgenesh1_kg.28_#_3_#_Locus7778v1rpkm2.95(dist=1627)	scaffold_28	1039	1039	G	A	hom	30
intergenic	NONE(dist=NONE),gene_3107(dist=1624)	NONE(dist=NONE),fgenesh1_kg.28_#_3_#_Locus7778v1rpkm2.95(dist=1624)	scaffold_28	1042	1042	G	A	hom	30
intergenic	NONE(dist=NONE),gene_3107(dist=1623)	NONE(dist=NONE),fgenesh1_kg.28_#_3_#_Locus7778v1rpkm2.95(dist=1623)	scaffold_28	1043	1043	C	T	hom	30
intergenic	NONE(dist=NONE),gene_3107(dist=1500)	NONE(dist=NONE),fgenesh1_kg.28_#_3_#_Locus7778v1rpkm2.95(dist=1500)	scaffold_28	1166	1166	G	A	hom	30
upstream	gene_3107	fgenesh1_kg.28_#_3_#_Locus7778v1rpkm2.95	scaffold_28	2095	2095	G	A	hom	30
upstream	gene_3107	fgenesh1_kg.28_#_3_#_Locus7778v1rpkm2.95	scaffold_28	2111	2111	T	C	hom	30
upstream	gene_3107	fgenesh1_kg.28_#_3_#_Locus7778v1rpkm2.95	scaffold_28	2115	2115	C	T	hom	30
upstream	gene_3107	fgenesh1_kg.28_#_3_#_Locus7778v1rpkm2.95	scaffold_28	2119	2119	C	T	hom	30
exonic	gene_3113	fgenesh1_kg.28_#_9_#_Locus6729v2rpkm0.86	scaffold_28	12969	12969	T	C	hom	30
exonic	gene_3116	CE197642_130	scaffold_28	19557	19557	T	C	hom	30
downstream	gene_3118	e_gw1.28.62.1	scaffold_28	23193	23193	G	A	hom	30
exonic	gene_3122	estExt_Genewise1.C_280023	scaffold_28	30955	30955	A	G	hom	30
exonic	gene_3134	fgenesh1_kg.28_#_35_#_Locus5182v1rpkm11.46	scaffold_28	53303	53303	T	C	hom	30
exonic	gene_3144	estExt_Genewise1Plus.C_280065	scaffold_28	86870	86870	G	A	hom	30
intronic	gene_3149	gm1.2550_g	scaffold_28	99846	99846	C	T	hom	30
exonic	gene_3153	gm1.2554_g	scaffold_28	108605	108605	A	G	hom	30
exonic	gene_3158	fgenesh1_kg.28_#_59_#_Locus8799v2rpkm0.73	scaffold_28	116494	116494	T	C	hom	30
downstream	gene_3160	e_gw1.28.56.1	scaffold_28	118868	118868	A	G	hom	30
exonic	gene_10009	gm1.8073_g	scaffold_284	1471	1471	C	G	hom	30
exonic	gene_10009	gm1.8073_g	scaffold_284	1482	1482	C	A	hom	30
exonic	gene_10009	gm1.8073_g	scaffold_284	1485	1485	A	G	hom	30
exonic	gene_10009	gm1.8073_g	scaffold_284	1493	1493	C	G	hom	30
exonic	gene_10009	gm1.8073_g	scaffold_284	1496	1496	C	A	hom	30
intronic	gene_10009	gm1.8073_g	scaffold_284	1511	1511	A	G	hom	30
intronic	gene_10009	gm1.8073_g	scaffold_284	1514	1514	A	C	hom	30
intronic	gene_10009	gm1.8073_g	scaffold_284	1515	1515	T	A	hom	30
intronic	gene_10009	gm1.8073_g	scaffold_284	1516	1516	G	A	hom	30
intronic	gene_10009	gm1.8073_g	scaffold_284	1518	1518	A	C	hom	30
intronic	gene_10009	gm1.8073_g	scaffold_284	1522	1522	G	A	hom	30
intronic	gene_10009	gm1.8073_g	scaffold_284	1525	1525	G	C	hom	30
intronic	gene_10009	gm1.8073_g	scaffold_284	1526	1526	C	T	hom	30
intronic	gene_10009	gm1.8073_g	scaffold_284	1527	1527	A	C	hom	30
intronic	gene_10009	gm1.8073_g	scaffold_284	1530	1530	A	C	hom	30
intronic	gene_10009	gm1.8073_g	scaffold_284	1532	1532	G	A	hom	30
intronic	gene_10009	gm1.8073_g	scaffold_284	1535	1535	C	T	hom	30
intronic	gene_10009	gm1.8073_g	scaffold_284	1541	1541	A	G	hom	30
intronic	gene_10009	gm1.8073_g	scaffold_284	1545	1545	A	C	hom	30
intronic	gene_10009	gm1.8073_g	scaffold_284	1547	1547	T	C	hom	30
exonic	gene_10009	gm1.8073_g	scaffold_284	1558	1558	G	A	hom	30
exonic	gene_10009	gm1.8073_g	scaffold_284	1575	1575	T	A	hom	30
exonic	gene_10009	gm1.8073_g	scaffold_284	1587	1587	G	A	hom	30
downstream	gene_10011	fgenesh1_kg.286_#_1_#_Locus7302v1rpkm3.64	scaffold_286	21	21	G	A	hom	30
intergenic	NONE(dist=NONE),NONE(dist=NONE)	NONE(dist=NONE),NONE(dist=NONE)	scaffold_287	51	51	C	T	hom	30
intronic	gene_3194	gm1.2586_g	scaffold_29	2006	2006	G	A	hom	30
exonic	gene_3196	e_gw1.29.64.1	scaffold_29	4738	4738	G	A	hom	30
upstream	gene_3199,gene_3200	e_gw1.29.122.1,gm1.2592_g	scaffold_29	12417	12417	T	C	hom	30
exonic	gene_3201	gw1.29.77.1	scaffold_29	13996	13996	G	A	hom	30
exonic	gene_3203	estExt_Genewise1Plus.C_290016	scaffold_29	28588	28588	G	A	hom	30
exonic	gene_3209	fgenesh1_kg.29_#_2_#_Locus7062v1rpkm4.11	scaffold_29	41478	41478	G	T	hom	30
exonic	gene_3209	fgenesh1_kg.29_#_2_#_Locus7062v1rpkm4.11	scaffold_29	41502	41502	G	A	hom	30
downstream	gene_3214	fgenesh1_kg.29_#_12_#_Locus5392v1rpkm10.24	scaffold_29	53809	53809	A	T	hom	30
intronic	gene_3219	fgenesh1_pm.29_#_12	scaffold_29	66476	66476	T	A	hom	30
exonic	gene_3222	gm1.2610_g	scaffold_29	73111	73111	T	C	hom	30
intergenic	gene_3230(dist=1102),gene_3231(dist=3056)	gm1.2617_g(dist=1102),CE201554_1850(dist=3056)	scaffold_29	104134	104134	A	T	hom	30
intergenic	gene_3233(dist=1116),gene_3237(dist=1083)	gm1.2620_g(dist=1116),fgenesh1_kg.29_#_29_#_Locus6575v1rpkm5.35(dist=1083)	scaffold_29	117195	117195	T	C	hom	30
downstream	gene_3236,gene_3237	fgenesh1_kg.29_#_29_#_Locus6575v1rpkm5.35,fgenesh1_kg.29_#_30_#_Locus6575v3rpkm1.04	scaffold_29	118249	118249	C	T	hom	30
downstream	gene_3239,gene_3240	CE201636_1916,e_gw1.29.36.1	scaffold_29	124455	124455	C	G	hom	30
exonic	gene_3246	fgenesh1_kg.29_#_41_#_Locus1369v1rpkm107.40	scaffold_29	141575	141575	G	A	hom	30
downstream	gene_3247	estExt_fgenesh1_pm.C_290025	scaffold_29	147810	147810	A	G	hom	30
intronic	gene_3251	estExt_fgenesh1_pm.C_290028	scaffold_29	156469	156469	T	C	hom	30
exonic	gene_3251	estExt_fgenesh1_pm.C_290028	scaffold_29	160409	160409	G	A	hom	30
exonic	gene_332	e_gw1.3.45.1	scaffold_3	3161	3161	G	T	hom	30
exonic	gene_332	e_gw1.3.45.1	scaffold_3	3234	3234	T	C	hom	30
upstream;downstream	gene_336;gene_337	estExt_Genewise1.C_30008;e_gw1.3.22.1	scaffold_3	15823	15823	A	T	hom	30
exonic	gene_362	estExt_Genewise1.C_30050	scaffold_3	77626	77626	G	A	hom	30
UTR5	gene_378	fgenesh1_kg.3_#_46_#_Locus1089v1rpkm141.98	scaffold_3	111341	111341	A	C	hom	30
UTR5	gene_378	fgenesh1_kg.3_#_46_#_Locus1089v1rpkm141.98	scaffold_3	111342	111342	G	C	hom	30
intergenic	gene_378(dist=4903),gene_379(dist=35856)	fgenesh1_kg.3_#_46_#_Locus1089v1rpkm141.98(dist=4903),e_gw1.3.62.1(dist=35856)	scaffold_3	116278	116278	T	G	hom	30
intergenic	gene_378(dist=11235),gene_379(dist=29524)	fgenesh1_kg.3_#_46_#_Locus1089v1rpkm141.98(dist=11235),e_gw1.3.62.1(dist=29524)	scaffold_3	122610	122610	A	G	hom	30
intergenic	gene_378(dist=17535),gene_379(dist=23224)	fgenesh1_kg.3_#_46_#_Locus1089v1rpkm141.98(dist=17535),e_gw1.3.62.1(dist=23224)	scaffold_3	128910	128910	A	T	hom	30
exonic	gene_409	MIX10990_27_70	scaffold_3	205420	205420	G	A	hom	30
intronic	gene_417	estExt_fgenesh1_pm.C_30051	scaffold_3	223722	223722	T	C	hom	30
exonic	gene_423	estExt_Genewise1Plus.C_30150	scaffold_3	230797	230797	C	T	hom	30
exonic	gene_428	gm1.337_g	scaffold_3	241318	241318	A	G	hom	30
exonic	gene_428	gm1.337_g	scaffold_3	243545	243545	G	A	hom	30
upstream;downstream	gene_452;gene_453	estExt_Genewise1.C_30190;fgenesh1_kg.3_#_115_#_Locus8275v1rpkm2.45	scaffold_3	289397	289397	G	T	hom	30
exonic	gene_466	gm1.368_g	scaffold_3	323813	323813	T	C	hom	30
upstream;downstream	gene_467;gene_469	e_gw1.3.196.1;fgenesh1_kg.3_#_140_#_Locus2916v1rpkm37.60	scaffold_3	326648	326648	T	A	hom	30
upstream;downstream	gene_467;gene_469	e_gw1.3.196.1;fgenesh1_kg.3_#_140_#_Locus2916v1rpkm37.60	scaffold_3	326649	326649	C	A	hom	30
upstream;downstream	gene_467;gene_469	e_gw1.3.196.1;fgenesh1_kg.3_#_140_#_Locus2916v1rpkm37.60	scaffold_3	326650	326650	G	A	hom	30
upstream;downstream	gene_467;gene_469	e_gw1.3.196.1;fgenesh1_kg.3_#_140_#_Locus2916v1rpkm37.60	scaffold_3	326652	326652	C	A	hom	30
upstream;downstream	gene_467;gene_469	e_gw1.3.196.1;fgenesh1_kg.3_#_140_#_Locus2916v1rpkm37.60	scaffold_3	326653	326653	G	A	hom	30
upstream;downstream	gene_467;gene_469	e_gw1.3.196.1;fgenesh1_kg.3_#_140_#_Locus2916v1rpkm37.60	scaffold_3	326654	326654	C	A	hom	30
upstream;downstream	gene_467;gene_469	e_gw1.3.196.1;fgenesh1_kg.3_#_140_#_Locus2916v1rpkm37.60	scaffold_3	326655	326655	C	A	hom	30
downstream	gene_485	fgenesh1_kg.3_#_158_#_Locus4652v1rpkm15.48	scaffold_3	358526	358526	A	G	hom	30
downstream	gene_485	fgenesh1_kg.3_#_158_#_Locus4652v1rpkm15.48	scaffold_3	358527	358527	C	T	hom	30
downstream	gene_485	fgenesh1_kg.3_#_158_#_Locus4652v1rpkm15.48	scaffold_3	358648	358648	C	T	hom	30
upstream	gene_485	fgenesh1_kg.3_#_158_#_Locus4652v1rpkm15.48	scaffold_3	361066	361066	G	A	hom	30
intronic	gene_3264	gm1.2645_g	scaffold_30	4877	4877	A	G	hom	30
intronic	gene_3271	e_gw1.30.63.1	scaffold_30	21296	21296	T	C	hom	30
exonic	gene_3280	gm1.2660_g	scaffold_30	45398	45398	A	G	hom	30
exonic	gene_3289	fgenesh1_kg.30_#_20_#_Locus4469v1rpkm17.30	scaffold_30	69454	69454	C	T	hom	30
UTR3	gene_3310	fgenesh1_kg.30_#_37_#_Locus7219v2rpkm0.65	scaffold_30	120967	120967	T	C	hom	30
exonic	gene_3315	fgenesh1_kg.30_#_45_#_Locus2311v1rpkm52.67	scaffold_30	129673	129673	C	T	hom	30
upstream	gene_3321,gene_3322	fgenesh1_kg.30_#_50_#_Locus14284v1rpkm0.51,fgenesh1_kg.30_#_51_#_Locus1875v1rpkm71.04	scaffold_30	145713	145713	G	C	hom	30
upstream;downstream	gene_3333;gene_3331	fgenesh1_kg.30_#_64_#_Locus3252v1rpkm31.61;e_gw1.30.21.1	scaffold_30	171277	171277	C	T	hom	30
exonic	gene_3333	fgenesh1_kg.30_#_64_#_Locus3252v1rpkm31.61	scaffold_30	176777	176777	C	A	hom	30
exonic	gene_3340	estExt_Genewise1Plus.C_310008	scaffold_31	12637	12637	A	G	hom	30
exonic	gene_3340	estExt_Genewise1Plus.C_310008	scaffold_31	12638	12638	T	G	hom	30
exonic	gene_3351	fgenesh1_pg.31_#_16	scaffold_31	41601	41601	C	A	hom	30
upstream;downstream	gene_3376;gene_3375	fgenesh1_kg.31_#_48_#_Locus10316v1rpkm1.36;gw1.31.185.1	scaffold_31	88447	88447	G	A	hom	30
exonic	gene_3396	fgenesh1_kg.31_#_68_#_Locus14647v1rpkm0.46	scaffold_31	123153	123153	G	A	hom	30
UTR5	gene_3403	fgenesh1_kg.31_#_76_#_Locus4386v1rpkm18.11	scaffold_31	142044	142044	C	G	hom	30
UTR3	gene_3434	fgenesh1_kg.32_#_21_#_Locus3755v1rpkm24.63	scaffold_32	39633	39633	C	G	hom	30
intergenic	gene_3439(dist=1131),gene_3440(dist=2276)	fgenesh1_pg.32_#_17(dist=1131),estExt_Genewise1Plus.C_320042(dist=2276)	scaffold_32	57711	57711	G	C	hom	30
intergenic	gene_3439(dist=1132),gene_3440(dist=2275)	fgenesh1_pg.32_#_17(dist=1132),estExt_Genewise1Plus.C_320042(dist=2275)	scaffold_32	57712	57712	G	T	hom	30
intergenic	gene_3439(dist=1135),gene_3440(dist=2272)	fgenesh1_pg.32_#_17(dist=1135),estExt_Genewise1Plus.C_320042(dist=2272)	scaffold_32	57715	57715	G	T	hom	30
intergenic	gene_3439(dist=1136),gene_3440(dist=2271)	fgenesh1_pg.32_#_17(dist=1136),estExt_Genewise1Plus.C_320042(dist=2271)	scaffold_32	57716	57716	A	G	hom	30
intergenic	gene_3439(dist=1137),gene_3440(dist=2270)	fgenesh1_pg.32_#_17(dist=1137),estExt_Genewise1Plus.C_320042(dist=2270)	scaffold_32	57717	57717	A	T	hom	30
intergenic	gene_3439(dist=1140),gene_3440(dist=2267)	fgenesh1_pg.32_#_17(dist=1140),estExt_Genewise1Plus.C_320042(dist=2267)	scaffold_32	57720	57720	G	T	hom	30
intergenic	gene_3439(dist=1209),gene_3440(dist=2198)	fgenesh1_pg.32_#_17(dist=1209),estExt_Genewise1Plus.C_320042(dist=2198)	scaffold_32	57789	57789	C	T	hom	30
intergenic	gene_3439(dist=1218),gene_3440(dist=2189)	fgenesh1_pg.32_#_17(dist=1218),estExt_Genewise1Plus.C_320042(dist=2189)	scaffold_32	57798	57798	C	T	hom	30
intergenic	gene_3439(dist=1224),gene_3440(dist=2183)	fgenesh1_pg.32_#_17(dist=1224),estExt_Genewise1Plus.C_320042(dist=2183)	scaffold_32	57804	57804	C	T	hom	30
intergenic	gene_3439(dist=1228),gene_3440(dist=2179)	fgenesh1_pg.32_#_17(dist=1228),estExt_Genewise1Plus.C_320042(dist=2179)	scaffold_32	57808	57808	C	T	hom	30
intergenic	gene_3439(dist=1269),gene_3440(dist=2138)	fgenesh1_pg.32_#_17(dist=1269),estExt_Genewise1Plus.C_320042(dist=2138)	scaffold_32	57849	57849	A	G	hom	30
intergenic	gene_3439(dist=1317),gene_3440(dist=2090)	fgenesh1_pg.32_#_17(dist=1317),estExt_Genewise1Plus.C_320042(dist=2090)	scaffold_32	57897	57897	C	T	hom	30
intergenic	gene_3439(dist=1347),gene_3440(dist=2060)	fgenesh1_pg.32_#_17(dist=1347),estExt_Genewise1Plus.C_320042(dist=2060)	scaffold_32	57927	57927	A	G	hom	30
intergenic	gene_3439(dist=1402),gene_3440(dist=2005)	fgenesh1_pg.32_#_17(dist=1402),estExt_Genewise1Plus.C_320042(dist=2005)	scaffold_32	57982	57982	T	C	hom	30
intergenic	gene_3439(dist=1972),gene_3440(dist=1435)	fgenesh1_pg.32_#_17(dist=1972),estExt_Genewise1Plus.C_320042(dist=1435)	scaffold_32	58552	58552	A	G	hom	30
upstream	gene_3443	e_gw1.32.147.1	scaffold_32	71200	71200	G	A	hom	30
upstream;downstream	gene_3456;gene_3457	estExt_Genemark1.C_320029;fgenesh1_kg.32_#_53_#_Locus3433v1rpkm28.90	scaffold_32	101467	101467	G	T	hom	30
upstream;downstream	gene_3456;gene_3457	estExt_Genemark1.C_320029;fgenesh1_kg.32_#_53_#_Locus3433v1rpkm28.90	scaffold_32	101468	101468	A	T	hom	30
upstream;downstream	gene_3456;gene_3457	estExt_Genemark1.C_320029;fgenesh1_kg.32_#_53_#_Locus3433v1rpkm28.90	scaffold_32	101469	101469	G	T	hom	30
upstream;downstream	gene_3456;gene_3457	estExt_Genemark1.C_320029;fgenesh1_kg.32_#_53_#_Locus3433v1rpkm28.90	scaffold_32	101471	101471	C	T	hom	30
upstream;downstream	gene_3456;gene_3457	estExt_Genemark1.C_320029;fgenesh1_kg.32_#_53_#_Locus3433v1rpkm28.90	scaffold_32	101472	101472	G	T	hom	30
upstream;downstream	gene_3456;gene_3457	estExt_Genemark1.C_320029;fgenesh1_kg.32_#_53_#_Locus3433v1rpkm28.90	scaffold_32	101474	101474	A	T	hom	30
upstream;downstream	gene_3456;gene_3457	estExt_Genemark1.C_320029;fgenesh1_kg.32_#_53_#_Locus3433v1rpkm28.90	scaffold_32	101475	101475	A	T	hom	30
upstream;downstream	gene_3456;gene_3457	estExt_Genemark1.C_320029;fgenesh1_kg.32_#_53_#_Locus3433v1rpkm28.90	scaffold_32	101476	101476	A	T	hom	30
upstream;downstream	gene_3456;gene_3457	estExt_Genemark1.C_320029;fgenesh1_kg.32_#_53_#_Locus3433v1rpkm28.90	scaffold_32	101477	101477	C	T	hom	30
upstream;downstream	gene_3456;gene_3457	estExt_Genemark1.C_320029;fgenesh1_kg.32_#_53_#_Locus3433v1rpkm28.90	scaffold_32	101478	101478	G	T	hom	30
upstream;downstream	gene_3456;gene_3457	estExt_Genemark1.C_320029;fgenesh1_kg.32_#_53_#_Locus3433v1rpkm28.90	scaffold_32	101479	101479	G	T	hom	30
upstream;downstream	gene_3456;gene_3457	estExt_Genemark1.C_320029;fgenesh1_kg.32_#_53_#_Locus3433v1rpkm28.90	scaffold_32	101480	101480	C	T	hom	30
upstream;downstream	gene_3456;gene_3457	estExt_Genemark1.C_320029;fgenesh1_kg.32_#_53_#_Locus3433v1rpkm28.90	scaffold_32	101481	101481	G	T	hom	30
upstream;downstream	gene_3456;gene_3457	estExt_Genemark1.C_320029;fgenesh1_kg.32_#_53_#_Locus3433v1rpkm28.90	scaffold_32	101482	101482	A	T	hom	30
upstream;downstream	gene_3456;gene_3457	estExt_Genemark1.C_320029;fgenesh1_kg.32_#_53_#_Locus3433v1rpkm28.90	scaffold_32	101483	101483	C	T	hom	30
intronic	gene_3469	gm1.2818_g	scaffold_32	130005	130005	G	A	hom	30
exonic	gene_3474	fgenesh1_pg.32_#_45	scaffold_32	141831	141831	C	T	hom	30
intergenic	NONE(dist=NONE),gene_3486(dist=1229)	NONE(dist=NONE),gm1.2833_g(dist=1229)	scaffold_33	472	472	A	T	hom	30
intergenic	gene_3525(dist=1502),gene_3526(dist=1289)	estExt_fgenesh1_pm.C_330019(dist=1502),estExt_Genewise1.C_330052(dist=1289)	scaffold_33	77044	77044	G	A	hom	30
intergenic	gene_3525(dist=1581),gene_3526(dist=1210)	estExt_fgenesh1_pm.C_330019(dist=1581),estExt_Genewise1.C_330052(dist=1210)	scaffold_33	77123	77123	A	G	hom	30
exonic	gene_3526	estExt_Genewise1.C_330052	scaffold_33	79776	79776	T	C	hom	30
exonic	gene_3528	fgenesh1_kg.33_#_38_#_Locus1289v1rpkm115.34	scaffold_33	84364	84364	G	A	hom	30
exonic	gene_3530	fgenesh1_kg.33_#_41_#_Locus3617v1rpkm26.28	scaffold_33	91985	91985	G	A	hom	30
exonic	gene_3542	estExt_Genewise1.C_330077	scaffold_33	112882	112882	G	A	hom	30
exonic	gene_3544	fgenesh1_pg.33_#_37	scaffold_33	117803	117803	G	A	hom	30
exonic	gene_3544	fgenesh1_pg.33_#_37	scaffold_33	118402	118402	G	C	hom	30
downstream	gene_3547	estExt_fgenesh1_pm.C_330032	scaffold_33	126168	126168	G	A	hom	30
exonic	gene_3552	CE219596_2529,fgenesh1_kg.33_#_70_#_Locus1019v3rpkm0.00_PRE	scaffold_33	134339	134339	A	T	hom	30
exonic	gene_3552	CE219596_2529,fgenesh1_kg.33_#_70_#_Locus1019v3rpkm0.00_PRE	scaffold_33	134342	134342	C	T	hom	30
exonic	gene_3552	CE219596_2529,fgenesh1_kg.33_#_70_#_Locus1019v3rpkm0.00_PRE	scaffold_33	134349	134349	A	T	hom	30
exonic	gene_3552	CE219596_2529,fgenesh1_kg.33_#_70_#_Locus1019v3rpkm0.00_PRE	scaffold_33	134350	134350	C	T	hom	30
exonic	gene_3553	fgenesh1_kg.33_#_70_#_Locus1019v3rpkm0.00_PRE	scaffold_33	135657	135657	A	G	hom	30
exonic	gene_3557	MIX11729_16473_87	scaffold_33	140364	140364	T	C	hom	30
exonic	gene_3561	gm1.2879_g	scaffold_33	147690	147690	G	T	hom	30
upstream	gene_3561,gene_3562	fgenesh1_kg.33_#_76_#_Locus434v1rpkm420.25,gm1.2879_g	scaffold_33	148264	148264	T	C	hom	30
upstream;downstream	gene_3567;gene_3568	estExt_fgenesh1_pm.C_330042;CE220003_134	scaffold_33	159943	159943	C	T	hom	30
exonic	gene_3569	estExt_Genewise1.C_330116	scaffold_33	162795	162795	A	C	hom	30
exonic	gene_3579	estExt_Genemark1.C_340005	scaffold_34	16145	16145	C	T	hom	30
exonic	gene_3590	estExt_Genewise1Plus.C_340030	scaffold_34	44694	44694	G	T	hom	30
intronic	gene_3605	estExt_Genewise1.C_340063	scaffold_34	81422	81422	G	T	hom	30
UTR3	gene_3606	fgenesh1_kg.34_#_28_#_Locus370v1rpkm489.20	scaffold_34	83586	83586	A	G	hom	30
exonic	gene_3608	fgenesh1_pg.34_#_31	scaffold_34	87588	87588	G	A	hom	30
UTR5	gene_3610	CE221206_7073	scaffold_34	89914	89914	C	T	hom	30
upstream	gene_3617	gm1.2930_g	scaffold_34	102060	102060	T	C	hom	30
intergenic	gene_3620(dist=7310),gene_3622(dist=1453)	fgenesh1_pm.34_#_32(dist=7310),CE221633_119069(dist=1453)	scaffold_34	116915	116915	G	A	hom	30
intergenic	gene_3620(dist=7313),gene_3622(dist=1450)	fgenesh1_pm.34_#_32(dist=7313),CE221633_119069(dist=1450)	scaffold_34	116918	116918	A	T	hom	30
intergenic	gene_3620(dist=7314),gene_3622(dist=1449)	fgenesh1_pm.34_#_32(dist=7314),CE221633_119069(dist=1449)	scaffold_34	116919	116919	G	C	hom	30
intergenic	gene_3620(dist=7316),gene_3622(dist=1447)	fgenesh1_pm.34_#_32(dist=7316),CE221633_119069(dist=1447)	scaffold_34	116921	116921	G	T	hom	30
intergenic	gene_3620(dist=7319),gene_3622(dist=1444)	fgenesh1_pm.34_#_32(dist=7319),CE221633_119069(dist=1444)	scaffold_34	116924	116924	G	A	hom	30
intergenic	gene_3620(dist=7322),gene_3622(dist=1441)	fgenesh1_pm.34_#_32(dist=7322),CE221633_119069(dist=1441)	scaffold_34	116927	116927	A	G	hom	30
intergenic	gene_3620(dist=7329),gene_3622(dist=1434)	fgenesh1_pm.34_#_32(dist=7329),CE221633_119069(dist=1434)	scaffold_34	116934	116934	C	G	hom	30
intergenic	gene_3620(dist=7331),gene_3622(dist=1432)	fgenesh1_pm.34_#_32(dist=7331),CE221633_119069(dist=1432)	scaffold_34	116936	116936	T	A	hom	30
intergenic	gene_3620(dist=7334),gene_3622(dist=1429)	fgenesh1_pm.34_#_32(dist=7334),CE221633_119069(dist=1429)	scaffold_34	116939	116939	A	G	hom	30
intergenic	gene_3620(dist=7337),gene_3622(dist=1426)	fgenesh1_pm.34_#_32(dist=7337),CE221633_119069(dist=1426)	scaffold_34	116942	116942	G	A	hom	30
intergenic	gene_3620(dist=7415),gene_3622(dist=1348)	fgenesh1_pm.34_#_32(dist=7415),CE221633_119069(dist=1348)	scaffold_34	117020	117020	T	A	hom	30
intergenic	gene_3620(dist=7421),gene_3622(dist=1342)	fgenesh1_pm.34_#_32(dist=7421),CE221633_119069(dist=1342)	scaffold_34	117026	117026	A	G	hom	30
intergenic	gene_3620(dist=7424),gene_3622(dist=1339)	fgenesh1_pm.34_#_32(dist=7424),CE221633_119069(dist=1339)	scaffold_34	117029	117029	A	G	hom	30
intergenic	gene_3620(dist=7463),gene_3622(dist=1300)	fgenesh1_pm.34_#_32(dist=7463),CE221633_119069(dist=1300)	scaffold_34	117068	117068	G	A	hom	30
intergenic	gene_3620(dist=7472),gene_3622(dist=1291)	fgenesh1_pm.34_#_32(dist=7472),CE221633_119069(dist=1291)	scaffold_34	117077	117077	G	A	hom	30
intergenic	gene_3620(dist=7475),gene_3622(dist=1288)	fgenesh1_pm.34_#_32(dist=7475),CE221633_119069(dist=1288)	scaffold_34	117080	117080	G	A	hom	30
intergenic	gene_3620(dist=7495),gene_3622(dist=1268)	fgenesh1_pm.34_#_32(dist=7495),CE221633_119069(dist=1268)	scaffold_34	117100	117100	C	T	hom	30
intergenic	gene_3620(dist=7496),gene_3622(dist=1267)	fgenesh1_pm.34_#_32(dist=7496),CE221633_119069(dist=1267)	scaffold_34	117101	117101	T	G	hom	30
intergenic	gene_3620(dist=7497),gene_3622(dist=1266)	fgenesh1_pm.34_#_32(dist=7497),CE221633_119069(dist=1266)	scaffold_34	117102	117102	A	G	hom	30
intergenic	gene_3620(dist=7501),gene_3622(dist=1262)	fgenesh1_pm.34_#_32(dist=7501),CE221633_119069(dist=1262)	scaffold_34	117106	117106	A	C	hom	30
intergenic	gene_3620(dist=7586),gene_3622(dist=1177)	fgenesh1_pm.34_#_32(dist=7586),CE221633_119069(dist=1177)	scaffold_34	117191	117191	T	A	hom	30
intergenic	gene_3620(dist=7595),gene_3622(dist=1168)	fgenesh1_pm.34_#_32(dist=7595),CE221633_119069(dist=1168)	scaffold_34	117200	117200	A	T	hom	30
intergenic	gene_3620(dist=7601),gene_3622(dist=1162)	fgenesh1_pm.34_#_32(dist=7601),CE221633_119069(dist=1162)	scaffold_34	117206	117206	G	A	hom	30
intergenic	gene_3620(dist=7604),gene_3622(dist=1159)	fgenesh1_pm.34_#_32(dist=7604),CE221633_119069(dist=1159)	scaffold_34	117209	117209	G	A	hom	30
exonic	gene_3622	CE221633_119069	scaffold_34	119900	119900	A	G	hom	30
exonic	gene_3629	fgenesh1_kg.34_#_51_#_Locus718v1rpkm230.12	scaffold_34	133692	133692	A	G	hom	30
exonic	gene_3634	e_gw1.34.123.1	scaffold_34	148503	148503	T	C	hom	30
downstream	gene_3637	estExt_Genemark1.C_340054	scaffold_34	154507	154507	A	G	hom	30
upstream;downstream	gene_3652;gene_3651	fgenesh1_kg.35_#_10_#_Locus1113v1rpkm138.63;gm1.2956_g	scaffold_35	18485	18485	C	T	hom	30
upstream;downstream	gene_3665;gene_3666	fgenesh1_kg.35_#_23_#_Locus804v1rpkm205.71;fgenesh1_pg.35_#_16	scaffold_35	42699	42699	C	G	hom	30
exonic	gene_3668	estExt_Genemark1.C_350017	scaffold_35	50612	50612	A	G	hom	30
exonic	gene_3674	fgenesh1_kg.35_#_30_#_Locus2838v1rpkm38.99	scaffold_35	75167	75167	T	C	hom	30
upstream	gene_3674,gene_3675	fgenesh1_kg.35_#_30_#_Locus2838v1rpkm38.99,fgenesh1_kg.35_#_31_#_Locus3619v1rpkm26.24	scaffold_35	75654	75654	C	T	hom	30
exonic	gene_3677	fgenesh1_kg.35_#_32_#_Locus2524v1rpkm46.43	scaffold_35	80221	80221	G	A	hom	30
UTR5	gene_3679,gene_3680	CE224780_151,fgenesh1_kg.35_#_33_#_Locus3265v1rpkm31.42	scaffold_35	88357	88357	G	A	hom	30
exonic	gene_3681	CE224754_130	scaffold_35	89827	89827	T	G	hom	30
exonic	gene_3681	CE224754_130	scaffold_35	89879	89879	A	T	hom	30
downstream	gene_3683	CE224751_15587	scaffold_35	91826	91826	A	C	hom	30
downstream	gene_3683	CE224751_15587	scaffold_35	91830	91830	A	G	hom	30
downstream	gene_3683	CE224751_15587	scaffold_35	91835	91835	A	C	hom	30
downstream	gene_3683	CE224751_15587	scaffold_35	91839	91839	A	G	hom	30
downstream	gene_3683	CE224751_15587	scaffold_35	91844	91844	A	C	hom	30
exonic	gene_3687	fgenesh1_kg.35_#_42_#_Locus2929v1rpkm37.34	scaffold_35	113945	113945	C	T	hom	30
exonic	gene_3689	fgenesh1_kg.35_#_45_#_Locus10440v1rpkm1.32	scaffold_35	117733	117733	G	A	hom	30
exonic	gene_3692	fgenesh1_kg.35_#_48_#_Locus7384v1rpkm3.50	scaffold_35	121123	121123	T	C	hom	30
exonic	gene_3695	estExt_Genewise1.C_350094	scaffold_35	127664	127664	T	C	hom	30
exonic	gene_3696	estExt_Genewise1.C_350095	scaffold_35	131004	131004	T	G	hom	30
exonic	gene_3696	estExt_Genewise1.C_350095	scaffold_35	131582	131582	A	G	hom	30
exonic	gene_3696	estExt_Genewise1.C_350095	scaffold_35	131678	131678	G	A	hom	30
exonic	gene_3705	fgenesh1_pg.35_#_47	scaffold_35	150625	150625	C	A	hom	30
exonic	gene_3708	e_gw1.35.56.1	scaffold_35	159006	159006	A	G	hom	30
downstream	gene_3709	estExt_Genemark1.C_350049	scaffold_35	165471	165471	G	A	hom	30
upstream	gene_3711	fgenesh1_kg.35_#_66_#_Locus9v1rpkm14780.23	scaffold_35	173202	173202	G	A	hom	30
upstream	gene_3711	fgenesh1_kg.35_#_66_#_Locus9v1rpkm14780.23	scaffold_35	173352	173352	G	T	hom	30
exonic	gene_3715	e_gw1.36.139.1	scaffold_36	8365	8365	G	A	hom	30
exonic	gene_3717	fgenesh1_kg.36_#_9_#_Locus2040v1rpkm63.64	scaffold_36	13056	13056	T	C	hom	30
exonic	gene_3717	fgenesh1_kg.36_#_9_#_Locus2040v1rpkm63.64	scaffold_36	15555	15555	C	T	hom	30
exonic	gene_3729	fgenesh1_kg.36_#_30_#_Locus653v1rpkm260.61	scaffold_36	36041	36041	T	G	hom	30
upstream	gene_3730	CE227051_536	scaffold_36	38094	38094	A	T	hom	30
upstream	gene_3730	CE227051_536	scaffold_36	38095	38095	A	T	hom	30
upstream	gene_3730	CE227051_536	scaffold_36	38096	38096	A	T	hom	30
upstream	gene_3730	CE227051_536	scaffold_36	38116	38116	C	T	hom	30
upstream	gene_3730	CE227051_536	scaffold_36	38117	38117	A	G	hom	30
upstream;downstream	gene_3730;gene_3731	CE227051_536;CE227007_5634	scaffold_36	38374	38374	C	T	hom	30
UTR5	gene_3730	CE227051_536	scaffold_36	38415	38415	G	T	hom	30
UTR5	gene_3730	CE227051_536	scaffold_36	38422	38422	C	T	hom	30
upstream;downstream	gene_3733;gene_3732	fgenesh1_kg.36_#_34_#_Locus2453v2rpkm7.85;fgenesh1_kg.36_#_32_#_Locus7086v1rpkm4.06	scaffold_36	41817	41817	G	A	hom	30
UTR5	gene_3741	CE227465_10411	scaffold_36	59149	59149	G	A	hom	30
upstream;downstream	gene_3756;gene_3755	fgenesh1_kg.36_#_59_#_Locus2562v1rpkm45.43;fgenesh1_kg.36_#_58_#_Locus3830v1rpkm23.88	scaffold_36	96241	96241	C	A	hom	30
upstream;downstream	gene_3756;gene_3755	fgenesh1_kg.36_#_59_#_Locus2562v1rpkm45.43;fgenesh1_kg.36_#_58_#_Locus3830v1rpkm23.88	scaffold_36	96243	96243	G	T	hom	30
upstream	gene_3766	CE228834_5263	scaffold_36	115677	115677	T	G	hom	30
UTR5	gene_3772	estExt_fgenesh1_pm.C_360037	scaffold_36	142111	142111	C	T	hom	30
exonic	gene_3794	fgenesh1_kg.37_#_13_#_Locus1262v1rpkm118.55	scaffold_37	14231	14231	T	C	hom	30
exonic	gene_3796	fgenesh1_kg.37_#_15_#_Locus5671v1rpkm8.82	scaffold_37	19804	19804	C	T	hom	30
exonic	gene_3806	fgenesh1_pm.37_#_13	scaffold_37	39995	39995	G	A	hom	30
UTR3	gene_3809	MIX12203_225_94	scaffold_37	47009	47009	G	T	hom	30
exonic	gene_3813	fgenesh1_pm.37_#_17	scaffold_37	55676	55676	T	C	hom	30
exonic	gene_3818	fgenesh1_kg.37_#_37_#_Locus5408v1rpkm10.16	scaffold_37	64739	64739	G	A	hom	30
UTR5	gene_3818	fgenesh1_kg.37_#_37_#_Locus5408v1rpkm10.16	scaffold_37	66809	66809	G	A	hom	30
exonic	gene_3819	fgenesh1_pm.37_#_21	scaffold_37	68668	68668	A	G	hom	30
upstream	gene_3828	CE230853_63	scaffold_37	89781	89781	A	C	hom	30
downstream	gene_3828	CE230853_63	scaffold_37	91050	91050	C	T	hom	30
upstream	gene_3829	gm1.3106_g	scaffold_37	92206	92206	C	T	hom	30
intronic	gene_3834	CE230937_976	scaffold_37	99420	99420	G	A	hom	30
exonic	gene_3836	estExt_Genewise1Plus.C_370090	scaffold_37	102279	102279	G	A	hom	30
exonic	gene_3840	gm1.3113_g	scaffold_37	109775	109775	C	T	hom	30
exonic	gene_3840	gm1.3113_g	scaffold_37	109858	109858	A	G	hom	30
downstream	gene_3850	estExt_fgenesh1_pg.C_370050	scaffold_37	134318	134318	C	T	hom	30
intronic	gene_3855	e_gw1.37.41.1	scaffold_37	143638	143638	A	T	hom	30
exonic	gene_3871	CE232137_1553	scaffold_38	2676	2676	C	T	hom	30
intergenic	gene_3877(dist=3315),gene_3878(dist=2444)	estExt_Genewise1.C_380013(dist=3315),e_gw1.38.53.1(dist=2444)	scaffold_38	21876	21876	C	A	hom	30
upstream;downstream	gene_3903;gene_3902	estExt_Genewise1Plus.C_380079;fgenesh1_kg.38_#_36_#_Locus4225v1rpkm19.58	scaffold_38	89601	89601	A	G	hom	30
exonic	gene_3903	estExt_Genewise1Plus.C_380079	scaffold_38	90813	90813	C	T	hom	30
exonic	gene_3913	fgenesh1_pm.38_#_29	scaffold_38	114650	114650	C	T	hom	30
upstream	gene_3921,gene_3922	fgenesh1_kg.38_#_52_#_Locus3957v1rpkm22.25,gm1.3175_g	scaffold_38	140350	140350	C	T	hom	30
exonic	gene_3923	fgenesh1_kg.38_#_53_#_Locus2525v1rpkm46.38	scaffold_38	144951	144951	A	G	hom	30
exonic	gene_3931	fgenesh1_kg.38_#_63_#_Locus4707v1rpkm15.02	scaffold_38	162955	162955	T	C	hom	30
exonic	gene_3936	e_gw1.38.151.1	scaffold_38	169906	169906	A	G	hom	30
exonic	gene_3941	fgenesh1_kg.39_#_7_#_Locus1868v1rpkm71.40	scaffold_39	10916	10916	A	T	hom	30
exonic	gene_3948	estExt_Genewise1.C_390025	scaffold_39	22627	22627	G	A	hom	30
intronic	gene_3950	estExt_fgenesh1_pm.C_390010	scaffold_39	25736	25736	T	C	hom	30
exonic	gene_3950	estExt_fgenesh1_pm.C_390010	scaffold_39	26555	26555	G	A	hom	30
exonic	gene_3954	fgenesh1_kg.39_#_19_#_Locus4722v1rpkm14.91	scaffold_39	39128	39128	A	G	hom	30
exonic	gene_3965	e_gw1.39.56.1	scaffold_39	58801	58801	C	T	hom	30
upstream;downstream	gene_3975;gene_3974	gw1.39.122.1;estExt_fgenesh1_pm.C_390024	scaffold_39	76180	76180	T	C	hom	30
UTR3	gene_3985	estExt_fgenesh1_pm.C_390030	scaffold_39	95899	95899	T	C	hom	30
exonic	gene_3991	e_gw1.39.135.1	scaffold_39	106059	106059	G	A	hom	30
exonic	gene_3995	fgenesh1_kg.39_#_68_#_Locus2699v1rpkm41.91	scaffold_39	119596	119596	A	G	hom	30
upstream	gene_3996,gene_3997	fgenesh1_kg.39_#_72_#_Locus10478v3rpkm0.70,fgenesh1_kg.39_#_73_#_Locus3930v1rpkm22.52	scaffold_39	121709	121709	G	A	hom	30
exonic	gene_4008	fgenesh1_kg.39_#_91_#_Locus10936v1rpkm1.17	scaffold_39	140423	140423	G	A	hom	30
downstream	gene_4016	e_gw1.39.147.1	scaffold_39	155948	155948	G	A	hom	30
upstream	gene_4019	CE239259_7002	scaffold_39	161526	161526	C	T	hom	30
intronic	gene_4023	gm1.3258_g	scaffold_39	169873	169873	C	T	hom	30
upstream	gene_4023	gm1.3258_g	scaffold_39	171301	171301	C	T	hom	30
upstream	gene_4023	gm1.3258_g	scaffold_39	171403	171403	T	C	hom	30
exonic	gene_487	e_gw1.4.25.1	scaffold_4	1485	1485	G	A	hom	30
exonic	gene_493	fgenesh1_kg.4_#_6_#_Locus8766v1rpkm2.09	scaffold_4	12880	12880	T	C	hom	30
upstream	gene_496	estExt_fgenesh1_pg.C_40009	scaffold_4	20357	20357	A	G	hom	30
upstream	gene_498	gm1.391_g	scaffold_4	20658	20658	A	T	hom	30
upstream	gene_498	gm1.391_g	scaffold_4	20659	20659	C	G	hom	30
upstream	gene_498	gm1.391_g	scaffold_4	20660	20660	A	T	hom	30
intronic	gene_504	fgenesh1_kg.4_#_17_#_Locus1037v1rpkm149.75	scaffold_4	32444	32444	C	T	hom	30
downstream	gene_510	fgenesh1_kg.4_#_29_#_Locus7572v1rpkm3.22	scaffold_4	53112	53112	G	T	hom	30
upstream	gene_511	fgenesh1_pm.4_#_9	scaffold_4	56839	56839	C	T	hom	30
exonic	gene_517	CE240182_5665	scaffold_4	68220	68220	C	T	hom	30
exonic	gene_517	CE240182_5665	scaffold_4	69011	69011	A	G	hom	30
exonic	gene_519	e_gw1.4.12.1	scaffold_4	71523	71523	A	G	hom	30
intergenic	gene_543(dist=1317),gene_544(dist=1176)	fgenesh1_kg.4_#_66_#_Locus4551v1rpkm16.42(dist=1317),gm1.429_g(dist=1176)	scaffold_4	126365	126365	C	G	hom	30
upstream	gene_544	gm1.429_g	scaffold_4	126915	126915	T	C	hom	30
exonic	gene_545	gm1.430_g	scaffold_4	129833	129833	A	G	hom	30
upstream;downstream	gene_545;gene_546	gm1.430_g;e_gw1.4.40.1	scaffold_4	131869	131869	C	A	hom	30
UTR5	gene_606	fgenesh1_kg.4_#_134_#_Locus5831v2rpkm3.69	scaffold_4	289212	289212	C	T	hom	30
downstream	gene_606,gene_607	estExt_fgenesh1_pg.C_40103,fgenesh1_kg.4_#_134_#_Locus5831v2rpkm3.69	scaffold_4	291286	291286	T	G	hom	30
downstream	gene_606,gene_607	estExt_fgenesh1_pg.C_40103,fgenesh1_kg.4_#_134_#_Locus5831v2rpkm3.69	scaffold_4	291293	291293	T	C	hom	30
intergenic	gene_609(dist=2302),gene_610(dist=1745)	fgenesh1_pm.4_#_68(dist=2302),gm1.484_g(dist=1745)	scaffold_4	299002	299002	A	G	hom	30
upstream	gene_613	estExt_fgenesh1_pm.C_40069	scaffold_4	305725	305725	C	T	hom	30
exonic	gene_619	MIX12863_60_46	scaffold_4	321395	321395	G	A	hom	30
exonic	gene_627	estExt_Genemark1.C_40113	scaffold_4	337890	337890	G	A	hom	30
upstream	gene_630,gene_631	MIX12895_1_22,e_gw1.4.216.1	scaffold_4	344459	344459	G	A	hom	30
downstream	gene_632	estExt_Genemark1.C_40116	scaffold_4	347603	347603	A	G	hom	30
downstream	gene_632	estExt_Genemark1.C_40116	scaffold_4	347610	347610	C	T	hom	30
UTR3	gene_4036	fgenesh1_kg.40_#_16_#_Locus4718v1rpkm14.93	scaffold_40	52857	52857	C	T	hom	30
upstream;downstream	gene_4050;gene_4049	CE246850_846;e_gw1.40.122.1	scaffold_40	76829	76829	A	T	hom	30
UTR5	gene_4070	CE247531_2232	scaffold_40	118988	118988	A	C	hom	30
intergenic	gene_4082(dist=2215),gene_4083(dist=1267)	fgenesh1_kg.40_#_62_#_Locus2365v1rpkm50.79(dist=2215),fgenesh1_pg.40_#_47(dist=1267)	scaffold_40	152984	152984	G	A	hom	30
intergenic	gene_4082(dist=2217),gene_4083(dist=1265)	fgenesh1_kg.40_#_62_#_Locus2365v1rpkm50.79(dist=2217),fgenesh1_pg.40_#_47(dist=1265)	scaffold_40	152986	152986	C	A	hom	30
exonic	gene_4083	fgenesh1_pg.40_#_47	scaffold_40	155788	155788	A	G	hom	30
intergenic	NONE(dist=NONE),gene_4092(dist=1726)	NONE(dist=NONE),fgenesh1_kg.41_#_1_#_Locus3411v1rpkm29.10(dist=1726)	scaffold_41	1518	1518	G	T	hom	30
intergenic	NONE(dist=NONE),gene_4092(dist=1724)	NONE(dist=NONE),fgenesh1_kg.41_#_1_#_Locus3411v1rpkm29.10(dist=1724)	scaffold_41	1520	1520	A	C	hom	30
intergenic	NONE(dist=NONE),gene_4092(dist=1602)	NONE(dist=NONE),fgenesh1_kg.41_#_1_#_Locus3411v1rpkm29.10(dist=1602)	scaffold_41	1642	1642	A	G	hom	30
exonic	gene_4098	estExt_fgenesh1_pm.C_410004	scaffold_41	18552	18552	G	T	hom	30
exonic	gene_4098	estExt_fgenesh1_pm.C_410004	scaffold_41	18577	18577	G	A	hom	30
upstream;downstream	gene_4114;gene_4113	CE250452_1623;e_gw1.41.83.1	scaffold_41	54787	54787	A	T	hom	30
exonic	gene_4130	gw1.41.126.1	scaffold_41	85329	85329	A	G	hom	30
exonic	gene_4135	e_gw1.41.89.1	scaffold_41	99418	99418	G	C	hom	30
downstream	gene_4135,gene_4136,gene_4137	CE251781_514,e_gw1.41.73.1,e_gw1.41.89.1	scaffold_41	99890	99890	T	C	hom	30
downstream	gene_4135,gene_4136,gene_4137	CE251781_514,e_gw1.41.73.1,e_gw1.41.89.1	scaffold_41	99907	99907	A	G	hom	30
downstream	gene_4135,gene_4136,gene_4137	CE251781_514,e_gw1.41.73.1,e_gw1.41.89.1	scaffold_41	99916	99916	G	A	hom	30
downstream	gene_4135,gene_4136,gene_4137	CE251781_514,e_gw1.41.73.1,e_gw1.41.89.1	scaffold_41	99949	99949	C	T	hom	30
downstream	gene_4135,gene_4136,gene_4137	CE251781_514,e_gw1.41.73.1,e_gw1.41.89.1	scaffold_41	99951	99951	T	C	hom	30
exonic	gene_4142	fgenesh1_kg.41_#_58_#_Locus15499v1rpkm0.35	scaffold_41	110309	110309	T	C	hom	30
intergenic	gene_4142(dist=1522),gene_4144(dist=1674)	fgenesh1_kg.41_#_58_#_Locus15499v1rpkm0.35(dist=1522),fgenesh1_kg.41_#_59_#_Locus5729v1rpkm8.51(dist=1674)	scaffold_41	111952	111952	G	A	hom	30
upstream	gene_4169	CE252899_834	scaffold_42	3951	3951	C	A	hom	30
intronic	gene_4210	MIX13282_5250_62	scaffold_42	81549	81549	A	C	hom	30
intronic	gene_4210	MIX13282_5250_62	scaffold_42	81853	81853	A	G	hom	30
exonic	gene_4215	fgenesh1_kg.42_#_50_#_Locus10736v2rpkm0.87	scaffold_42	88922	88922	G	C	hom	30
upstream	gene_4216	fgenesh1_pm.42_#_26	scaffold_42	90731	90731	A	T	hom	30
intergenic	gene_4224(dist=2576),gene_4225(dist=5329)	fgenesh1_kg.42_#_58_#_Locus9856v1rpkm1.51(dist=2576),fgenesh1_kg.42_#_59_#_Locus4323v3rpkm0.54_PRE(dist=5329)	scaffold_42	109171	109171	G	A	hom	30
intronic	gene_4240	estExt_Genemark1.C_420051	scaffold_42	149375	149375	G	A	hom	30
downstream	gene_4249	fgenesh1_kg.42_#_82_#_Locus3592v1rpkm26.64	scaffold_42	165535	165535	G	T	hom	30
downstream	gene_4254	fgenesh1_pg.43_#_5	scaffold_43	9141	9141	A	G	hom	30
downstream	gene_4254	fgenesh1_pg.43_#_5	scaffold_43	9146	9146	C	T	hom	30
exonic	gene_4263	estExt_Genewise1Plus.C_430030	scaffold_43	26186	26186	T	C	hom	30
exonic	gene_4264	gm1.3442_g	scaffold_43	28567	28567	C	T	hom	30
intergenic	gene_4265(dist=2876),gene_4268(dist=1736)	MIX13376_23_96(dist=2876),estExt_Genewise1Plus.C_430033(dist=1736)	scaffold_43	32512	32512	C	T	hom	30
upstream	gene_4268	estExt_Genewise1Plus.C_430033	scaffold_43	33748	33748	A	G	hom	30
exonic	gene_4272	fgenesh1_kg.43_#_19_#_Locus5487v1rpkm9.83	scaffold_43	44610	44610	A	G	hom	30
exonic	gene_4274	e_gw1.43.40.1	scaffold_43	51000	51000	A	G	hom	30
exonic	gene_4278	e_gw1.43.140.1	scaffold_43	58941	58941	G	A	hom	30
exonic	gene_4280	fgenesh1_kg.43_#_26_#_Locus484v1rpkm367.75	scaffold_43	65449	65449	G	A	hom	30
upstream	gene_4284,gene_4285	estExt_Genemark1.C_430028,fgenesh1_kg.43_#_32_#_Locus6327v1rpkm6.23	scaffold_43	76226	76226	G	A	hom	30
exonic	gene_4303	fgenesh1_kg.43_#_51_#_Locus12540v1rpkm0.82	scaffold_43	112774	112774	C	T	hom	30
exonic	gene_4303	fgenesh1_kg.43_#_51_#_Locus12540v1rpkm0.82	scaffold_43	112780	112780	C	T	hom	30
exonic	gene_4303	fgenesh1_kg.43_#_51_#_Locus12540v1rpkm0.82	scaffold_43	112826	112826	A	G	hom	30
exonic	gene_4303	fgenesh1_kg.43_#_51_#_Locus12540v1rpkm0.82	scaffold_43	112831	112831	C	T	hom	30
exonic	gene_4303	fgenesh1_kg.43_#_51_#_Locus12540v1rpkm0.82	scaffold_43	112989	112989	C	T	hom	30
exonic	gene_4303	fgenesh1_kg.43_#_51_#_Locus12540v1rpkm0.82	scaffold_43	113008	113008	G	T	hom	30
exonic	gene_4303	fgenesh1_kg.43_#_51_#_Locus12540v1rpkm0.82	scaffold_43	113029	113029	T	C	hom	30
intronic	gene_4336	fgenesh1_kg.44_#_21_#_Locus7081v2rpkm2.49	scaffold_44	35457	35457	G	A	hom	30
exonic	gene_4337	fgenesh1_pm.44_#_10	scaffold_44	38483	38483	G	A	hom	30
UTR5	gene_4352	estExt_Genemark1.C_440024	scaffold_44	65361	65361	C	T	hom	30
upstream;downstream	gene_4356;gene_4354	e_gw1.44.59.1;fgenesh1_kg.44_#_44_#_Locus8652v1rpkm2.17	scaffold_44	75808	75808	A	G	hom	30
[truncated: 998 more rows]

## Sheet: Table S6.
Table S6. Genome based SNPs analysis in M34.
Type	Affected ID	Affected ID	ContigID	Start	End	Ref	Alt	Heterozygous/homozygous SNPs	QualityValue
exonic	gene_8	gm1.5_g	scaffold_1	23077	23077	G	A	hom	30
downstream	gene_10	gm1.7_g	scaffold_1	31611	31611	T	A	hom	30
downstream	gene_11,gene_12	e_gw1.1.137.1,fgenesh1_pm.1_#_6	scaffold_1	36143	36143	T	A	hom	30
upstream	gene_15	MIX27_328_23	scaffold_1	41999	41999	T	G	hom	30
downstream	gene_15,gene_16	MIX27_328_23,estExt_Genewise1.C_10027	scaffold_1	46652	46652	G	T	hom	30
exonic	gene_20	estExt_Genemark1.C_10014	scaffold_1	58680	58680	C	T	hom	30
downstream	gene_21	fgenesh1_pm.1_#_13	scaffold_1	63609	63609	A	G	hom	30
intronic	gene_23	fgenesh1_kg.1_#_24_#_Locus1678v1rpkm83.43	scaffold_1	70078	70078	T	A	hom	30
downstream	gene_32	estExt_Genewise1Plus.C_10046	scaffold_1	87804	87804	T	C	hom	30
UTR3	gene_35	estExt_fgenesh1_pg.C_10029	scaffold_1	95654	95654	A	G	hom	30
exonic	gene_42	fgenesh1_kg.1_#_42_#_Locus1768v1rpkm76.96	scaffold_1	109801	109801	C	T	hom	30
exonic	gene_48	e_gw1.1.60.1	scaffold_1	130531	130531	G	A	hom	30
exonic	gene_48	e_gw1.1.60.1	scaffold_1	131125	131125	C	T	hom	30
upstream	gene_48,gene_49	CE1800_26,e_gw1.1.60.1	scaffold_1	133357	133357	C	T	hom	30
upstream	gene_48,gene_49	CE1800_26,e_gw1.1.60.1	scaffold_1	133365	133365	C	T	hom	30
upstream;downstream	gene_49;gene_50	CE1800_26;estExt_fgenesh1_pg.C_10041	scaffold_1	134065	134065	T	C	hom	30
upstream;downstream	gene_49;gene_50	CE1800_26;estExt_fgenesh1_pg.C_10041	scaffold_1	134066	134066	T	A	hom	30
upstream;downstream	gene_49;gene_50	CE1800_26;estExt_fgenesh1_pg.C_10041	scaffold_1	134073	134073	G	A	hom	30
upstream;downstream	gene_49;gene_50	CE1800_26;estExt_fgenesh1_pg.C_10041	scaffold_1	134080	134080	G	A	hom	30
upstream;downstream	gene_49;gene_50	CE1800_26;estExt_fgenesh1_pg.C_10041	scaffold_1	134108	134108	A	G	hom	30
upstream;downstream	gene_49;gene_50	CE1800_26;estExt_fgenesh1_pg.C_10041	scaffold_1	134123	134123	A	G	hom	30
upstream;downstream	gene_49;gene_50	CE1800_26;estExt_fgenesh1_pg.C_10041	scaffold_1	134143	134143	A	C	hom	30
upstream;downstream	gene_49;gene_50	CE1800_26;estExt_fgenesh1_pg.C_10041	scaffold_1	134146	134146	T	C	hom	30
upstream;downstream	gene_49;gene_50	CE1800_26;estExt_fgenesh1_pg.C_10041	scaffold_1	134176	134176	T	A	hom	30
exonic	gene_58	estExt_Genewise1Plus.C_10078	scaffold_1	153495	153495	A	T	hom	30
exonic	gene_58	estExt_Genewise1Plus.C_10078	scaffold_1	153496	153496	T	G	hom	30
exonic	gene_62	fgenesh1_kg.1_#_70_#_Locus3422v1rpkm28.99	scaffold_1	167495	167495	A	G	hom	30
exonic	gene_67	fgenesh1_kg.1_#_74_#_Locus6931v1rpkm4.39	scaffold_1	177681	177681	T	C	hom	30
intronic	gene_71	fgenesh1_pm.1_#_42	scaffold_1	186074	186074	A	C	hom	30
intergenic	gene_77(dist=1677),gene_78(dist=1686)	CE2607_9143(dist=1677),estExt_Genewise1Plus.C_10118(dist=1686)	scaffold_1	200921	200921	C	T	hom	30
intergenic	gene_77(dist=1683),gene_78(dist=1680)	CE2607_9143(dist=1683),estExt_Genewise1Plus.C_10118(dist=1680)	scaffold_1	200927	200927	C	A	hom	30
exonic	gene_78	estExt_Genewise1Plus.C_10118	scaffold_1	204178	204178	G	A	hom	30
intronic	gene_79	e_gw1.1.240.1	scaffold_1	206281	206281	T	G	hom	30
exonic	gene_82	estExt_fgenesh1_pm.C_10047	scaffold_1	210941	210941	G	A	hom	30
upstream	gene_82,gene_83	estExt_fgenesh1_pm.C_10047,fgenesh1_kg.1_#_92_#_Locus1958v1rpkm67.20	scaffold_1	213113	213113	T	C	hom	30
exonic	gene_85	gm1.63_g	scaffold_1	219151	219151	T	C	hom	30
exonic	gene_102	CE4093_8471	scaffold_1	263111	263111	C	T	hom	30
exonic	gene_102	CE4093_8471	scaffold_1	263317	263317	C	T	hom	30
downstream	gene_102	CE4093_8471	scaffold_1	264222	264222	C	A	hom	30
UTR3	gene_110	fgenesh1_kg.1_#_122_#_Locus3010v1rpkm35.71	scaffold_1	278141	278141	T	C	hom	30
exonic	gene_114	fgenesh1_kg.1_#_128_#_Locus6045v1rpkm7.20	scaffold_1	289129	289129	A	G	hom	30
exonic	gene_116	CE4321_1470	scaffold_1	294332	294332	C	T	hom	30
UTR5	gene_118	estExt_fgenesh1_pm.C_10070	scaffold_1	299706	299706	C	T	hom	30
exonic	gene_124	fgenesh1_kg.1_#_136_#_Locus7635v1rpkm3.12	scaffold_1	308042	308042	C	T	hom	30
downstream	gene_129	fgenesh1_kg.1_#_145_#_Locus5005v1rpkm12.62	scaffold_1	322015	322015	T	A	hom	30
exonic	gene_140	gm1.114_g	scaffold_1	351367	351367	T	C	hom	30
exonic	gene_141	gm1.115_g	scaffold_1	352990	352990	T	C	hom	30
exonic	gene_141	gm1.115_g	scaffold_1	353255	353255	A	G	hom	30
exonic	gene_141	gm1.115_g	scaffold_1	353748	353748	C	T	hom	30
upstream	gene_141	gm1.115_g	scaffold_1	354536	354536	T	C	hom	30
exonic	gene_143	estExt_Genemark1.C_10116	scaffold_1	357147	357147	A	C	hom	30
UTR3	gene_151	fgenesh1_kg.1_#_167_#_Locus3151v1rpkm33.20	scaffold_1	378242	378242	G	A	hom	30
intronic	gene_151	fgenesh1_kg.1_#_167_#_Locus3151v1rpkm33.20	scaffold_1	379916	379916	G	A	hom	30
downstream	gene_1274	estExt_Genewise1.C_100002	scaffold_10	401	401	G	A	hom	30
exonic	gene_1289	CE6821_5251	scaffold_10	36164	36164	C	T	hom	30
exonic	gene_1319	fgenesh1_kg.10_#_49_#_Locus5036v1rpkm12.44	scaffold_10	106374	106374	C	T	hom	30
UTR3	gene_1336	CE10120_5115	scaffold_10	137110	137110	C	G	hom	30
UTR3	gene_1336	CE10120_5115	scaffold_10	137118	137118	A	T	hom	30
intronic	gene_1366	fgenesh1_kg.10_#_86_#_Locus1549v1rpkm91.47	scaffold_10	215776	215776	C	T	hom	30
intronic	gene_1366	fgenesh1_kg.10_#_86_#_Locus1549v1rpkm91.47	scaffold_10	215780	215780	C	T	hom	30
intronic	gene_1366	fgenesh1_kg.10_#_86_#_Locus1549v1rpkm91.47	scaffold_10	215784	215784	C	T	hom	30
intronic	gene_1366	fgenesh1_kg.10_#_86_#_Locus1549v1rpkm91.47	scaffold_10	215786	215786	C	T	hom	30
intronic	gene_1366	fgenesh1_kg.10_#_86_#_Locus1549v1rpkm91.47	scaffold_10	215802	215802	T	G	hom	30
exonic	gene_1366	fgenesh1_kg.10_#_86_#_Locus1549v1rpkm91.47	scaffold_10	216270	216270	C	T	hom	30
exonic	gene_1372	fgenesh1_kg.10_#_94_#_Locus2990v1rpkm35.95	scaffold_10	228317	228317	T	G	hom	30
downstream	gene_1382,gene_1383	e_gw1.10.21.1,estExt_Genewise1.C_100147	scaffold_10	254751	254751	C	A	hom	30
upstream	gene_1384,gene_1385	fgenesh1_kg.10_#_109_#_Locus5901v1rpkm7.76,fgenesh1_kg.10_#_110_#_Locus1617v1rpkm87.26	scaffold_10	262944	262944	T	C	hom	30
UTR3	gene_1386	estExt_fgenesh1_pg.C_100096	scaffold_10	269335	269335	A	C	hom	30
intergenic	NONE(dist=NONE),gene_7150(dist=2602)	NONE(dist=NONE),fgenesh1_kg.100_#_1_#_Locus3033v2rpkm24.55(dist=2602)	scaffold_100	2133	2133	C	A	hom	30
upstream	gene_7159	fgenesh1_kg.100_#_9_#_Locus9724v1rpkm1.56	scaffold_100	22954	22954	C	T	hom	30
upstream	gene_7159	fgenesh1_kg.100_#_9_#_Locus9724v1rpkm1.56	scaffold_100	23428	23428	C	T	hom	30
upstream	gene_7159	fgenesh1_kg.100_#_9_#_Locus9724v1rpkm1.56	scaffold_100	23501	23501	A	G	hom	30
upstream	gene_7159	fgenesh1_kg.100_#_9_#_Locus9724v1rpkm1.56	scaffold_100	23502	23502	C	T	hom	30
upstream;downstream	gene_7161;gene_7160	fgenesh1_kg.100_#_11_#_Locus2357v1rpkm50.92;CE13229_2795	scaffold_100	23955	23955	G	T	hom	30
UTR3	gene_7163	fgenesh1_kg.100_#_13_#_Locus2640v1rpkm43.50	scaffold_100	29510	29510	C	T	hom	30
UTR3	gene_7173	CE13873_27815	scaffold_100	47879	47879	T	A	hom	30
exonic	gene_7182	fgenesh1_kg.100_#_36_#_Locus1193v2rpkm36.70,gm1.5812_g	scaffold_100	75633	75633	C	T	hom	30
UTR3	gene_7185	fgenesh1_kg.101_#_1_#_Locus1689v1rpkm82.74	scaffold_101	2307	2307	T	C	hom	30
exonic	gene_7189	fgenesh1_pg.101_#_5	scaffold_101	8171	8171	G	A	hom	30
upstream	gene_7195	fgenesh1_pm.101_#_9	scaffold_101	18704	18704	G	A	hom	30
exonic	gene_7200	estExt_Genewise1Plus.C_1010036	scaffold_101	31086	31086	G	A	hom	30
downstream	gene_7216	fgenesh1_kg.101_#_29_#_Locus4401v1rpkm17.97	scaffold_101	58841	58841	C	T	hom	30
downstream	gene_7216	fgenesh1_kg.101_#_29_#_Locus4401v1rpkm17.97	scaffold_101	59058	59058	A	G	hom	30
downstream	gene_7216	fgenesh1_kg.101_#_29_#_Locus4401v1rpkm17.97	scaffold_101	59150	59150	C	T	hom	30
downstream	gene_7216	fgenesh1_kg.101_#_29_#_Locus4401v1rpkm17.97	scaffold_101	59234	59234	C	T	hom	30
downstream	gene_7216	fgenesh1_kg.101_#_29_#_Locus4401v1rpkm17.97	scaffold_101	59267	59267	C	T	hom	30
downstream	gene_7216	fgenesh1_kg.101_#_29_#_Locus4401v1rpkm17.97	scaffold_101	59268	59268	A	G	hom	30
downstream	gene_7216	fgenesh1_kg.101_#_29_#_Locus4401v1rpkm17.97	scaffold_101	59293	59293	T	C	hom	30
exonic	gene_7239	e_gw1.102.49.1	scaffold_102	23170	23170	C	T	hom	30
splicing	gene_7259(mRNA_7259:exon5:c.589-2A>G)	estExt_fgenesh1_pm.C_1020025(estExt_fgenesh1_pm.C_1020025:exon5:c.675-2A>G)	scaffold_102	64360	64360	A	G	hom	30
exonic	gene_7260	gm1.5871_g	scaffold_102	65297	65297	C	T	hom	30
exonic	gene_7279	CE17297_12751	scaffold_103	23909	23909	G	T	hom	30
downstream	gene_7284,gene_7285	CE17650_8590,e_gw1.103.15.1	scaffold_103	38534	38534	A	G	hom	30
exonic	gene_7304	CE17991_813	scaffold_103	81103	81103	T	C	hom	30
exonic	gene_7318	e_gw1.104.45.1	scaffold_104	22937	22937	A	C	hom	30
UTR5	gene_7322	fgenesh1_kg.104_#_14_#_Locus4547v1rpkm16.51	scaffold_104	30922	30922	C	T	hom	30
intergenic	gene_7337(dist=3664),gene_7338(dist=1006)	estExt_fgenesh1_pm.C_1040022(dist=3664),fgenesh1_kg.104_#_35_#_Locus4001v1rpkm21.86(dist=1006)	scaffold_104	74633	74633	G	A	hom	30
exonic	gene_7339	fgenesh1_pg.104_#_26	scaffold_104	81354	81354	G	A	hom	30
upstream	gene_7342	fgenesh1_kg.105_#_1_#_Locus3377v1rpkm29.65	scaffold_105	255	255	A	G	hom	30
upstream;downstream	gene_7347;gene_7346	fgenesh1_pg.105_#_5;fgenesh1_kg.105_#_5_#_Locus14163v1rpkm0.53	scaffold_105	13029	13029	C	T	hom	30
upstream;downstream	gene_7347;gene_7346	fgenesh1_pg.105_#_5;fgenesh1_kg.105_#_5_#_Locus14163v1rpkm0.53	scaffold_105	13033	13033	A	G	hom	30
upstream;downstream	gene_7347;gene_7346	fgenesh1_pg.105_#_5;fgenesh1_kg.105_#_5_#_Locus14163v1rpkm0.53	scaffold_105	13038	13038	A	G	hom	30
upstream;downstream	gene_7347;gene_7346	fgenesh1_pg.105_#_5;fgenesh1_kg.105_#_5_#_Locus14163v1rpkm0.53	scaffold_105	13043	13043	A	G	hom	30
upstream;downstream	gene_7347;gene_7346	fgenesh1_pg.105_#_5;fgenesh1_kg.105_#_5_#_Locus14163v1rpkm0.53	scaffold_105	13049	13049	C	T	hom	30
upstream;downstream	gene_7347;gene_7346	fgenesh1_pg.105_#_5;fgenesh1_kg.105_#_5_#_Locus14163v1rpkm0.53	scaffold_105	13061	13061	A	G	hom	30
exonic	gene_7347	fgenesh1_pg.105_#_5	scaffold_105	15870	15870	C	T	hom	30
exonic	gene_7354	estExt_fgenesh1_pm.C_1050008	scaffold_105	26878	26878	G	A	hom	30
exonic	gene_7371	estExt_fgenesh1_pg.C_1050020	scaffold_105	53923	53923	G	A	hom	30
downstream	gene_7378,gene_7379	estExt_Genewise1Plus.C_1050054,fgenesh1_kg.105_#_44_#_Locus7682v1rpkm3.05	scaffold_105	68038	68038	C	A	hom	30
downstream	gene_7378,gene_7379	estExt_Genewise1Plus.C_1050054,fgenesh1_kg.105_#_44_#_Locus7682v1rpkm3.05	scaffold_105	68227	68227	C	T	hom	30
exonic	gene_7379	fgenesh1_kg.105_#_44_#_Locus7682v1rpkm3.05	scaffold_105	68733	68733	A	G	hom	30
exonic	gene_7379	fgenesh1_kg.105_#_44_#_Locus7682v1rpkm3.05	scaffold_105	68793	68793	A	G	hom	30
exonic	gene_7379	fgenesh1_kg.105_#_44_#_Locus7682v1rpkm3.05	scaffold_105	68805	68805	A	G	hom	30
exonic	gene_7379	fgenesh1_kg.105_#_44_#_Locus7682v1rpkm3.05	scaffold_105	68825	68825	C	G	hom	30
intergenic	gene_7416(dist=1121),gene_7417(dist=1176)	CE22437_72380(dist=1121),gm1.5989_g(dist=1176)	scaffold_106	64910	64910	A	C	hom	30
upstream	gene_7427	estExt_fgenesh1_pm.C_1070001	scaffold_107	1266	1266	G	A	hom	30
downstream	gene_7434	fgenesh1_pm.107_#_5	scaffold_107	15553	15553	C	T	hom	30
intergenic	gene_7436(dist=1326),gene_7437(dist=1909)	fgenesh1_kg.107_#_7_#_Locus4102v1rpkm20.90(dist=1326),estExt_Genemark1.C_1070011(dist=1909)	scaffold_107	25243	25243	C	T	hom	30
downstream	gene_7444,gene_7445	fgenesh1_pg.107_#_17,fgenesh1_pm.107_#_13	scaffold_107	39567	39567	T	G	hom	30
exonic	gene_7446	fgenesh1_kg.107_#_14_#_Locus2639v1rpkm43.54	scaffold_107	53365	53365	A	G	hom	30
upstream;downstream	gene_7450;gene_7449	estExt_Genewise1Plus.C_1070060;estExt_fgenesh1_pg.C_1070021	scaffold_107	63855	63855	C	T	hom	30
upstream;downstream	gene_7450;gene_7449	estExt_Genewise1Plus.C_1070060;estExt_fgenesh1_pg.C_1070021	scaffold_107	63924	63924	T	C	hom	30
exonic	gene_7450	estExt_Genewise1Plus.C_1070060	scaffold_107	64548	64548	C	A	hom	30
exonic	gene_7454	gm1.6022_g	scaffold_107	78319	78319	A	G	hom	30
upstream	gene_7469	fgenesh1_kg.108_#_17_#_Locus3782v1rpkm24.33	scaffold_108	23941	23941	T	C	hom	30
upstream	gene_7469	fgenesh1_kg.108_#_17_#_Locus3782v1rpkm24.33	scaffold_108	23942	23942	G	A	hom	30
upstream	gene_7469	fgenesh1_kg.108_#_17_#_Locus3782v1rpkm24.33	scaffold_108	23971	23971	C	T	hom	30
upstream	gene_7469	fgenesh1_kg.108_#_17_#_Locus3782v1rpkm24.33	scaffold_108	23972	23972	A	G	hom	30
upstream	gene_7469	fgenesh1_kg.108_#_17_#_Locus3782v1rpkm24.33	scaffold_108	24056	24056	A	G	hom	30
upstream	gene_7469	fgenesh1_kg.108_#_17_#_Locus3782v1rpkm24.33	scaffold_108	24059	24059	C	T	hom	30
upstream	gene_7469	fgenesh1_kg.108_#_17_#_Locus3782v1rpkm24.33	scaffold_108	24069	24069	C	T	hom	30
upstream	gene_7469	fgenesh1_kg.108_#_17_#_Locus3782v1rpkm24.33	scaffold_108	24071	24071	A	G	hom	30
upstream	gene_7469	fgenesh1_kg.108_#_17_#_Locus3782v1rpkm24.33	scaffold_108	24118	24118	C	T	hom	30
intergenic	gene_7469(dist=1092),gene_7471(dist=2023)	fgenesh1_kg.108_#_17_#_Locus3782v1rpkm24.33(dist=1092),MIX1382_249_57(dist=2023)	scaffold_108	24780	24780	A	T	hom	30
intergenic	gene_7469(dist=1160),gene_7471(dist=1955)	fgenesh1_kg.108_#_17_#_Locus3782v1rpkm24.33(dist=1160),MIX1382_249_57(dist=1955)	scaffold_108	24848	24848	T	C	hom	30
upstream;downstream	gene_7478;gene_7479	MIX1392_15_54;e_gw1.108.59.1	scaffold_108	41312	41312	T	A	hom	30
exonic	gene_7482	fgenesh1_kg.108_#_30_#_Locus2441v1rpkm48.67	scaffold_108	50925	50925	C	T	hom	30
upstream	gene_7483,gene_7484	fgenesh1_kg.108_#_31_#_Locus6949v1rpkm4.35,fgenesh1_kg.108_#_32_#_Locus2068v1rpkm62.26	scaffold_108	54172	54172	G	T	hom	30
exonic	gene_7488	MIX1401_141_26	scaffold_108	60315	60315	G	A	hom	30
exonic	gene_7493	MIX1423_3229_7	scaffold_108	69589	69589	A	G	hom	30
exonic	gene_7493	MIX1423_3229_7	scaffold_108	72804	72804	A	G	hom	30
exonic	gene_7496	estExt_Genemark1.C_1090001	scaffold_109	3768	3768	A	G	hom	30
exonic	gene_7498	MIX1455_1825_15	scaffold_109	32592	32592	A	C	hom	30
exonic	gene_7502	MIX1469_614_32	scaffold_109	41030	41030	T	C	hom	30
intronic	gene_7502	MIX1469_614_32	scaffold_109	44640	44640	A	G	hom	30
downstream	gene_1388	CE25601_524	scaffold_11	730	730	T	C	hom	30
intergenic	gene_1390(dist=4455),gene_1392(dist=3851)	fgenesh1_pg.11_#_2(dist=4455),fgenesh1_kg.11_#_7_#_Locus5266v1rpkm10.98(dist=3851)	scaffold_11	12324	12324	T	C	hom	30
intergenic	gene_1390(dist=4456),gene_1392(dist=3850)	fgenesh1_pg.11_#_2(dist=4456),fgenesh1_kg.11_#_7_#_Locus5266v1rpkm10.98(dist=3850)	scaffold_11	12325	12325	G	C	hom	30
intergenic	gene_1390(dist=4472),gene_1392(dist=3834)	fgenesh1_pg.11_#_2(dist=4472),fgenesh1_kg.11_#_7_#_Locus5266v1rpkm10.98(dist=3834)	scaffold_11	12341	12341	A	G	hom	30
intergenic	gene_1390(dist=4479),gene_1392(dist=3827)	fgenesh1_pg.11_#_2(dist=4479),fgenesh1_kg.11_#_7_#_Locus5266v1rpkm10.98(dist=3827)	scaffold_11	12348	12348	G	A	hom	30
intergenic	gene_1390(dist=4489),gene_1392(dist=3817)	fgenesh1_pg.11_#_2(dist=4489),fgenesh1_kg.11_#_7_#_Locus5266v1rpkm10.98(dist=3817)	scaffold_11	12358	12358	A	G	hom	30
intergenic	gene_1390(dist=4514),gene_1392(dist=3792)	fgenesh1_pg.11_#_2(dist=4514),fgenesh1_kg.11_#_7_#_Locus5266v1rpkm10.98(dist=3792)	scaffold_11	12383	12383	C	T	hom	30
intergenic	gene_1390(dist=4516),gene_1392(dist=3790)	fgenesh1_pg.11_#_2(dist=4516),fgenesh1_kg.11_#_7_#_Locus5266v1rpkm10.98(dist=3790)	scaffold_11	12385	12385	T	C	hom	30
intergenic	gene_1390(dist=5026),gene_1392(dist=3280)	fgenesh1_pg.11_#_2(dist=5026),fgenesh1_kg.11_#_7_#_Locus5266v1rpkm10.98(dist=3280)	scaffold_11	12895	12895	C	G	hom	30
exonic	gene_1405	fgenesh1_pm.11_#_11	scaffold_11	44444	44444	A	G	hom	30
upstream	gene_1406	e_gw1.11.179.1	scaffold_11	49058	49058	C	A	hom	30
upstream	gene_1406	e_gw1.11.179.1	scaffold_11	49061	49061	G	T	hom	30
exonic	gene_1410	fgenesh1_kg.11_#_21_#_Locus3139v3rpkm0.00_PRE	scaffold_11	54107	54107	G	A	hom	30
downstream	gene_1418	fgenesh1_kg.11_#_36_#_Locus3237v1rpkm31.89	scaffold_11	75201	75201	G	A	hom	30
UTR3	gene_1425	fgenesh1_kg.11_#_44_#_Locus2527v1rpkm46.35	scaffold_11	94898	94898	T	C	hom	30
exonic	gene_1434	fgenesh1_pg.11_#_36	scaffold_11	118995	118995	T	G	hom	30
exonic	gene_1435	gm1.1153_g	scaffold_11	120014	120014	A	G	hom	30
exonic	gene_1443	estExt_fgenesh1_pg.C_110044	scaffold_11	136201	136201	A	G	hom	30
exonic	gene_1448	gw1.11.105.1	scaffold_11	154338	154338	T	C	hom	30
upstream;downstream	gene_1458;gene_1457	gm1.1173_g;estExt_Genewise1.C_110114	scaffold_11	171266	171266	C	G	hom	30
upstream;downstream	gene_1458;gene_1457	gm1.1173_g;estExt_Genewise1.C_110114	scaffold_11	171267	171267	A	T	hom	30
upstream;downstream	gene_1458;gene_1457	gm1.1173_g;estExt_Genewise1.C_110114	scaffold_11	171268	171268	G	T	hom	30
intergenic	gene_1490(dist=2551),gene_1493(dist=2475)	CE29319_30160(dist=2551),CE29399_492(dist=2475)	scaffold_11	252987	252987	C	A	hom	30
intergenic	gene_1490(dist=2560),gene_1493(dist=2466)	CE29319_30160(dist=2560),CE29399_492(dist=2466)	scaffold_11	252996	252996	G	A	hom	30
exonic	gene_1501	CE29606_5156	scaffold_11	265922	265922	C	T	hom	30
upstream	gene_1502	CE29207_27323	scaffold_11	268228	268228	T	C	hom	30
downstream	gene_7518	fgenesh1_kg.110_#_2_#_Locus2485v1rpkm47.29	scaffold_110	1187	1187	T	A	hom	30
upstream	gene_7519,gene_7520	fgenesh1_kg.110_#_3_#_Locus2143v1rpkm58.73,fgenesh1_pg.110_#_3	scaffold_110	6044	6044	G	A	hom	30
upstream	gene_7519,gene_7520	fgenesh1_kg.110_#_3_#_Locus2143v1rpkm58.73,fgenesh1_pg.110_#_3	scaffold_110	6144	6144	C	A	hom	30
exonic	gene_7531	estExt_fgenesh1_pm.C_1100012	scaffold_110	31336	31336	T	G	hom	30
UTR5	gene_7541	fgenesh1_kg.110_#_26_#_Locus5713v1rpkm8.56	scaffold_110	55158	55158	G	A	hom	30
downstream	gene_7542,gene_7543	e_gw1.110.43.1,estExt_Genewise1.C_1100061	scaffold_110	62788	62788	C	G	hom	30
upstream;downstream	gene_7547;gene_7548	fgenesh1_pg.110_#_27;CE30700_15	scaffold_110	71766	71766	C	A	hom	30
exonic	gene_7549	e_gw1.110.57.1	scaffold_110	74896	74896	A	G	hom	30
downstream	gene_7554,gene_7555	e_gw1.111.35.1,estExt_Genemark1.C_1110002	scaffold_111	6036	6036	G	T	hom	30
downstream	gene_7554,gene_7555	e_gw1.111.35.1,estExt_Genemark1.C_1110002	scaffold_111	6037	6037	A	T	hom	30
downstream	gene_7554,gene_7555	e_gw1.111.35.1,estExt_Genemark1.C_1110002	scaffold_111	6043	6043	C	T	hom	30
downstream	gene_7554,gene_7555	e_gw1.111.35.1,estExt_Genemark1.C_1110002	scaffold_111	6044	6044	A	T	hom	30
downstream	gene_7554,gene_7555	e_gw1.111.35.1,estExt_Genemark1.C_1110002	scaffold_111	6046	6046	C	T	hom	30
downstream	gene_7554,gene_7555	e_gw1.111.35.1,estExt_Genemark1.C_1110002	scaffold_111	6047	6047	G	T	hom	30
downstream	gene_7554,gene_7555	e_gw1.111.35.1,estExt_Genemark1.C_1110002	scaffold_111	6050	6050	C	T	hom	30
downstream	gene_7554,gene_7555	e_gw1.111.35.1,estExt_Genemark1.C_1110002	scaffold_111	6052	6052	C	T	hom	30
downstream	gene_7554,gene_7555	e_gw1.111.35.1,estExt_Genemark1.C_1110002	scaffold_111	6053	6053	G	T	hom	30
downstream	gene_7554,gene_7555	e_gw1.111.35.1,estExt_Genemark1.C_1110002	scaffold_111	6054	6054	G	T	hom	30
downstream	gene_7554,gene_7555	e_gw1.111.35.1,estExt_Genemark1.C_1110002	scaffold_111	6056	6056	C	T	hom	30
downstream	gene_7563	estExt_fgenesh1_pm.C_1110003	scaffold_111	19253	19253	T	C	hom	30
intronic	gene_7565	fgenesh1_pm.111_#_5	scaffold_111	25519	25519	A	C	hom	30
exonic	gene_7575	CE31347_43336	scaffold_111	48135	48135	T	G	hom	30
upstream;downstream	gene_7580;gene_7581	e_gw1.111.31.1;fgenesh1_kg.111_#_31_#_Locus2276v1rpkm53.85	scaffold_111	59209	59209	C	A	hom	30
exonic	gene_7605	fgenesh1_kg.112_#_16_#_Locus1913v1rpkm69.13	scaffold_112	31962	31962	T	C	hom	30
exonic	gene_7606	estExt_Genewise1Plus.C_1120033	scaffold_112	34425	34425	T	C	hom	30
downstream	gene_7608,gene_7609	fgenesh1_kg.112_#_18_#_Locus7051v1rpkm4.13,fgenesh1_kg.112_#_19_#_Locus8251v1rpkm2.47	scaffold_112	42794	42794	C	T	hom	30
exonic	gene_7614	fgenesh1_pg.112_#_20	scaffold_112	57556	57556	G	A	hom	30
intergenic	gene_7619(dist=1674),gene_7621(dist=3337)	fgenesh1_kg.113_#_2_#_Locus2834v1rpkm39.06(dist=1674),e_gw1.113.43.1(dist=3337)	scaffold_113	3659	3659	G	T	hom	30
intergenic	gene_7619(dist=2832),gene_7621(dist=2179)	fgenesh1_kg.113_#_2_#_Locus2834v1rpkm39.06(dist=2832),e_gw1.113.43.1(dist=2179)	scaffold_113	4817	4817	T	C	hom	30
intergenic	gene_7626(dist=8413),gene_7628(dist=37162)	fgenesh1_kg.113_#_10_#_Locus1315v1rpkm112.44(dist=8413),e_gw1.113.62.1(dist=37162)	scaffold_113	28631	28631	A	G	hom	30
intergenic	gene_7626(dist=19015),gene_7628(dist=26560)	fgenesh1_kg.113_#_10_#_Locus1315v1rpkm112.44(dist=19015),e_gw1.113.62.1(dist=26560)	scaffold_113	39233	39233	A	G	hom	30
intergenic	gene_7626(dist=21940),gene_7628(dist=23635)	fgenesh1_kg.113_#_10_#_Locus1315v1rpkm112.44(dist=21940),e_gw1.113.62.1(dist=23635)	scaffold_113	42158	42158	T	C	hom	30
intergenic	gene_7626(dist=29945),gene_7628(dist=15630)	fgenesh1_kg.113_#_10_#_Locus1315v1rpkm112.44(dist=29945),e_gw1.113.62.1(dist=15630)	scaffold_113	50163	50163	G	A	hom	30
intergenic	gene_7626(dist=36150),gene_7628(dist=9425)	fgenesh1_kg.113_#_10_#_Locus1315v1rpkm112.44(dist=36150),e_gw1.113.62.1(dist=9425)	scaffold_113	56368	56368	T	C	hom	30
intergenic	gene_7629(dist=2912),NONE(dist=NONE)	e_gw1.113.54.1(dist=2912),NONE(dist=NONE)	scaffold_113	71222	71222	T	C	hom	30
intergenic	gene_7629(dist=2920),NONE(dist=NONE)	e_gw1.113.54.1(dist=2920),NONE(dist=NONE)	scaffold_113	71230	71230	T	C	hom	30
intergenic	gene_7629(dist=2935),NONE(dist=NONE)	e_gw1.113.54.1(dist=2935),NONE(dist=NONE)	scaffold_113	71245	71245	T	C	hom	30
intergenic	gene_7629(dist=2948),NONE(dist=NONE)	e_gw1.113.54.1(dist=2948),NONE(dist=NONE)	scaffold_113	71258	71258	A	G	hom	30
intergenic	gene_7629(dist=2953),NONE(dist=NONE)	e_gw1.113.54.1(dist=2953),NONE(dist=NONE)	scaffold_113	71263	71263	C	T	hom	30
intergenic	gene_7629(dist=2981),NONE(dist=NONE)	e_gw1.113.54.1(dist=2981),NONE(dist=NONE)	scaffold_113	71291	71291	C	T	hom	30
exonic	gene_7630	CE32906_1469	scaffold_114	1185	1185	G	A	hom	30
upstream	gene_7631	gm1.6161_g	scaffold_114	4083	4083	C	A	hom	30
upstream;downstream	gene_7635;gene_7634	e_gw1.114.72.1;estExt_fgenesh1_pg.C_1140003	scaffold_114	9180	9180	G	A	hom	30
upstream;downstream	gene_7640;gene_7639	fgenesh1_kg.114_#_10_#_Locus602v2rpkm3.23_PRE;fgenesh1_kg.114_#_9_#_Locus6305v2rpkm3.23	scaffold_114	20013	20013	C	G	hom	30
upstream;downstream	gene_7640;gene_7639	fgenesh1_kg.114_#_10_#_Locus602v2rpkm3.23_PRE;fgenesh1_kg.114_#_9_#_Locus6305v2rpkm3.23	scaffold_114	20019	20019	C	G	hom	30
UTR5	gene_7640	fgenesh1_kg.114_#_10_#_Locus602v2rpkm3.23_PRE	scaffold_114	20024	20024	C	G	hom	30
UTR5	gene_7640	fgenesh1_kg.114_#_10_#_Locus602v2rpkm3.23_PRE	scaffold_114	20028	20028	C	G	hom	30
UTR5	gene_7640	fgenesh1_kg.114_#_10_#_Locus602v2rpkm3.23_PRE	scaffold_114	20038	20038	C	A	hom	30
upstream	gene_7643	fgenesh1_pg.114_#_12	scaffold_114	29134	29134	G	T	hom	30
exonic	gene_7648	gm1.6176_g	scaffold_114	39546	39546	T	C	hom	30
intergenic	gene_7666(dist=1379),gene_7667(dist=1092)	gm1.6190_g(dist=1379),gm1.6191_g(dist=1092)	scaffold_115	2783	2783	T	C	hom	30
intergenic	gene_7666(dist=1394),gene_7667(dist=1077)	gm1.6190_g(dist=1394),gm1.6191_g(dist=1077)	scaffold_115	2798	2798	T	C	hom	30
exonic	gene_7667	gm1.6191_g	scaffold_115	4298	4298	A	T	hom	30
exonic	gene_7675	CE34547_13	scaffold_115	18582	18582	T	C	hom	30
intergenic	gene_7675(dist=1760),gene_7676(dist=1041)	CE34547_13(dist=1760),e_gw1.115.18.1(dist=1041)	scaffold_115	20603	20603	A	G	hom	30
intronic	gene_7681	estExt_Genewise1Plus.C_1150029	scaffold_115	34910	34910	G	A	hom	30
exonic	gene_7683	fgenesh1_kg.115_#_8_#_Locus4636v1rpkm15.61	scaffold_115	41146	41146	G	A	hom	30
exonic	gene_7686	estExt_fgenesh1_pm.C_1150017	scaffold_115	46776	46776	A	G	hom	30
exonic	gene_7692	fgenesh1_pm.115_#_19	scaffold_115	57505	57505	A	G	hom	30
exonic	gene_7692	fgenesh1_pm.115_#_19	scaffold_115	57562	57562	C	G	hom	30
upstream;downstream	gene_7693;gene_7692	CE37945_9305;fgenesh1_pm.115_#_19	scaffold_115	58735	58735	T	C	hom	30
upstream;downstream	gene_7693;gene_7692	CE37945_9305;fgenesh1_pm.115_#_19	scaffold_115	59113	59113	T	C	hom	30
intronic	gene_7699	fgenesh1_kg.115_#_33_#_Locus5967v1rpkm7.46	scaffold_115	70316	70316	T	C	hom	30
intronic	gene_7709	fgenesh1_kg.116_#_12_#_Locus7349v1rpkm3.57	scaffold_116	16398	16398	G	T	hom	30
intergenic	gene_7711(dist=1220),gene_7712(dist=3463)	estExt_fgenesh1_pm.C_1160008(dist=1220),fgenesh1_kg.116_#_18_#_Locus3554v1rpkm27.15(dist=3463)	scaffold_116	24466	24466	C	T	hom	30
upstream	gene_7712	fgenesh1_kg.116_#_18_#_Locus3554v1rpkm27.15	scaffold_116	30296	30296	A	G	hom	30
upstream	gene_7730	fgenesh1_kg.116_#_34_#_Locus14922v1rpkm0.42	scaffold_116	65952	65952	G	T	hom	30
downstream	gene_7734	fgenesh1_kg.117_#_1_#_Locus3683v1rpkm25.44	scaffold_117	25	25	C	T	hom	30
downstream	gene_7734	fgenesh1_kg.117_#_1_#_Locus3683v1rpkm25.44	scaffold_117	26	26	C	A	hom	30
upstream	gene_7739,gene_7740	estExt_Genewise1Plus.C_1170010,fgenesh1_kg.117_#_5_#_Locus177v2rpkm43.55_PRE	scaffold_117	9521	9521	T	G	hom	30
exonic	gene_7740	estExt_Genewise1Plus.C_1170010	scaffold_117	12496	12496	C	T	hom	30
exonic	gene_7746	e_gw1.117.19.1	scaffold_117	21776	21776	C	A	hom	30
upstream;downstream	gene_7785;gene_7784	CE41425_60;fgenesh1_kg.118_#_11_#_Locus9538v1rpkm1.65	scaffold_118	21637	21637	G	T	hom	30
upstream	gene_7802	fgenesh1_pm.118_#_12	scaffold_118	48963	48963	G	T	hom	30
exonic	gene_7804	fgenesh1_kg.118_#_25_#_Locus2321v2rpkm12.31	scaffold_118	51774	51774	G	A	hom	30
intergenic	gene_7810(dist=3236),NONE(dist=NONE)	CE41941_710(dist=3236),NONE(dist=NONE)	scaffold_118	70277	70277	C	T	hom	30
exonic	gene_7833	fgenesh1_kg.119_#_31_#_Locus7716v5rpkm0.37	scaffold_119	57958	57958	C	T	hom	30
upstream	gene_7838,gene_7839	e_gw1.119.50.1,estExt_fgenesh1_pg.C_1190022	scaffold_119	64293	64293	C	T	hom	30
downstream	gene_7839	e_gw1.119.50.1	scaffold_119	70253	70253	A	G	hom	30
downstream	gene_1503,gene_1504	estExt_Genewise1.C_120004,fgenesh1_kg.12_#_1_#_Locus3882v1rpkm23.23	scaffold_12	4066	4066	G	A	hom	30
UTR3	gene_1514	fgenesh1_kg.12_#_13_#_Locus287v1rpkm644.06	scaffold_12	25584	25584	C	G	hom	30
exonic	gene_1517	estExt_Genemark1.C_120013	scaffold_12	31932	31932	C	T	hom	30
exonic	gene_1517	estExt_Genemark1.C_120013	scaffold_12	32101	32101	G	A	hom	30
exonic	gene_1517	estExt_Genemark1.C_120013	scaffold_12	32360	32360	C	T	hom	30
exonic	gene_1518	fgenesh1_kg.12_#_19_#_Locus1856v1rpkm72.00	scaffold_12	33980	33980	C	A	hom	30
exonic	gene_1519	gm1.1221_g	scaffold_12	38729	38729	A	G	hom	30
downstream	gene_1522	CE44204_8767	scaffold_12	50876	50876	T	C	hom	30
downstream	gene_1526	gw1.12.13.1	scaffold_12	55022	55022	T	C	hom	30
downstream	gene_1526	gw1.12.13.1	scaffold_12	55165	55165	A	G	hom	30
downstream	gene_1526	gw1.12.13.1	scaffold_12	55173	55173	C	G	hom	30
downstream	gene_1526	gw1.12.13.1	scaffold_12	55186	55186	C	T	hom	30
downstream	gene_1526	gw1.12.13.1	scaffold_12	55188	55188	A	C	hom	30
exonic	gene_1526	gw1.12.13.1	scaffold_12	56097	56097	T	G	hom	30
upstream;downstream	gene_1531;gene_1529,gene_1530	MIX2539_14_58;MIX2535_36_64,MIX2537_14_73	scaffold_12	61526	61526	A	G	hom	30
upstream;downstream	gene_1531;gene_1529,gene_1530	MIX2539_14_58;MIX2535_36_64,MIX2537_14_73	scaffold_12	61531	61531	C	T	hom	30
upstream;downstream	gene_1531;gene_1529,gene_1530	MIX2539_14_58;MIX2535_36_64,MIX2537_14_73	scaffold_12	61555	61555	C	T	hom	30
upstream;downstream	gene_1531;gene_1529,gene_1530	MIX2539_14_58;MIX2535_36_64,MIX2537_14_73	scaffold_12	61563	61563	C	T	hom	30
upstream;downstream	gene_1531;gene_1530	MIX2539_14_58;MIX2537_14_73	scaffold_12	61565	61565	T	C	hom	30
upstream;downstream	gene_1531;gene_1530	MIX2539_14_58;MIX2537_14_73	scaffold_12	61573	61573	C	T	hom	30
exonic	gene_1531	MIX2539_14_58	scaffold_12	62178	62178	C	A	hom	30
exonic	gene_1532	estExt_fgenesh1_pm.C_120015	scaffold_12	63154	63154	C	T	hom	30
exonic	gene_1534	fgenesh1_kg.12_#_34_#_Locus3575v2rpkm21.94	scaffold_12	68859	68859	A	C	hom	30
downstream	gene_1536	fgenesh1_kg.12_#_36_#_Locus3575v4rpkm1.45_PRE	scaffold_12	72161	72161	A	T	hom	30
exonic	gene_1539	fgenesh1_kg.12_#_39_#_Locus4977v1rpkm12.82	scaffold_12	78090	78090	A	G	hom	30
exonic	gene_1562	gm1.1257_g	scaffold_12	135480	135480	T	C	hom	30
exonic	gene_1573	fgenesh1_pm.12_#_44	scaffold_12	162308	162308	T	A	hom	30
exonic	gene_1580	gm1.1270_g	scaffold_12	180209	180209	G	C	hom	30
UTR5	gene_1584	fgenesh1_kg.12_#_77_#_Locus1907v1rpkm69.36	scaffold_12	187626	187626	C	A	hom	30
exonic	gene_1618	fgenesh1_kg.12_#_111_#_Locus1091v1rpkm141.56	scaffold_12	264954	264954	T	A	hom	30
downstream	gene_1618	fgenesh1_kg.12_#_111_#_Locus1091v1rpkm141.56	scaffold_12	265797	265797	A	G	hom	30
intronic	gene_7840	MIX2721_1176_38	scaffold_120	1638	1638	G	A	hom	30
downstream	gene_7842	estExt_Genewise1.C_1200006	scaffold_120	8043	8043	T	C	hom	30
upstream;downstream	gene_7847;gene_7848	e_gw1.120.18.1;estExt_Genemark1.C_1200008	scaffold_120	20998	20998	A	T	hom	30
upstream;downstream	gene_7847;gene_7848	e_gw1.120.18.1;estExt_Genemark1.C_1200008	scaffold_120	21001	21001	A	C	hom	30
upstream;downstream	gene_7847;gene_7848	e_gw1.120.18.1;estExt_Genemark1.C_1200008	scaffold_120	21005	21005	A	C	hom	30
upstream;downstream	gene_7847;gene_7848	e_gw1.120.18.1;estExt_Genemark1.C_1200008	scaffold_120	21011	21011	G	T	hom	30
upstream;downstream	gene_7851;gene_7854	fgenesh1_pm.120_#_7;fgenesh1_kg.120_#_13_#_Locus859v2rpkm133.21	scaffold_120	35300	35300	G	T	hom	30
exonic	gene_7858	estExt_Genewise1Plus.C_1200037	scaffold_120	46549	46549	T	C	hom	30
upstream	gene_7866	fgenesh1_kg.120_#_31_#_Locus3651v1rpkm25.82	scaffold_120	57964	57964	G	A	hom	30
downstream	gene_7869	fgenesh1_pg.120_#_21	scaffold_120	63346	63346	C	T	hom	30
downstream	gene_7869	fgenesh1_pg.120_#_21	scaffold_120	63408	63408	T	C	hom	30
downstream	gene_7869	fgenesh1_pg.120_#_21	scaffold_120	63416	63416	A	G	hom	30
downstream	gene_7869	fgenesh1_pg.120_#_21	scaffold_120	63430	63430	G	A	hom	30
downstream	gene_7869	fgenesh1_pg.120_#_21	scaffold_120	63446	63446	C	T	hom	30
downstream	gene_7869	fgenesh1_pg.120_#_21	scaffold_120	63453	63453	C	A	hom	30
downstream	gene_7869	fgenesh1_pg.120_#_21	scaffold_120	63614	63614	A	G	hom	30
downstream	gene_7869	fgenesh1_pg.120_#_21	scaffold_120	63625	63625	T	C	hom	30
intergenic	NONE(dist=NONE),gene_7873(dist=1371)	NONE(dist=NONE),fgenesh1_kg.121_#_1_#_Locus2200v1rpkm56.87(dist=1371)	scaffold_121	250	250	A	G	hom	30
UTR5	gene_7875	fgenesh1_kg.121_#_2_#_Locus368v1rpkm492.16	scaffold_121	3719	3719	C	T	hom	30
exonic	gene_7885	e_gw1.121.41.1	scaffold_121	28034	28034	T	G	hom	30
exonic	gene_7890	e_gw1.121.9.1	scaffold_121	44782	44782	A	G	hom	30
exonic	gene_7897	fgenesh1_kg.121_#_24_#_Locus12540v1rpkm0.82	scaffold_121	61470	61470	A	C	hom	30
exonic	gene_7897	fgenesh1_kg.121_#_24_#_Locus12540v1rpkm0.82	scaffold_121	61489	61489	A	G	hom	30
exonic	gene_7897	fgenesh1_kg.121_#_24_#_Locus12540v1rpkm0.82	scaffold_121	61585	61585	C	T	hom	30
exonic	gene_7897	fgenesh1_kg.121_#_24_#_Locus12540v1rpkm0.82	scaffold_121	61588	61588	A	G	hom	30
exonic	gene_7897	fgenesh1_kg.121_#_24_#_Locus12540v1rpkm0.82	scaffold_121	61647	61647	A	G	hom	30
exonic	gene_7897	fgenesh1_kg.121_#_24_#_Locus12540v1rpkm0.82	scaffold_121	61652	61652	C	T	hom	30
exonic	gene_7897	fgenesh1_kg.121_#_24_#_Locus12540v1rpkm0.82	scaffold_121	61698	61698	A	G	hom	30
exonic	gene_7897	fgenesh1_kg.121_#_24_#_Locus12540v1rpkm0.82	scaffold_121	61704	61704	A	G	hom	30
UTR3	gene_7905	fgenesh1_kg.122_#_1_#_Locus5531v1rpkm9.55	scaffold_122	4005	4005	A	C	hom	30
intronic	gene_7913	CE50578_38	scaffold_122	19595	19595	G	T	hom	30
exonic	gene_7919	e_gw1.122.30.1	scaffold_122	31177	31177	T	C	hom	30
exonic	gene_7919	e_gw1.122.30.1	scaffold_122	31272	31272	G	A	hom	30
exonic	gene_7934	MIX2944_22_46	scaffold_122	66630	66630	A	G	hom	30
UTR3	gene_7938	fgenesh1_kg.123_#_6_#_Locus14626v5rpkm0.28	scaffold_123	9812	9812	T	C	hom	30
upstream	gene_7959	gm1.6410_g	scaffold_123	52386	52386	C	T	hom	30
UTR3	gene_7961	fgenesh1_kg.123_#_30_#_Locus702v1rpkm235.82	scaffold_123	55426	55426	T	C	hom	30
UTR5	gene_7961	fgenesh1_kg.123_#_30_#_Locus702v1rpkm235.82	scaffold_123	56463	56463	A	G	hom	30
intergenic	gene_7963(dist=2244),gene_7964(dist=3265)	fgenesh1_kg.123_#_31_#_Locus5561v1rpkm9.38(dist=2244),fgenesh1_pg.123_#_23(dist=3265)	scaffold_123	60903	60903	C	T	hom	30
intergenic	gene_7963(dist=2245),gene_7964(dist=3264)	fgenesh1_kg.123_#_31_#_Locus5561v1rpkm9.38(dist=2245),fgenesh1_pg.123_#_23(dist=3264)	scaffold_123	60904	60904	G	T	hom	30
intergenic	gene_7963(dist=2251),gene_7964(dist=3258)	fgenesh1_kg.123_#_31_#_Locus5561v1rpkm9.38(dist=2251),fgenesh1_pg.123_#_23(dist=3258)	scaffold_123	60910	60910	C	T	hom	30
intergenic	gene_7963(dist=2254),gene_7964(dist=3255)	fgenesh1_kg.123_#_31_#_Locus5561v1rpkm9.38(dist=2254),fgenesh1_pg.123_#_23(dist=3255)	scaffold_123	60913	60913	A	G	hom	30
intergenic	gene_7963(dist=2263),gene_7964(dist=3246)	fgenesh1_kg.123_#_31_#_Locus5561v1rpkm9.38(dist=2263),fgenesh1_pg.123_#_23(dist=3246)	scaffold_123	60922	60922	A	G	hom	30
intergenic	gene_7963(dist=2325),gene_7964(dist=3184)	fgenesh1_kg.123_#_31_#_Locus5561v1rpkm9.38(dist=2325),fgenesh1_pg.123_#_23(dist=3184)	scaffold_123	60984	60984	A	G	hom	30
upstream;downstream	gene_7967;gene_7968	estExt_Genemark1.C_1240001;estExt_fgenesh1_pg.C_1240002	scaffold_124	6362	6362	A	T	hom	30
upstream	gene_7976,gene_7977	fgenesh1_kg.124_#_9_#_Locus915v1rpkm174.26,fgenesh1_pm.124_#_8	scaffold_124	23115	23115	T	A	hom	30
upstream	gene_7976,gene_7977	fgenesh1_kg.124_#_9_#_Locus915v1rpkm174.26,fgenesh1_pm.124_#_8	scaffold_124	23501	23501	T	C	hom	30
upstream	gene_7976,gene_7977	fgenesh1_kg.124_#_9_#_Locus915v1rpkm174.26,fgenesh1_pm.124_#_8	scaffold_124	23502	23502	T	A	hom	30
exonic	gene_7978	estExt_Genewise1Plus.C_1240030	scaffold_124	28002	28002	G	A	hom	30
exonic	gene_7982	gw1.124.51.1	scaffold_124	35466	35466	T	G	hom	30
exonic	gene_7987	CE53561_4448	scaffold_124	43080	43080	G	A	hom	30
exonic	gene_7996	CE53724_1401	scaffold_124	57800	57800	C	T	hom	30
exonic	gene_7997	CE53701_3708	scaffold_124	58646	58646	T	G	hom	30
intergenic	gene_8000(dist=1633),NONE(dist=NONE)	CE53808_1032(dist=1633),NONE(dist=NONE)	scaffold_124	65874	65874	G	A	hom	30
intergenic	gene_8000(dist=2556),NONE(dist=NONE)	CE53808_1032(dist=2556),NONE(dist=NONE)	scaffold_124	66797	66797	C	A	hom	30
UTR5	gene_8027	CE54685_333	scaffold_126	111	111	C	A	hom	30
exonic	gene_8029	CE54708_11672	scaffold_126	4856	4856	T	C	hom	30
exonic	gene_8036	fgenesh1_pm.126_#_6	scaffold_126	26148	26148	C	T	hom	30
exonic	gene_8048	fgenesh1_kg.126_#_22_#_Locus5047v4rpkm1.04_PRE	scaffold_126	55117	55117	C	T	hom	30
exonic	gene_8049	CE55089_16074	scaffold_126	57599	57599	T	C	hom	30
downstream	gene_8050	gw1.126.14.1	scaffold_126	63770	63770	A	G	hom	30
exonic	gene_8057	fgenesh1_kg.127_#_4_#_Locus5983v1rpkm7.42	scaffold_127	15017	15017	G	A	hom	30
exonic	gene_8059	fgenesh1_pm.127_#_6	scaffold_127	19459	19459	C	T	hom	30
exonic	gene_8065	fgenesh1_pm.127_#_10	scaffold_127	30321	30321	G	A	hom	30
UTR5	gene_8069	fgenesh1_kg.127_#_14_#_Locus1639v1rpkm85.95	scaffold_127	38079	38079	G	A	hom	30
exonic	gene_8070	estExt_fgenesh1_pg.C_1270015	scaffold_127	41041	41041	G	A	hom	30
upstream	gene_8080	estExt_Genewise1Plus.C_1270061	scaffold_127	65363	65363	C	A	hom	30
exonic	gene_8083	estExt_fgenesh1_pm.C_1280002	scaffold_128	5233	5233	G	T	hom	30
exonic	gene_8089	fgenesh1_pm.128_#_8	scaffold_128	21733	21733	G	C	hom	30
exonic	gene_8099	e_gw1.128.38.1	scaffold_128	44993	44993	G	A	hom	30
exonic	gene_8102	MIX3162_5_32	scaffold_128	53456	53456	G	A	hom	30
intronic	gene_8110,gene_8111	fgenesh1_kg.129_#_4_#_Locus467v1rpkm386.99,fgenesh1_pg.129_#_1	scaffold_129	3408	3408	G	T	hom	30
exonic	gene_8127	CE57641_23358	scaffold_129	39454	39454	C	T	hom	30
intergenic	gene_8127(dist=1341),gene_8129(dist=2661)	CE57641_23358(dist=1341),e_gw1.129.61.1(dist=2661)	scaffold_129	42585	42585	T	A	hom	30
intronic	gene_8133	MIX3190_459_51	scaffold_129	52432	52432	C	T	hom	30
exonic	gene_1619	estExt_Genewise1Plus.C_130002	scaffold_13	2398	2398	G	A	hom	30
exonic	gene_1630	CE58255_1623	scaffold_13	28295	28295	C	A	hom	30
downstream	gene_1641,gene_1642	CE58498_1527,gm1.1315_g	scaffold_13	55665	55665	A	G	hom	30
downstream	gene_1641,gene_1642	CE58498_1527,gm1.1315_g	scaffold_13	55682	55682	C	T	hom	30
upstream;downstream	gene_1650;gene_1651	fgenesh1_kg.13_#_33_#_Locus647v1rpkm262.78;fgenesh1_kg.13_#_34_#_Locus11794v2rpkm0.71	scaffold_13	73072	73072	A	G	hom	30
exonic	gene_1656	fgenesh1_kg.13_#_43_#_Locus2935v1rpkm37.23	scaffold_13	82942	82942	G	A	hom	30
upstream	gene_1656,gene_1658	fgenesh1_kg.13_#_43_#_Locus2935v1rpkm37.23,fgenesh1_pm.13_#_26	scaffold_13	84838	84838	T	G	hom	30
exonic	gene_1658	fgenesh1_pm.13_#_26	scaffold_13	85865	85865	C	T	hom	30
downstream	gene_1658,gene_1659	fgenesh1_pm.13_#_26,gm1.1331_g	scaffold_13	92150	92150	C	G	hom	30
exonic	gene_1663	fgenesh1_kg.13_#_55_#_Locus958v1rpkm165.93	scaffold_13	103392	103392	C	T	hom	30
exonic	gene_1664	gm1.1336_g	scaffold_13	108484	108484	A	G	hom	30
exonic	gene_1668	gm1.1339_g	scaffold_13	115021	115021	C	T	hom	30
intergenic	gene_1671(dist=1484),gene_1672(dist=1287)	fgenesh1_kg.13_#_68_#_Locus864v1rpkm187.50(dist=1484),e_gw1.13.103.1(dist=1287)	scaffold_13	122952	122952	A	G	hom	30
intergenic	gene_1671(dist=1493),gene_1672(dist=1278)	fgenesh1_kg.13_#_68_#_Locus864v1rpkm187.50(dist=1493),e_gw1.13.103.1(dist=1278)	scaffold_13	122961	122961	A	T	hom	30
intergenic	gene_1672(dist=1052),gene_1673(dist=1476)	e_gw1.13.103.1(dist=1052),gm1.1344_g(dist=1476)	scaffold_13	127321	127321	G	A	hom	30
upstream	gene_1673,gene_1674	gm1.1344_g,gw1.13.28.1	scaffold_13	130280	130280	G	A	hom	30
intronic	gene_1678	fgenesh1_kg.13_#_75_#_Locus2720v1rpkm41.41	scaffold_13	138926	138926	A	G	hom	30
intronic	gene_1678	fgenesh1_kg.13_#_75_#_Locus2720v1rpkm41.41	scaffold_13	138927	138927	T	G	hom	30
exonic	gene_1688	fgenesh1_kg.13_#_93_#_Locus1968v1rpkm66.58	scaffold_13	163132	163132	C	T	hom	30
intronic	gene_1689	fgenesh1_pm.13_#_51	scaffold_13	165336	165336	A	C	hom	30
intronic	gene_1689	fgenesh1_pm.13_#_51	scaffold_13	165353	165353	A	C	hom	30
intronic	gene_1689	fgenesh1_pm.13_#_51	scaffold_13	165389	165389	T	C	hom	30
exonic	gene_1696	CE61257_15749	scaffold_13	183266	183266	A	G	hom	30
downstream	gene_1704	e_gw1.13.170.1	scaffold_13	198595	198595	C	T	hom	30
intronic	gene_1704	e_gw1.13.170.1	scaffold_13	200513	200513	C	G	hom	30
exonic	gene_1709	fgenesh1_kg.13_#_116_#_Locus1910v1rpkm69.22	scaffold_13	219483	219483	G	C	hom	30
exonic	gene_1709	fgenesh1_kg.13_#_116_#_Locus1910v1rpkm69.22	scaffold_13	219486	219486	G	C	hom	30
exonic	gene_1709	fgenesh1_kg.13_#_116_#_Locus1910v1rpkm69.22	scaffold_13	219488	219488	G	C	hom	30
exonic	gene_1709	fgenesh1_kg.13_#_116_#_Locus1910v1rpkm69.22	scaffold_13	219489	219489	A	C	hom	30
exonic	gene_1709	fgenesh1_kg.13_#_116_#_Locus1910v1rpkm69.22	scaffold_13	219490	219490	T	C	hom	30
exonic	gene_1709	fgenesh1_kg.13_#_116_#_Locus1910v1rpkm69.22	scaffold_13	219491	219491	G	C	hom	30
exonic	gene_1709	fgenesh1_kg.13_#_116_#_Locus1910v1rpkm69.22	scaffold_13	219492	219492	A	C	hom	30
exonic	gene_1709	fgenesh1_kg.13_#_116_#_Locus1910v1rpkm69.22	scaffold_13	219494	219494	G	C	hom	30
exonic	gene_1709	fgenesh1_kg.13_#_116_#_Locus1910v1rpkm69.22	scaffold_13	219495	219495	A	C	hom	30
exonic	gene_1709	fgenesh1_kg.13_#_116_#_Locus1910v1rpkm69.22	scaffold_13	219496	219496	T	C	hom	30
exonic	gene_1709	fgenesh1_kg.13_#_116_#_Locus1910v1rpkm69.22	scaffold_13	219497	219497	G	C	hom	30
exonic	gene_1709	fgenesh1_kg.13_#_116_#_Locus1910v1rpkm69.22	scaffold_13	219498	219498	A	C	hom	30
exonic	gene_1709	fgenesh1_kg.13_#_116_#_Locus1910v1rpkm69.22	scaffold_13	219499	219499	A	C	hom	30
exonic	gene_1709	fgenesh1_kg.13_#_116_#_Locus1910v1rpkm69.22	scaffold_13	219501	219501	G	C	hom	30
exonic	gene_1709	fgenesh1_kg.13_#_116_#_Locus1910v1rpkm69.22	scaffold_13	219502	219502	G	C	hom	30
exonic	gene_1709	fgenesh1_kg.13_#_116_#_Locus1910v1rpkm69.22	scaffold_13	219505	219505	G	C	hom	30
exonic	gene_1709	fgenesh1_kg.13_#_116_#_Locus1910v1rpkm69.22	scaffold_13	219506	219506	A	C	hom	30
exonic	gene_1709	fgenesh1_kg.13_#_116_#_Locus1910v1rpkm69.22	scaffold_13	219507	219507	T	C	hom	30
exonic	gene_1709	fgenesh1_kg.13_#_116_#_Locus1910v1rpkm69.22	scaffold_13	219508	219508	A	C	hom	30
exonic	gene_1709	fgenesh1_kg.13_#_116_#_Locus1910v1rpkm69.22	scaffold_13	219509	219509	T	C	hom	30
exonic	gene_1709	fgenesh1_kg.13_#_116_#_Locus1910v1rpkm69.22	scaffold_13	219511	219511	G	C	hom	30
exonic	gene_1709	fgenesh1_kg.13_#_116_#_Locus1910v1rpkm69.22	scaffold_13	219512	219512	A	C	hom	30
exonic	gene_1709	fgenesh1_kg.13_#_116_#_Locus1910v1rpkm69.22	scaffold_13	219514	219514	G	C	hom	30
exonic	gene_1709	fgenesh1_kg.13_#_116_#_Locus1910v1rpkm69.22	scaffold_13	219515	219515	A	C	hom	30
exonic	gene_1709	fgenesh1_kg.13_#_116_#_Locus1910v1rpkm69.22	scaffold_13	219516	219516	A	C	hom	30
exonic	gene_1709	fgenesh1_kg.13_#_116_#_Locus1910v1rpkm69.22	scaffold_13	219517	219517	A	C	hom	30
exonic	gene_1709	fgenesh1_kg.13_#_116_#_Locus1910v1rpkm69.22	scaffold_13	219520	219520	G	C	hom	30
exonic	gene_1709	fgenesh1_kg.13_#_116_#_Locus1910v1rpkm69.22	scaffold_13	219521	219521	G	C	hom	30
exonic	gene_1709	fgenesh1_kg.13_#_116_#_Locus1910v1rpkm69.22	scaffold_13	219522	219522	A	C	hom	30
exonic	gene_1709	fgenesh1_kg.13_#_116_#_Locus1910v1rpkm69.22	scaffold_13	219523	219523	A	C	hom	30
UTR5	gene_1709	fgenesh1_kg.13_#_116_#_Locus1910v1rpkm69.22	scaffold_13	219536	219536	A	C	hom	30
UTR5	gene_1709	fgenesh1_kg.13_#_116_#_Locus1910v1rpkm69.22	scaffold_13	219537	219537	G	C	hom	30
UTR5	gene_1709	fgenesh1_kg.13_#_116_#_Locus1910v1rpkm69.22	scaffold_13	219539	219539	G	C	hom	30
UTR5	gene_1709	fgenesh1_kg.13_#_116_#_Locus1910v1rpkm69.22	scaffold_13	219540	219540	A	C	hom	30
UTR5	gene_1709	fgenesh1_kg.13_#_116_#_Locus1910v1rpkm69.22	scaffold_13	219541	219541	T	C	hom	30
UTR5	gene_1709	fgenesh1_kg.13_#_116_#_Locus1910v1rpkm69.22	scaffold_13	219542	219542	A	C	hom	30
UTR5	gene_1709	fgenesh1_kg.13_#_116_#_Locus1910v1rpkm69.22	scaffold_13	219543	219543	T	C	hom	30
UTR5	gene_1709	fgenesh1_kg.13_#_116_#_Locus1910v1rpkm69.22	scaffold_13	219544	219544	T	C	hom	30
UTR5	gene_1709	fgenesh1_kg.13_#_116_#_Locus1910v1rpkm69.22	scaffold_13	219545	219545	A	C	hom	30
UTR5	gene_1709	fgenesh1_kg.13_#_116_#_Locus1910v1rpkm69.22	scaffold_13	219571	219571	G	C	hom	30
UTR5	gene_1709	fgenesh1_kg.13_#_116_#_Locus1910v1rpkm69.22	scaffold_13	219572	219572	G	C	hom	30
UTR5	gene_1709	fgenesh1_kg.13_#_116_#_Locus1910v1rpkm69.22	scaffold_13	219573	219573	G	C	hom	30
UTR5	gene_1709	fgenesh1_kg.13_#_116_#_Locus1910v1rpkm69.22	scaffold_13	219574	219574	G	C	hom	30
UTR5	gene_1709	fgenesh1_kg.13_#_116_#_Locus1910v1rpkm69.22	scaffold_13	219575	219575	G	C	hom	30
UTR5	gene_1709	fgenesh1_kg.13_#_116_#_Locus1910v1rpkm69.22	scaffold_13	219576	219576	G	C	hom	30
upstream;downstream	gene_1709;gene_1710	fgenesh1_kg.13_#_116_#_Locus1910v1rpkm69.22;fgenesh1_kg.13_#_117_#_Locus4909v1rpkm13.34	scaffold_13	219578	219578	G	C	hom	30
upstream;downstream	gene_1709;gene_1710	fgenesh1_kg.13_#_116_#_Locus1910v1rpkm69.22;fgenesh1_kg.13_#_117_#_Locus4909v1rpkm13.34	scaffold_13	219580	219580	A	C	hom	30
upstream;downstream	gene_1709;gene_1710	fgenesh1_kg.13_#_116_#_Locus1910v1rpkm69.22;fgenesh1_kg.13_#_117_#_Locus4909v1rpkm13.34	scaffold_13	219588	219588	T	G	hom	30
upstream;downstream	gene_1709;gene_1710	fgenesh1_kg.13_#_116_#_Locus1910v1rpkm69.22;fgenesh1_kg.13_#_117_#_Locus4909v1rpkm13.34	scaffold_13	219638	219638	T	G	hom	30
intronic	gene_1716	e_gw1.13.32.1	scaffold_13	237058	237058	G	A	hom	30
intronic	gene_8140	e_gw1.130.3.1	scaffold_130	3274	3274	C	A	hom	30
upstream	gene_8141	CE63124_538	scaffold_130	6098	6098	T	C	hom	30
exonic	gene_8145	fgenesh1_kg.130_#_9_#_Locus5015v1rpkm12.55	scaffold_130	15167	15167	G	A	hom	30
exonic	gene_8153	fgenesh1_kg.130_#_15_#_Locus910v1rpkm174.95	scaffold_130	35648	35648	C	T	hom	30
UTR5	gene_8154	CE64625_5743	scaffold_130	38059	38059	G	T	hom	30
exonic	gene_8156	e_gw1.130.12.1	scaffold_130	42638	42638	A	C	hom	30
exonic	gene_8156	e_gw1.130.12.1	scaffold_130	42803	42803	C	A	hom	30
exonic	gene_8157	fgenesh1_pg.130_#_14	scaffold_130	45638	45638	G	A	hom	30
intronic	gene_8157	fgenesh1_pg.130_#_14	scaffold_130	46327	46327	A	C	hom	30
exonic	gene_8163	estExt_fgenesh1_pg.C_1310001	scaffold_131	2772	2772	C	T	hom	30
intronic	gene_8173	estExt_Genewise1.C_1310029	scaffold_131	28470	28470	G	A	hom	30
upstream;downstream	gene_8174;gene_8173	estExt_fgenesh1_pm.C_1310010;estExt_Genewise1.C_1310029	scaffold_131	30693	30693	G	T	hom	30
intronic	gene_8174	estExt_fgenesh1_pm.C_1310010	scaffold_131	32935	32935	T	C	hom	30
downstream	gene_8179	estExt_fgenesh1_pm.C_1310013	scaffold_131	43341	43341	C	T	hom	30
downstream	gene_8182	fgenesh1_kg.131_#_15_#_Locus7650v1rpkm3.10	scaffold_131	49112	49112	C	T	hom	30
downstream	gene_8182	fgenesh1_kg.131_#_15_#_Locus7650v1rpkm3.10	scaffold_131	49139	49139	A	G	hom	30
downstream	gene_8182	fgenesh1_kg.131_#_15_#_Locus7650v1rpkm3.10	scaffold_131	49141	49141	G	T	hom	30
downstream	gene_8182	fgenesh1_kg.131_#_15_#_Locus7650v1rpkm3.10	scaffold_131	49195	49195	T	C	hom	30
exonic	gene_8192	estExt_Genewise1.C_1320016	scaffold_132	11257	11257	G	A	hom	30
exonic	gene_8209	fgenesh1_pm.132_#_15	scaffold_132	43781	43781	G	A	hom	30
exonic	gene_8212	gm1.6622_g	scaffold_132	54936	54936	G	A	hom	30
upstream	gene_8217	gw1.133.42.1	scaffold_133	2995	2995	C	T	hom	30
exonic	gene_8217	gw1.133.42.1	scaffold_133	5434	5434	G	T	hom	30
exonic	gene_8222	fgenesh1_kg.133_#_8_#_Locus441v1rpkm416.60	scaffold_133	15727	15727	T	C	hom	30
upstream	gene_8225	fgenesh1_kg.133_#_12_#_Locus1265v1rpkm118.36	scaffold_133	25627	25627	G	T	hom	30
intronic	gene_8226	estExt_fgenesh1_pg.C_1330011	scaffold_133	31143	31143	C	T	hom	30
exonic	gene_8226	estExt_fgenesh1_pg.C_1330011	scaffold_133	31480	31480	C	T	hom	30
exonic	gene_8238	CE67527_6442	scaffold_133	54204	54204	C	A	hom	30
intronic	gene_8239	estExt_fgenesh1_pg.C_1330019	scaffold_133	56919	56919	A	T	hom	30
intronic	gene_8239	estExt_fgenesh1_pg.C_1330019	scaffold_133	56922	56922	A	C	hom	30
intergenic	NONE(dist=NONE),gene_8242(dist=2540)	NONE(dist=NONE),CE68131_3301(dist=2540)	scaffold_134	166	166	C	A	hom	30
exonic	gene_8242	CE68131_3301	scaffold_134	5254	5254	G	C	hom	30
downstream	gene_8258	e_gw1.134.9.1	scaffold_134	51621	51621	T	G	hom	30
intergenic	gene_8265(dist=2235),gene_8266(dist=1428)	e_gw1.135.2.1(dist=2235),CE69175_899(dist=1428)	scaffold_135	8792	8792	C	T	hom	30
upstream	gene_8266	CE69175_899	scaffold_135	9275	9275	T	C	hom	30
upstream	gene_8269	estExt_Genemark1.C_1350003	scaffold_135	18266	18266	C	A	hom	30
exonic	gene_8272	estExt_Genewise1.C_1350015	scaffold_135	29694	29694	C	G	hom	30
intronic	gene_8275	estExt_fgenesh1_pm.C_1350008	scaffold_135	38059	38059	A	G	hom	30
downstream	gene_8277	e_gw1.135.36.1	scaffold_135	46946	46946	A	G	hom	30
exonic	gene_8278	e_gw1.135.1.1	scaffold_135	51345	51345	G	A	hom	30
intergenic	gene_8284(dist=1028),gene_8285(dist=15405)	fgenesh1_kg.136_#_3_#_Locus5564v1rpkm9.36(dist=1028),fgenesh1_pm.136_#_3(dist=15405)	scaffold_136	8678	8678	C	T	hom	30
intergenic	gene_8284(dist=7366),gene_8285(dist=9067)	fgenesh1_kg.136_#_3_#_Locus5564v1rpkm9.36(dist=7366),fgenesh1_pm.136_#_3(dist=9067)	scaffold_136	15016	15016	C	T	hom	30
intergenic	gene_8286(dist=2381),NONE(dist=NONE)	e_gw1.136.45.1(dist=2381),NONE(dist=NONE)	scaffold_136	29317	29317	A	G	hom	30
intergenic	gene_8286(dist=2384),NONE(dist=NONE)	e_gw1.136.45.1(dist=2384),NONE(dist=NONE)	scaffold_136	29320	29320	C	T	hom	30
intergenic	gene_8286(dist=2392),NONE(dist=NONE)	e_gw1.136.45.1(dist=2392),NONE(dist=NONE)	scaffold_136	29328	29328	A	G	hom	30
intergenic	gene_8286(dist=2395),NONE(dist=NONE)	e_gw1.136.45.1(dist=2395),NONE(dist=NONE)	scaffold_136	29331	29331	T	C	hom	30
intergenic	gene_8286(dist=2409),NONE(dist=NONE)	e_gw1.136.45.1(dist=2409),NONE(dist=NONE)	scaffold_136	29345	29345	G	A	hom	30
intergenic	gene_8286(dist=2413),NONE(dist=NONE)	e_gw1.136.45.1(dist=2413),NONE(dist=NONE)	scaffold_136	29349	29349	G	A	hom	30
intergenic	gene_8286(dist=2428),NONE(dist=NONE)	e_gw1.136.45.1(dist=2428),NONE(dist=NONE)	scaffold_136	29364	29364	C	T	hom	30
intergenic	gene_8286(dist=2429),NONE(dist=NONE)	e_gw1.136.45.1(dist=2429),NONE(dist=NONE)	scaffold_136	29365	29365	T	C	hom	30
intergenic	gene_8286(dist=2432),NONE(dist=NONE)	e_gw1.136.45.1(dist=2432),NONE(dist=NONE)	scaffold_136	29368	29368	T	C	hom	30
intergenic	gene_8286(dist=2434),NONE(dist=NONE)	e_gw1.136.45.1(dist=2434),NONE(dist=NONE)	scaffold_136	29370	29370	A	G	hom	30
intergenic	gene_8286(dist=2435),NONE(dist=NONE)	e_gw1.136.45.1(dist=2435),NONE(dist=NONE)	scaffold_136	29371	29371	T	C	hom	30
intergenic	gene_8286(dist=2440),NONE(dist=NONE)	e_gw1.136.45.1(dist=2440),NONE(dist=NONE)	scaffold_136	29376	29376	A	G	hom	30
intergenic	gene_8286(dist=2450),NONE(dist=NONE)	e_gw1.136.45.1(dist=2450),NONE(dist=NONE)	scaffold_136	29386	29386	A	G	hom	30
intergenic	gene_8286(dist=2451),NONE(dist=NONE)	e_gw1.136.45.1(dist=2451),NONE(dist=NONE)	scaffold_136	29387	29387	G	A	hom	30
intergenic	gene_8286(dist=2455),NONE(dist=NONE)	e_gw1.136.45.1(dist=2455),NONE(dist=NONE)	scaffold_136	29391	29391	A	G	hom	30
intergenic	gene_8286(dist=2470),NONE(dist=NONE)	e_gw1.136.45.1(dist=2470),NONE(dist=NONE)	scaffold_136	29406	29406	A	G	hom	30
intergenic	gene_8286(dist=2472),NONE(dist=NONE)	e_gw1.136.45.1(dist=2472),NONE(dist=NONE)	scaffold_136	29408	29408	A	G	hom	30
intergenic	gene_8286(dist=2474),NONE(dist=NONE)	e_gw1.136.45.1(dist=2474),NONE(dist=NONE)	scaffold_136	29410	29410	A	G	hom	30
intergenic	gene_8286(dist=2487),NONE(dist=NONE)	e_gw1.136.45.1(dist=2487),NONE(dist=NONE)	scaffold_136	29423	29423	T	C	hom	30
intergenic	gene_8286(dist=2488),NONE(dist=NONE)	e_gw1.136.45.1(dist=2488),NONE(dist=NONE)	scaffold_136	29424	29424	T	C	hom	30
intergenic	gene_8286(dist=2490),NONE(dist=NONE)	e_gw1.136.45.1(dist=2490),NONE(dist=NONE)	scaffold_136	29426	29426	T	C	hom	30
intergenic	gene_8286(dist=2497),NONE(dist=NONE)	e_gw1.136.45.1(dist=2497),NONE(dist=NONE)	scaffold_136	29433	29433	C	T	hom	30
intergenic	gene_8286(dist=2499),NONE(dist=NONE)	e_gw1.136.45.1(dist=2499),NONE(dist=NONE)	scaffold_136	29435	29435	A	G	hom	30
intergenic	gene_8286(dist=2505),NONE(dist=NONE)	e_gw1.136.45.1(dist=2505),NONE(dist=NONE)	scaffold_136	29441	29441	G	A	hom	30
intergenic	gene_8286(dist=2518),NONE(dist=NONE)	e_gw1.136.45.1(dist=2518),NONE(dist=NONE)	scaffold_136	29454	29454	A	G	hom	30
intergenic	gene_8286(dist=2528),NONE(dist=NONE)	e_gw1.136.45.1(dist=2528),NONE(dist=NONE)	scaffold_136	29464	29464	T	C	hom	30
intergenic	gene_8286(dist=2558),NONE(dist=NONE)	e_gw1.136.45.1(dist=2558),NONE(dist=NONE)	scaffold_136	29494	29494	A	G	hom	30
intergenic	gene_8286(dist=2560),NONE(dist=NONE)	e_gw1.136.45.1(dist=2560),NONE(dist=NONE)	scaffold_136	29496	29496	A	G	hom	30
intergenic	gene_8286(dist=2561),NONE(dist=NONE)	e_gw1.136.45.1(dist=2561),NONE(dist=NONE)	scaffold_136	29497	29497	G	A	hom	30
intergenic	gene_8286(dist=2569),NONE(dist=NONE)	e_gw1.136.45.1(dist=2569),NONE(dist=NONE)	scaffold_136	29505	29505	C	T	hom	30
intergenic	gene_8286(dist=2574),NONE(dist=NONE)	e_gw1.136.45.1(dist=2574),NONE(dist=NONE)	scaffold_136	29510	29510	T	C	hom	30
intergenic	gene_8286(dist=2579),NONE(dist=NONE)	e_gw1.136.45.1(dist=2579),NONE(dist=NONE)	scaffold_136	29515	29515	G	A	hom	30
intergenic	gene_8286(dist=2662),NONE(dist=NONE)	e_gw1.136.45.1(dist=2662),NONE(dist=NONE)	scaffold_136	29598	29598	T	C	hom	30
intergenic	gene_8286(dist=2664),NONE(dist=NONE)	e_gw1.136.45.1(dist=2664),NONE(dist=NONE)	scaffold_136	29600	29600	A	G	hom	30
intergenic	gene_8286(dist=2666),NONE(dist=NONE)	e_gw1.136.45.1(dist=2666),NONE(dist=NONE)	scaffold_136	29602	29602	A	G	hom	30
intergenic	gene_8286(dist=2689),NONE(dist=NONE)	e_gw1.136.45.1(dist=2689),NONE(dist=NONE)	scaffold_136	29625	29625	T	C	hom	30
intergenic	gene_8286(dist=2694),NONE(dist=NONE)	e_gw1.136.45.1(dist=2694),NONE(dist=NONE)	scaffold_136	29630	29630	T	C	hom	30
intergenic	gene_8286(dist=2697),NONE(dist=NONE)	e_gw1.136.45.1(dist=2697),NONE(dist=NONE)	scaffold_136	29633	29633	C	T	hom	30
intergenic	gene_8286(dist=2714),NONE(dist=NONE)	e_gw1.136.45.1(dist=2714),NONE(dist=NONE)	scaffold_136	29650	29650	C	T	hom	30
intergenic	gene_8286(dist=2720),NONE(dist=NONE)	e_gw1.136.45.1(dist=2720),NONE(dist=NONE)	scaffold_136	29656	29656	C	T	hom	30
intergenic	gene_8286(dist=2725),NONE(dist=NONE)	e_gw1.136.45.1(dist=2725),NONE(dist=NONE)	scaffold_136	29661	29661	A	G	hom	30
intergenic	gene_8286(dist=2727),NONE(dist=NONE)	e_gw1.136.45.1(dist=2727),NONE(dist=NONE)	scaffold_136	29663	29663	A	G	hom	30
intergenic	gene_8286(dist=2728),NONE(dist=NONE)	e_gw1.136.45.1(dist=2728),NONE(dist=NONE)	scaffold_136	29664	29664	T	A	hom	30
intergenic	gene_8286(dist=2741),NONE(dist=NONE)	e_gw1.136.45.1(dist=2741),NONE(dist=NONE)	scaffold_136	29677	29677	A	G	hom	30
intergenic	gene_8286(dist=2751),NONE(dist=NONE)	e_gw1.136.45.1(dist=2751),NONE(dist=NONE)	scaffold_136	29687	29687	A	G	hom	30
intergenic	gene_8286(dist=2772),NONE(dist=NONE)	e_gw1.136.45.1(dist=2772),NONE(dist=NONE)	scaffold_136	29708	29708	T	C	hom	30
intergenic	gene_8286(dist=2776),NONE(dist=NONE)	e_gw1.136.45.1(dist=2776),NONE(dist=NONE)	scaffold_136	29712	29712	T	C	hom	30
intergenic	gene_8286(dist=2779),NONE(dist=NONE)	e_gw1.136.45.1(dist=2779),NONE(dist=NONE)	scaffold_136	29715	29715	A	G	hom	30
intergenic	gene_8286(dist=2788),NONE(dist=NONE)	e_gw1.136.45.1(dist=2788),NONE(dist=NONE)	scaffold_136	29724	29724	T	C	hom	30
intergenic	gene_8286(dist=2790),NONE(dist=NONE)	e_gw1.136.45.1(dist=2790),NONE(dist=NONE)	scaffold_136	29726	29726	A	G	hom	30
intergenic	gene_8286(dist=2798),NONE(dist=NONE)	e_gw1.136.45.1(dist=2798),NONE(dist=NONE)	scaffold_136	29734	29734	C	T	hom	30
intergenic	gene_8286(dist=2799),NONE(dist=NONE)	e_gw1.136.45.1(dist=2799),NONE(dist=NONE)	scaffold_136	29735	29735	A	G	hom	30
intergenic	gene_8286(dist=2800),NONE(dist=NONE)	e_gw1.136.45.1(dist=2800),NONE(dist=NONE)	scaffold_136	29736	29736	G	A	hom	30
intergenic	gene_8286(dist=2802),NONE(dist=NONE)	e_gw1.136.45.1(dist=2802),NONE(dist=NONE)	scaffold_136	29738	29738	G	A	hom	30
intergenic	gene_8286(dist=2805),NONE(dist=NONE)	e_gw1.136.45.1(dist=2805),NONE(dist=NONE)	scaffold_136	29741	29741	G	A	hom	30
intergenic	gene_8286(dist=2810),NONE(dist=NONE)	e_gw1.136.45.1(dist=2810),NONE(dist=NONE)	scaffold_136	29746	29746	T	C	hom	30
intergenic	gene_8286(dist=2814),NONE(dist=NONE)	e_gw1.136.45.1(dist=2814),NONE(dist=NONE)	scaffold_136	29750	29750	A	G	hom	30
intergenic	gene_8286(dist=2826),NONE(dist=NONE)	e_gw1.136.45.1(dist=2826),NONE(dist=NONE)	scaffold_136	29762	29762	A	G	hom	30
intergenic	gene_8286(dist=2830),NONE(dist=NONE)	e_gw1.136.45.1(dist=2830),NONE(dist=NONE)	scaffold_136	29766	29766	A	G	hom	30
intergenic	gene_8286(dist=2837),NONE(dist=NONE)	e_gw1.136.45.1(dist=2837),NONE(dist=NONE)	scaffold_136	29773	29773	C	T	hom	30
intergenic	gene_8286(dist=2850),NONE(dist=NONE)	e_gw1.136.45.1(dist=2850),NONE(dist=NONE)	scaffold_136	29786	29786	T	G	hom	30
intergenic	gene_8286(dist=2855),NONE(dist=NONE)	e_gw1.136.45.1(dist=2855),NONE(dist=NONE)	scaffold_136	29791	29791	C	T	hom	30
intergenic	gene_8286(dist=2857),NONE(dist=NONE)	e_gw1.136.45.1(dist=2857),NONE(dist=NONE)	scaffold_136	29793	29793	C	T	hom	30
intergenic	gene_8286(dist=2862),NONE(dist=NONE)	e_gw1.136.45.1(dist=2862),NONE(dist=NONE)	scaffold_136	29798	29798	G	A	hom	30
intergenic	gene_8286(dist=2873),NONE(dist=NONE)	e_gw1.136.45.1(dist=2873),NONE(dist=NONE)	scaffold_136	29809	29809	A	G	hom	30
intergenic	gene_8286(dist=2877),NONE(dist=NONE)	e_gw1.136.45.1(dist=2877),NONE(dist=NONE)	scaffold_136	29813	29813	T	C	hom	30
intergenic	gene_8286(dist=2886),NONE(dist=NONE)	e_gw1.136.45.1(dist=2886),NONE(dist=NONE)	scaffold_136	29822	29822	C	T	hom	30
intergenic	gene_8286(dist=2888),NONE(dist=NONE)	e_gw1.136.45.1(dist=2888),NONE(dist=NONE)	scaffold_136	29824	29824	T	C	hom	30
intergenic	gene_8286(dist=2932),NONE(dist=NONE)	e_gw1.136.45.1(dist=2932),NONE(dist=NONE)	scaffold_136	29868	29868	T	C	hom	30
intergenic	gene_8286(dist=2935),NONE(dist=NONE)	e_gw1.136.45.1(dist=2935),NONE(dist=NONE)	scaffold_136	29871	29871	T	C	hom	30
intergenic	gene_8286(dist=2953),NONE(dist=NONE)	e_gw1.136.45.1(dist=2953),NONE(dist=NONE)	scaffold_136	29889	29889	C	T	hom	30
intergenic	gene_8286(dist=2955),NONE(dist=NONE)	e_gw1.136.45.1(dist=2955),NONE(dist=NONE)	scaffold_136	29891	29891	A	G	hom	30
intergenic	gene_8286(dist=2960),NONE(dist=NONE)	e_gw1.136.45.1(dist=2960),NONE(dist=NONE)	scaffold_136	29896	29896	A	G	hom	30
intergenic	gene_8286(dist=2962),NONE(dist=NONE)	e_gw1.136.45.1(dist=2962),NONE(dist=NONE)	scaffold_136	29898	29898	A	G	hom	30
intergenic	gene_8286(dist=2964),NONE(dist=NONE)	e_gw1.136.45.1(dist=2964),NONE(dist=NONE)	scaffold_136	29900	29900	A	G	hom	30
intergenic	gene_8286(dist=2967),NONE(dist=NONE)	e_gw1.136.45.1(dist=2967),NONE(dist=NONE)	scaffold_136	29903	29903	C	G	hom	30
intergenic	gene_8286(dist=2969),NONE(dist=NONE)	e_gw1.136.45.1(dist=2969),NONE(dist=NONE)	scaffold_136	29905	29905	A	G	hom	30
intergenic	gene_8286(dist=2970),NONE(dist=NONE)	e_gw1.136.45.1(dist=2970),NONE(dist=NONE)	scaffold_136	29906	29906	A	T	hom	30
intergenic	gene_8286(dist=2971),NONE(dist=NONE)	e_gw1.136.45.1(dist=2971),NONE(dist=NONE)	scaffold_136	29907	29907	A	T	hom	30
intergenic	gene_8286(dist=2993),NONE(dist=NONE)	e_gw1.136.45.1(dist=2993),NONE(dist=NONE)	scaffold_136	29929	29929	A	G	hom	30
intergenic	gene_8286(dist=2994),NONE(dist=NONE)	e_gw1.136.45.1(dist=2994),NONE(dist=NONE)	scaffold_136	29930	29930	T	C	hom	30
intergenic	gene_8286(dist=2996),NONE(dist=NONE)	e_gw1.136.45.1(dist=2996),NONE(dist=NONE)	scaffold_136	29932	29932	G	A	hom	30
intergenic	gene_8286(dist=3013),NONE(dist=NONE)	e_gw1.136.45.1(dist=3013),NONE(dist=NONE)	scaffold_136	29949	29949	G	A	hom	30
intergenic	gene_8286(dist=3044),NONE(dist=NONE)	e_gw1.136.45.1(dist=3044),NONE(dist=NONE)	scaffold_136	29980	29980	T	C	hom	30
intergenic	gene_8286(dist=3049),NONE(dist=NONE)	e_gw1.136.45.1(dist=3049),NONE(dist=NONE)	scaffold_136	29985	29985	C	T	hom	30
intergenic	gene_8286(dist=3051),NONE(dist=NONE)	e_gw1.136.45.1(dist=3051),NONE(dist=NONE)	scaffold_136	29987	29987	G	A	hom	30
intergenic	gene_8286(dist=3063),NONE(dist=NONE)	e_gw1.136.45.1(dist=3063),NONE(dist=NONE)	scaffold_136	29999	29999	T	C	hom	30
intergenic	gene_8286(dist=3084),NONE(dist=NONE)	e_gw1.136.45.1(dist=3084),NONE(dist=NONE)	scaffold_136	30020	30020	T	C	hom	30
intergenic	gene_8286(dist=3086),NONE(dist=NONE)	e_gw1.136.45.1(dist=3086),NONE(dist=NONE)	scaffold_136	30022	30022	A	G	hom	30
intergenic	gene_8286(dist=3088),NONE(dist=NONE)	e_gw1.136.45.1(dist=3088),NONE(dist=NONE)	scaffold_136	30024	30024	A	G	hom	30
intergenic	gene_8286(dist=3097),NONE(dist=NONE)	e_gw1.136.45.1(dist=3097),NONE(dist=NONE)	scaffold_136	30033	30033	T	G	hom	30
intergenic	gene_8286(dist=3102),NONE(dist=NONE)	e_gw1.136.45.1(dist=3102),NONE(dist=NONE)	scaffold_136	30038	30038	G	A	hom	30
intergenic	gene_8286(dist=3114),NONE(dist=NONE)	e_gw1.136.45.1(dist=3114),NONE(dist=NONE)	scaffold_136	30050	30050	C	T	hom	30
intergenic	gene_8286(dist=3116),NONE(dist=NONE)	e_gw1.136.45.1(dist=3116),NONE(dist=NONE)	scaffold_136	30052	30052	C	T	hom	30
intergenic	gene_8286(dist=3119),NONE(dist=NONE)	e_gw1.136.45.1(dist=3119),NONE(dist=NONE)	scaffold_136	30055	30055	C	T	hom	30
intergenic	gene_8286(dist=3130),NONE(dist=NONE)	e_gw1.136.45.1(dist=3130),NONE(dist=NONE)	scaffold_136	30066	30066	T	C	hom	30
intergenic	gene_8286(dist=3137),NONE(dist=NONE)	e_gw1.136.45.1(dist=3137),NONE(dist=NONE)	scaffold_136	30073	30073	T	C	hom	30
intergenic	gene_8286(dist=3143),NONE(dist=NONE)	e_gw1.136.45.1(dist=3143),NONE(dist=NONE)	scaffold_136	30079	30079	A	G	hom	30
intergenic	gene_8286(dist=3158),NONE(dist=NONE)	e_gw1.136.45.1(dist=3158),NONE(dist=NONE)	scaffold_136	30094	30094	T	C	hom	30
intergenic	gene_8286(dist=3161),NONE(dist=NONE)	e_gw1.136.45.1(dist=3161),NONE(dist=NONE)	scaffold_136	30097	30097	C	T	hom	30
intergenic	gene_8286(dist=3165),NONE(dist=NONE)	e_gw1.136.45.1(dist=3165),NONE(dist=NONE)	scaffold_136	30101	30101	C	T	hom	30
intergenic	gene_8286(dist=3171),NONE(dist=NONE)	e_gw1.136.45.1(dist=3171),NONE(dist=NONE)	scaffold_136	30107	30107	C	T	hom	30
intergenic	gene_8286(dist=3175),NONE(dist=NONE)	e_gw1.136.45.1(dist=3175),NONE(dist=NONE)	scaffold_136	30111	30111	A	G	hom	30
intergenic	gene_8286(dist=3179),NONE(dist=NONE)	e_gw1.136.45.1(dist=3179),NONE(dist=NONE)	scaffold_136	30115	30115	G	A	hom	30
intergenic	gene_8286(dist=3185),NONE(dist=NONE)	e_gw1.136.45.1(dist=3185),NONE(dist=NONE)	scaffold_136	30121	30121	G	A	hom	30
intergenic	gene_8286(dist=3186),NONE(dist=NONE)	e_gw1.136.45.1(dist=3186),NONE(dist=NONE)	scaffold_136	30122	30122	G	A	hom	30
intergenic	gene_8286(dist=3192),NONE(dist=NONE)	e_gw1.136.45.1(dist=3192),NONE(dist=NONE)	scaffold_136	30128	30128	T	C	hom	30
intergenic	gene_8286(dist=3198),NONE(dist=NONE)	e_gw1.136.45.1(dist=3198),NONE(dist=NONE)	scaffold_136	30134	30134	A	G	hom	30
intergenic	gene_8286(dist=3201),NONE(dist=NONE)	e_gw1.136.45.1(dist=3201),NONE(dist=NONE)	scaffold_136	30137	30137	A	G	hom	30
intergenic	gene_8286(dist=3216),NONE(dist=NONE)	e_gw1.136.45.1(dist=3216),NONE(dist=NONE)	scaffold_136	30152	30152	C	T	hom	30
intergenic	gene_8286(dist=3226),NONE(dist=NONE)	e_gw1.136.45.1(dist=3226),NONE(dist=NONE)	scaffold_136	30162	30162	A	G	hom	30
intergenic	gene_8286(dist=3235),NONE(dist=NONE)	e_gw1.136.45.1(dist=3235),NONE(dist=NONE)	scaffold_136	30171	30171	C	T	hom	30
intergenic	gene_8286(dist=3247),NONE(dist=NONE)	e_gw1.136.45.1(dist=3247),NONE(dist=NONE)	scaffold_136	30183	30183	A	G	hom	30
intergenic	gene_8286(dist=3248),NONE(dist=NONE)	e_gw1.136.45.1(dist=3248),NONE(dist=NONE)	scaffold_136	30184	30184	T	C	hom	30
intergenic	gene_8286(dist=3252),NONE(dist=NONE)	e_gw1.136.45.1(dist=3252),NONE(dist=NONE)	scaffold_136	30188	30188	G	A	hom	30
intergenic	gene_8286(dist=3257),NONE(dist=NONE)	e_gw1.136.45.1(dist=3257),NONE(dist=NONE)	scaffold_136	30193	30193	C	T	hom	30
intergenic	gene_8286(dist=3267),NONE(dist=NONE)	e_gw1.136.45.1(dist=3267),NONE(dist=NONE)	scaffold_136	30203	30203	C	T	hom	30
intergenic	gene_8286(dist=3268),NONE(dist=NONE)	e_gw1.136.45.1(dist=3268),NONE(dist=NONE)	scaffold_136	30204	30204	C	T	hom	30
intergenic	gene_8286(dist=3270),NONE(dist=NONE)	e_gw1.136.45.1(dist=3270),NONE(dist=NONE)	scaffold_136	30206	30206	C	T	hom	30
intergenic	gene_8286(dist=3276),NONE(dist=NONE)	e_gw1.136.45.1(dist=3276),NONE(dist=NONE)	scaffold_136	30212	30212	A	G	hom	30
intergenic	gene_8286(dist=3277),NONE(dist=NONE)	e_gw1.136.45.1(dist=3277),NONE(dist=NONE)	scaffold_136	30213	30213	T	C	hom	30
intergenic	gene_8286(dist=3289),NONE(dist=NONE)	e_gw1.136.45.1(dist=3289),NONE(dist=NONE)	scaffold_136	30225	30225	G	A	hom	30
intergenic	gene_8286(dist=3295),NONE(dist=NONE)	e_gw1.136.45.1(dist=3295),NONE(dist=NONE)	scaffold_136	30231	30231	G	A	hom	30
intergenic	gene_8286(dist=3299),NONE(dist=NONE)	e_gw1.136.45.1(dist=3299),NONE(dist=NONE)	scaffold_136	30235	30235	G	A	hom	30
intergenic	gene_8286(dist=3309),NONE(dist=NONE)	e_gw1.136.45.1(dist=3309),NONE(dist=NONE)	scaffold_136	30245	30245	C	T	hom	30
intergenic	gene_8286(dist=3311),NONE(dist=NONE)	e_gw1.136.45.1(dist=3311),NONE(dist=NONE)	scaffold_136	30247	30247	G	A	hom	30
intergenic	gene_8286(dist=3315),NONE(dist=NONE)	e_gw1.136.45.1(dist=3315),NONE(dist=NONE)	scaffold_136	30251	30251	A	G	hom	30
intergenic	gene_8286(dist=3316),NONE(dist=NONE)	e_gw1.136.45.1(dist=3316),NONE(dist=NONE)	scaffold_136	30252	30252	T	C	hom	30
intergenic	gene_8286(dist=3327),NONE(dist=NONE)	e_gw1.136.45.1(dist=3327),NONE(dist=NONE)	scaffold_136	30263	30263	G	A	hom	30
intergenic	gene_8286(dist=3342),NONE(dist=NONE)	e_gw1.136.45.1(dist=3342),NONE(dist=NONE)	scaffold_136	30278	30278	T	C	hom	30
intergenic	gene_8286(dist=3345),NONE(dist=NONE)	e_gw1.136.45.1(dist=3345),NONE(dist=NONE)	scaffold_136	30281	30281	A	T	hom	30
intergenic	gene_8286(dist=3347),NONE(dist=NONE)	e_gw1.136.45.1(dist=3347),NONE(dist=NONE)	scaffold_136	30283	30283	G	A	hom	30
intergenic	gene_8286(dist=3353),NONE(dist=NONE)	e_gw1.136.45.1(dist=3353),NONE(dist=NONE)	scaffold_136	30289	30289	A	G	hom	30
intergenic	gene_8286(dist=3354),NONE(dist=NONE)	e_gw1.136.45.1(dist=3354),NONE(dist=NONE)	scaffold_136	30290	30290	T	C	hom	30
intergenic	gene_8286(dist=3355),NONE(dist=NONE)	e_gw1.136.45.1(dist=3355),NONE(dist=NONE)	scaffold_136	30291	30291	C	T	hom	30
intergenic	gene_8286(dist=3358),NONE(dist=NONE)	e_gw1.136.45.1(dist=3358),NONE(dist=NONE)	scaffold_136	30294	30294	T	C	hom	30
intergenic	gene_8286(dist=3365),NONE(dist=NONE)	e_gw1.136.45.1(dist=3365),NONE(dist=NONE)	scaffold_136	30301	30301	G	A	hom	30
intergenic	gene_8286(dist=3366),NONE(dist=NONE)	e_gw1.136.45.1(dist=3366),NONE(dist=NONE)	scaffold_136	30302	30302	T	C	hom	30
intergenic	gene_8286(dist=3367),NONE(dist=NONE)	e_gw1.136.45.1(dist=3367),NONE(dist=NONE)	scaffold_136	30303	30303	G	A	hom	30
intergenic	gene_8286(dist=3374),NONE(dist=NONE)	e_gw1.136.45.1(dist=3374),NONE(dist=NONE)	scaffold_136	30310	30310	G	A	hom	30
intergenic	gene_8286(dist=3378),NONE(dist=NONE)	e_gw1.136.45.1(dist=3378),NONE(dist=NONE)	scaffold_136	30314	30314	C	T	hom	30
intergenic	gene_8286(dist=3380),NONE(dist=NONE)	e_gw1.136.45.1(dist=3380),NONE(dist=NONE)	scaffold_136	30316	30316	A	G	hom	30
intergenic	gene_8286(dist=3384),NONE(dist=NONE)	e_gw1.136.45.1(dist=3384),NONE(dist=NONE)	scaffold_136	30320	30320	G	A	hom	30
intergenic	gene_8286(dist=3397),NONE(dist=NONE)	e_gw1.136.45.1(dist=3397),NONE(dist=NONE)	scaffold_136	30333	30333	G	A	hom	30
intergenic	gene_8286(dist=3402),NONE(dist=NONE)	e_gw1.136.45.1(dist=3402),NONE(dist=NONE)	scaffold_136	30338	30338	G	A	hom	30
intergenic	gene_8286(dist=3404),NONE(dist=NONE)	e_gw1.136.45.1(dist=3404),NONE(dist=NONE)	scaffold_136	30340	30340	G	A	hom	30
intergenic	gene_8286(dist=3407),NONE(dist=NONE)	e_gw1.136.45.1(dist=3407),NONE(dist=NONE)	scaffold_136	30343	30343	G	A	hom	30
intergenic	gene_8286(dist=3413),NONE(dist=NONE)	e_gw1.136.45.1(dist=3413),NONE(dist=NONE)	scaffold_136	30349	30349	A	G	hom	30
intergenic	gene_8286(dist=3422),NONE(dist=NONE)	e_gw1.136.45.1(dist=3422),NONE(dist=NONE)	scaffold_136	30358	30358	G	A	hom	30
intergenic	gene_8286(dist=3425),NONE(dist=NONE)	e_gw1.136.45.1(dist=3425),NONE(dist=NONE)	scaffold_136	30361	30361	T	C	hom	30
intergenic	gene_8286(dist=3427),NONE(dist=NONE)	e_gw1.136.45.1(dist=3427),NONE(dist=NONE)	scaffold_136	30363	30363	A	G	hom	30
intergenic	gene_8286(dist=3432),NONE(dist=NONE)	e_gw1.136.45.1(dist=3432),NONE(dist=NONE)	scaffold_136	30368	30368	T	C	hom	30
intergenic	gene_8286(dist=3444),NONE(dist=NONE)	e_gw1.136.45.1(dist=3444),NONE(dist=NONE)	scaffold_136	30380	30380	C	T	hom	30
intergenic	gene_8286(dist=3451),NONE(dist=NONE)	e_gw1.136.45.1(dist=3451),NONE(dist=NONE)	scaffold_136	30387	30387	C	T	hom	30
intergenic	gene_8286(dist=3461),NONE(dist=NONE)	e_gw1.136.45.1(dist=3461),NONE(dist=NONE)	scaffold_136	30397	30397	A	G	hom	30
intergenic	gene_8286(dist=3472),NONE(dist=NONE)	e_gw1.136.45.1(dist=3472),NONE(dist=NONE)	scaffold_136	30408	30408	C	T	hom	30
intergenic	gene_8286(dist=3476),NONE(dist=NONE)	e_gw1.136.45.1(dist=3476),NONE(dist=NONE)	scaffold_136	30412	30412	C	G	hom	30
intergenic	gene_8286(dist=3477),NONE(dist=NONE)	e_gw1.136.45.1(dist=3477),NONE(dist=NONE)	scaffold_136	30413	30413	C	T	hom	30
intergenic	gene_8286(dist=3481),NONE(dist=NONE)	e_gw1.136.45.1(dist=3481),NONE(dist=NONE)	scaffold_136	30417	30417	A	G	hom	30
intergenic	gene_8286(dist=3500),NONE(dist=NONE)	e_gw1.136.45.1(dist=3500),NONE(dist=NONE)	scaffold_136	30436	30436	T	C	hom	30
intergenic	gene_8286(dist=3506),NONE(dist=NONE)	e_gw1.136.45.1(dist=3506),NONE(dist=NONE)	scaffold_136	30442	30442	T	C	hom	30
intergenic	gene_8286(dist=3508),NONE(dist=NONE)	e_gw1.136.45.1(dist=3508),NONE(dist=NONE)	scaffold_136	30444	30444	A	G	hom	30
intergenic	gene_8286(dist=3527),NONE(dist=NONE)	e_gw1.136.45.1(dist=3527),NONE(dist=NONE)	scaffold_136	30463	30463	G	A	hom	30
intergenic	gene_8286(dist=3537),NONE(dist=NONE)	e_gw1.136.45.1(dist=3537),NONE(dist=NONE)	scaffold_136	30473	30473	A	G	hom	30
intergenic	gene_8286(dist=3540),NONE(dist=NONE)	e_gw1.136.45.1(dist=3540),NONE(dist=NONE)	scaffold_136	30476	30476	A	G	hom	30
intergenic	gene_8286(dist=3544),NONE(dist=NONE)	e_gw1.136.45.1(dist=3544),NONE(dist=NONE)	scaffold_136	30480	30480	T	C	hom	30
intergenic	gene_8286(dist=3550),NONE(dist=NONE)	e_gw1.136.45.1(dist=3550),NONE(dist=NONE)	scaffold_136	30486	30486	A	G	hom	30
intergenic	gene_8286(dist=3555),NONE(dist=NONE)	e_gw1.136.45.1(dist=3555),NONE(dist=NONE)	scaffold_136	30491	30491	T	C	hom	30
intergenic	gene_8286(dist=3557),NONE(dist=NONE)	e_gw1.136.45.1(dist=3557),NONE(dist=NONE)	scaffold_136	30493	30493	C	T	hom	30
intergenic	gene_8286(dist=3558),NONE(dist=NONE)	e_gw1.136.45.1(dist=3558),NONE(dist=NONE)	scaffold_136	30494	30494	A	G	hom	30
intergenic	gene_8286(dist=3565),NONE(dist=NONE)	e_gw1.136.45.1(dist=3565),NONE(dist=NONE)	scaffold_136	30501	30501	T	C	hom	30
intergenic	gene_8286(dist=3571),NONE(dist=NONE)	e_gw1.136.45.1(dist=3571),NONE(dist=NONE)	scaffold_136	30507	30507	C	T	hom	30
intergenic	gene_8286(dist=3573),NONE(dist=NONE)	e_gw1.136.45.1(dist=3573),NONE(dist=NONE)	scaffold_136	30509	30509	G	A	hom	30
intergenic	gene_8286(dist=3576),NONE(dist=NONE)	e_gw1.136.45.1(dist=3576),NONE(dist=NONE)	scaffold_136	30512	30512	G	A	hom	30
intergenic	gene_8286(dist=3581),NONE(dist=NONE)	e_gw1.136.45.1(dist=3581),NONE(dist=NONE)	scaffold_136	30517	30517	A	G	hom	30
intergenic	gene_8286(dist=3606),NONE(dist=NONE)	e_gw1.136.45.1(dist=3606),NONE(dist=NONE)	scaffold_136	30542	30542	T	C	hom	30
intergenic	gene_8286(dist=7435),NONE(dist=NONE)	e_gw1.136.45.1(dist=7435),NONE(dist=NONE)	scaffold_136	34371	34371	A	C	hom	30
intergenic	gene_8286(dist=9602),NONE(dist=NONE)	e_gw1.136.45.1(dist=9602),NONE(dist=NONE)	scaffold_136	36538	36538	A	T	hom	30
intergenic	gene_8286(dist=20419),NONE(dist=NONE)	e_gw1.136.45.1(dist=20419),NONE(dist=NONE)	scaffold_136	47355	47355	A	C	hom	30
intergenic	gene_8286(dist=22440),NONE(dist=NONE)	e_gw1.136.45.1(dist=22440),NONE(dist=NONE)	scaffold_136	49376	49376	G	A	hom	30
intergenic	gene_8286(dist=27015),NONE(dist=NONE)	e_gw1.136.45.1(dist=27015),NONE(dist=NONE)	scaffold_136	53951	53951	G	A	hom	30
intergenic	gene_8286(dist=28800),NONE(dist=NONE)	e_gw1.136.45.1(dist=28800),NONE(dist=NONE)	scaffold_136	55736	55736	T	A	hom	30
intergenic	gene_8286(dist=31072),NONE(dist=NONE)	e_gw1.136.45.1(dist=31072),NONE(dist=NONE)	scaffold_136	58008	58008	C	T	hom	30
exonic	gene_8289	estExt_Genemark1.C_1370002	scaffold_137	7306	7306	T	C	hom	30
exonic	gene_8334	CE72363_12836	scaffold_139	28201	28201	G	C	hom	30
exonic	gene_1733	CE72914_46826	scaffold_14	7364	7364	T	A	hom	30
intronic	gene_1736	estExt_Genemark1.C_140004	scaffold_14	16954	16954	G	A	hom	30
UTR3	gene_1737	fgenesh1_kg.14_#_7_#_Locus2087v1rpkm61.52	scaffold_14	18731	18731	G	A	hom	30
downstream	gene_1751,gene_1752	e_gw1.14.131.1,gm1.1410_g	scaffold_14	64868	64868	G	T	hom	30
downstream	gene_1751,gene_1752	e_gw1.14.131.1,gm1.1410_g	scaffold_14	64873	64873	G	A	hom	30
exonic	gene_1752	gm1.1410_g	scaffold_14	69236	69236	A	C	hom	30
downstream	gene_1756,gene_1757	estExt_Genewise1.C_140047,estExt_fgenesh1_pm.C_140011	scaffold_14	82536	82536	T	C	hom	30
exonic	gene_1760	estExt_Genewise1.C_140051	scaffold_14	97775	97775	A	G	hom	30
intronic	gene_1764	fgenesh1_kg.14_#_46_#_Locus1406v1rpkm103.57	scaffold_14	111946	111946	T	C	hom	30
upstream;downstream	gene_1768;gene_1771	fgenesh1_kg.14_#_50_#_Locus9772v2rpkm0.49;estExt_Genewise1Plus.C_140062	scaffold_14	120217	120217	G	A	hom	30
upstream;downstream	gene_1768;gene_1771	fgenesh1_kg.14_#_50_#_Locus9772v2rpkm0.49;estExt_Genewise1Plus.C_140062	scaffold_14	120237	120237	T	C	hom	30
upstream;downstream	gene_1768;gene_1771	fgenesh1_kg.14_#_50_#_Locus9772v2rpkm0.49;estExt_Genewise1Plus.C_140062	scaffold_14	120641	120641	A	T	hom	30
exonic	gene_1773	estExt_Genemark1.C_140039	scaffold_14	135213	135213	G	C	hom	30
intronic	gene_1774	gm1.1428_g	scaffold_14	138599	138599	G	A	hom	30
exonic	gene_1775	gm1.1429_g	scaffold_14	141178	141178	G	T	hom	30
exonic	gene_1775	gm1.1429_g	scaffold_14	141180	141180	C	T	hom	30
exonic	gene_1775	gm1.1429_g	scaffold_14	141181	141181	A	T	hom	30
exonic	gene_1775	gm1.1429_g	scaffold_14	141182	141182	A	T	hom	30
exonic	gene_1775	gm1.1429_g	scaffold_14	141183	141183	G	T	hom	30
exonic	gene_1775	gm1.1429_g	scaffold_14	141184	141184	C	T	hom	30
exonic	gene_1775	gm1.1429_g	scaffold_14	141186	141186	G	T	hom	30
exonic	gene_1775	gm1.1429_g	scaffold_14	141187	141187	G	T	hom	30
exonic	gene_1775	gm1.1429_g	scaffold_14	141189	141189	C	T	hom	30
exonic	gene_1775	gm1.1429_g	scaffold_14	141190	141190	A	T	hom	30
exonic	gene_1775	gm1.1429_g	scaffold_14	141191	141191	G	T	hom	30
exonic	gene_1775	gm1.1429_g	scaffold_14	141192	141192	G	T	hom	30
exonic	gene_1775	gm1.1429_g	scaffold_14	141193	141193	A	T	hom	30
exonic	gene_1775	gm1.1429_g	scaffold_14	141197	141197	A	T	hom	30
exonic	gene_1775	gm1.1429_g	scaffold_14	141198	141198	G	T	hom	30
downstream	gene_1775,gene_1776	estExt_Genemark1.C_140042,gm1.1429_g	scaffold_14	141199	141199	A	T	hom	30
downstream	gene_1775,gene_1776	estExt_Genemark1.C_140042,gm1.1429_g	scaffold_14	141201	141201	A	T	hom	30
downstream	gene_1775,gene_1776	estExt_Genemark1.C_140042,gm1.1429_g	scaffold_14	141203	141203	G	T	hom	30
exonic	gene_1776	estExt_Genemark1.C_140042	scaffold_14	141851	141851	A	C	hom	30
exonic	gene_1791	CE75289_534	scaffold_14	169492	169492	C	T	hom	30
intronic	gene_1794	fgenesh1_kg.14_#_71_#_Locus1543v1rpkm92.28	scaffold_14	172330	172330	T	G	hom	30
UTR3	gene_1806	fgenesh1_kg.14_#_80_#_Locus5711v1rpkm8.57	scaffold_14	195936	195936	C	T	hom	30
UTR3	gene_1806	fgenesh1_kg.14_#_80_#_Locus5711v1rpkm8.57	scaffold_14	195938	195938	C	T	hom	30
exonic	gene_1814	fgenesh1_kg.14_#_87_#_Locus2376v2rpkm9.57	scaffold_14	227239	227239	C	T	hom	30
intergenic	gene_1814(dist=2323),gene_1815(dist=5858)	fgenesh1_kg.14_#_87_#_Locus2376v2rpkm9.57(dist=2323),fgenesh1_kg.14_#_90_#_Locus979v3rpkm3.75_PRE(dist=5858)	scaffold_14	231065	231065	G	A	hom	30
intergenic	gene_1814(dist=6772),gene_1815(dist=1409)	fgenesh1_kg.14_#_87_#_Locus2376v2rpkm9.57(dist=6772),fgenesh1_kg.14_#_90_#_Locus979v3rpkm3.75_PRE(dist=1409)	scaffold_14	235514	235514	A	C	hom	30
intergenic	gene_1814(dist=7043),gene_1815(dist=1138)	fgenesh1_kg.14_#_87_#_Locus2376v2rpkm9.57(dist=7043),fgenesh1_kg.14_#_90_#_Locus979v3rpkm3.75_PRE(dist=1138)	scaffold_14	235785	235785	G	A	hom	30
exonic	gene_8359	e_gw1.140.11.1	scaffold_140	37794	37794	A	G	hom	30
upstream	gene_8359	e_gw1.140.11.1	scaffold_140	38664	38664	C	T	hom	30
upstream	gene_8359	e_gw1.140.11.1	scaffold_140	38680	38680	A	G	hom	30
upstream	gene_8359	e_gw1.140.11.1	scaffold_140	38718	38718	A	G	hom	30
upstream	gene_8359	e_gw1.140.11.1	scaffold_140	38778	38778	C	T	hom	30
upstream	gene_8359	e_gw1.140.11.1	scaffold_140	38779	38779	A	G	hom	30
exonic	gene_8374	estExt_Genewise1Plus.C_1410010	scaffold_141	9392	9392	C	T	hom	30
exonic	gene_8390	e_gw1.141.43.1	scaffold_141	32645	32645	T	C	hom	30
UTR5	gene_8394	fgenesh1_kg.141_#_23_#_Locus1111v1rpkm139.06	scaffold_141	41496	41496	T	C	hom	30
upstream	gene_8397	CE79171_471	scaffold_141	46083	46083	T	C	hom	30
downstream	gene_8401	fgenesh1_kg.141_#_30_#_Locus3023v1rpkm35.35	scaffold_141	55099	55099	A	G	hom	30
downstream	gene_8401	fgenesh1_kg.141_#_30_#_Locus3023v1rpkm35.35	scaffold_141	55101	55101	C	A	hom	30
downstream	gene_8401	fgenesh1_kg.141_#_30_#_Locus3023v1rpkm35.35	scaffold_141	55102	55102	C	A	hom	30
downstream	gene_8401	fgenesh1_kg.141_#_30_#_Locus3023v1rpkm35.35	scaffold_141	55103	55103	T	G	hom	30
downstream	gene_8401	fgenesh1_kg.141_#_30_#_Locus3023v1rpkm35.35	scaffold_141	55107	55107	A	C	hom	30
downstream	gene_8401	fgenesh1_kg.141_#_30_#_Locus3023v1rpkm35.35	scaffold_141	55108	55108	G	C	hom	30
downstream	gene_8401	fgenesh1_kg.141_#_30_#_Locus3023v1rpkm35.35	scaffold_141	55111	55111	G	A	hom	30
downstream	gene_8401	fgenesh1_kg.141_#_30_#_Locus3023v1rpkm35.35	scaffold_141	55112	55112	T	A	hom	30
exonic	gene_8404	fgenesh1_kg.142_#_4_#_Locus5264v1rpkm11.02	scaffold_142	6761	6761	T	C	hom	30
UTR3	gene_8404	fgenesh1_kg.142_#_4_#_Locus5264v1rpkm11.02	scaffold_142	10952	10952	T	A	hom	30
upstream;downstream	gene_8405,gene_8406;gene_8407	CE79435_1231,fgenesh1_kg.142_#_7_#_Locus1045v1rpkm148.88;fgenesh1_kg.142_#_8_#_Locus4318v1rpkm18.71	scaffold_142	14243	14243	C	T	hom	30
exonic	gene_8412	gm1.6781_g	scaffold_142	35127	35127	G	A	hom	30
upstream	gene_8418	fgenesh1_pm.142_#_12	scaffold_142	43125	43125	C	T	hom	30
UTR3	gene_8422	fgenesh1_kg.142_#_27_#_Locus3658v1rpkm25.72	scaffold_142	56468	56468	A	T	hom	30
UTR3	gene_8422	fgenesh1_kg.142_#_27_#_Locus3658v1rpkm25.72	scaffold_142	56470	56470	A	T	hom	30
intergenic	gene_8426(dist=1042),gene_8427(dist=3841)	fgenesh1_pm.143_#_3(dist=1042),e_gw1.143.49.1(dist=3841)	scaffold_143	9688	9688	T	C	hom	30
exonic	gene_8429	estExt_fgenesh1_pm.C_1430006	scaffold_143	17541	17541	G	A	hom	30
exonic	gene_8429	estExt_fgenesh1_pm.C_1430006	scaffold_143	19382	19382	A	G	hom	30
exonic	gene_8444	estExt_Genewise1Plus.C_1430043	scaffold_143	47573	47573	T	G	hom	30
exonic	gene_8446	e_gw1.143.43.1	scaffold_143	52436	52436	G	C	hom	30
exonic	gene_8447	estExt_Genewise1Plus.C_1430051	scaffold_143	55619	55619	C	T	hom	30
intergenic	NONE(dist=NONE),gene_8449(dist=1861)	NONE(dist=NONE),e_gw1.144.14.1(dist=1861)	scaffold_144	833	833	C	T	hom	30
intergenic	NONE(dist=NONE),gene_8449(dist=1849)	NONE(dist=NONE),e_gw1.144.14.1(dist=1849)	scaffold_144	845	845	A	G	hom	30
intergenic	gene_8454(dist=1050),gene_8455(dist=6569)	fgenesh1_kg.144_#_11_#_Locus9967v2rpkm0.94(dist=1050),fgenesh1_kg.144_#_12_#_Locus3811v1rpkm24.02(dist=6569)	scaffold_144	22206	22206	A	T	hom	30
intergenic	gene_8455(dist=2969),NONE(dist=NONE)	fgenesh1_kg.144_#_12_#_Locus3811v1rpkm24.02(dist=2969),NONE(dist=NONE)	scaffold_144	34200	34200	C	A	hom	30
intergenic	gene_8455(dist=4984),NONE(dist=NONE)	fgenesh1_kg.144_#_12_#_Locus3811v1rpkm24.02(dist=4984),NONE(dist=NONE)	scaffold_144	36215	36215	C	T	hom	30
upstream	gene_8459,gene_8460	estExt_Genewise1.C_1450009,gm1.6820_g	scaffold_145	10240	10240	G	A	hom	30
exonic	gene_8473	fgenesh1_kg.145_#_17_#_Locus7316v1rpkm3.62	scaffold_145	42701	42701	G	A	hom	30
downstream	gene_8474	gm1.6833_g	scaffold_145	44838	44838	C	G	hom	30
exonic	gene_8479	e_gw1.146.50.1	scaffold_146	10536	10536	G	A	hom	30
exonic	gene_8499	e_gw1.146.33.1	scaffold_146	45527	45527	T	G	hom	30
downstream	gene_8500	fgenesh1_kg.146_#_28_#_Locus3042v1rpkm34.91	scaffold_146	51349	51349	T	G	hom	30
exonic	gene_8501	e_gw1.146.27.1	scaffold_146	52904	52904	T	C	hom	30
intronic	gene_8516	gm1.6863_g	scaffold_147	28996	28996	C	T	hom	30
exonic	gene_8527	estExt_fgenesh1_pm.C_1480001	scaffold_148	542	542	G	A	hom	30
exonic	gene_8527	estExt_fgenesh1_pm.C_1480001	scaffold_148	3552	3552	T	C	hom	30
upstream	gene_8529,gene_8530	fgenesh1_kg.148_#_4_#_Locus11822v1rpkm0.97,fgenesh1_pg.148_#_3	scaffold_148	10850	10850	G	A	hom	30
upstream	gene_8536,gene_8537	e_gw1.148.1.1,estExt_fgenesh1_pm.C_1480006	scaffold_148	24339	24339	A	G	hom	30
UTR5	gene_8540	fgenesh1_kg.148_#_16_#_Locus1144v1rpkm133.69	scaffold_148	37491	37491	G	A	hom	30
exonic	gene_8544	CE84299_1209	scaffold_148	45705	45705	A	T	hom	30
downstream	gene_8549	gm1.6886_g	scaffold_149	4215	4215	A	C	hom	30
downstream	gene_8549	gm1.6886_g	scaffold_149	5182	5182	G	T	hom	30
intergenic	gene_8549(dist=1010),gene_8551(dist=1874)	gm1.6886_g(dist=1010),fgenesh1_pg.149_#_2(dist=1874)	scaffold_149	5193	5193	A	C	hom	30
intergenic	gene_8549(dist=1040),gene_8551(dist=1844)	gm1.6886_g(dist=1040),fgenesh1_pg.149_#_2(dist=1844)	scaffold_149	5223	5223	C	T	hom	30
intergenic	gene_8549(dist=1079),gene_8551(dist=1805)	gm1.6886_g(dist=1079),fgenesh1_pg.149_#_2(dist=1805)	scaffold_149	5262	5262	A	G	hom	30
intergenic	gene_8549(dist=1206),gene_8551(dist=1678)	gm1.6886_g(dist=1206),fgenesh1_pg.149_#_2(dist=1678)	scaffold_149	5389	5389	G	A	hom	30
intergenic	gene_8549(dist=1214),gene_8551(dist=1670)	gm1.6886_g(dist=1214),fgenesh1_pg.149_#_2(dist=1670)	scaffold_149	5397	5397	C	T	hom	30
intergenic	gene_8549(dist=1427),gene_8551(dist=1457)	gm1.6886_g(dist=1427),fgenesh1_pg.149_#_2(dist=1457)	scaffold_149	5610	5610	G	A	hom	30
intergenic	gene_8549(dist=1434),gene_8551(dist=1450)	gm1.6886_g(dist=1434),fgenesh1_pg.149_#_2(dist=1450)	scaffold_149	5617	5617	A	T	hom	30
intergenic	gene_8549(dist=1436),gene_8551(dist=1448)	gm1.6886_g(dist=1436),fgenesh1_pg.149_#_2(dist=1448)	scaffold_149	5619	5619	A	G	hom	30
intergenic	gene_8549(dist=1881),gene_8551(dist=1003)	gm1.6886_g(dist=1881),fgenesh1_pg.149_#_2(dist=1003)	scaffold_149	6064	6064	T	C	hom	30
upstream	gene_8551	fgenesh1_pg.149_#_2	scaffold_149	6137	6137	G	A	hom	30
upstream	gene_8551	fgenesh1_pg.149_#_2	scaffold_149	6143	6143	C	T	hom	30
upstream	gene_8551	fgenesh1_pg.149_#_2	scaffold_149	6162	6162	G	A	hom	30
upstream	gene_8551	fgenesh1_pg.149_#_2	scaffold_149	6407	6407	C	T	hom	30
downstream	gene_8558	e_gw1.149.6.1	scaffold_149	20399	20399	C	T	hom	30
exonic	gene_8558	e_gw1.149.6.1	scaffold_149	22248	22248	C	T	hom	30
exonic	gene_8561	fgenesh1_pm.149_#_10	scaffold_149	25331	25331	C	T	hom	30
UTR3	gene_8565	CE85107_1380	scaffold_149	33963	33963	A	G	hom	30
exonic	gene_8566	fgenesh1_pg.149_#_12	scaffold_149	34580	34580	T	C	hom	30
intronic	gene_1826	fgenesh1_kg.15_#_1_#_Locus2178v3rpkm1.13_PRE	scaffold_15	1179	1179	C	T	hom	30
upstream	gene_1828	fgenesh1_pg.15_#_3	scaffold_15	7601	7601	T	A	hom	30
intergenic	gene_1828(dist=1051),gene_1829(dist=1380)	fgenesh1_pg.15_#_3(dist=1051),gw1.15.62.1(dist=1380)	scaffold_15	7731	7731	A	C	hom	30
exonic	gene_1836	fgenesh1_kg.15_#_15_#_Locus7651v1rpkm3.09	scaffold_15	25204	25204	G	A	hom	30
downstream	gene_1838,gene_1839	CE86063_54075,fgenesh1_kg.15_#_19_#_Locus5419v1rpkm10.11	scaffold_15	27882	27882	A	C	hom	30
upstream	gene_1840	fgenesh1_kg.15_#_20_#_Locus2239v1rpkm55.52	scaffold_15	33186	33186	A	G	hom	30
intergenic	gene_1845(dist=1720),gene_1850(dist=4983)	estExt_Genewise1.C_150033(dist=1720),gm1.1480_g(dist=4983)	scaffold_15	43993	43993	G	A	hom	30
intergenic	gene_1845(dist=2207),gene_1850(dist=4496)	estExt_Genewise1.C_150033(dist=2207),gm1.1480_g(dist=4496)	scaffold_15	44480	44480	T	C	hom	30
exonic	gene_1863	e_gw1.15.106.1	scaffold_15	76860	76860	G	A	hom	30
exonic	gene_1869	e_gw1.15.146.1	scaffold_15	90844	90844	T	G	hom	30
exonic	gene_1869	e_gw1.15.146.1	scaffold_15	91123	91123	T	A	hom	30
exonic	gene_1879	estExt_Genemark1.C_150042	scaffold_15	111085	111085	G	A	hom	30
exonic	gene_1880	fgenesh1_kg.15_#_66_#_Locus3346v1rpkm30.03	scaffold_15	116415	116415	G	T	hom	30
exonic	gene_1880	fgenesh1_kg.15_#_66_#_Locus3346v1rpkm30.03	scaffold_15	116502	116502	C	T	hom	30
exonic	gene_1880	fgenesh1_kg.15_#_66_#_Locus3346v1rpkm30.03	scaffold_15	116675	116675	G	C	hom	30
exonic	gene_1881	estExt_Genemark1.C_150044	scaffold_15	118966	118966	G	A	hom	30
exonic	gene_1889	CE87492_242	scaffold_15	139929	139929	A	G	hom	30
upstream	gene_1893,gene_1894	fgenesh1_kg.15_#_77_#_Locus4013v1rpkm21.70,fgenesh1_pm.15_#_36	scaffold_15	148063	148063	G	A	hom	30
exonic	gene_1897	fgenesh1_kg.15_#_81_#_Locus5591v1rpkm9.21	scaffold_15	157123	157123	G	A	hom	30
downstream	gene_1902	CE87862_36	scaffold_15	167812	167812	C	T	hom	30
downstream	gene_1902	CE87862_36	scaffold_15	167814	167814	G	T	hom	30
upstream	gene_1902	CE87862_36	scaffold_15	168797	168797	C	T	hom	30
upstream	gene_1902	CE87862_36	scaffold_15	168848	168848	A	T	hom	30
exonic	gene_1922	e_gw1.15.42.1	scaffold_15	215688	215688	G	A	hom	30
exonic	gene_1922	e_gw1.15.42.1	scaffold_15	215689	215689	G	A	hom	30
exonic	gene_1922	e_gw1.15.42.1	scaffold_15	217462	217462	G	A	hom	30
upstream	gene_1927	estExt_Genewise1Plus.C_150137	scaffold_15	219503	219503	C	T	hom	30
exonic	gene_1928	CE89077_661	scaffold_15	224393	224393	A	G	hom	30
exonic	gene_1928	CE89077_661	scaffold_15	225332	225332	G	A	hom	30
exonic	gene_1928	CE89077_661	scaffold_15	226453	226453	C	T	hom	30
UTR5	gene_8579	fgenesh1_kg.150_#_6_#_Locus814v1rpkm201.41	scaffold_150	9507	9507	A	G	hom	30
upstream	gene_8589	e_gw1.150.57.1	scaffold_150	34833	34833	A	G	hom	30
exonic	gene_8595	fgenesh1_pg.150_#_18	scaffold_150	49568	49568	T	C	hom	30
upstream	gene_8599,gene_8600	estExt_Genemark1.C_1510005,estExt_Genewise1Plus.C_1510010	scaffold_151	12397	12397	T	C	hom	30
exonic	gene_8607	fgenesh1_kg.151_#_17_#_Locus7518v2rpkm1.93	scaffold_151	26631	26631	G	A	hom	30
intronic	gene_8611	fgenesh1_kg.151_#_21_#_Locus8072v1rpkm2.64	scaffold_151	34180	34180	T	C	hom	30
downstream	gene_8618,gene_8619	CE91594_9761,estExt_Genewise1.C_1510056	scaffold_151	47520	47520	T	C	hom	30
downstream	gene_8618,gene_8619	CE91594_9761,estExt_Genewise1.C_1510056	scaffold_151	47521	47521	T	A	hom	30
downstream	gene_8618,gene_8619	CE91594_9761,estExt_Genewise1.C_1510056	scaffold_151	47522	47522	G	A	hom	30
upstream	gene_8622	e_gw1.152.31.1	scaffold_152	6994	6994	T	C	hom	30
exonic	gene_8630	fgenesh1_kg.152_#_9_#_Locus8016v1rpkm2.68	scaffold_152	26163	26163	A	T	hom	30
exonic	gene_8631	fgenesh1_kg.152_#_11_#_Locus3206v1rpkm32.26	scaffold_152	28318	28318	C	G	hom	30
upstream	gene_8674,gene_8675	CE93923_867,estExt_Genewise1Plus.C_1540012	scaffold_154	31205	31205	C	T	hom	30
upstream	gene_8674,gene_8675	CE93923_867,estExt_Genewise1Plus.C_1540012	scaffold_154	31258	31258	C	T	hom	30
upstream	gene_8678,gene_8679	e_gw1.154.14.1,fgenesh1_kg.154_#_14_#_Locus6060v1rpkm7.16	scaffold_154	38918	38918	T	G	hom	30
intergenic	NONE(dist=NONE),gene_8686(dist=2916)	NONE(dist=NONE),e_gw1.155.42.1(dist=2916)	scaffold_155	539	539	C	T	hom	30
intergenic	NONE(dist=NONE),gene_8686(dist=2707)	NONE(dist=NONE),e_gw1.155.42.1(dist=2707)	scaffold_155	748	748	G	A	hom	30
intergenic	NONE(dist=NONE),gene_8686(dist=2651)	NONE(dist=NONE),e_gw1.155.42.1(dist=2651)	scaffold_155	804	804	G	A	hom	30
intergenic	NONE(dist=NONE),gene_8686(dist=2601)	NONE(dist=NONE),e_gw1.155.42.1(dist=2601)	scaffold_155	854	854	C	T	hom	30
intergenic	NONE(dist=NONE),gene_8686(dist=2369)	NONE(dist=NONE),e_gw1.155.42.1(dist=2369)	scaffold_155	1086	1086	G	A	hom	30
UTR3	gene_8700	CE94472_101208	scaffold_155	31864	31864	G	A	hom	30
upstream	gene_8714	fgenesh1_pm.156_#_4	scaffold_156	7903	7903	T	C	hom	30
upstream	gene_8715	e_gw1.156.46.1	scaffold_156	13303	13303	G	A	hom	30
exonic	gene_8715	e_gw1.156.46.1	scaffold_156	16145	16145	A	C	hom	30
exonic	gene_8720	fgenesh1_pm.156_#_10	scaffold_156	26747	26747	G	A	hom	30
exonic	gene_8722	e_gw1.156.45.1	scaffold_156	32562	32562	C	T	hom	30
exonic	gene_8722	e_gw1.156.45.1	scaffold_156	32858	32858	T	C	hom	30
upstream;downstream	gene_8723;gene_8722	e_gw1.156.38.1;e_gw1.156.45.1	scaffold_156	33196	33196	G	C	hom	30
downstream	gene_8727,gene_8728	CE95512_24832,estExt_fgenesh1_pg.C_1560017	scaffold_156	45631	45631	C	T	hom	30
intronic	gene_8729	CE95606_18647	scaffold_157	1805	1805	T	C	hom	30
exonic	gene_8740	fgenesh1_pg.157_#_12	scaffold_157	36420	36420	A	C	hom	30
downstream	gene_8747	gw1.157.37.1	scaffold_157	47405	47405	G	A	hom	30
downstream	gene_8764	gm1.7071_g	scaffold_158	36206	36206	C	T	hom	30
downstream	gene_8770,gene_8771	gm1.7077_g,gm1.7078_g	scaffold_159	6384	6384	T	C	hom	30
intergenic	gene_8789(dist=1448),gene_8790(dist=1866)	fgenesh1_kg.159_#_21_#_Locus7167v1rpkm3.89(dist=1448),e_gw1.159.25.1(dist=1866)	scaffold_159	44325	44325	G	T	hom	30
upstream	gene_8790	e_gw1.159.25.1	scaffold_159	47715	47715	C	A	hom	30
exonic	gene_1943	fgenesh1_pg.16_#_2	scaffold_16	3944	3944	A	G	hom	30
exonic	gene_1943	fgenesh1_pg.16_#_2	scaffold_16	3947	3947	A	G	hom	30
exonic	gene_1943	fgenesh1_pg.16_#_2	scaffold_16	3950	3950	A	G	hom	30
exonic	gene_1946	MIX5178_1073_29	scaffold_16	8694	8694	C	G	hom	30
exonic	gene_1946	MIX5178_1073_29	scaffold_16	10112	10112	T	C	hom	30
upstream	gene_1952,gene_1953	estExt_fgenesh1_pm.C_160007,fgenesh1_pg.16_#_12	scaffold_16	22993	22993	G	A	hom	30
UTR3	gene_1958	CE99967_1569	scaffold_16	32305	32305	C	T	hom	30
exonic	gene_1969	estExt_Genewise1.C_160026	scaffold_16	56464	56464	T	C	hom	30
UTR5	gene_1970	CE100329_36	scaffold_16	57775	57775	A	G	hom	30
intronic	gene_1970	CE100329_36	scaffold_16	57874	57874	T	C	hom	30
exonic	gene_1970	CE100329_36	scaffold_16	58274	58274	A	G	hom	30
exonic	gene_1970	CE100329_36	scaffold_16	58374	58374	T	C	hom	30
downstream	gene_1970,gene_1971	CE100329_36,gm1.1577_g	scaffold_16	58951	58951	T	C	hom	30
downstream	gene_1970,gene_1971	CE100329_36,gm1.1577_g	scaffold_16	59277	59277	A	G	hom	30
downstream	gene_1970,gene_1971	CE100329_36,gm1.1577_g	scaffold_16	59327	59327	T	C	hom	30
exonic	gene_1971	gm1.1577_g	scaffold_16	60094	60094	T	C	hom	30
intergenic	gene_1972(dist=1237),gene_1974(dist=1225)	CE100339_650(dist=1237),fgenesh1_kg.16_#_27_#_Locus5601v1rpkm9.15(dist=1225)	scaffold_16	62977	62977	T	C	hom	30
exonic	gene_1977	gm1.1581_g	scaffold_16	73020	73020	C	A	hom	30
exonic	gene_1984	gm1.1586_g	scaffold_16	87886	87886	G	A	hom	30
exonic	gene_1985	fgenesh1_kg.16_#_39_#_Locus623v1rpkm273.97	scaffold_16	93449	93449	G	C	hom	30
exonic	gene_1985	fgenesh1_kg.16_#_39_#_Locus623v1rpkm273.97	scaffold_16	94419	94419	G	A	hom	30
exonic	gene_1987	fgenesh1_kg.16_#_41_#_Locus4692v1rpkm15.19	scaffold_16	97344	97344	A	G	hom	30
intronic	gene_1994	e_gw1.16.1.1	scaffold_16	116208	116208	A	G	hom	30
exonic	gene_1998	estExt_Genewise1Plus.C_160073	scaffold_16	130954	130954	G	A	hom	30
exonic	gene_2003	MIX5281_24025_56	scaffold_16	145758	145758	T	C	hom	30
exonic	gene_2003	MIX5281_24025_56	scaffold_16	148531	148531	C	T	hom	30
upstream	gene_2038	e_gw1.16.8.1	scaffold_16	233678	233678	T	A	hom	30
exonic	gene_2040	fgenesh1_kg.16_#_100_#_Locus6750v1rpkm4.83	scaffold_16	237685	237685	T	C	hom	30
intergenic	NONE(dist=NONE),gene_8791(dist=1467)	NONE(dist=NONE),fgenesh1_pg.160_#_1(dist=1467)	scaffold_160	67	67	T	C	hom	30
downstream	gene_8791	fgenesh1_pg.160_#_1	scaffold_160	1170	1170	A	G	hom	30
upstream;downstream	gene_8796;gene_8794,gene_8795	estExt_Genewise1.C_1600008;MIX5385_40_100,estExt_Genewise1Plus.C_1600004	scaffold_160	7382	7382	A	G	hom	30
upstream;downstream	gene_8796;gene_8794,gene_8795	estExt_Genewise1.C_1600008;MIX5385_40_100,estExt_Genewise1Plus.C_1600004	scaffold_160	7383	7383	C	T	hom	30
upstream;downstream	gene_8796;gene_8794,gene_8795	estExt_Genewise1.C_1600008;MIX5385_40_100,estExt_Genewise1Plus.C_1600004	scaffold_160	7384	7384	A	G	hom	30
exonic	gene_8796	estExt_Genewise1.C_1600008	scaffold_160	8346	8346	T	C	hom	30
intronic	gene_8796	estExt_Genewise1.C_1600008	scaffold_160	8665	8665	A	G	hom	30
upstream	gene_8806	e_gw1.160.20.1	scaffold_160	32537	32537	A	G	hom	30
upstream	gene_8806	e_gw1.160.20.1	scaffold_160	32538	32538	G	A	hom	30
exonic	gene_8808	e_gw1.160.17.1	scaffold_160	38353	38353	C	G	hom	30
upstream	gene_8808	e_gw1.160.17.1	scaffold_160	38491	38491	T	C	hom	30
exonic	gene_8813	fgenesh1_kg.161_#_1_#_Locus2448v1rpkm48.44	scaffold_161	1494	1494	T	C	hom	30
downstream	gene_8817,gene_8818	estExt_Genewise1.C_1610013,estExt_fgenesh1_pg.C_1610006	scaffold_161	14100	14100	C	T	hom	30
downstream	gene_8827,gene_8828	e_gw1.161.29.1,fgenesh1_kg.161_#_19_#_Locus4673v1rpkm15.30	scaffold_161	30145	30145	C	T	hom	30
intergenic	gene_8828(dist=1557),gene_8829(dist=3110)	fgenesh1_kg.161_#_19_#_Locus4673v1rpkm15.30(dist=1557),e_gw1.161.30.1(dist=3110)	scaffold_161	33495	33495	C	G	hom	30
exonic	gene_8831	fgenesh1_pg.161_#_16	scaffold_161	40245	40245	C	T	hom	30
UTR5	gene_8832	fgenesh1_kg.161_#_24_#_Locus5025v1rpkm12.51	scaffold_161	42823	42823	C	T	hom	30
upstream;downstream	gene_8842;gene_8841	MIX5510_60_87;fgenesh1_kg.162_#_8_#_Locus7140v1rpkm3.94	scaffold_162	19752	19752	C	T	hom	30
intergenic	gene_8842(dist=1024),gene_8843(dist=1075)	MIX5510_60_87(dist=1024),fgenesh1_kg.162_#_13_#_Locus648v1rpkm262.38(dist=1075)	scaffold_162	22260	22260	G	C	hom	30
exonic	gene_8844	e_gw1.162.29.1	scaffold_162	29203	29203	G	T	hom	30
exonic	gene_8844	e_gw1.162.29.1	scaffold_162	29768	29768	A	G	hom	30
intergenic	gene_8854(dist=1223),NONE(dist=NONE)	CE106067_10(dist=1223),NONE(dist=NONE)	scaffold_162	48265	48265	G	T	hom	30
intergenic	gene_8854(dist=1228),NONE(dist=NONE)	CE106067_10(dist=1228),NONE(dist=NONE)	scaffold_162	48270	48270	G	A	hom	30
intronic	gene_8856	fgenesh1_pm.163_#_2	scaffold_163	6733	6733	A	G	hom	30
downstream	gene_8898	estExt_Genemark1.C_1640017	scaffold_164	44601	44601	G	A	hom	30
exonic	gene_8901	estExt_fgenesh1_pg.C_1650003	scaffold_165	4079	4079	T	A	hom	30
exonic	gene_8901	estExt_fgenesh1_pg.C_1650003	scaffold_165	4080	4080	T	C	hom	30
UTR3	gene_8915	estExt_Genewise1Plus.C_1650033	scaffold_165	28476	28476	G	A	hom	30
UTR5	gene_8954	fgenesh1_kg.167_#_6_#_Locus2995v1rpkm35.92	scaffold_167	15314	15314	G	A	hom	30
upstream;downstream	gene_8960;gene_8959	estExt_Genewise1.C_1670024;fgenesh1_kg.167_#_11_#_Locus2285v1rpkm53.52	scaffold_167	23720	23720	C	A	hom	30
upstream;downstream	gene_8960;gene_8959	estExt_Genewise1.C_1670024;fgenesh1_kg.167_#_11_#_Locus2285v1rpkm53.52	scaffold_167	23722	23722	G	A	hom	30
upstream;downstream	gene_8960;gene_8959	estExt_Genewise1.C_1670024;fgenesh1_kg.167_#_11_#_Locus2285v1rpkm53.52	scaffold_167	23728	23728	T	A	hom	30
upstream;downstream	gene_8960;gene_8959	estExt_Genewise1.C_1670024;fgenesh1_kg.167_#_11_#_Locus2285v1rpkm53.52	scaffold_167	23729	23729	T	A	hom	30
upstream;downstream	gene_8960;gene_8959	estExt_Genewise1.C_1670024;fgenesh1_kg.167_#_11_#_Locus2285v1rpkm53.52	scaffold_167	23730	23730	C	A	hom	30
upstream;downstream	gene_8960;gene_8959	estExt_Genewise1.C_1670024;fgenesh1_kg.167_#_11_#_Locus2285v1rpkm53.52	scaffold_167	23733	23733	G	A	hom	30
upstream;downstream	gene_8960;gene_8959	estExt_Genewise1.C_1670024;fgenesh1_kg.167_#_11_#_Locus2285v1rpkm53.52	scaffold_167	23734	23734	G	A	hom	30
upstream;downstream	gene_8960;gene_8959	estExt_Genewise1.C_1670024;fgenesh1_kg.167_#_11_#_Locus2285v1rpkm53.52	scaffold_167	23735	23735	T	A	hom	30
upstream;downstream	gene_8960;gene_8959	estExt_Genewise1.C_1670024;fgenesh1_kg.167_#_11_#_Locus2285v1rpkm53.52	scaffold_167	23736	23736	G	A	hom	30
upstream;downstream	gene_8960;gene_8959	estExt_Genewise1.C_1670024;fgenesh1_kg.167_#_11_#_Locus2285v1rpkm53.52	scaffold_167	23737	23737	T	A	hom	30
upstream;downstream	gene_8960;gene_8959	estExt_Genewise1.C_1670024;fgenesh1_kg.167_#_11_#_Locus2285v1rpkm53.52	scaffold_167	23739	23739	G	A	hom	30
upstream;downstream	gene_8960;gene_8959	estExt_Genewise1.C_1670024;fgenesh1_kg.167_#_11_#_Locus2285v1rpkm53.52	scaffold_167	23740	23740	G	A	hom	30
upstream;downstream	gene_8960;gene_8959	estExt_Genewise1.C_1670024;fgenesh1_kg.167_#_11_#_Locus2285v1rpkm53.52	scaffold_167	23753	23753	C	A	hom	30
intronic	gene_8960	estExt_Genewise1.C_1670024	scaffold_167	24690	24690	C	T	hom	30
exonic	gene_8960	estExt_Genewise1.C_1670024	scaffold_167	25942	25942	G	A	hom	30
exonic	gene_8961	fgenesh1_kg.167_#_13_#_Locus2902v1rpkm37.85	scaffold_167	30090	30090	T	C	hom	30
intronic	gene_8967	estExt_fgenesh1_pm.C_1670013	scaffold_167	39219	39219	T	C	hom	30
exonic	gene_8976	fgenesh1_pm.168_#_8	scaffold_168	21374	21374	T	C	hom	30
upstream	gene_8984	fgenesh1_kg.168_#_17_#_Locus2798v1rpkm39.90	scaffold_168	45349	45349	A	G	hom	30
intronic	gene_8991	gm1.7264_g	scaffold_169	16359	16359	G	A	hom	30
intronic	gene_8991	gm1.7264_g	scaffold_169	16367	16367	A	G	hom	30
intronic	gene_8991	gm1.7264_g	scaffold_169	16369	16369	G	A	hom	30
intronic	gene_8991	gm1.7264_g	scaffold_169	16377	16377	G	A	hom	30
intronic	gene_8991	gm1.7264_g	scaffold_169	16401	16401	G	A	hom	30
intronic	gene_8991	gm1.7264_g	scaffold_169	16406	16406	T	C	hom	30
exonic	gene_8998	e_gw1.169.27.1	scaffold_169	30756	30756	A	G	hom	30
intergenic	gene_9000(dist=2114),gene_9002(dist=1331)	estExt_Genewise1Plus.C_1690029(dist=2114),fgenesh1_kg.169_#_28_#_Locus1352v3rpkm1.40_PRE(dist=1331)	scaffold_169	37554	37554	A	G	hom	30
intergenic	gene_9000(dist=2120),gene_9002(dist=1325)	estExt_Genewise1Plus.C_1690029(dist=2120),fgenesh1_kg.169_#_28_#_Locus1352v3rpkm1.40_PRE(dist=1325)	scaffold_169	37560	37560	A	G	hom	30
intergenic	gene_9000(dist=2129),gene_9002(dist=1316)	estExt_Genewise1Plus.C_1690029(dist=2129),fgenesh1_kg.169_#_28_#_Locus1352v3rpkm1.40_PRE(dist=1316)	scaffold_169	37569	37569	C	G	hom	30
intergenic	gene_9000(dist=2133),gene_9002(dist=1312)	estExt_Genewise1Plus.C_1690029(dist=2133),fgenesh1_kg.169_#_28_#_Locus1352v3rpkm1.40_PRE(dist=1312)	scaffold_169	37573	37573	A	G	hom	30
intergenic	gene_9000(dist=2146),gene_9002(dist=1299)	estExt_Genewise1Plus.C_1690029(dist=2146),fgenesh1_kg.169_#_28_#_Locus1352v3rpkm1.40_PRE(dist=1299)	scaffold_169	37586	37586	A	G	hom	30
intergenic	gene_9000(dist=2163),gene_9002(dist=1282)	estExt_Genewise1Plus.C_1690029(dist=2163),fgenesh1_kg.169_#_28_#_Locus1352v3rpkm1.40_PRE(dist=1282)	scaffold_169	37603	37603	C	T	hom	30
intergenic	gene_9000(dist=2167),gene_9002(dist=1278)	estExt_Genewise1Plus.C_1690029(dist=2167),fgenesh1_kg.169_#_28_#_Locus1352v3rpkm1.40_PRE(dist=1278)	scaffold_169	37607	37607	C	T	hom	30
intergenic	gene_9000(dist=2176),gene_9002(dist=1269)	estExt_Genewise1Plus.C_1690029(dist=2176),fgenesh1_kg.169_#_28_#_Locus1352v3rpkm1.40_PRE(dist=1269)	scaffold_169	37616	37616	C	G	hom	30
intergenic	gene_9000(dist=2184),gene_9002(dist=1261)	estExt_Genewise1Plus.C_1690029(dist=2184),fgenesh1_kg.169_#_28_#_Locus1352v3rpkm1.40_PRE(dist=1261)	scaffold_169	37624	37624	A	G	hom	30
exonic	gene_9005	estExt_fgenesh1_pg.C_1690016	scaffold_169	43380	43380	A	G	hom	30
intronic	gene_2048	estExt_fgenesh1_pm.C_170002	scaffold_17	4053	4053	T	C	hom	30
downstream	gene_2050	fgenesh1_pm.17_#_3	scaffold_17	9396	9396	C	T	hom	30
UTR3	gene_2056	estExt_Genewise1.C_170020	scaffold_17	23453	23453	T	C	hom	30
intergenic	gene_2059(dist=3462),gene_2061(dist=1432)	CE111990_10982(dist=3462),gm1.1656_g(dist=1432)	scaffold_17	34717	34717	G	A	hom	30
exonic	gene_2067	estExt_fgenesh1_pm.C_170014	scaffold_17	49728	49728	C	T	hom	30
exonic	gene_2075	CE112193_2211	scaffold_17	63661	63661	C	A	hom	30
UTR5	gene_2077	CE112262_600	scaffold_17	67552	67552	G	C	hom	30
upstream	gene_2081	estExt_fgenesh1_pg.C_170030	scaffold_17	76234	76234	T	C	hom	30
upstream	gene_2104	estExt_Genewise1.C_170072	scaffold_17	109285	109285	A	T	hom	30
exonic	gene_2105	gm1.1685_g	scaffold_17	112858	112858	T	C	hom	30
upstream;downstream	gene_2109;gene_2110	fgenesh1_pg.17_#_46;fgenesh1_pm.17_#_32	scaffold_17	123535	123535	G	A	hom	30
exonic	gene_2128	gm1.1706_g	scaffold_17	161661	161661	C	G	hom	30
exonic	gene_2128	gm1.1706_g	scaffold_17	162045	162045	A	G	hom	30
upstream;downstream	gene_2135;gene_2134	fgenesh1_kg.17_#_74_#_Locus5107v1rpkm11.99;estExt_Genewise1Plus.C_170132	scaffold_17	178358	178358	A	G	hom	30
upstream	gene_2142	CE114550_739	scaffold_17	194409	194409	A	G	hom	30
UTR5	gene_2155	CE114894_4189	scaffold_17	218032	218032	A	G	hom	30
exonic	gene_2158	fgenesh1_kg.17_#_104_#_Locus3926v1rpkm22.56	scaffold_17	224990	224990	C	T	hom	30
exonic	gene_2164	fgenesh1_kg.17_#_112_#_Locus594v1rpkm288.60	scaffold_17	245692	245692	A	C	hom	30
upstream	gene_2164	fgenesh1_kg.17_#_112_#_Locus594v1rpkm288.60	scaffold_17	246704	246704	A	G	hom	30
upstream	gene_9028	e_gw1.171.16.1	scaffold_171	57	57	G	A	hom	30
exonic	gene_9030	estExt_Genewise1Plus.C_1710006	scaffold_171	7881	7881	G	T	hom	30
exonic	gene_9033	CE116824_20432	scaffold_171	17493	17493	C	T	hom	30
upstream	gene_9033,gene_9034	CE116824_20432,estExt_Genemark1.C_1710006	scaffold_171	18527	18527	C	G	hom	30
intronic	gene_9041	estExt_fgenesh1_pm.C_1710010	scaffold_171	37169	37169	T	C	hom	30
exonic	gene_9045	fgenesh1_pg.172_#_1	scaffold_172	934	934	C	A	hom	30
exonic	gene_9056	estExt_Genewise1Plus.C_1720023	scaffold_172	25700	25700	G	A	hom	30
upstream;downstream	gene_9068;gene_9069	e_gw1.173.30.1;CE118096_12350	scaffold_173	12613	12613	T	C	hom	30
UTR3	gene_9074	fgenesh1_kg.173_#_10_#_Locus11503v1rpkm1.04	scaffold_173	35465	35465	A	C	hom	30
exonic	gene_9093	fgenesh1_kg.174_#_13_#_Locus4600v1rpkm16.05	scaffold_174	34583	34583	C	G	hom	30
upstream	gene_9098	CE119298_3118	scaffold_175	223	223	C	T	hom	30
exonic	gene_9103	estExt_fgenesh1_pg.C_1750006	scaffold_175	10551	10551	G	A	hom	30
exonic	gene_9144	estExt_fgenesh1_pm.C_1770007	scaffold_177	22113	22113	G	A	hom	30
exonic	gene_9147	estExt_Genewise1Plus.C_1770032	scaffold_177	31865	31865	G	C	hom	30
exonic	gene_9152	fgenesh1_kg.178_#_4_#_Locus299v1rpkm609.83	scaffold_178	7966	7966	A	G	hom	30
exonic	gene_9159	estExt_Genemark1.C_1780010	scaffold_178	30000	30000	G	A	hom	30
intergenic	gene_9159(dist=2688),gene_9160(dist=2054)	estExt_Genemark1.C_1780010(dist=2688),CE121570_2452(dist=2054)	scaffold_178	32964	32964	T	C	hom	30
exonic	gene_9168	e_gw1.179.18.1	scaffold_179	14759	14759	G	A	hom	30
downstream	gene_9168,gene_9169	e_gw1.179.18.1,e_gw1.179.32.1	scaffold_179	19176	19176	A	C	hom	30
exonic	gene_2166	CE122932_298	scaffold_18	2780	2780	G	A	hom	30
upstream	gene_2170,gene_2171	estExt_Genewise1Plus.C_180007,fgenesh1_pg.18_#_6	scaffold_18	12073	12073	G	T	hom	30
exonic	gene_2171	estExt_Genewise1Plus.C_180007	scaffold_18	14536	14536	A	G	hom	30
downstream	gene_2174	fgenesh1_kg.18_#_9_#_Locus16505v1rpkm0.16	scaffold_18	19124	19124	G	T	hom	30
downstream	gene_2174	fgenesh1_kg.18_#_9_#_Locus16505v1rpkm0.16	scaffold_18	19126	19126	G	T	hom	30
downstream	gene_2174	fgenesh1_kg.18_#_9_#_Locus16505v1rpkm0.16	scaffold_18	19127	19127	A	T	hom	30
downstream	gene_2174	fgenesh1_kg.18_#_9_#_Locus16505v1rpkm0.16	scaffold_18	19129	19129	A	T	hom	30
downstream	gene_2174	fgenesh1_kg.18_#_9_#_Locus16505v1rpkm0.16	scaffold_18	19130	19130	A	T	hom	30
downstream	gene_2174	fgenesh1_kg.18_#_9_#_Locus16505v1rpkm0.16	scaffold_18	19132	19132	A	T	hom	30
downstream	gene_2174	fgenesh1_kg.18_#_9_#_Locus16505v1rpkm0.16	scaffold_18	19134	19134	C	T	hom	30
downstream	gene_2174	fgenesh1_kg.18_#_9_#_Locus16505v1rpkm0.16	scaffold_18	19135	19135	A	T	hom	30
downstream	gene_2174	fgenesh1_kg.18_#_9_#_Locus16505v1rpkm0.16	scaffold_18	19137	19137	C	G	hom	30
downstream	gene_2174	fgenesh1_kg.18_#_9_#_Locus16505v1rpkm0.16	scaffold_18	19138	19138	C	T	hom	30
downstream	gene_2174	fgenesh1_kg.18_#_9_#_Locus16505v1rpkm0.16	scaffold_18	19139	19139	G	T	hom	30
downstream	gene_2174	fgenesh1_kg.18_#_9_#_Locus16505v1rpkm0.16	scaffold_18	19146	19146	A	G	hom	30
downstream	gene_2174	fgenesh1_kg.18_#_9_#_Locus16505v1rpkm0.16	scaffold_18	19149	19149	C	T	hom	30
downstream	gene_2174	fgenesh1_kg.18_#_9_#_Locus16505v1rpkm0.16	scaffold_18	19150	19150	C	T	hom	30
downstream	gene_2174	fgenesh1_kg.18_#_9_#_Locus16505v1rpkm0.16	scaffold_18	19155	19155	C	T	hom	30
downstream	gene_2174	fgenesh1_kg.18_#_9_#_Locus16505v1rpkm0.16	scaffold_18	19171	19171	T	G	hom	30
upstream	gene_2176	estExt_Genemark1.C_180009	scaffold_18	23522	23522	T	G	hom	30
exonic	gene_2184	fgenesh1_pm.18_#_8	scaffold_18	38803	38803	G	A	hom	30
upstream	gene_2197	estExt_fgenesh1_pg.C_180028	scaffold_18	73632	73632	G	A	hom	30
downstream	gene_2199,gene_2200	estExt_fgenesh1_pg.C_180029,fgenesh1_pg.18_#_31	scaffold_18	76249	76249	C	T	hom	30
upstream	gene_2205	fgenesh1_kg.18_#_38_#_Locus15001v1rpkm0.42	scaffold_18	87543	87543	A	G	hom	30
intronic	gene_2206	fgenesh1_pm.18_#_18	scaffold_18	95035	95035	A	G	hom	30
exonic	gene_2212	CE124261_57474	scaffold_18	111339	111339	G	A	hom	30
exonic	gene_2212	CE124261_57474	scaffold_18	111458	111458	T	G	hom	30
exonic	gene_2212	CE124261_57474	scaffold_18	111972	111972	A	C	hom	30
exonic	gene_2213	estExt_fgenesh1_pm.C_180023	scaffold_18	113420	113420	A	T	hom	30
exonic	gene_2217	e_gw1.18.6.1	scaffold_18	121868	121868	C	A	hom	30
upstream	gene_2224	fgenesh1_kg.18_#_60_#_Locus4091v1rpkm20.97	scaffold_18	134729	134729	C	T	hom	30
upstream	gene_2224	fgenesh1_kg.18_#_60_#_Locus4091v1rpkm20.97	scaffold_18	134734	134734	C	T	hom	30
downstream	gene_2224	fgenesh1_kg.18_#_60_#_Locus4091v1rpkm20.97	scaffold_18	136495	136495	A	T	hom	30
downstream	gene_2224	fgenesh1_kg.18_#_60_#_Locus4091v1rpkm20.97	scaffold_18	136496	136496	T	C	hom	30
UTR3	gene_2254	fgenesh1_kg.18_#_91_#_Locus13257v2rpkm0.00_PRE	scaffold_18	207404	207404	T	G	hom	30
UTR3	gene_2254	fgenesh1_kg.18_#_91_#_Locus13257v2rpkm0.00_PRE	scaffold_18	207406	207406	A	G	hom	30
UTR3	gene_2254	fgenesh1_kg.18_#_91_#_Locus13257v2rpkm0.00_PRE	scaffold_18	207407	207407	T	G	hom	30
UTR3	gene_2254	fgenesh1_kg.18_#_91_#_Locus13257v2rpkm0.00_PRE	scaffold_18	207408	207408	T	G	hom	30
UTR3	gene_2254	fgenesh1_kg.18_#_91_#_Locus13257v2rpkm0.00_PRE	scaffold_18	207409	207409	A	G	hom	30
UTR3	gene_2254	fgenesh1_kg.18_#_91_#_Locus13257v2rpkm0.00_PRE	scaffold_18	207410	207410	A	G	hom	30
UTR3	gene_2254	fgenesh1_kg.18_#_91_#_Locus13257v2rpkm0.00_PRE	scaffold_18	207411	207411	A	G	hom	30
UTR3	gene_2254	fgenesh1_kg.18_#_91_#_Locus13257v2rpkm0.00_PRE	scaffold_18	207412	207412	A	G	hom	30
UTR3	gene_2254	fgenesh1_kg.18_#_91_#_Locus13257v2rpkm0.00_PRE	scaffold_18	207414	207414	A	G	hom	30
UTR3	gene_2254	fgenesh1_kg.18_#_91_#_Locus13257v2rpkm0.00_PRE	scaffold_18	207415	207415	A	G	hom	30
UTR3	gene_2254	fgenesh1_kg.18_#_91_#_Locus13257v2rpkm0.00_PRE	scaffold_18	207417	207417	T	G	hom	30
UTR3	gene_2254	fgenesh1_kg.18_#_91_#_Locus13257v2rpkm0.00_PRE	scaffold_18	207418	207418	A	T	hom	30
UTR3	gene_2254	fgenesh1_kg.18_#_91_#_Locus13257v2rpkm0.00_PRE	scaffold_18	207419	207419	C	T	hom	30
UTR3	gene_2254	fgenesh1_kg.18_#_91_#_Locus13257v2rpkm0.00_PRE	scaffold_18	207425	207425	T	A	hom	30
UTR3	gene_2254	fgenesh1_kg.18_#_91_#_Locus13257v2rpkm0.00_PRE	scaffold_18	207435	207435	C	A	hom	30
UTR3	gene_2254	fgenesh1_kg.18_#_91_#_Locus13257v2rpkm0.00_PRE	scaffold_18	207436	207436	C	A	hom	30
UTR3	gene_2254	fgenesh1_kg.18_#_91_#_Locus13257v2rpkm0.00_PRE	scaffold_18	207445	207445	C	T	hom	30
UTR3	gene_2254	fgenesh1_kg.18_#_91_#_Locus13257v2rpkm0.00_PRE	scaffold_18	207449	207449	A	G	hom	30
UTR3	gene_2254	fgenesh1_kg.18_#_91_#_Locus13257v2rpkm0.00_PRE	scaffold_18	207450	207450	A	T	hom	30
exonic	gene_9181	CE127013_6871	scaffold_180	7349	7349	C	T	hom	30
exonic	gene_9187	estExt_Genemark1.C_1800007	scaffold_180	19556	19556	G	A	hom	30
upstream	gene_9197	CE127539_4660	scaffold_180	39214	39214	C	G	hom	30
UTR5	gene_9198	CE127594_81864	scaffold_181	451	451	A	G	hom	30
exonic	gene_9198	CE127594_81864	scaffold_181	660	660	T	G	hom	30
exonic	gene_9198	CE127594_81864	scaffold_181	661	661	C	T	hom	30
exonic	gene_9205	CE127746_6449	scaffold_181	13192	13192	G	C	hom	30
upstream;downstream	gene_9219;gene_9220	fgenesh1_kg.182_#_3_#_Locus42v2rpkm10.25_PRE;fgenesh1_kg.182_#_4_#_Locus2948v1rpkm37.05	scaffold_182	4169	4169	A	C	hom	30
upstream;downstream	gene_9219;gene_9220	fgenesh1_kg.182_#_3_#_Locus42v2rpkm10.25_PRE;fgenesh1_kg.182_#_4_#_Locus2948v1rpkm37.05	scaffold_182	4171	4171	A	C	hom	30
upstream;downstream	gene_9219;gene_9220	fgenesh1_kg.182_#_3_#_Locus42v2rpkm10.25_PRE;fgenesh1_kg.182_#_4_#_Locus2948v1rpkm37.05	scaffold_182	4177	4177	A	G	hom	30
upstream;downstream	gene_9219;gene_9220	fgenesh1_kg.182_#_3_#_Locus42v2rpkm10.25_PRE;fgenesh1_kg.182_#_4_#_Locus2948v1rpkm37.05	scaffold_182	4178	4178	A	G	hom	30
upstream;downstream	gene_9219;gene_9220	fgenesh1_kg.182_#_3_#_Locus42v2rpkm10.25_PRE;fgenesh1_kg.182_#_4_#_Locus2948v1rpkm37.05	scaffold_182	4179	4179	A	G	hom	30
upstream;downstream	gene_9219;gene_9220	fgenesh1_kg.182_#_3_#_Locus42v2rpkm10.25_PRE;fgenesh1_kg.182_#_4_#_Locus2948v1rpkm37.05	scaffold_182	4180	4180	A	C	hom	30
upstream;downstream	gene_9219;gene_9220	fgenesh1_kg.182_#_3_#_Locus42v2rpkm10.25_PRE;fgenesh1_kg.182_#_4_#_Locus2948v1rpkm37.05	scaffold_182	4182	4182	A	C	hom	30
upstream;downstream	gene_9219;gene_9220	fgenesh1_kg.182_#_3_#_Locus42v2rpkm10.25_PRE;fgenesh1_kg.182_#_4_#_Locus2948v1rpkm37.05	scaffold_182	4183	4183	A	G	hom	30
upstream;downstream	gene_9219;gene_9220	fgenesh1_kg.182_#_3_#_Locus42v2rpkm10.25_PRE;fgenesh1_kg.182_#_4_#_Locus2948v1rpkm37.05	scaffold_182	4184	4184	A	G	hom	30
upstream;downstream	gene_9219;gene_9220	fgenesh1_kg.182_#_3_#_Locus42v2rpkm10.25_PRE;fgenesh1_kg.182_#_4_#_Locus2948v1rpkm37.05	scaffold_182	4189	4189	A	T	hom	30
upstream;downstream	gene_9219;gene_9220	fgenesh1_kg.182_#_3_#_Locus42v2rpkm10.25_PRE;fgenesh1_kg.182_#_4_#_Locus2948v1rpkm37.05	scaffold_182	4190	4190	A	T	hom	30
downstream	gene_9235,gene_9236	CE129017_218,MIX6738_36_99	scaffold_182	28757	28757	G	A	hom	30
downstream	gene_9237	CE129022_42	scaffold_182	32842	32842	C	A	hom	30
intergenic	gene_10019(dist=3352),NONE(dist=NONE)	fgenesh1_kg.183_#_1_#_Locus14545v2rpkm0.31(dist=3352),NONE(dist=NONE)	scaffold_183	6737	6737	C	T	hom	30
intergenic	gene_10019(dist=8176),NONE(dist=NONE)	fgenesh1_kg.183_#_1_#_Locus14545v2rpkm0.31(dist=8176),NONE(dist=NONE)	scaffold_183	11561	11561	G	A	hom	30
intergenic	gene_10019(dist=15569),NONE(dist=NONE)	fgenesh1_kg.183_#_1_#_Locus14545v2rpkm0.31(dist=15569),NONE(dist=NONE)	scaffold_183	18954	18954	C	T	hom	30
intergenic	gene_10019(dist=16371),NONE(dist=NONE)	fgenesh1_kg.183_#_1_#_Locus14545v2rpkm0.31(dist=16371),NONE(dist=NONE)	scaffold_183	19756	19756	G	A	hom	30
intergenic	gene_10019(dist=20267),NONE(dist=NONE)	fgenesh1_kg.183_#_1_#_Locus14545v2rpkm0.31(dist=20267),NONE(dist=NONE)	scaffold_183	23652	23652	C	A	hom	30
intergenic	gene_10019(dist=20270),NONE(dist=NONE)	fgenesh1_kg.183_#_1_#_Locus14545v2rpkm0.31(dist=20270),NONE(dist=NONE)	scaffold_183	23655	23655	T	G	hom	30
intergenic	gene_10019(dist=20404),NONE(dist=NONE)	fgenesh1_kg.183_#_1_#_Locus14545v2rpkm0.31(dist=20404),NONE(dist=NONE)	scaffold_183	23789	23789	T	C	hom	30
intergenic	gene_10019(dist=20407),NONE(dist=NONE)	fgenesh1_kg.183_#_1_#_Locus14545v2rpkm0.31(dist=20407),NONE(dist=NONE)	scaffold_183	23792	23792	G	A	hom	30
intergenic	gene_10019(dist=20465),NONE(dist=NONE)	fgenesh1_kg.183_#_1_#_Locus14545v2rpkm0.31(dist=20465),NONE(dist=NONE)	scaffold_183	23850	23850	T	C	hom	30
intergenic	gene_10019(dist=20472),NONE(dist=NONE)	fgenesh1_kg.183_#_1_#_Locus14545v2rpkm0.31(dist=20472),NONE(dist=NONE)	scaffold_183	23857	23857	A	G	hom	30
intergenic	gene_10019(dist=22934),NONE(dist=NONE)	fgenesh1_kg.183_#_1_#_Locus14545v2rpkm0.31(dist=22934),NONE(dist=NONE)	scaffold_183	26319	26319	T	A	hom	30
intergenic	gene_10019(dist=32490),NONE(dist=NONE)	fgenesh1_kg.183_#_1_#_Locus14545v2rpkm0.31(dist=32490),NONE(dist=NONE)	scaffold_183	35875	35875	A	G	hom	30
intergenic	gene_10019(dist=32496),NONE(dist=NONE)	fgenesh1_kg.183_#_1_#_Locus14545v2rpkm0.31(dist=32496),NONE(dist=NONE)	scaffold_183	35881	35881	A	G	hom	30
intergenic	gene_10019(dist=32560),NONE(dist=NONE)	fgenesh1_kg.183_#_1_#_Locus14545v2rpkm0.31(dist=32560),NONE(dist=NONE)	scaffold_183	35945	35945	C	T	hom	30
intergenic	gene_10019(dist=32685),NONE(dist=NONE)	fgenesh1_kg.183_#_1_#_Locus14545v2rpkm0.31(dist=32685),NONE(dist=NONE)	scaffold_183	36070	36070	G	T	hom	30
intergenic	gene_10019(dist=32759),NONE(dist=NONE)	fgenesh1_kg.183_#_1_#_Locus14545v2rpkm0.31(dist=32759),NONE(dist=NONE)	scaffold_183	36144	36144	C	T	hom	30
intergenic	gene_10019(dist=32814),NONE(dist=NONE)	fgenesh1_kg.183_#_1_#_Locus14545v2rpkm0.31(dist=32814),NONE(dist=NONE)	scaffold_183	36199	36199	G	A	hom	30
intergenic	gene_10019(dist=33835),NONE(dist=NONE)	fgenesh1_kg.183_#_1_#_Locus14545v2rpkm0.31(dist=33835),NONE(dist=NONE)	scaffold_183	37220	37220	C	T	hom	30
intronic	gene_9242	fgenesh1_kg.184_#_1_#_Locus5457v1rpkm9.94	scaffold_184	1706	1706	G	A	hom	30
upstream	gene_9242	fgenesh1_kg.184_#_1_#_Locus5457v1rpkm9.94	scaffold_184	3154	3154	G	A	hom	30
upstream	gene_9242	fgenesh1_kg.184_#_1_#_Locus5457v1rpkm9.94	scaffold_184	3155	3155	T	A	hom	30
intergenic	gene_9242(dist=2746),gene_9243(dist=1565)	fgenesh1_kg.184_#_1_#_Locus5457v1rpkm9.94(dist=2746),fgenesh1_pg.184_#_2(dist=1565)	scaffold_184	5186	5186	T	C	hom	30
exonic	gene_9248	fgenesh1_kg.184_#_8_#_Locus3007v2rpkm31.20	scaffold_184	23949	23949	C	T	hom	30
exonic	gene_9249	fgenesh1_kg.184_#_11_#_Locus1362v1rpkm107.71	scaffold_184	25431	25431	C	T	hom	30
exonic	gene_9249	fgenesh1_kg.184_#_11_#_Locus1362v1rpkm107.71	scaffold_184	27165	27165	C	T	hom	30
exonic	gene_9255	CE129533_99577	scaffold_185	4165	4165	G	T	hom	30
exonic	gene_9255	CE129533_99577	scaffold_185	4166	4166	C	T	hom	30
exonic	gene_9255	CE129533_99577	scaffold_185	4167	4167	G	T	hom	30
exonic	gene_9255	CE129533_99577	scaffold_185	4168	4168	A	T	hom	30
exonic	gene_9255	CE129533_99577	scaffold_185	4169	4169	G	T	hom	30
exonic	gene_9255	CE129533_99577	scaffold_185	4171	4171	A	T	hom	30
exonic	gene_9255	CE129533_99577	scaffold_185	4173	4173	C	T	hom	30
exonic	gene_9255	CE129533_99577	scaffold_185	4175	4175	G	T	hom	30
exonic	gene_9255	CE129533_99577	scaffold_185	4176	4176	G	T	hom	30
exonic	gene_9255	CE129533_99577	scaffold_185	4188	4188	C	T	hom	30
exonic	gene_9255	CE129533_99577	scaffold_185	4189	4189	A	T	hom	30
exonic	gene_9255	CE129533_99577	scaffold_185	4190	4190	G	T	hom	30
exonic	gene_9255	CE129533_99577	scaffold_185	4191	4191	A	T	hom	30
exonic	gene_9255	CE129533_99577	scaffold_185	4193	4193	G	T	hom	30
exonic	gene_9255	CE129533_99577	scaffold_185	4199	4199	G	T	hom	30
downstream	gene_9268	fgenesh1_pm.185_#_9	scaffold_185	25012	25012	A	T	hom	30
exonic	gene_9268	fgenesh1_pm.185_#_9	scaffold_185	25420	25420	T	G	hom	30
intronic	gene_9268	fgenesh1_pm.185_#_9	scaffold_185	26315	26315	A	G	hom	30
intronic	gene_9268	fgenesh1_pm.185_#_9	scaffold_185	26320	26320	A	G	hom	30
upstream	gene_9289	gm1.7503_g	scaffold_186	35730	35730	T	G	hom	30
upstream	gene_9290	fgenesh1_pg.187_#_1	scaffold_187	2043	2043	G	C	hom	30
upstream;downstream	gene_9299,gene_9300;gene_9298	gm1.7511_g,gm1.7512_g;estExt_Genewise1Plus.C_1870023	scaffold_187	21403	21403	A	G	hom	30
intronic	gene_9302	estExt_fgenesh1_pm.C_1870010	scaffold_187	25017	25017	T	C	hom	30
exonic	gene_9303	estExt_Genemark1.C_1870013	scaffold_187	25966	25966	C	T	hom	30
UTR3	gene_9304	estExt_Genewise1Plus.C_1870028	scaffold_187	28055	28055	T	C	hom	30
UTR5	gene_9305	estExt_Genemark1.C_1870015	scaffold_187	30340	30340	A	C	hom	30
upstream	gene_9306	estExt_Genewise1.C_1870029	scaffold_187	31781	31781	C	T	hom	30
intergenic	gene_9306(dist=1278),NONE(dist=NONE)	estExt_Genewise1.C_1870029(dist=1278),NONE(dist=NONE)	scaffold_187	36192	36192	C	T	hom	30
exonic	gene_9307	estExt_Genemark1.C_1880001	scaffold_188	1038	1038	G	T	hom	30
exonic	gene_9308	estExt_Genemark1.C_1880002,fgenesh1_kg.188_#_2_#_Locus6469v1rpkm5.71	scaffold_188	3236	3236	C	T	hom	30
exonic	gene_9311	fgenesh1_kg.188_#_5_#_Locus8490v1rpkm2.29	scaffold_188	15426	15426	G	A	hom	30
upstream;downstream	gene_9314;gene_9316	e_gw1.188.2.1;estExt_Genemark1.C_1880006	scaffold_188	20167	20167	G	C	hom	30
upstream;downstream	gene_9314;gene_9316	e_gw1.188.2.1;estExt_Genemark1.C_1880006	scaffold_188	20170	20170	T	G	hom	30
upstream;downstream	gene_9314;gene_9316	e_gw1.188.2.1;estExt_Genemark1.C_1880006	scaffold_188	20176	20176	G	C	hom	30
intronic	gene_9317	e_gw1.188.24.1	scaffold_188	24172	24172	A	G	hom	30
exonic	gene_9319	gm1.7528_g	scaffold_188	29043	29043	C	T	hom	30
upstream;downstream	gene_9320;gene_9321	gm1.7529_g;gm1.7530_g	scaffold_188	32612	32612	A	G	hom	30
exonic	gene_9325	fgenesh1_kg.189_#_5_#_Locus8095v1rpkm2.61	scaffold_189	5093	5093	G	C	hom	30
exonic	gene_9325	fgenesh1_kg.189_#_5_#_Locus8095v1rpkm2.61	scaffold_189	5094	5094	A	C	hom	30
upstream	gene_2269	fgenesh1_kg.19_#_1_#_Locus14934v1rpkm0.42	scaffold_19	3526	3526	A	G	hom	30
upstream	gene_2269	fgenesh1_kg.19_#_1_#_Locus14934v1rpkm0.42	scaffold_19	3529	3529	A	G	hom	30
upstream	gene_2269	fgenesh1_kg.19_#_1_#_Locus14934v1rpkm0.42	scaffold_19	3541	3541	A	G	hom	30
upstream	gene_2271	fgenesh1_pm.19_#_1	scaffold_19	3879	3879	T	C	hom	30
intronic	gene_2271	fgenesh1_pm.19_#_1	scaffold_19	5092	5092	C	T	hom	30
exonic	gene_2271	fgenesh1_pm.19_#_1	scaffold_19	6649	6649	A	G	hom	30
intronic	gene_2273	e_gw1.19.242.1	scaffold_19	12356	12356	A	G	hom	30
UTR3	gene_2276	estExt_Genewise1Plus.C_190008	scaffold_19	17864	17864	G	A	hom	30
exonic	gene_2276	estExt_Genewise1Plus.C_190008	scaffold_19	18564	18564	G	A	hom	30
upstream;downstream	gene_2278;gene_2277	fgenesh1_kg.19_#_18_#_Locus2585v2rpkm9.73;fgenesh1_kg.19_#_17_#_Locus12809v2rpkm0.00_PRE	scaffold_19	20290	20290	C	A	hom	30
exonic	gene_2279	e_gw1.19.236.1	scaffold_19	22185	22185	C	T	hom	30
upstream	gene_2286	fgenesh1_pg.19_#_11	scaffold_19	38148	38148	T	A	hom	30
exonic	gene_2299	fgenesh1_kg.19_#_43_#_Locus3581v1rpkm26.77	scaffold_19	62092	62092	A	G	hom	30
exonic	gene_2300	gm1.1850_g	scaffold_19	63577	63577	G	C	hom	30
upstream	gene_2307	fgenesh1_pg.19_#_29	scaffold_19	81095	81095	A	G	hom	30
exonic	gene_2314	estExt_fgenesh1_pm.C_190027	scaffold_19	91689	91689	A	G	hom	30
UTR3	gene_2333	fgenesh1_kg.19_#_73_#_Locus1220v2rpkm13.01	scaffold_19	135527	135527	T	C	hom	30
exonic	gene_2336	e_gw1.19.198.1	scaffold_19	146388	146388	A	G	hom	30
exonic	gene_2357	fgenesh1_kg.19_#_110_#_Locus1041v1rpkm149.37	scaffold_19	195398	195398	C	A	hom	30
exonic	gene_2362	estExt_Genewise1.C_190189	scaffold_19	207837	207837	T	C	hom	30
intronic	gene_2364	fgenesh1_pm.19_#_69	scaffold_19	214341	214341	G	T	hom	30
intronic	gene_2364	fgenesh1_pm.19_#_69	scaffold_19	214347	214347	G	T	hom	30
UTR3	gene_2373,gene_2374	fgenesh1_kg.19_#_128_#_Locus506v1rpkm350.67,fgenesh1_kg.19_#_129_#_Locus506v3rpkm0.99_PRE	scaffold_19	234873	234873	G	A	hom	30
exonic	gene_9386	fgenesh1_kg.192_#_12_#_Locus5580v3rpkm1.07	scaffold_192	32272	32272	T	C	hom	30
exonic	gene_9390	estExt_fgenesh1_pm.C_1930003	scaffold_193	4526	4526	C	T	hom	30
intergenic	gene_9391(dist=3055),gene_9393(dist=2845)	estExt_fgenesh1_pm.C_1930004(dist=3055),gw1.193.29.1(dist=2845)	scaffold_193	9985	9985	C	T	hom	30
exonic	gene_9393	gw1.193.29.1	scaffold_193	12867	12867	A	G	hom	30
exonic	gene_9403	e_gw1.193.5.1	scaffold_193	30267	30267	A	G	hom	30
upstream;downstream	gene_9405;gene_9406,gene_9407	fgenesh1_kg.193_#_18_#_Locus1506v4rpkm0.00_PRE;CE140906_11385,CE141050_5037	scaffold_193	33227	33227	A	C	hom	30
upstream	gene_9424	fgenesh1_pm.195_#_1	scaffold_195	242	242	G	A	hom	30
exonic	gene_9431	gm1.7613_g	scaffold_195	20980	20980	A	G	hom	30
exonic	gene_9431	gm1.7613_g	scaffold_195	20989	20989	G	A	hom	30
upstream;downstream	gene_9432;gene_9433	e_gw1.195.20.1;e_gw1.195.8.1	scaffold_195	25714	25714	T	C	hom	30
intergenic	NONE(dist=NONE),gene_9437(dist=1224)	NONE(dist=NONE),gm1.7618_g(dist=1224)	scaffold_196	697	697	G	A	hom	30
exonic	gene_9437	gm1.7618_g	scaffold_196	6405	6405	G	A	hom	30
exonic	gene_9447	e_gw1.196.5.1	scaffold_196	24964	24964	C	A	hom	30
upstream;downstream	gene_9472;gene_9471	CE142652_704;gm1.7642_g	scaffold_198	6411	6411	G	A	hom	30
upstream	gene_9476	fgenesh1_pm.198_#_4	scaffold_198	17157	17157	G	A	hom	30
upstream	gene_9477	e_gw1.198.7.1	scaffold_198	17834	17834	T	C	hom	30
UTR5	gene_9480	fgenesh1_kg.198_#_13_#_Locus1044v2rpkm2.50_PRE	scaffold_198	24359	24359	T	C	hom	30
downstream	gene_9483	fgenesh1_kg.198_#_16_#_Locus1905v1rpkm69.43	scaffold_198	32316	32316	A	G	hom	30
exonic	gene_9495	e_gw1.199.28.1	scaffold_199	28986	28986	G	T	hom	30
exonic	gene_162	fgenesh1_pg.2_#_5	scaffold_2	8812	8812	C	T	hom	30
exonic	gene_162	fgenesh1_pg.2_#_5	scaffold_2	8813	8813	C	T	hom	30
upstream	gene_171	fgenesh1_kg.2_#_20_#_Locus8550v1rpkm2.25	scaffold_2	30514	30514	G	A	hom	30
downstream	gene_172	estExt_fgenesh1_pm.C_20008	scaffold_2	31775	31775	T	C	hom	30
exonic	gene_172	estExt_fgenesh1_pm.C_20008	scaffold_2	31785	31785	T	C	hom	30
exonic	gene_172	estExt_fgenesh1_pm.C_20008	scaffold_2	31792	31792	T	C	hom	30
exonic	gene_178	gm1.145_g	scaffold_2	44928	44928	C	A	hom	30
downstream	gene_184,gene_185	MIX7645_24382_34,fgenesh1_pg.2_#_26	scaffold_2	61136	61136	A	T	hom	30
exonic	gene_189	estExt_Genewise1Plus.C_20059	scaffold_2	83877	83877	T	A	hom	30
upstream	gene_197,gene_198	e_gw1.2.112.1,fgenesh1_kg.2_#_52_#_Locus5740v1rpkm8.44	scaffold_2	101876	101876	T	C	hom	30
UTR5	gene_199	fgenesh1_kg.2_#_54_#_Locus2312v1rpkm52.67	scaffold_2	107685	107685	A	G	hom	30
UTR5	gene_203	fgenesh1_kg.2_#_55_#_Locus5239v3rpkm2.44	scaffold_2	112592	112592	T	A	hom	30
upstream	gene_207	fgenesh1_pm.2_#_33	scaffold_2	125108	125108	C	T	hom	30
upstream	gene_207	fgenesh1_pm.2_#_33	scaffold_2	125154	125154	G	T	hom	30
upstream	gene_207	fgenesh1_pm.2_#_33	scaffold_2	125898	125898	G	A	hom	30
exonic	gene_228	fgenesh1_pg.2_#_62	scaffold_2	163027	163027	G	A	hom	30
downstream	gene_242	estExt_Genewise1Plus.C_20139	scaffold_2	197454	197454	A	G	hom	30
UTR3	gene_249	fgenesh1_kg.2_#_100_#_Locus820v2rpkm23.74	scaffold_2	215929	215929	G	A	hom	30
exonic	gene_254	e_gw1.2.229.1	scaffold_2	231483	231483	G	T	hom	30
upstream;downstream	gene_258;gene_257	CE147229_1253;fgenesh1_kg.2_#_111_#_Locus886v1rpkm181.12	scaffold_2	237537	237537	T	C	hom	30
upstream;downstream	gene_258;gene_257	CE147229_1253;fgenesh1_kg.2_#_111_#_Locus886v1rpkm181.12	scaffold_2	237996	237996	G	T	hom	30
upstream;downstream	gene_259;gene_258	fgenesh1_pm.2_#_62;CE147229_1253	scaffold_2	239684	239684	G	A	hom	30
exonic	gene_267	gm1.221_g	scaffold_2	257897	257897	G	A	hom	30
exonic	gene_274	estExt_Genewise1Plus.C_20185	scaffold_2	265793	265793	C	T	hom	30
intronic	gene_275	fgenesh1_kg.2_#_137_#_Locus5074v2rpkm5.66	scaffold_2	267778	267778	A	G	hom	30
intronic	gene_278	estExt_fgenesh1_pm.C_20068	scaffold_2	272767	272767	T	C	hom	30
upstream	gene_279,gene_280	estExt_Genemark1.C_20106,fgenesh1_kg.2_#_141_#_Locus3802v1rpkm24.12	scaffold_2	276527	276527	A	C	hom	30
exonic	gene_280	fgenesh1_kg.2_#_141_#_Locus3802v1rpkm24.12	scaffold_2	278060	278060	C	T	hom	30
exonic	gene_282	fgenesh1_pg.2_#_98	scaffold_2	284521	284521	A	C	hom	30
exonic	gene_282	fgenesh1_pg.2_#_98	scaffold_2	284536	284536	C	T	hom	30
exonic	gene_293	estExt_fgenesh1_pm.C_20073	scaffold_2	302968	302968	G	T	hom	30
exonic	gene_294	fgenesh1_kg.2_#_159_#_Locus1834v2rpkm1.64_PRE,gm1.243_g	scaffold_2	305926	305926	C	T	hom	30
upstream;downstream	gene_295;gene_296	fgenesh1_kg.2_#_159_#_Locus1834v2rpkm1.64_PRE;fgenesh1_kg.2_#_160_#_Locus7342v3rpkm0.75	scaffold_2	307749	307749	T	C	hom	30
upstream	gene_300	CE148261_309	scaffold_2	312151	312151	A	C	hom	30
upstream	gene_300	CE148261_309	scaffold_2	312179	312179	C	T	hom	30
exonic	gene_301	CE148512_6712	scaffold_2	313670	313670	T	C	hom	30
exonic	gene_301	CE148512_6712	scaffold_2	315528	315528	C	A	hom	30
intronic	gene_304	CE148599_20075	scaffold_2	322416	322416	T	C	hom	30
upstream	gene_309	CE148571_5741	scaffold_2	326864	326864	T	C	hom	30
intergenic	gene_309(dist=3156),gene_312(dist=3169)	CE148571_5741(dist=3156),fgenesh1_kg.2_#_179_#_Locus9888v1rpkm1.50(dist=3169)	scaffold_2	332403	332403	T	A	hom	30
intergenic	gene_309(dist=3400),gene_312(dist=2925)	CE148571_5741(dist=3400),fgenesh1_kg.2_#_179_#_Locus9888v1rpkm1.50(dist=2925)	scaffold_2	332647	332647	G	A	hom	30
intergenic	gene_309(dist=4124),gene_312(dist=2201)	CE148571_5741(dist=4124),fgenesh1_kg.2_#_179_#_Locus9888v1rpkm1.50(dist=2201)	scaffold_2	333371	333371	C	T	hom	30
exonic	gene_312	fgenesh1_kg.2_#_179_#_Locus9888v1rpkm1.50	scaffold_2	336542	336542	G	A	hom	30
exonic	gene_315	fgenesh1_pm.2_#_83	scaffold_2	344591	344591	C	A	hom	30
downstream	gene_315	fgenesh1_pm.2_#_83	scaffold_2	346169	346169	C	T	hom	30
exonic	gene_326	e_gw1.2.184.1	scaffold_2	365886	365886	T	C	hom	30
exonic	gene_326	e_gw1.2.184.1	scaffold_2	365890	365890	C	T	hom	30
exonic	gene_327	e_gw1.2.169.1	scaffold_2	369452	369452	G	A	hom	30
upstream	gene_2380	fgenesh1_pg.20_#_3	scaffold_20	7070	7070	G	A	hom	30
upstream	gene_2391,gene_2392	e_gw1.20.75.1,gw1.20.11.1	scaffold_20	29695	29695	A	T	hom	30
exonic	gene_2408	e_gw1.20.131.1	scaffold_20	68297	68297	A	G	hom	30
upstream	gene_2412,gene_2413	estExt_Genewise1.C_200056,estExt_fgenesh1_pg.C_200031	scaffold_20	79514	79514	C	A	hom	30
downstream	gene_2418	fgenesh1_kg.20_#_37_#_Locus251v2rpkm327.83	scaffold_20	94155	94155	A	T	hom	30
downstream	gene_2418	fgenesh1_kg.20_#_37_#_Locus251v2rpkm327.83	scaffold_20	94221	94221	T	C	hom	30
exonic	gene_2423	fgenesh1_kg.20_#_42_#_Locus1159v1rpkm132.52	scaffold_20	106885	106885	C	T	hom	30
intergenic	gene_2439(dist=2920),gene_2440(dist=3770)	CE151711_8743(dist=2920),estExt_fgenesh1_pg.C_200052(dist=3770)	scaffold_20	142336	142336	T	C	hom	30
intergenic	gene_2439(dist=5355),gene_2440(dist=1335)	CE151711_8743(dist=5355),estExt_fgenesh1_pg.C_200052(dist=1335)	scaffold_20	144771	144771	A	T	hom	30
intergenic	gene_2439(dist=5602),gene_2440(dist=1088)	CE151711_8743(dist=5602),estExt_fgenesh1_pg.C_200052(dist=1088)	scaffold_20	145018	145018	C	T	hom	30
exonic	gene_2449	fgenesh1_kg.20_#_71_#_Locus1024v2rpkm0.98_PRE	scaffold_20	167649	167649	T	G	hom	30
exonic	gene_2453	estExt_fgenesh1_pg.C_200061	scaffold_20	175691	175691	G	A	hom	30
downstream	gene_2455,gene_2456	e_gw1.20.48.1,fgenesh1_kg.20_#_78_#_Locus7345v1rpkm3.58	scaffold_20	184799	184799	T	A	hom	30
exonic	gene_2466	gm1.1991_g	scaffold_20	209837	209837	A	G	hom	30
UTR3	gene_2467	estExt_fgenesh1_pg.C_200074	scaffold_20	213498	213498	T	C	hom	30
exonic	gene_2469	CE152559_36224	scaffold_20	218474	218474	T	C	hom	30
upstream	gene_2469	CE152559_36224	scaffold_20	220240	220240	A	C	hom	30
exonic	gene_2471	estExt_fgenesh1_pm.C_200050	scaffold_20	223818	223818	C	T	hom	30
exonic	gene_9504	fgenesh1_pg.200_#_6	scaffold_200	13741	13741	A	G	hom	30
upstream;downstream	gene_9505;gene_9506	fgenesh1_pg.200_#_7;CE153354_17553	scaffold_200	18098	18098	G	A	hom	30
UTR5	gene_9510	fgenesh1_kg.200_#_19_#_Locus5231v1rpkm11.16	scaffold_200	29128	29128	T	C	hom	30
exonic	gene_9533	e_gw1.202.2.1	scaffold_202	14820	14820	T	C	hom	30
exonic	gene_9536	estExt_fgenesh1_pg.C_2020008	scaffold_202	20713	20713	C	T	hom	30
exonic	gene_9536	estExt_fgenesh1_pg.C_2020008	scaffold_202	22677	22677	C	T	hom	30
intronic	gene_9537	MIX8086_1_3	scaffold_202	25573	25573	G	A	hom	30
upstream;downstream	gene_9538;gene_9539	estExt_Genemark1.C_2030001;fgenesh1_pm.203_#_2	scaffold_203	4619	4619	T	C	hom	30
UTR5	gene_9541	fgenesh1_kg.203_#_3_#_Locus792v1rpkm209.47	scaffold_203	9062	9062	G	A	hom	30
exonic	gene_9542	fgenesh1_pg.203_#_5	scaffold_203	12652	12652	C	A	hom	30
exonic	gene_9544	estExt_Genewise1.C_2030019	scaffold_203	22544	22544	G	A	hom	30
exonic	gene_9556	fgenesh1_kg.205_#_1_#_Locus2217v1rpkm56.29	scaffold_205	6474	6474	C	T	hom	30
exonic	gene_9560	CE155461_1389	scaffold_205	14798	14798	T	C	hom	30
exonic	gene_9560	CE155461_1389	scaffold_205	14947	14947	T	C	hom	30
exonic	gene_9563	fgenesh1_kg.205_#_7_#_Locus4051v1rpkm21.29	scaffold_205	24170	24170	G	A	hom	30
intronic	gene_9591	fgenesh1_pm.208_#_4	scaffold_208	9771	9771	T	C	hom	30
intronic	gene_9591	fgenesh1_pm.208_#_4	scaffold_208	11866	11866	G	T	hom	30
intronic	gene_9591	fgenesh1_pm.208_#_4	scaffold_208	11870	11870	C	T	hom	30
intronic	gene_9591	fgenesh1_pm.208_#_4	scaffold_208	11878	11878	T	A	hom	30
exonic	gene_9594	estExt_Genewise1Plus.C_2080022	scaffold_208	19924	19924	G	A	hom	30
upstream	gene_2491,gene_2492	fgenesh1_kg.21_#_17_#_Locus6043v1rpkm7.21,fgenesh1_pg.21_#_15	scaffold_21	39659	39659	G	C	hom	30
downstream	gene_2502	estExt_Genemark1.C_210026	scaffold_21	70269	70269	A	G	hom	30
exonic	gene_2503	estExt_fgenesh1_pm.C_210019	scaffold_21	73016	73016	T	C	hom	30
intronic	gene_2511	estExt_Genemark1.C_210035	scaffold_21	94040	94040	G	A	hom	30
downstream	gene_2522	fgenesh1_pm.21_#_34	scaffold_21	119597	119597	G	T	hom	30
exonic	gene_2542	fgenesh1_kg.21_#_74_#_Locus4952v6rpkm0.00_PRE	scaffold_21	165347	165347	A	G	hom	30
exonic	gene_2554	gm1.2072_g	scaffold_21	189596	189596	G	A	hom	30
downstream	gene_2563	gm1.2080_g	scaffold_21	216756	216756	G	A	hom	30
upstream	gene_9609	fgenesh1_kg.210_#_1_#_Locus5313v1rpkm10.72	scaffold_210	323	323	G	T	hom	30
exonic	gene_9634	gm1.7777_g	scaffold_212	3209	3209	C	T	hom	30
upstream;downstream	gene_9638;gene_9639	gm1.7781_g;CE163673_19	scaffold_212	12544	12544	C	T	hom	30
upstream;downstream	gene_9638;gene_9639	gm1.7781_g;CE163673_19	scaffold_212	12563	12563	C	T	hom	30
upstream;downstream	gene_9638;gene_9639	gm1.7781_g;CE163673_19	scaffold_212	12568	12568	G	A	hom	30
upstream;downstream	gene_9638;gene_9639	gm1.7781_g;CE163673_19	scaffold_212	12572	12572	A	C	hom	30
upstream;downstream	gene_9638;gene_9639	gm1.7781_g;CE163673_19	scaffold_212	12573	12573	G	A	hom	30
intergenic	gene_9639(dist=1374),gene_9640(dist=4543)	CE163673_19(dist=1374),estExt_Genemark1.C_2120007(dist=4543)	scaffold_212	13779	13779	G	A	hom	30
intergenic	gene_9639(dist=1783),gene_9640(dist=4134)	CE163673_19(dist=1783),estExt_Genemark1.C_2120007(dist=4134)	scaffold_212	14188	14188	G	A	hom	30
intergenic	gene_9639(dist=1791),gene_9640(dist=4126)	CE163673_19(dist=1791),estExt_Genemark1.C_2120007(dist=4126)	scaffold_212	14196	14196	G	A	hom	30
intergenic	gene_9639(dist=3270),gene_9640(dist=2647)	CE163673_19(dist=3270),estExt_Genemark1.C_2120007(dist=2647)	scaffold_212	15675	15675	G	A	hom	30
intergenic	gene_9639(dist=3511),gene_9640(dist=2406)	CE163673_19(dist=3511),estExt_Genemark1.C_2120007(dist=2406)	scaffold_212	15916	15916	G	A	hom	30
intergenic	gene_9639(dist=3557),gene_9640(dist=2360)	CE163673_19(dist=3557),estExt_Genemark1.C_2120007(dist=2360)	scaffold_212	15962	15962	C	T	hom	30
intergenic	gene_9639(dist=3558),gene_9640(dist=2359)	CE163673_19(dist=3558),estExt_Genemark1.C_2120007(dist=2359)	scaffold_212	15963	15963	A	G	hom	30
intergenic	gene_9639(dist=3560),gene_9640(dist=2357)	CE163673_19(dist=3560),estExt_Genemark1.C_2120007(dist=2357)	scaffold_212	15965	15965	C	T	hom	30
intergenic	gene_9639(dist=3561),gene_9640(dist=2356)	CE163673_19(dist=3561),estExt_Genemark1.C_2120007(dist=2356)	scaffold_212	15966	15966	A	G	hom	30
intergenic	gene_9639(dist=3596),gene_9640(dist=2321)	CE163673_19(dist=3596),estExt_Genemark1.C_2120007(dist=2321)	scaffold_212	16001	16001	C	T	hom	30
intergenic	gene_9639(dist=4271),gene_9640(dist=1646)	CE163673_19(dist=4271),estExt_Genemark1.C_2120007(dist=1646)	scaffold_212	16676	16676	C	T	hom	30
downstream	gene_9640	estExt_Genemark1.C_2120007	scaffold_212	17494	17494	C	T	hom	30
downstream	gene_9640	estExt_Genemark1.C_2120007	scaffold_212	17556	17556	A	G	hom	30
downstream	gene_9640	estExt_Genemark1.C_2120007	scaffold_212	17567	17567	A	G	hom	30
intergenic	gene_9641(dist=1383),NONE(dist=NONE)	estExt_Genewise1Plus.C_2120019(dist=1383),NONE(dist=NONE)	scaffold_212	25813	25813	G	A	hom	30
upstream	gene_9645,gene_9646	fgenesh1_kg.213_#_4_#_Locus4165v1rpkm20.29,fgenesh1_kg.213_#_5_#_Locus2776v1rpkm40.37	scaffold_213	8246	8246	C	T	hom	30
exonic	gene_9646	fgenesh1_kg.213_#_5_#_Locus2776v1rpkm40.37	scaffold_213	8729	8729	G	T	hom	30
intergenic	gene_9646(dist=2942),gene_9648(dist=2442)	fgenesh1_kg.213_#_5_#_Locus2776v1rpkm40.37(dist=2942),e_gw1.213.18.1(dist=2442)	scaffold_213	16068	16068	C	T	hom	30
intergenic	gene_9646(dist=2952),gene_9648(dist=2432)	fgenesh1_kg.213_#_5_#_Locus2776v1rpkm40.37(dist=2952),e_gw1.213.18.1(dist=2432)	scaffold_213	16078	16078	C	T	hom	30
upstream	gene_9648	e_gw1.213.18.1	scaffold_213	18228	18228	G	T	hom	30
intronic	gene_9664	fgenesh1_kg.215_#_3_#_Locus1803v1rpkm74.72	scaffold_215	6191	6191	A	G	hom	30
downstream	gene_9666	fgenesh1_kg.215_#_6_#_Locus6523v1rpkm5.51	scaffold_215	11055	11055	T	C	hom	30
upstream;downstream	gene_9670;gene_9669,gene_9671	gw1.215.2.1;CE164489_2579,gw1.215.23.1	scaffold_215	17588	17588	T	C	hom	30
exonic	gene_9679	gm1.7811_g	scaffold_216	12314	12314	G	A	hom	30
UTR5	gene_9690	estExt_Genewise1Plus.C_2170008	scaffold_217	7886	7886	T	C	hom	30
intergenic	gene_9690(dist=1061),gene_9692(dist=1191)	estExt_Genewise1Plus.C_2170008(dist=1061),e_gw1.217.14.1(dist=1191)	scaffold_217	9753	9753	G	A	hom	30
UTR5	gene_9698	CE165527_4125	scaffold_218	953	953	C	T	hom	30
exonic	gene_9701	CE165883_27022	scaffold_218	9733	9733	A	T	hom	30
exonic	gene_9701	CE165883_27022	scaffold_218	11159	11159	A	G	hom	30
downstream	gene_9708	fgenesh1_kg.218_#_13_#_Locus1795v1rpkm75.26	scaffold_218	22761	22761	G	A	hom	30
intergenic	NONE(dist=NONE),NONE(dist=NONE)	NONE(dist=NONE),NONE(dist=NONE)	scaffold_219	4932	4932	T	C	hom	30
intergenic	NONE(dist=NONE),NONE(dist=NONE)	NONE(dist=NONE),NONE(dist=NONE)	scaffold_219	4940	4940	T	C	hom	30
intergenic	NONE(dist=NONE),NONE(dist=NONE)	NONE(dist=NONE),NONE(dist=NONE)	scaffold_219	5000	5000	C	T	hom	30
intergenic	NONE(dist=NONE),NONE(dist=NONE)	NONE(dist=NONE),NONE(dist=NONE)	scaffold_219	5007	5007	C	T	hom	30
intergenic	NONE(dist=NONE),NONE(dist=NONE)	NONE(dist=NONE),NONE(dist=NONE)	scaffold_219	7651	7651	T	G	hom	30
intergenic	NONE(dist=NONE),NONE(dist=NONE)	NONE(dist=NONE),NONE(dist=NONE)	scaffold_219	14872	14872	A	G	hom	30
intergenic	NONE(dist=NONE),NONE(dist=NONE)	NONE(dist=NONE),NONE(dist=NONE)	scaffold_219	22568	22568	A	G	hom	30
intergenic	NONE(dist=NONE),NONE(dist=NONE)	NONE(dist=NONE),NONE(dist=NONE)	scaffold_219	22589	22589	A	G	hom	30
intergenic	NONE(dist=NONE),NONE(dist=NONE)	NONE(dist=NONE),NONE(dist=NONE)	scaffold_219	22594	22594	A	G	hom	30
upstream	gene_2566,gene_2567	CE166173_21231,estExt_Genewise1Plus.C_220010	scaffold_22	12702	12702	A	G	hom	30
exonic	gene_2571	estExt_Genewise1Plus.C_220019	scaffold_22	23797	23797	C	A	hom	30
intronic	gene_2593	fgenesh1_pm.22_#_20	scaffold_22	61951	61951	T	C	hom	30
exonic	gene_2602	estExt_Genemark1.C_220036	scaffold_22	82489	82489	A	G	hom	30
UTR5	gene_2603	estExt_Genewise1Plus.C_220064	scaffold_22	83354	83354	G	T	hom	30
downstream	gene_2603,gene_2604	estExt_Genewise1Plus.C_220064,fgenesh1_pg.22_#_33	scaffold_22	85568	85568	G	T	hom	30
downstream	gene_2603,gene_2604	estExt_Genewise1Plus.C_220064,fgenesh1_pg.22_#_33	scaffold_22	85569	85569	C	T	hom	30
downstream	gene_2603,gene_2604	estExt_Genewise1Plus.C_220064,fgenesh1_pg.22_#_33	scaffold_22	85573	85573	T	G	hom	30
downstream	gene_2603,gene_2604	estExt_Genewise1Plus.C_220064,fgenesh1_pg.22_#_33	scaffold_22	85595	85595	C	G	hom	30
downstream	gene_2603,gene_2604	estExt_Genewise1Plus.C_220064,fgenesh1_pg.22_#_33	scaffold_22	85596	85596	T	G	hom	30
downstream	gene_2603,gene_2604	estExt_Genewise1Plus.C_220064,fgenesh1_pg.22_#_33	scaffold_22	85599	85599	C	T	hom	30
downstream	gene_2603,gene_2604	estExt_Genewise1Plus.C_220064,fgenesh1_pg.22_#_33	scaffold_22	85600	85600	C	T	hom	30
upstream	gene_2606	gm1.2120_g	scaffold_22	92336	92336	T	G	hom	30
exonic	gene_2611	e_gw1.22.138.1	scaffold_22	102803	102803	T	G	hom	30
exonic	gene_2630	e_gw1.22.1.1	scaffold_22	140846	140846	A	G	hom	30
UTR3	gene_2633	fgenesh1_kg.22_#_78_#_Locus5717v1rpkm8.54	scaffold_22	148738	148738	C	A	hom	30
exonic	gene_2633	fgenesh1_kg.22_#_78_#_Locus5717v1rpkm8.54	scaffold_22	149872	149872	C	A	hom	30
UTR3	gene_2636	fgenesh1_kg.22_#_81_#_Locus1661v1rpkm84.44	scaffold_22	158679	158679	A	G	hom	30
upstream;downstream	gene_2644;gene_2643	fgenesh1_kg.22_#_87_#_Locus13825v1rpkm0.58;estExt_fgenesh1_pg.C_220066	scaffold_22	179747	179747	G	A	hom	30
upstream	gene_2658	gm1.2165_g	scaffold_22	215781	215781	T	A	hom	30
exonic	gene_9709	e_gw1.220.20.1	scaffold_220	2290	2290	C	T	hom	30
intronic	gene_9712	e_gw1.220.8.1	scaffold_220	6617	6617	A	T	hom	30
intronic	gene_9712	e_gw1.220.8.1	scaffold_220	6618	6618	G	T	hom	30
exonic	gene_9713	estExt_fgenesh1_pm.C_2200003	scaffold_220	9218	9218	G	A	hom	30
intronic	gene_9713	estExt_fgenesh1_pm.C_2200003	scaffold_220	9394	9394	C	T	hom	30
upstream	gene_9723,gene_9724	CE169270_112,e_gw1.221.12.1	scaffold_221	7282	7282	G	C	hom	30
upstream	gene_9723,gene_9724	CE169270_112,e_gw1.221.12.1	scaffold_221	7291	7291	A	C	hom	30
exonic	gene_9726	gm1.7846_g	scaffold_221	9455	9455	G	A	hom	30
upstream	gene_9729,gene_9731	CE169452_160,fgenesh1_kg.221_#_11_#_Locus7826v4rpkm0.00_PRE	scaffold_221	18344	18344	T	G	hom	30
downstream	gene_9732	CE169488_2751	scaffold_222	958	958	T	G	hom	30
exonic	gene_9754	fgenesh1_kg.224_#_1_#_Locus3806v1rpkm24.05	scaffold_224	1852	1852	G	T	hom	30
upstream	gene_9757	fgenesh1_kg.224_#_3_#_Locus2599v1rpkm44.65	scaffold_224	5857	5857	G	A	hom	30
exonic	gene_9757	fgenesh1_kg.224_#_3_#_Locus2599v1rpkm44.65	scaffold_224	9484	9484	A	G	hom	30
downstream	gene_9757,gene_9758,gene_9759	CE170215_253,estExt_Genemark1.C_2240005,fgenesh1_kg.224_#_3_#_Locus2599v1rpkm44.65	scaffold_224	10417	10417	G	A	hom	30
intronic	gene_9777	fgenesh1_pg.226_#_5	scaffold_226	14590	14590	T	G	hom	30
exonic	gene_9785	estExt_fgenesh1_pg.C_2270005	scaffold_227	16330	16330	G	A	hom	30
exonic	gene_9788	gm1.7887_g	scaffold_228	2656	2656	T	A	hom	30
exonic	gene_9788	gm1.7887_g	scaffold_228	2657	2657	G	A	hom	30
exonic	gene_9790	fgenesh1_pm.228_#_2	scaffold_228	5272	5272	C	T	hom	30
intronic	gene_9798	gm1.7894_g	scaffold_229	3017	3017	A	G	hom	30
upstream;downstream	gene_2659;gene_2660	fgenesh1_kg.23_#_1_#_Locus2176v1rpkm57.60;estExt_Genewise1Plus.C_230004	scaffold_23	226	226	G	T	hom	30
exonic	gene_2665	fgenesh1_kg.23_#_9_#_Locus1245v1rpkm121.20	scaffold_23	10454	10454	C	T	hom	30
exonic	gene_2667	CE172164_469	scaffold_23	12015	12015	G	C	hom	30
exonic	gene_2667	CE172164_469	scaffold_23	12016	12016	C	G	hom	30
UTR5	gene_2667	CE172164_469	scaffold_23	12263	12263	A	T	hom	30
downstream	gene_2668	e_gw1.23.114.1	scaffold_23	17033	17033	T	G	hom	30
exonic	gene_2678	e_gw1.23.157.1	scaffold_23	40722	40722	C	T	hom	30
exonic	gene_2679	gm1.2179_g	scaffold_23	42808	42808	C	T	hom	30
intergenic	gene_2679(dist=1060),gene_2680(dist=3188)	gm1.2179_g(dist=1060),gm1.2180_g(dist=3188)	scaffold_23	44138	44138	T	C	hom	30
intergenic	gene_2679(dist=1080),gene_2680(dist=3168)	gm1.2179_g(dist=1080),gm1.2180_g(dist=3168)	scaffold_23	44158	44158	G	T	hom	30
intergenic	gene_2679(dist=1092),gene_2680(dist=3156)	gm1.2179_g(dist=1092),gm1.2180_g(dist=3156)	scaffold_23	44170	44170	A	G	hom	30
intergenic	gene_2679(dist=1094),gene_2680(dist=3154)	gm1.2179_g(dist=1094),gm1.2180_g(dist=3154)	scaffold_23	44172	44172	T	C	hom	30
intergenic	gene_2679(dist=1218),gene_2680(dist=3030)	gm1.2179_g(dist=1218),gm1.2180_g(dist=3030)	scaffold_23	44296	44296	A	T	hom	30
UTR3	gene_2695	estExt_fgenesh1_pg.C_230026	scaffold_23	81322	81322	T	C	hom	30
intergenic	gene_2697(dist=1383),gene_2700(dist=3792)	fgenesh1_kg.23_#_42_#_Locus2732v1rpkm41.16(dist=1383),fgenesh1_pm.23_#_24(dist=3792)	scaffold_23	86968	86968	T	C	hom	30
exonic	gene_2702	gm1.2199_g	scaffold_23	97753	97753	A	G	hom	30
exonic	gene_2707	estExt_Genewise1.C_230082	scaffold_23	106830	106830	G	A	hom	30
intronic	gene_2756	fgenesh1_kg.23_#_104_#_Locus691v1rpkm239.20	scaffold_23	205422	205422	C	T	hom	30
intronic	gene_2756	fgenesh1_kg.23_#_104_#_Locus691v1rpkm239.20	scaffold_23	205426	205426	C	A	hom	30
exonic	gene_2757	fgenesh1_kg.23_#_105_#_Locus914v1rpkm174.48	scaffold_23	206719	206719	T	C	hom	30
UTR3	gene_9809	fgenesh1_kg.231_#_3_#_Locus1264v2rpkm2.70_PRE	scaffold_231	983	983	G	T	hom	30
exonic	gene_9815	fgenesh1_pg.231_#_5	scaffold_231	11640	11640	G	A	hom	30
exonic	gene_9816	estExt_Genemark1.C_2310006	scaffold_231	16010	16010	G	T	hom	30
exonic	gene_9818	fgenesh1_kg.232_#_3_#_Locus5779v1rpkm8.31	scaffold_232	3462	3462	C	T	hom	30
downstream	gene_9818,gene_9819,gene_9820	CE177307_65,estExt_Genewise1.C_2320006,fgenesh1_kg.232_#_3_#_Locus5779v1rpkm8.31	scaffold_232	4938	4938	C	T	hom	30
exonic	gene_9821	fgenesh1_kg.232_#_5_#_Locus4407v1rpkm17.95	scaffold_232	8473	8473	T	C	hom	30
upstream	gene_9823	estExt_Genemark1.C_2320005	scaffold_232	13084	13084	G	A	hom	30
exonic	gene_9826	gm1.7917_g	scaffold_233	6357	6357	G	A	hom	30
downstream	gene_9833	CE177840_579	scaffold_234	3364	3364	G	A	hom	30
downstream	gene_9837	estExt_Genemark1.C_2340005	scaffold_234	15192	15192	A	C	hom	30
intergenic	NONE(dist=NONE),gene_9843(dist=6846)	NONE(dist=NONE),estExt_Genemark1.C_2360001(dist=6846)	scaffold_236	1762	1762	A	G	hom	30
intergenic	NONE(dist=NONE),gene_9843(dist=6389)	NONE(dist=NONE),estExt_Genemark1.C_2360001(dist=6389)	scaffold_236	2219	2219	A	C	hom	30
intergenic	NONE(dist=NONE),gene_9843(dist=2234)	NONE(dist=NONE),estExt_Genemark1.C_2360001(dist=2234)	scaffold_236	6374	6374	T	G	hom	30
exonic	gene_9845	gm1.7933_g	scaffold_237	261	261	G	A	hom	30
intronic	gene_9851	e_gw1.238.6.1	scaffold_238	7028	7028	G	A	hom	30
downstream	gene_2823	estExt_Genemark1.C_240046	scaffold_24	128193	128193	C	T	hom	30
intronic	gene_2827	estExt_fgenesh1_pg.C_240049	scaffold_24	140496	140496	C	A	hom	30
intronic	gene_2827	estExt_fgenesh1_pg.C_240049	scaffold_24	140500	140500	C	A	hom	30
intronic	gene_2842	fgenesh1_kg.24_#_71_#_Locus3602v1rpkm26.48	scaffold_24	171180	171180	A	C	hom	30
intronic	gene_2844	fgenesh1_pm.24_#_45	scaffold_24	177421	177421	C	A	hom	30
intronic	gene_2844	fgenesh1_pm.24_#_45	scaffold_24	177423	177423	T	A	hom	30
intronic	gene_2844	fgenesh1_pm.24_#_45	scaffold_24	177426	177426	G	A	hom	30
intronic	gene_2844	fgenesh1_pm.24_#_45	scaffold_24	177438	177438	C	A	hom	30
intronic	gene_2844	fgenesh1_pm.24_#_45	scaffold_24	177442	177442	T	A	hom	30
downstream	gene_2847	estExt_fgenesh1_pm.C_240048	scaffold_24	185916	185916	G	A	hom	30
intergenic	gene_2848(dist=2241),gene_2849(dist=2346)	fgenesh1_kg.24_#_80_#_Locus3738v1rpkm24.92(dist=2241),fgenesh1_pm.24_#_51(dist=2346)	scaffold_24	201575	201575	G	A	hom	30
upstream	gene_2849	fgenesh1_pm.24_#_51	scaffold_24	202940	202940	T	C	hom	30
exonic	gene_2849	fgenesh1_pm.24_#_51	scaffold_24	204500	204500	G	A	hom	30
exonic	gene_2849	fgenesh1_pm.24_#_51	scaffold_24	204506	204506	A	G	hom	30
exonic	gene_2849	fgenesh1_pm.24_#_51	scaffold_24	204509	204509	A	G	hom	30
exonic	gene_2849	fgenesh1_pm.24_#_51	scaffold_24	204514	204514	C	T	hom	30
exonic	gene_2849	fgenesh1_pm.24_#_51	scaffold_24	204515	204515	A	G	hom	30
exonic	gene_2849	fgenesh1_pm.24_#_51	scaffold_24	204535	204535	C	T	hom	30
splicing	gene_2849(mRNA_2849:exon3:c.521+2T>C)	fgenesh1_pm.24_#_51(fgenesh1_pm.24_#_51:exon3:c.521+2T>C)	scaffold_24	204545	204545	T	C	hom	30
intronic	gene_2849	fgenesh1_pm.24_#_51	scaffold_24	204553	204553	G	A	hom	30
intronic	gene_2849	fgenesh1_pm.24_#_51	scaffold_24	204556	204556	C	T	hom	30
intronic	gene_2849	fgenesh1_pm.24_#_51	scaffold_24	204559	204559	C	T	hom	30
intronic	gene_2849	fgenesh1_pm.24_#_51	scaffold_24	204561	204561	C	T	hom	30
intronic	gene_2849	fgenesh1_pm.24_#_51	scaffold_24	204562	204562	A	G	hom	30
intronic	gene_2849	fgenesh1_pm.24_#_51	scaffold_24	204565	204565	G	A	hom	30
intronic	gene_2849	fgenesh1_pm.24_#_51	scaffold_24	204572	204572	T	C	hom	30
intronic	gene_2849	fgenesh1_pm.24_#_51	scaffold_24	204574	204574	G	A	hom	30
intronic	gene_2849	fgenesh1_pm.24_#_51	scaffold_24	204587	204587	T	C	hom	30
intronic	gene_2849	fgenesh1_pm.24_#_51	scaffold_24	204588	204588	G	A	hom	30
intronic	gene_2849	fgenesh1_pm.24_#_51	scaffold_24	204599	204599	A	G	hom	30
intronic	gene_2849	fgenesh1_pm.24_#_51	scaffold_24	204607	204607	G	A	hom	30
intronic	gene_2849	fgenesh1_pm.24_#_51	scaffold_24	204615	204615	C	T	hom	30
intronic	gene_2849	fgenesh1_pm.24_#_51	scaffold_24	204624	204624	A	G	hom	30
intronic	gene_2849	fgenesh1_pm.24_#_51	scaffold_24	204646	204646	G	C	hom	30
intronic	gene_2849	fgenesh1_pm.24_#_51	scaffold_24	204648	204648	T	C	hom	30
intronic	gene_2849	fgenesh1_pm.24_#_51	scaffold_24	204650	204650	T	C	hom	30
intronic	gene_2849	fgenesh1_pm.24_#_51	scaffold_24	204651	204651	C	T	hom	30
intronic	gene_2849	fgenesh1_pm.24_#_51	scaffold_24	204652	204652	A	G	hom	30
intronic	gene_2849	fgenesh1_pm.24_#_51	scaffold_24	204654	204654	A	G	hom	30
exonic	gene_2849	fgenesh1_pm.24_#_51	scaffold_24	204668	204668	A	G	hom	30
exonic	gene_2849	fgenesh1_pm.24_#_51	scaffold_24	204673	204673	C	A	hom	30
exonic	gene_2849	fgenesh1_pm.24_#_51	scaffold_24	204690	204690	C	T	hom	30
exonic	gene_2849	fgenesh1_pm.24_#_51	scaffold_24	204704	204704	G	A	hom	30
exonic	gene_2849	fgenesh1_pm.24_#_51	scaffold_24	204715	204715	G	A	hom	30
exonic	gene_2849	fgenesh1_pm.24_#_51	scaffold_24	204727	204727	C	T	hom	30
exonic	gene_2849	fgenesh1_pm.24_#_51	scaffold_24	204741	204741	C	T	hom	30
exonic	gene_2849	fgenesh1_pm.24_#_51	scaffold_24	204754	204754	G	A	hom	30
exonic	gene_2849	fgenesh1_pm.24_#_51	scaffold_24	204757	204757	G	A	hom	30
exonic	gene_2849	fgenesh1_pm.24_#_51	scaffold_24	204760	204760	C	T	hom	30
exonic	gene_2849	fgenesh1_pm.24_#_51	scaffold_24	204766	204766	G	A	hom	30
exonic	gene_2849	fgenesh1_pm.24_#_51	scaffold_24	204779	204779	G	A	hom	30
exonic	gene_2849	fgenesh1_pm.24_#_51	scaffold_24	204794	204794	T	C	hom	30
exonic	gene_2849	fgenesh1_pm.24_#_51	scaffold_24	204795	204795	G	A	hom	30
exonic	gene_2849	fgenesh1_pm.24_#_51	scaffold_24	204808	204808	T	C	hom	30
exonic	gene_2849	fgenesh1_pm.24_#_51	scaffold_24	204809	204809	G	A	hom	30
exonic	gene_2849	fgenesh1_pm.24_#_51	scaffold_24	204826	204826	A	G	hom	30
exonic	gene_2849	fgenesh1_pm.24_#_51	scaffold_24	204832	204832	G	A	hom	30
exonic	gene_2849	fgenesh1_pm.24_#_51	scaffold_24	204835	204835	C	T	hom	30
exonic	gene_2849	fgenesh1_pm.24_#_51	scaffold_24	204836	204836	A	G	hom	30
exonic	gene_2849	fgenesh1_pm.24_#_51	scaffold_24	204840	204840	C	T	hom	30
exonic	gene_2849	fgenesh1_pm.24_#_51	scaffold_24	204841	204841	A	G	hom	30
exonic	gene_2849	fgenesh1_pm.24_#_51	scaffold_24	204867	204867	G	T	hom	30
exonic	gene_2849	fgenesh1_pm.24_#_51	scaffold_24	204891	204891	A	G	hom	30
exonic	gene_2849	fgenesh1_pm.24_#_51	scaffold_24	204894	204894	C	T	hom	30
exonic	gene_2849	fgenesh1_pm.24_#_51	scaffold_24	204900	204900	T	A	hom	30
exonic	gene_2849	fgenesh1_pm.24_#_51	scaffold_24	204924	204924	G	A	hom	30
exonic	gene_2849	fgenesh1_pm.24_#_51	scaffold_24	204937	204937	G	A	hom	30
exonic	gene_2849	fgenesh1_pm.24_#_51	scaffold_24	204940	204940	C	T	hom	30
exonic	gene_2849	fgenesh1_pm.24_#_51	scaffold_24	204941	204941	T	C	hom	30
splicing	gene_2849(mRNA_2849:exon4:c.797+1G>A)	fgenesh1_pm.24_#_51(fgenesh1_pm.24_#_51:exon4:c.797+1G>A)	scaffold_24	204942	204942	G	A	hom	30
intronic	gene_2849	fgenesh1_pm.24_#_51	scaffold_24	204955	204955	T	A	hom	30
exonic	gene_2849	fgenesh1_pm.24_#_51	scaffold_24	204974	204974	C	T	hom	30
exonic	gene_2849	fgenesh1_pm.24_#_51	scaffold_24	204975	204975	G	A	hom	30
exonic	gene_2849	fgenesh1_pm.24_#_51	scaffold_24	204976	204976	C	T	hom	30
exonic	gene_2849	fgenesh1_pm.24_#_51	scaffold_24	204995	204995	G	A	hom	30
exonic	gene_2849	fgenesh1_pm.24_#_51	scaffold_24	205003	205003	T	C	hom	30
exonic	gene_2849	fgenesh1_pm.24_#_51	scaffold_24	205004	205004	G	A	hom	30
exonic	gene_2849	fgenesh1_pm.24_#_51	scaffold_24	205006	205006	T	C	hom	30
exonic	gene_2849	fgenesh1_pm.24_#_51	scaffold_24	205008	205008	T	C	hom	30
exonic	gene_2849	fgenesh1_pm.24_#_51	scaffold_24	205009	205009	G	A	hom	30
exonic	gene_2849	fgenesh1_pm.24_#_51	scaffold_24	205020	205020	G	A	hom	30
exonic	gene_2849	fgenesh1_pm.24_#_51	scaffold_24	205027	205027	C	T	hom	30
exonic	gene_2849	fgenesh1_pm.24_#_51	scaffold_24	205047	205047	G	A	hom	30
exonic	gene_2849	fgenesh1_pm.24_#_51	scaffold_24	205053	205053	T	G	hom	30
exonic	gene_2849	fgenesh1_pm.24_#_51	scaffold_24	205055	205055	G	A	hom	30
exonic	gene_2849	fgenesh1_pm.24_#_51	scaffold_24	205060	205060	T	C	hom	30
exonic	gene_2849	fgenesh1_pm.24_#_51	scaffold_24	205061	205061	G	A	hom	30
exonic	gene_2849	fgenesh1_pm.24_#_51	scaffold_24	205075	205075	A	G	hom	30
exonic	gene_2849	fgenesh1_pm.24_#_51	scaffold_24	205079	205079	C	T	hom	30
exonic	gene_2849	fgenesh1_pm.24_#_51	scaffold_24	205095	205095	A	C	hom	30
exonic	gene_2849	fgenesh1_pm.24_#_51	scaffold_24	205110	205110	C	T	hom	30
exonic	gene_2849	fgenesh1_pm.24_#_51	scaffold_24	205111	205111	A	G	hom	30
exonic	gene_2849	fgenesh1_pm.24_#_51	scaffold_24	205112	205112	A	G	hom	30
exonic	gene_2849	fgenesh1_pm.24_#_51	scaffold_24	205122	205122	T	C	hom	30
exonic	gene_2849	fgenesh1_pm.24_#_51	scaffold_24	205136	205136	C	T	hom	30
exonic	gene_2849	fgenesh1_pm.24_#_51	scaffold_24	205140	205140	C	A	hom	30
exonic	gene_2849	fgenesh1_pm.24_#_51	scaffold_24	205141	205141	A	T	hom	30
exonic	gene_2849	fgenesh1_pm.24_#_51	scaffold_24	205156	205156	G	A	hom	30
exonic	gene_2849	fgenesh1_pm.24_#_51	scaffold_24	205162	205162	A	G	hom	30
exonic	gene_2849	fgenesh1_pm.24_#_51	scaffold_24	205172	205172	C	A	hom	30
exonic	gene_2849	fgenesh1_pm.24_#_51	scaffold_24	205195	205195	C	T	hom	30
exonic	gene_2849	fgenesh1_pm.24_#_51	scaffold_24	205196	205196	A	G	hom	30
exonic	gene_2849	fgenesh1_pm.24_#_51	scaffold_24	205201	205201	A	G	hom	30
exonic	gene_2849	fgenesh1_pm.24_#_51	scaffold_24	205206	205206	T	C	hom	30
exonic	gene_2849	fgenesh1_pm.24_#_51	scaffold_24	205207	205207	G	A	hom	30
exonic	gene_2849	fgenesh1_pm.24_#_51	scaffold_24	205220	205220	A	G	hom	30
exonic	gene_2849	fgenesh1_pm.24_#_51	scaffold_24	205223	205223	G	A	hom	30
exonic	gene_2849	fgenesh1_pm.24_#_51	scaffold_24	205224	205224	A	G	hom	30
exonic	gene_2849	fgenesh1_pm.24_#_51	scaffold_24	205228	205228	G	A	hom	30
exonic	gene_2849	fgenesh1_pm.24_#_51	scaffold_24	205232	205232	G	A	hom	30
exonic	gene_2849	fgenesh1_pm.24_#_51	scaffold_24	205235	205235	C	T	hom	30
downstream	gene_2849	fgenesh1_pm.24_#_51	scaffold_24	206013	206013	G	A	hom	30
upstream	gene_9862	estExt_Genewise1.C_2400011	scaffold_240	13070	13070	G	A	hom	30
upstream	gene_9866	estExt_Genemark1.C_2410003	scaffold_241	5835	5835	T	A	hom	30
upstream	gene_9866	estExt_Genemark1.C_2410003	scaffold_241	6221	6221	T	A	hom	30
intergenic	gene_9866(dist=1358),gene_9867(dist=1608)	estExt_Genemark1.C_2410003(dist=1358),fgenesh1_pg.241_#_4(dist=1608)	scaffold_241	6804	6804	A	T	hom	30
intergenic	gene_9866(dist=1364),gene_9867(dist=1602)	estExt_Genemark1.C_2410003(dist=1364),fgenesh1_pg.241_#_4(dist=1602)	scaffold_241	6810	6810	A	G	hom	30
upstream	gene_9867	fgenesh1_pg.241_#_4	scaffold_241	7727	7727	T	A	hom	30
upstream	gene_9867	fgenesh1_pg.241_#_4	scaffold_241	7728	7728	T	A	hom	30
exonic	gene_9868	e_gw1.241.17.1	scaffold_241	13303	13303	C	T	hom	30
downstream	gene_9868	e_gw1.241.17.1	scaffold_241	13562	13562	C	T	hom	30
downstream	gene_9870	estExt_Genewise1.C_2420006	scaffold_242	9406	9406	C	T	hom	30
intergenic	gene_9870(dist=1167),gene_9871(dist=1639)	estExt_Genewise1.C_2420006(dist=1167),fgenesh1_pg.242_#_4(dist=1639)	scaffold_242	9594	9594	A	G	hom	30
downstream	gene_9871	fgenesh1_pg.242_#_4	scaffold_242	10291	10291	G	A	hom	30
downstream	gene_9871	fgenesh1_pg.242_#_4	scaffold_242	10293	10293	G	A	hom	30
downstream	gene_9871	fgenesh1_pg.242_#_4	scaffold_242	10297	10297	T	C	hom	30
downstream	gene_9871	fgenesh1_pg.242_#_4	scaffold_242	10300	10300	C	T	hom	30
downstream	gene_9871	fgenesh1_pg.242_#_4	scaffold_242	10304	10304	T	A	hom	30
downstream	gene_9871	fgenesh1_pg.242_#_4	scaffold_242	10531	10531	G	A	hom	30
downstream	gene_9871	fgenesh1_pg.242_#_4	scaffold_242	10962	10962	G	A	hom	30
downstream	gene_9871	fgenesh1_pg.242_#_4	scaffold_242	10963	10963	A	G	hom	30
downstream	gene_9871	fgenesh1_pg.242_#_4	scaffold_242	11023	11023	A	G	hom	30
downstream	gene_9871	fgenesh1_pg.242_#_4	scaffold_242	11024	11024	G	A	hom	30
exonic	gene_9871	fgenesh1_pg.242_#_4	scaffold_242	11356	11356	A	G	hom	30
exonic	gene_9871	fgenesh1_pg.242_#_4	scaffold_242	11464	11464	C	T	hom	30
exonic	gene_9871	fgenesh1_pg.242_#_4	scaffold_242	11589	11589	C	T	hom	30
exonic	gene_9871	fgenesh1_pg.242_#_4	scaffold_242	11666	11666	G	A	hom	30
exonic	gene_9871	fgenesh1_pg.242_#_4	scaffold_242	11774	11774	C	T	hom	30
exonic	gene_9872	fgenesh1_pg.242_#_5	scaffold_242	12107	12107	A	G	hom	30
exonic	gene_9872	fgenesh1_pg.242_#_5	scaffold_242	12453	12453	C	T	hom	30
exonic	gene_9872	fgenesh1_pg.242_#_5	scaffold_242	12921	12921	A	G	hom	30
exonic	gene_9872	fgenesh1_pg.242_#_5	scaffold_242	12929	12929	C	T	hom	30
exonic	gene_9872	fgenesh1_pg.242_#_5	scaffold_242	12957	12957	C	T	hom	30
exonic	gene_9891	gm1.7973_g	scaffold_245	9549	9549	C	T	hom	30
upstream;downstream	gene_9893;gene_9894	fgenesh1_kg.246_#_1_#_Locus104v1rpkm1580.39;e_gw1.246.10.1	scaffold_246	2612	2612	C	A	hom	30
upstream;downstream	gene_9893;gene_9894	fgenesh1_kg.246_#_1_#_Locus104v1rpkm1580.39;e_gw1.246.10.1	scaffold_246	2617	2617	T	A	hom	30
upstream;downstream	gene_9893;gene_9894	fgenesh1_kg.246_#_1_#_Locus104v1rpkm1580.39;e_gw1.246.10.1	scaffold_246	2618	2618	T	A	hom	30
upstream;downstream	gene_9893;gene_9894	fgenesh1_kg.246_#_1_#_Locus104v1rpkm1580.39;e_gw1.246.10.1	scaffold_246	2619	2619	C	A	hom	30
upstream;downstream	gene_9893;gene_9894	fgenesh1_kg.246_#_1_#_Locus104v1rpkm1580.39;e_gw1.246.10.1	scaffold_246	2620	2620	G	A	hom	30
upstream;downstream	gene_9893;gene_9894	fgenesh1_kg.246_#_1_#_Locus104v1rpkm1580.39;e_gw1.246.10.1	scaffold_246	2622	2622	C	A	hom	30
upstream;downstream	gene_9893;gene_9894	fgenesh1_kg.246_#_1_#_Locus104v1rpkm1580.39;e_gw1.246.10.1	scaffold_246	2623	2623	T	A	hom	30
upstream;downstream	gene_9893;gene_9894	fgenesh1_kg.246_#_1_#_Locus104v1rpkm1580.39;e_gw1.246.10.1	scaffold_246	2625	2625	T	A	hom	30
upstream;downstream	gene_9893;gene_9894	fgenesh1_kg.246_#_1_#_Locus104v1rpkm1580.39;e_gw1.246.10.1	scaffold_246	2626	2626	C	A	hom	30
upstream;downstream	gene_9893;gene_9894	fgenesh1_kg.246_#_1_#_Locus104v1rpkm1580.39;e_gw1.246.10.1	scaffold_246	2627	2627	G	A	hom	30
exonic	gene_9894	e_gw1.246.10.1	scaffold_246	2629	2629	C	A	hom	30
exonic	gene_9894	e_gw1.246.10.1	scaffold_246	2630	2630	T	A	hom	30
exonic	gene_9894	e_gw1.246.10.1	scaffold_246	2632	2632	T	A	hom	30
exonic	gene_9894	e_gw1.246.10.1	scaffold_246	2633	2633	C	A	hom	30
exonic	gene_9894	e_gw1.246.10.1	scaffold_246	2634	2634	G	A	hom	30
exonic	gene_9896	fgenesh1_pm.247_#_1	scaffold_247	2888	2888	C	A	hom	30
upstream	gene_10016	e_gw1.248.1.1	scaffold_248	1665	1665	A	G	hom	30
upstream	gene_10016	e_gw1.248.1.1	scaffold_248	1713	1713	C	T	hom	30
downstream	gene_10016	e_gw1.248.1.1	scaffold_248	3241	3241	A	G	hom	30
downstream	gene_10016	e_gw1.248.1.1	scaffold_248	3255	3255	A	T	hom	30
downstream	gene_10016	e_gw1.248.1.1	scaffold_248	3256	3256	C	T	hom	30
downstream	gene_10016	e_gw1.248.1.1	scaffold_248	3261	3261	A	G	hom	30
downstream	gene_10016	e_gw1.248.1.1	scaffold_248	3285	3285	C	T	hom	30
downstream	gene_2860	gm1.2313_g	scaffold_25	29019	29019	G	A	hom	30
exonic	gene_2864	e_gw1.25.168.1	scaffold_25	37891	37891	G	A	hom	30
upstream;downstream	gene_2864;gene_2865	e_gw1.25.168.1;gm1.2318_g	scaffold_25	40472	40472	C	A	hom	30
upstream;downstream	gene_2864;gene_2865	e_gw1.25.168.1;gm1.2318_g	scaffold_25	40473	40473	C	A	hom	30
upstream;downstream	gene_2864;gene_2865	e_gw1.25.168.1;gm1.2318_g	scaffold_25	40495	40495	T	A	hom	30
exonic	gene_2868	estExt_fgenesh1_pm.C_250011	scaffold_25	46714	46714	T	G	hom	30
exonic	gene_2869	fgenesh1_kg.25_#_22_#_Locus9970v1rpkm1.47	scaffold_25	50968	50968	G	A	hom	30
exonic	gene_2873	fgenesh1_kg.25_#_26_#_Locus2918v1rpkm37.54	scaffold_25	58513	58513	C	G	hom	30
exonic	gene_2873	fgenesh1_kg.25_#_26_#_Locus2918v1rpkm37.54	scaffold_25	59747	59747	G	A	hom	30
downstream	gene_2873,gene_2874	fgenesh1_kg.25_#_26_#_Locus2918v1rpkm37.54,gm1.2326_g	scaffold_25	60985	60985	A	G	hom	30
intronic	gene_2880	fgenesh1_kg.25_#_37_#_Locus4433v1rpkm17.73	scaffold_25	77951	77951	A	G	hom	30
upstream;downstream	gene_2882;gene_2883	fgenesh1_kg.25_#_39_#_Locus6146v1rpkm6.86;fgenesh1_kg.25_#_40_#_Locus1196v1rpkm126.39	scaffold_25	86048	86048	G	C	hom	30
upstream;downstream	gene_2882;gene_2883	fgenesh1_kg.25_#_39_#_Locus6146v1rpkm6.86;fgenesh1_kg.25_#_40_#_Locus1196v1rpkm126.39	scaffold_25	86056	86056	T	A	hom	30
upstream;downstream	gene_2882;gene_2883	fgenesh1_kg.25_#_39_#_Locus6146v1rpkm6.86;fgenesh1_kg.25_#_40_#_Locus1196v1rpkm126.39	scaffold_25	86057	86057	C	A	hom	30
upstream;downstream	gene_2882;gene_2883	fgenesh1_kg.25_#_39_#_Locus6146v1rpkm6.86;fgenesh1_kg.25_#_40_#_Locus1196v1rpkm126.39	scaffold_25	86062	86062	C	A	hom	30
upstream;downstream	gene_2882;gene_2883	fgenesh1_kg.25_#_39_#_Locus6146v1rpkm6.86;fgenesh1_kg.25_#_40_#_Locus1196v1rpkm126.39	scaffold_25	86067	86067	C	A	hom	30
exonic	gene_2884	e_gw1.25.140.1	scaffold_25	91631	91631	T	C	hom	30
exonic	gene_2910	e_gw1.25.55.1	scaffold_25	143865	143865	T	C	hom	30
exonic	gene_2916	e_gw1.25.144.1	scaffold_25	155319	155319	A	C	hom	30
exonic	gene_2923	estExt_Genewise1Plus.C_250142	scaffold_25	168783	168783	A	T	hom	30
exonic	gene_2924	CE186008_184,estExt_Genewise1Plus.C_250142	scaffold_25	169615	169615	A	T	hom	30
UTR3	gene_2935	fgenesh1_kg.25_#_93_#_Locus4265v1rpkm19.23	scaffold_25	191162	191162	C	A	hom	30
exonic	gene_9908	gm1.7986_g	scaffold_250	4102	4102	G	A	hom	30
exonic	gene_9913	estExt_Genewise1.C_2510002	scaffold_251	1187	1187	A	G	hom	30
exonic	gene_9920	gm1.7995_g	scaffold_252	8855	8855	C	T	hom	30
intergenic	NONE(dist=NONE),gene_9942(dist=1164)	NONE(dist=NONE),fgenesh1_kg.257_#_1_#_Locus160v1rpkm1151.37(dist=1164)	scaffold_257	917	917	C	G	hom	30
exonic	gene_9942	fgenesh1_kg.257_#_1_#_Locus160v1rpkm1151.37	scaffold_257	2492	2492	G	A	hom	30
exonic	gene_9942	fgenesh1_kg.257_#_1_#_Locus160v1rpkm1151.37	scaffold_257	2493	2493	G	T	hom	30
exonic	gene_9942	fgenesh1_kg.257_#_1_#_Locus160v1rpkm1151.37	scaffold_257	2866	2866	C	T	hom	30
exonic	gene_9942	fgenesh1_kg.257_#_1_#_Locus160v1rpkm1151.37	scaffold_257	2923	2923	A	G	hom	30
intergenic	NONE(dist=NONE),gene_9945(dist=3005)	NONE(dist=NONE),e_gw1.258.7.1(dist=3005)	scaffold_258	2209	2209	C	A	hom	30
intergenic	NONE(dist=NONE),gene_9945(dist=1663)	NONE(dist=NONE),e_gw1.258.7.1(dist=1663)	scaffold_258	3551	3551	C	T	hom	30
upstream	gene_9945	e_gw1.258.7.1	scaffold_258	4561	4561	C	T	hom	30
upstream	gene_9945	e_gw1.258.7.1	scaffold_258	4674	4674	A	G	hom	30
upstream	gene_9945	e_gw1.258.7.1	scaffold_258	4679	4679	C	T	hom	30
upstream	gene_9945	e_gw1.258.7.1	scaffold_258	4680	4680	A	G	hom	30
upstream	gene_9945	e_gw1.258.7.1	scaffold_258	4709	4709	A	G	hom	30
intergenic	gene_9945(dist=2315),NONE(dist=NONE)	e_gw1.258.7.1(dist=2315),NONE(dist=NONE)	scaffold_258	8274	8274	C	T	hom	30
intergenic	gene_9945(dist=2974),NONE(dist=NONE)	e_gw1.258.7.1(dist=2974),NONE(dist=NONE)	scaffold_258	8933	8933	G	A	hom	30
intergenic	NONE(dist=NONE),gene_2946(dist=18841)	NONE(dist=NONE),fgenesh1_kg.26_#_1_#_Locus2006v1rpkm65.08(dist=18841)	scaffold_26	4664	4664	C	T	hom	30
intergenic	NONE(dist=NONE),gene_2946(dist=4992)	NONE(dist=NONE),fgenesh1_kg.26_#_1_#_Locus2006v1rpkm65.08(dist=4992)	scaffold_26	18513	18513	T	G	hom	30
intergenic	NONE(dist=NONE),gene_2946(dist=1621)	NONE(dist=NONE),fgenesh1_kg.26_#_1_#_Locus2006v1rpkm65.08(dist=1621)	scaffold_26	21884	21884	T	C	hom	30
exonic	gene_2952	estExt_Genewise1.C_260020	scaffold_26	37854	37854	G	T	hom	30
intronic	gene_2984	estExt_Genewise1Plus.C_260100	scaffold_26	130764	130764	A	T	hom	30
UTR3	gene_2984	estExt_Genewise1Plus.C_260100	scaffold_26	131554	131554	A	C	hom	30
upstream	gene_3008,gene_3009	fgenesh1_kg.26_#_78_#_Locus5823v2rpkm1.58,fgenesh1_kg.26_#_80_#_Locus5823v3rpkm0.77_PRE	scaffold_26	188513	188513	C	A	hom	30
intergenic	NONE(dist=NONE),NONE(dist=NONE)	NONE(dist=NONE),NONE(dist=NONE)	scaffold_262	7524	7524	A	C	hom	30
intergenic	NONE(dist=NONE),NONE(dist=NONE)	NONE(dist=NONE),NONE(dist=NONE)	scaffold_262	8229	8229	G	A	hom	30
UTR5	gene_9958	fgenesh1_kg.263_#_1_#_Locus3259v1rpkm31.51	scaffold_263	800	800	G	T	hom	30
exonic	gene_9958	fgenesh1_kg.263_#_1_#_Locus3259v1rpkm31.51	scaffold_263	2355	2355	T	C	hom	30
intergenic	NONE(dist=NONE),gene_9963(dist=1069)	NONE(dist=NONE),fgenesh1_kg.264_#_4_#_Locus5649v1rpkm8.92(dist=1069)	scaffold_264	44	44	T	C	hom	30
upstream	gene_9963	fgenesh1_kg.264_#_4_#_Locus5649v1rpkm8.92	scaffold_264	188	188	C	T	hom	30
upstream	gene_9963	fgenesh1_kg.264_#_4_#_Locus5649v1rpkm8.92	scaffold_264	189	189	A	G	hom	30
upstream	gene_9963	fgenesh1_kg.264_#_4_#_Locus5649v1rpkm8.92	scaffold_264	573	573	A	G	hom	30
upstream	gene_9963	fgenesh1_kg.264_#_4_#_Locus5649v1rpkm8.92	scaffold_264	632	632	A	G	hom	30
upstream	gene_9963	fgenesh1_kg.264_#_4_#_Locus5649v1rpkm8.92	scaffold_264	682	682	G	T	hom	30
upstream	gene_9963	fgenesh1_kg.264_#_4_#_Locus5649v1rpkm8.92	scaffold_264	735	735	A	G	hom	30
downstream	gene_9976	e_gw1.268.7.1	scaffold_268	2195	2195	C	T	hom	30
downstream	gene_9976	e_gw1.268.7.1	scaffold_268	2208	2208	A	G	hom	30
downstream	gene_9978	CE192874_160	scaffold_268	4012	4012	A	G	hom	30
downstream	gene_9978	CE192874_160	scaffold_268	4019	4019	A	G	hom	30
downstream	gene_9978	CE192874_160	scaffold_268	4034	4034	T	C	hom	30
downstream	gene_9981,gene_9982	estExt_Genemark1.C_2690001,fgenesh1_kg.269_#_2_#_Locus236v2rpkm8.98_PRE	scaffold_269	1236	1236	T	C	hom	30
UTR3	gene_3014	fgenesh1_kg.27_#_3_#_Locus5642v1rpkm8.94	scaffold_27	4255	4255	C	T	hom	30
UTR3	gene_3014	fgenesh1_kg.27_#_3_#_Locus5642v1rpkm8.94	scaffold_27	4257	4257	T	G	hom	30
intronic	gene_3025	MIX10404_2077_39	scaffold_27	25638	25638	G	T	hom	30
exonic	gene_3028	gm1.2453_g	scaffold_27	29688	29688	A	C	hom	30
intronic	gene_3034	fgenesh1_pm.27_#_13	scaffold_27	47133	47133	A	T	hom	30
exonic	gene_3041	estExt_fgenesh1_pm.C_270017	scaffold_27	56390	56390	T	G	hom	30
UTR5	gene_3048	fgenesh1_kg.27_#_42_#_Locus3467v1rpkm28.42	scaffold_27	62848	62848	C	T	hom	30
downstream	gene_3063	estExt_fgenesh1_pg.C_270031	scaffold_27	95009	95009	G	C	hom	30
exonic	gene_3075	CE195237_10530	scaffold_27	119137	119137	G	A	hom	30
exonic	gene_3105	e_gw1.27.121.1	scaffold_27	183469	183469	T	G	hom	30
exonic	gene_3106	fgenesh1_kg.27_#_97_#_Locus6304v1rpkm6.31	scaffold_27	186288	186288	C	T	hom	30
exonic	gene_3106	fgenesh1_kg.27_#_97_#_Locus6304v1rpkm6.31	scaffold_27	187146	187146	T	C	hom	30
exonic	gene_9987	fgenesh1_pm.270_#_1	scaffold_270	1877	1877	G	C	hom	30
upstream	gene_9993	estExt_Genemark1.C_2720001	scaffold_272	2261	2261	A	G	hom	30
upstream	gene_9993	estExt_Genemark1.C_2720001	scaffold_272	2475	2475	G	C	hom	30
intergenic	gene_9993(dist=5138),NONE(dist=NONE)	estExt_Genemark1.C_2720001(dist=5138),NONE(dist=NONE)	scaffold_272	6713	6713	C	T	hom	30
intergenic	gene_9993(dist=5144),NONE(dist=NONE)	estExt_Genemark1.C_2720001(dist=5144),NONE(dist=NONE)	scaffold_272	6719	6719	C	T	hom	30
intergenic	gene_9993(dist=5146),NONE(dist=NONE)	estExt_Genemark1.C_2720001(dist=5146),NONE(dist=NONE)	scaffold_272	6721	6721	A	T	hom	30
intergenic	gene_9993(dist=5156),NONE(dist=NONE)	estExt_Genemark1.C_2720001(dist=5156),NONE(dist=NONE)	scaffold_272	6731	6731	C	T	hom	30
intergenic	gene_9993(dist=5159),NONE(dist=NONE)	estExt_Genemark1.C_2720001(dist=5159),NONE(dist=NONE)	scaffold_272	6734	6734	C	T	hom	30
intergenic	NONE(dist=NONE),NONE(dist=NONE)	NONE(dist=NONE),NONE(dist=NONE)	scaffold_273	1081	1081	C	T	hom	30
intergenic	NONE(dist=NONE),NONE(dist=NONE)	NONE(dist=NONE),NONE(dist=NONE)	scaffold_273	1084	1084	C	T	hom	30
intergenic	NONE(dist=NONE),NONE(dist=NONE)	NONE(dist=NONE),NONE(dist=NONE)	scaffold_273	1098	1098	C	T	hom	30
intergenic	NONE(dist=NONE),NONE(dist=NONE)	NONE(dist=NONE),NONE(dist=NONE)	scaffold_273	1135	1135	C	T	hom	30
intergenic	NONE(dist=NONE),NONE(dist=NONE)	NONE(dist=NONE),NONE(dist=NONE)	scaffold_273	1137	1137	C	G	hom	30
intergenic	NONE(dist=NONE),NONE(dist=NONE)	NONE(dist=NONE),NONE(dist=NONE)	scaffold_273	1156	1156	A	G	hom	30
intergenic	NONE(dist=NONE),NONE(dist=NONE)	NONE(dist=NONE),NONE(dist=NONE)	scaffold_273	1273	1273	A	G	hom	30
intergenic	NONE(dist=NONE),NONE(dist=NONE)	NONE(dist=NONE),NONE(dist=NONE)	scaffold_273	1321	1321	A	G	hom	30
intergenic	NONE(dist=NONE),NONE(dist=NONE)	NONE(dist=NONE),NONE(dist=NONE)	scaffold_273	1459	1459	A	G	hom	30
intergenic	NONE(dist=NONE),NONE(dist=NONE)	NONE(dist=NONE),NONE(dist=NONE)	scaffold_273	1666	1666	A	G	hom	30
intergenic	NONE(dist=NONE),NONE(dist=NONE)	NONE(dist=NONE),NONE(dist=NONE)	scaffold_273	1793	1793	A	G	hom	30
intergenic	NONE(dist=NONE),NONE(dist=NONE)	NONE(dist=NONE),NONE(dist=NONE)	scaffold_273	1918	1918	A	G	hom	30
intergenic	NONE(dist=NONE),NONE(dist=NONE)	NONE(dist=NONE),NONE(dist=NONE)	scaffold_273	1920	1920	A	G	hom	30
intergenic	NONE(dist=NONE),NONE(dist=NONE)	NONE(dist=NONE),NONE(dist=NONE)	scaffold_273	1938	1938	A	G	hom	30
intergenic	NONE(dist=NONE),NONE(dist=NONE)	NONE(dist=NONE),NONE(dist=NONE)	scaffold_273	2022	2022	A	G	hom	30
intergenic	NONE(dist=NONE),NONE(dist=NONE)	NONE(dist=NONE),NONE(dist=NONE)	scaffold_273	2049	2049	A	G	hom	30
intergenic	NONE(dist=NONE),NONE(dist=NONE)	NONE(dist=NONE),NONE(dist=NONE)	scaffold_273	2104	2104	C	T	hom	30
intergenic	NONE(dist=NONE),NONE(dist=NONE)	NONE(dist=NONE),NONE(dist=NONE)	scaffold_273	2163	2163	A	G	hom	30
intergenic	NONE(dist=NONE),NONE(dist=NONE)	NONE(dist=NONE),NONE(dist=NONE)	scaffold_273	2280	2280	A	G	hom	30
intergenic	NONE(dist=NONE),NONE(dist=NONE)	NONE(dist=NONE),NONE(dist=NONE)	scaffold_273	2711	2711	G	T	hom	30
intergenic	NONE(dist=NONE),NONE(dist=NONE)	NONE(dist=NONE),NONE(dist=NONE)	scaffold_273	2726	2726	A	G	hom	30
intergenic	NONE(dist=NONE),NONE(dist=NONE)	NONE(dist=NONE),NONE(dist=NONE)	scaffold_273	2770	2770	T	C	hom	30
intergenic	NONE(dist=NONE),NONE(dist=NONE)	NONE(dist=NONE),NONE(dist=NONE)	scaffold_273	2776	2776	T	C	hom	30
intergenic	NONE(dist=NONE),NONE(dist=NONE)	NONE(dist=NONE),NONE(dist=NONE)	scaffold_273	2781	2781	A	G	hom	30
intergenic	NONE(dist=NONE),NONE(dist=NONE)	NONE(dist=NONE),NONE(dist=NONE)	scaffold_273	2784	2784	T	C	hom	30
intergenic	NONE(dist=NONE),NONE(dist=NONE)	NONE(dist=NONE),NONE(dist=NONE)	scaffold_273	2907	2907	T	C	hom	30
intergenic	NONE(dist=NONE),NONE(dist=NONE)	NONE(dist=NONE),NONE(dist=NONE)	scaffold_273	3372	3372	A	G	hom	30
intergenic	NONE(dist=NONE),NONE(dist=NONE)	NONE(dist=NONE),NONE(dist=NONE)	scaffold_273	3382	3382	A	G	hom	30
intergenic	NONE(dist=NONE),NONE(dist=NONE)	NONE(dist=NONE),NONE(dist=NONE)	scaffold_273	3386	3386	A	G	hom	30
intergenic	NONE(dist=NONE),NONE(dist=NONE)	NONE(dist=NONE),NONE(dist=NONE)	scaffold_273	3505	3505	A	G	hom	30
intergenic	NONE(dist=NONE),NONE(dist=NONE)	NONE(dist=NONE),NONE(dist=NONE)	scaffold_273	3550	3550	A	G	hom	30
intergenic	NONE(dist=NONE),NONE(dist=NONE)	NONE(dist=NONE),NONE(dist=NONE)	scaffold_273	3580	3580	C	G	hom	30
intergenic	NONE(dist=NONE),NONE(dist=NONE)	NONE(dist=NONE),NONE(dist=NONE)	scaffold_273	3622	3622	A	G	hom	30
intergenic	NONE(dist=NONE),NONE(dist=NONE)	NONE(dist=NONE),NONE(dist=NONE)	scaffold_273	3670	3670	A	G	hom	30
intergenic	NONE(dist=NONE),NONE(dist=NONE)	NONE(dist=NONE),NONE(dist=NONE)	scaffold_273	3691	3691	A	G	hom	30
intergenic	NONE(dist=NONE),NONE(dist=NONE)	NONE(dist=NONE),NONE(dist=NONE)	scaffold_273	3696	3696	A	G	hom	30
intergenic	NONE(dist=NONE),NONE(dist=NONE)	NONE(dist=NONE),NONE(dist=NONE)	scaffold_273	3725	3725	A	G	hom	30
intergenic	NONE(dist=NONE),NONE(dist=NONE)	NONE(dist=NONE),NONE(dist=NONE)	scaffold_273	3734	3734	A	G	hom	30
intergenic	NONE(dist=NONE),NONE(dist=NONE)	NONE(dist=NONE),NONE(dist=NONE)	scaffold_273	3752	3752	A	G	hom	30
intergenic	NONE(dist=NONE),NONE(dist=NONE)	NONE(dist=NONE),NONE(dist=NONE)	scaffold_273	3759	3759	A	G	hom	30
intergenic	NONE(dist=NONE),NONE(dist=NONE)	NONE(dist=NONE),NONE(dist=NONE)	scaffold_273	3826	3826	A	G	hom	30
intergenic	NONE(dist=NONE),NONE(dist=NONE)	NONE(dist=NONE),NONE(dist=NONE)	scaffold_273	3857	3857	A	G	hom	30
intergenic	NONE(dist=NONE),NONE(dist=NONE)	NONE(dist=NONE),NONE(dist=NONE)	scaffold_273	3920	3920	A	G	hom	30
intergenic	NONE(dist=NONE),NONE(dist=NONE)	NONE(dist=NONE),NONE(dist=NONE)	scaffold_273	3943	3943	A	G	hom	30
intergenic	NONE(dist=NONE),NONE(dist=NONE)	NONE(dist=NONE),NONE(dist=NONE)	scaffold_273	4032	4032	A	G	hom	30
intergenic	NONE(dist=NONE),NONE(dist=NONE)	NONE(dist=NONE),NONE(dist=NONE)	scaffold_273	4108	4108	T	C	hom	30
intergenic	NONE(dist=NONE),NONE(dist=NONE)	NONE(dist=NONE),NONE(dist=NONE)	scaffold_273	4109	4109	A	G	hom	30
intergenic	NONE(dist=NONE),NONE(dist=NONE)	NONE(dist=NONE),NONE(dist=NONE)	scaffold_273	4115	4115	A	G	hom	30
intergenic	NONE(dist=NONE),NONE(dist=NONE)	NONE(dist=NONE),NONE(dist=NONE)	scaffold_273	4133	4133	T	C	hom	30
intergenic	NONE(dist=NONE),NONE(dist=NONE)	NONE(dist=NONE),NONE(dist=NONE)	scaffold_273	4140	4140	T	C	hom	30
intergenic	NONE(dist=NONE),NONE(dist=NONE)	NONE(dist=NONE),NONE(dist=NONE)	scaffold_273	4750	4750	T	C	hom	30
intergenic	NONE(dist=NONE),NONE(dist=NONE)	NONE(dist=NONE),NONE(dist=NONE)	scaffold_273	4759	4759	A	G	hom	30
intergenic	NONE(dist=NONE),NONE(dist=NONE)	NONE(dist=NONE),NONE(dist=NONE)	scaffold_273	4767	4767	A	G	hom	30
intergenic	NONE(dist=NONE),NONE(dist=NONE)	NONE(dist=NONE),NONE(dist=NONE)	scaffold_273	4771	4771	T	C	hom	30
intergenic	NONE(dist=NONE),NONE(dist=NONE)	NONE(dist=NONE),NONE(dist=NONE)	scaffold_273	4772	4772	A	G	hom	30
intergenic	NONE(dist=NONE),NONE(dist=NONE)	NONE(dist=NONE),NONE(dist=NONE)	scaffold_273	4790	4790	A	G	hom	30
intergenic	NONE(dist=NONE),NONE(dist=NONE)	NONE(dist=NONE),NONE(dist=NONE)	scaffold_273	4801	4801	A	G	hom	30
exonic	gene_9994	fgenesh1_kg.274_#_1_#_Locus4420v2rpkm10.04	scaffold_274	2457	2457	A	G	hom	30
exonic	gene_9994	fgenesh1_kg.274_#_1_#_Locus4420v2rpkm10.04	scaffold_274	4499	4499	C	T	hom	30
upstream	gene_9994	fgenesh1_kg.274_#_1_#_Locus4420v2rpkm10.04	scaffold_274	5769	5769	C	G	hom	30
upstream	gene_9994	fgenesh1_kg.274_#_1_#_Locus4420v2rpkm10.04	scaffold_274	5778	5778	A	G	hom	30
upstream	gene_9995	estExt_fgenesh1_pg.C_2750001	scaffold_275	180	180	G	A	hom	30
exonic	gene_9996	e_gw1.275.2.1	scaffold_275	4674	4674	G	A	hom	30
intergenic	NONE(dist=NONE),gene_9997(dist=2293)	NONE(dist=NONE),fgenesh1_pm.276_#_1(dist=2293)	scaffold_276	411	411	A	G	hom	30
intergenic	NONE(dist=NONE),gene_9997(dist=2275)	NONE(dist=NONE),fgenesh1_pm.276_#_1(dist=2275)	scaffold_276	429	429	A	G	hom	30
intergenic	NONE(dist=NONE),gene_9997(dist=2217)	NONE(dist=NONE),fgenesh1_pm.276_#_1(dist=2217)	scaffold_276	487	487	A	G	hom	30
intergenic	NONE(dist=NONE),gene_9997(dist=2092)	NONE(dist=NONE),fgenesh1_pm.276_#_1(dist=2092)	scaffold_276	612	612	A	C	hom	30
intergenic	NONE(dist=NONE),gene_9997(dist=1413)	NONE(dist=NONE),fgenesh1_pm.276_#_1(dist=1413)	scaffold_276	1291	1291	T	C	hom	30
intergenic	NONE(dist=NONE),gene_9997(dist=1205)	NONE(dist=NONE),fgenesh1_pm.276_#_1(dist=1205)	scaffold_276	1499	1499	A	G	hom	30
intergenic	NONE(dist=NONE),gene_9997(dist=1001)	NONE(dist=NONE),fgenesh1_pm.276_#_1(dist=1001)	scaffold_276	1703	1703	A	G	hom	30
downstream	gene_9997	fgenesh1_pm.276_#_1	scaffold_276	4856	4856	C	T	hom	30
downstream	gene_9997	fgenesh1_pm.276_#_1	scaffold_276	4859	4859	C	T	hom	30
downstream	gene_9997	fgenesh1_pm.276_#_1	scaffold_276	4871	4871	G	T	hom	30
intergenic	gene_9997(dist=1720),NONE(dist=NONE)	fgenesh1_pm.276_#_1(dist=1720),NONE(dist=NONE)	scaffold_276	5643	5643	C	T	hom	30
intergenic	gene_10001(dist=2210),NONE(dist=NONE)	gm1.8064_g(dist=2210),NONE(dist=NONE)	scaffold_278	2918	2918	T	C	hom	30
intergenic	gene_10001(dist=2211),NONE(dist=NONE)	gm1.8064_g(dist=2211),NONE(dist=NONE)	scaffold_278	2919	2919	G	A	hom	30
intergenic	gene_10001(dist=2215),NONE(dist=NONE)	gm1.8064_g(dist=2215),NONE(dist=NONE)	scaffold_278	2923	2923	A	G	hom	30
intergenic	gene_10001(dist=2236),NONE(dist=NONE)	gm1.8064_g(dist=2236),NONE(dist=NONE)	scaffold_278	2944	2944	T	C	hom	30
intergenic	gene_10001(dist=2238),NONE(dist=NONE)	gm1.8064_g(dist=2238),NONE(dist=NONE)	scaffold_278	2946	2946	G	T	hom	30
intergenic	gene_10001(dist=2257),NONE(dist=NONE)	gm1.8064_g(dist=2257),NONE(dist=NONE)	scaffold_278	2965	2965	C	T	hom	30
intergenic	gene_10001(dist=2259),NONE(dist=NONE)	gm1.8064_g(dist=2259),NONE(dist=NONE)	scaffold_278	2967	2967	A	G	hom	30
intergenic	gene_10001(dist=2295),NONE(dist=NONE)	gm1.8064_g(dist=2295),NONE(dist=NONE)	scaffold_278	3003	3003	T	C	hom	30
intergenic	gene_10001(dist=2296),NONE(dist=NONE)	gm1.8064_g(dist=2296),NONE(dist=NONE)	scaffold_278	3004	3004	G	A	hom	30
intergenic	gene_10001(dist=2302),NONE(dist=NONE)	gm1.8064_g(dist=2302),NONE(dist=NONE)	scaffold_278	3010	3010	G	A	hom	30
intergenic	gene_10001(dist=2306),NONE(dist=NONE)	gm1.8064_g(dist=2306),NONE(dist=NONE)	scaffold_278	3014	3014	A	G	hom	30
intergenic	gene_10001(dist=2323),NONE(dist=NONE)	gm1.8064_g(dist=2323),NONE(dist=NONE)	scaffold_278	3031	3031	G	A	hom	30
intergenic	gene_10001(dist=2327),NONE(dist=NONE)	gm1.8064_g(dist=2327),NONE(dist=NONE)	scaffold_278	3035	3035	C	T	hom	30
intergenic	gene_10001(dist=2330),NONE(dist=NONE)	gm1.8064_g(dist=2330),NONE(dist=NONE)	scaffold_278	3038	3038	C	T	hom	30
intergenic	gene_10001(dist=2331),NONE(dist=NONE)	gm1.8064_g(dist=2331),NONE(dist=NONE)	scaffold_278	3039	3039	A	G	hom	30
intergenic	gene_10001(dist=2345),NONE(dist=NONE)	gm1.8064_g(dist=2345),NONE(dist=NONE)	scaffold_278	3053	3053	C	G	hom	30
intergenic	gene_10001(dist=2348),NONE(dist=NONE)	gm1.8064_g(dist=2348),NONE(dist=NONE)	scaffold_278	3056	3056	T	C	hom	30
intergenic	gene_10001(dist=2349),NONE(dist=NONE)	gm1.8064_g(dist=2349),NONE(dist=NONE)	scaffold_278	3057	3057	G	A	hom	30
intergenic	gene_10001(dist=2352),NONE(dist=NONE)	gm1.8064_g(dist=2352),NONE(dist=NONE)	scaffold_278	3060	3060	G	A	hom	30
intergenic	gene_10001(dist=2362),NONE(dist=NONE)	gm1.8064_g(dist=2362),NONE(dist=NONE)	scaffold_278	3070	3070	C	T	hom	30
intergenic	gene_10001(dist=2363),NONE(dist=NONE)	gm1.8064_g(dist=2363),NONE(dist=NONE)	scaffold_278	3071	3071	A	G	hom	30
intergenic	gene_10001(dist=2367),NONE(dist=NONE)	gm1.8064_g(dist=2367),NONE(dist=NONE)	scaffold_278	3075	3075	T	C	hom	30
intergenic	gene_10001(dist=2368),NONE(dist=NONE)	gm1.8064_g(dist=2368),NONE(dist=NONE)	scaffold_278	3076	3076	G	T	hom	30
intergenic	gene_10001(dist=2377),NONE(dist=NONE)	gm1.8064_g(dist=2377),NONE(dist=NONE)	scaffold_278	3085	3085	A	G	hom	30
intergenic	gene_10001(dist=2385),NONE(dist=NONE)	gm1.8064_g(dist=2385),NONE(dist=NONE)	scaffold_278	3093	3093	T	C	hom	30
intergenic	gene_10001(dist=2386),NONE(dist=NONE)	gm1.8064_g(dist=2386),NONE(dist=NONE)	scaffold_278	3094	3094	G	A	hom	30
intergenic	gene_10001(dist=2390),NONE(dist=NONE)	gm1.8064_g(dist=2390),NONE(dist=NONE)	scaffold_278	3098	3098	C	T	hom	30
intergenic	gene_10001(dist=2391),NONE(dist=NONE)	gm1.8064_g(dist=2391),NONE(dist=NONE)	scaffold_278	3099	3099	C	T	hom	30
intergenic	gene_10001(dist=2411),NONE(dist=NONE)	gm1.8064_g(dist=2411),NONE(dist=NONE)	scaffold_278	3119	3119	C	T	hom	30
intergenic	gene_10001(dist=2414),NONE(dist=NONE)	gm1.8064_g(dist=2414),NONE(dist=NONE)	scaffold_278	3122	3122	A	T	hom	30
intergenic	gene_10001(dist=2473),NONE(dist=NONE)	gm1.8064_g(dist=2473),NONE(dist=NONE)	scaffold_278	3181	3181	A	G	hom	30
intergenic	gene_10001(dist=2493),NONE(dist=NONE)	gm1.8064_g(dist=2493),NONE(dist=NONE)	scaffold_278	3201	3201	A	G	hom	30
intergenic	gene_10001(dist=2548),NONE(dist=NONE)	gm1.8064_g(dist=2548),NONE(dist=NONE)	scaffold_278	3256	3256	G	A	hom	30
intergenic	gene_10001(dist=2549),NONE(dist=NONE)	gm1.8064_g(dist=2549),NONE(dist=NONE)	scaffold_278	3257	3257	G	A	hom	30
intergenic	gene_10001(dist=2555),NONE(dist=NONE)	gm1.8064_g(dist=2555),NONE(dist=NONE)	scaffold_278	3263	3263	T	C	hom	30
intergenic	gene_10001(dist=2556),NONE(dist=NONE)	gm1.8064_g(dist=2556),NONE(dist=NONE)	scaffold_278	3264	3264	G	A	hom	30
intergenic	gene_10001(dist=2573),NONE(dist=NONE)	gm1.8064_g(dist=2573),NONE(dist=NONE)	scaffold_278	3281	3281	G	A	hom	30
intergenic	gene_10001(dist=2609),NONE(dist=NONE)	gm1.8064_g(dist=2609),NONE(dist=NONE)	scaffold_278	3317	3317	C	T	hom	30
intergenic	gene_10001(dist=2629),NONE(dist=NONE)	gm1.8064_g(dist=2629),NONE(dist=NONE)	scaffold_278	3337	3337	G	A	hom	30
intergenic	gene_10001(dist=2648),NONE(dist=NONE)	gm1.8064_g(dist=2648),NONE(dist=NONE)	scaffold_278	3356	3356	C	T	hom	30
intergenic	gene_10001(dist=2684),NONE(dist=NONE)	gm1.8064_g(dist=2684),NONE(dist=NONE)	scaffold_278	3392	3392	T	C	hom	30
intergenic	gene_10001(dist=2722),NONE(dist=NONE)	gm1.8064_g(dist=2722),NONE(dist=NONE)	scaffold_278	3430	3430	C	T	hom	30
intergenic	gene_10001(dist=2725),NONE(dist=NONE)	gm1.8064_g(dist=2725),NONE(dist=NONE)	scaffold_278	3433	3433	C	T	hom	30
intergenic	gene_10001(dist=2729),NONE(dist=NONE)	gm1.8064_g(dist=2729),NONE(dist=NONE)	scaffold_278	3437	3437	C	T	hom	30
intergenic	gene_10001(dist=2785),NONE(dist=NONE)	gm1.8064_g(dist=2785),NONE(dist=NONE)	scaffold_278	3493	3493	C	T	hom	30
intergenic	NONE(dist=NONE),gene_3107(dist=1823)	NONE(dist=NONE),fgenesh1_kg.28_#_3_#_Locus7778v1rpkm2.95(dist=1823)	scaffold_28	843	843	A	C	hom	30
intergenic	NONE(dist=NONE),gene_3107(dist=1672)	NONE(dist=NONE),fgenesh1_kg.28_#_3_#_Locus7778v1rpkm2.95(dist=1672)	scaffold_28	994	994	A	T	hom	30
intergenic	NONE(dist=NONE),gene_3107(dist=1627)	NONE(dist=NONE),fgenesh1_kg.28_#_3_#_Locus7778v1rpkm2.95(dist=1627)	scaffold_28	1039	1039	G	A	hom	30
intergenic	NONE(dist=NONE),gene_3107(dist=1624)	NONE(dist=NONE),fgenesh1_kg.28_#_3_#_Locus7778v1rpkm2.95(dist=1624)	scaffold_28	1042	1042	G	A	hom	30
intergenic	NONE(dist=NONE),gene_3107(dist=1623)	NONE(dist=NONE),fgenesh1_kg.28_#_3_#_Locus7778v1rpkm2.95(dist=1623)	scaffold_28	1043	1043	C	T	hom	30
intergenic	NONE(dist=NONE),gene_3107(dist=1500)	NONE(dist=NONE),fgenesh1_kg.28_#_3_#_Locus7778v1rpkm2.95(dist=1500)	scaffold_28	1166	1166	G	A	hom	30
upstream	gene_3107	fgenesh1_kg.28_#_3_#_Locus7778v1rpkm2.95	scaffold_28	2095	2095	G	A	hom	30
upstream	gene_3107	fgenesh1_kg.28_#_3_#_Locus7778v1rpkm2.95	scaffold_28	2111	2111	T	C	hom	30
upstream	gene_3107	fgenesh1_kg.28_#_3_#_Locus7778v1rpkm2.95	scaffold_28	2115	2115	C	T	hom	30
upstream	gene_3107	fgenesh1_kg.28_#_3_#_Locus7778v1rpkm2.95	scaffold_28	2119	2119	C	T	hom	30
exonic	gene_3113	fgenesh1_kg.28_#_9_#_Locus6729v2rpkm0.86	scaffold_28	12969	12969	T	C	hom	30
exonic	gene_3116	CE197642_130	scaffold_28	19557	19557	T	C	hom	30
downstream	gene_3118	e_gw1.28.62.1	scaffold_28	23193	23193	G	A	hom	30
exonic	gene_3122	estExt_Genewise1.C_280023	scaffold_28	30955	30955	A	G	hom	30
exonic	gene_3134	fgenesh1_kg.28_#_35_#_Locus5182v1rpkm11.46	scaffold_28	53303	53303	T	C	hom	30
exonic	gene_3144	estExt_Genewise1Plus.C_280065	scaffold_28	86870	86870	G	A	hom	30
intronic	gene_3149	gm1.2550_g	scaffold_28	99846	99846	C	T	hom	30
exonic	gene_3153	gm1.2554_g	scaffold_28	108605	108605	A	G	hom	30
exonic	gene_3158	fgenesh1_kg.28_#_59_#_Locus8799v2rpkm0.73	scaffold_28	116494	116494	T	C	hom	30
downstream	gene_3160	e_gw1.28.56.1	scaffold_28	118868	118868	A	G	hom	30
intronic	gene_10009	gm1.8073_g	scaffold_284	1262	1262	T	C	hom	30
exonic	gene_10009	gm1.8073_g	scaffold_284	1471	1471	C	G	hom	30
exonic	gene_10009	gm1.8073_g	scaffold_284	1482	1482	C	A	hom	30
exonic	gene_10009	gm1.8073_g	scaffold_284	1485	1485	A	G	hom	30
exonic	gene_10009	gm1.8073_g	scaffold_284	1493	1493	C	G	hom	30
exonic	gene_10009	gm1.8073_g	scaffold_284	1496	1496	C	A	hom	30
intronic	gene_10009	gm1.8073_g	scaffold_284	1511	1511	A	G	hom	30
intronic	gene_10009	gm1.8073_g	scaffold_284	1514	1514	A	C	hom	30
intronic	gene_10009	gm1.8073_g	scaffold_284	1515	1515	T	A	hom	30
intronic	gene_10009	gm1.8073_g	scaffold_284	1516	1516	G	A	hom	30
intronic	gene_10009	gm1.8073_g	scaffold_284	1518	1518	A	C	hom	30
intronic	gene_10009	gm1.8073_g	scaffold_284	1522	1522	G	A	hom	30
intronic	gene_10009	gm1.8073_g	scaffold_284	1525	1525	G	C	hom	30
intronic	gene_10009	gm1.8073_g	scaffold_284	1526	1526	C	T	hom	30
intronic	gene_10009	gm1.8073_g	scaffold_284	1527	1527	A	C	hom	30
intronic	gene_10009	gm1.8073_g	scaffold_284	1530	1530	A	C	hom	30
intronic	gene_10009	gm1.8073_g	scaffold_284	1532	1532	G	A	hom	30
intronic	gene_10009	gm1.8073_g	scaffold_284	1535	1535	C	T	hom	30
intronic	gene_10009	gm1.8073_g	scaffold_284	1541	1541	A	G	hom	30
intronic	gene_10009	gm1.8073_g	scaffold_284	1545	1545	A	C	hom	30
intronic	gene_10009	gm1.8073_g	scaffold_284	1547	1547	T	C	hom	30
exonic	gene_10009	gm1.8073_g	scaffold_284	1558	1558	G	A	hom	30
exonic	gene_10009	gm1.8073_g	scaffold_284	1575	1575	T	A	hom	30
exonic	gene_10009	gm1.8073_g	scaffold_284	1587	1587	G	A	hom	30
downstream	gene_10011	fgenesh1_kg.286_#_1_#_Locus7302v1rpkm3.64	scaffold_286	21	21	G	A	hom	30
intergenic	NONE(dist=NONE),NONE(dist=NONE)	NONE(dist=NONE),NONE(dist=NONE)	scaffold_287	51	51	C	T	hom	30
intronic	gene_3194	gm1.2586_g	scaffold_29	2006	2006	G	A	hom	30
exonic	gene_3196	e_gw1.29.64.1	scaffold_29	4738	4738	G	A	hom	30
downstream	gene_3196,gene_3197	e_gw1.29.64.1,gw1.29.19.1	scaffold_29	5815	5815	C	T	hom	30
upstream	gene_3199,gene_3200	e_gw1.29.122.1,gm1.2592_g	scaffold_29	12417	12417	T	C	hom	30
exonic	gene_3201	gw1.29.77.1	scaffold_29	13996	13996	G	A	hom	30
exonic	gene_3203	estExt_Genewise1Plus.C_290016	scaffold_29	28588	28588	G	A	hom	30
exonic	gene_3209	fgenesh1_kg.29_#_2_#_Locus7062v1rpkm4.11	scaffold_29	41478	41478	G	T	hom	30
exonic	gene_3209	fgenesh1_kg.29_#_2_#_Locus7062v1rpkm4.11	scaffold_29	41502	41502	G	A	hom	30
downstream	gene_3214	fgenesh1_kg.29_#_12_#_Locus5392v1rpkm10.24	scaffold_29	53809	53809	A	T	hom	30
exonic	gene_3222	gm1.2610_g	scaffold_29	73111	73111	T	C	hom	30
downstream	gene_3227	e_gw1.29.35.1	scaffold_29	87456	87456	G	A	hom	30
intergenic	gene_3230(dist=1102),gene_3231(dist=3056)	gm1.2617_g(dist=1102),CE201554_1850(dist=3056)	scaffold_29	104134	104134	A	T	hom	30
intergenic	gene_3233(dist=1116),gene_3237(dist=1083)	gm1.2620_g(dist=1116),fgenesh1_kg.29_#_29_#_Locus6575v1rpkm5.35(dist=1083)	scaffold_29	117195	117195	T	C	hom	30
downstream	gene_3236,gene_3237	fgenesh1_kg.29_#_29_#_Locus6575v1rpkm5.35,fgenesh1_kg.29_#_30_#_Locus6575v3rpkm1.04	scaffold_29	118249	118249	C	T	hom	30
exonic	gene_3246	fgenesh1_kg.29_#_41_#_Locus1369v1rpkm107.40	scaffold_29	141575	141575	G	A	hom	30
downstream	gene_3247	estExt_fgenesh1_pm.C_290025	scaffold_29	147810	147810	A	G	hom	30
intronic	gene_3251	estExt_fgenesh1_pm.C_290028	scaffold_29	156469	156469	T	C	hom	30
exonic	gene_3251	estExt_fgenesh1_pm.C_290028	scaffold_29	160409	160409	G	A	hom	30
exonic	gene_332	e_gw1.3.45.1	scaffold_3	3161	3161	G	T	hom	30
exonic	gene_332	e_gw1.3.45.1	scaffold_3	3234	3234	T	C	hom	30
upstream;downstream	gene_336;gene_337	estExt_Genewise1.C_30008;e_gw1.3.22.1	scaffold_3	15823	15823	A	T	hom	30
exonic	gene_362	estExt_Genewise1.C_30050	scaffold_3	77626	77626	G	A	hom	30
intergenic	gene_378(dist=4903),gene_379(dist=35856)	fgenesh1_kg.3_#_46_#_Locus1089v1rpkm141.98(dist=4903),e_gw1.3.62.1(dist=35856)	scaffold_3	116278	116278	T	G	hom	30
intergenic	gene_378(dist=11235),gene_379(dist=29524)	fgenesh1_kg.3_#_46_#_Locus1089v1rpkm141.98(dist=11235),e_gw1.3.62.1(dist=29524)	scaffold_3	122610	122610	A	G	hom	30
intergenic	gene_378(dist=17535),gene_379(dist=23224)	fgenesh1_kg.3_#_46_#_Locus1089v1rpkm141.98(dist=17535),e_gw1.3.62.1(dist=23224)	scaffold_3	128910	128910	A	T	hom	30
intergenic	gene_378(dist=24218),gene_379(dist=16541)	fgenesh1_kg.3_#_46_#_Locus1089v1rpkm141.98(dist=24218),e_gw1.3.62.1(dist=16541)	scaffold_3	135593	135593	A	G	hom	30
exonic	gene_409	MIX10990_27_70	scaffold_3	205420	205420	G	A	hom	30
intronic	gene_417	estExt_fgenesh1_pm.C_30051	scaffold_3	223722	223722	T	C	hom	30
exonic	gene_423	estExt_Genewise1Plus.C_30150	scaffold_3	230797	230797	C	T	hom	30
exonic	gene_428	gm1.337_g	scaffold_3	241318	241318	A	G	hom	30
exonic	gene_428	gm1.337_g	scaffold_3	243545	243545	G	A	hom	30
upstream;downstream	gene_435;gene_436	estExt_Genemark1.C_30082;estExt_fgenesh1_pg.C_30074	scaffold_3	259367	259367	G	C	hom	30
upstream;downstream	gene_435;gene_436	estExt_Genemark1.C_30082;estExt_fgenesh1_pg.C_30074	scaffold_3	259369	259369	G	C	hom	30
upstream;downstream	gene_435;gene_436	estExt_Genemark1.C_30082;estExt_fgenesh1_pg.C_30074	scaffold_3	259389	259389	A	C	hom	30
upstream;downstream	gene_452;gene_453	estExt_Genewise1.C_30190;fgenesh1_kg.3_#_115_#_Locus8275v1rpkm2.45	scaffold_3	289397	289397	G	T	hom	30
exonic	gene_466	gm1.368_g	scaffold_3	323813	323813	T	C	hom	30
upstream;downstream	gene_467;gene_469	e_gw1.3.196.1;fgenesh1_kg.3_#_140_#_Locus2916v1rpkm37.60	scaffold_3	326648	326648	T	A	hom	30
upstream;downstream	gene_467;gene_469	e_gw1.3.196.1;fgenesh1_kg.3_#_140_#_Locus2916v1rpkm37.60	scaffold_3	326649	326649	C	A	hom	30
upstream;downstream	gene_467;gene_469	e_gw1.3.196.1;fgenesh1_kg.3_#_140_#_Locus2916v1rpkm37.60	scaffold_3	326650	326650	G	A	hom	30
upstream;downstream	gene_467;gene_469	e_gw1.3.196.1;fgenesh1_kg.3_#_140_#_Locus2916v1rpkm37.60	scaffold_3	326652	326652	C	A	hom	30
upstream;downstream	gene_467;gene_469	e_gw1.3.196.1;fgenesh1_kg.3_#_140_#_Locus2916v1rpkm37.60	scaffold_3	326653	326653	G	A	hom	30
upstream;downstream	gene_467;gene_469	e_gw1.3.196.1;fgenesh1_kg.3_#_140_#_Locus2916v1rpkm37.60	scaffold_3	326654	326654	C	A	hom	30
upstream;downstream	gene_467;gene_469	e_gw1.3.196.1;fgenesh1_kg.3_#_140_#_Locus2916v1rpkm37.60	scaffold_3	326655	326655	C	A	hom	30
UTR3	gene_469	fgenesh1_kg.3_#_140_#_Locus2916v1rpkm37.60	scaffold_3	326707	326707	C	A	hom	30
UTR3	gene_469	fgenesh1_kg.3_#_140_#_Locus2916v1rpkm37.60	scaffold_3	326708	326708	G	A	hom	30
downstream	gene_483	fgenesh1_pg.3_#_106	scaffold_3	355218	355218	C	A	hom	30
downstream	gene_485	fgenesh1_kg.3_#_158_#_Locus4652v1rpkm15.48	scaffold_3	358526	358526	A	G	hom	30
downstream	gene_485	fgenesh1_kg.3_#_158_#_Locus4652v1rpkm15.48	scaffold_3	358527	358527	C	T	hom	30
upstream	gene_485	fgenesh1_kg.3_#_158_#_Locus4652v1rpkm15.48	scaffold_3	361066	361066	G	A	hom	30
intronic	gene_3264	gm1.2645_g	scaffold_30	4877	4877	A	G	hom	30
exonic	gene_3280	gm1.2660_g	scaffold_30	45398	45398	A	G	hom	30
UTR3	gene_3310	fgenesh1_kg.30_#_37_#_Locus7219v2rpkm0.65	scaffold_30	120967	120967	T	C	hom	30
exonic	gene_3315	fgenesh1_kg.30_#_45_#_Locus2311v1rpkm52.67	scaffold_30	129673	129673	C	T	hom	30
upstream	gene_3321,gene_3322	fgenesh1_kg.30_#_50_#_Locus14284v1rpkm0.51,fgenesh1_kg.30_#_51_#_Locus1875v1rpkm71.04	scaffold_30	145713	145713	G	C	hom	30
upstream;downstream	gene_3333;gene_3331	fgenesh1_kg.30_#_64_#_Locus3252v1rpkm31.61;e_gw1.30.21.1	scaffold_30	171277	171277	C	T	hom	30
exonic	gene_3333	fgenesh1_kg.30_#_64_#_Locus3252v1rpkm31.61	scaffold_30	176777	176777	C	A	hom	30
downstream	gene_3336	fgenesh1_kg.31_#_2_#_Locus2590v1rpkm44.80	scaffold_31	2680	2680	A	T	hom	30
exonic	gene_3340	estExt_Genewise1Plus.C_310008	scaffold_31	12637	12637	A	G	hom	30
exonic	gene_3340	estExt_Genewise1Plus.C_310008	scaffold_31	12638	12638	T	G	hom	30
exonic	gene_3341	estExt_fgenesh1_pg.C_310007	scaffold_31	17544	17544	C	T	hom	30
exonic	gene_3351	fgenesh1_pg.31_#_16	scaffold_31	41601	41601	C	A	hom	30
downstream	gene_3355,gene_3356	estExt_fgenesh1_pm.C_310014,fgenesh1_kg.31_#_22_#_Locus1569v1rpkm90.39	scaffold_31	52478	52478	C	A	hom	30
downstream	gene_3355,gene_3356	estExt_fgenesh1_pm.C_310014,fgenesh1_kg.31_#_22_#_Locus1569v1rpkm90.39	scaffold_31	52480	52480	C	A	hom	30
upstream;downstream	gene_3376;gene_3375	fgenesh1_kg.31_#_48_#_Locus10316v1rpkm1.36;gw1.31.185.1	scaffold_31	88447	88447	G	A	hom	30
UTR3	gene_3381	fgenesh1_kg.31_#_53_#_Locus4079v1rpkm21.04	scaffold_31	98467	98467	A	C	hom	30
exonic	gene_3396	fgenesh1_kg.31_#_68_#_Locus14647v1rpkm0.46	scaffold_31	123153	123153	G	A	hom	30
UTR5	gene_3403	fgenesh1_kg.31_#_76_#_Locus4386v1rpkm18.11	scaffold_31	142044	142044	C	G	hom	30
intergenic	gene_3439(dist=1131),gene_3440(dist=2276)	fgenesh1_pg.32_#_17(dist=1131),estExt_Genewise1Plus.C_320042(dist=2276)	scaffold_32	57711	57711	G	C	hom	30
intergenic	gene_3439(dist=1132),gene_3440(dist=2275)	fgenesh1_pg.32_#_17(dist=1132),estExt_Genewise1Plus.C_320042(dist=2275)	scaffold_32	57712	57712	G	T	hom	30
intergenic	gene_3439(dist=1135),gene_3440(dist=2272)	fgenesh1_pg.32_#_17(dist=1135),estExt_Genewise1Plus.C_320042(dist=2272)	scaffold_32	57715	57715	G	T	hom	30
intergenic	gene_3439(dist=1136),gene_3440(dist=2271)	fgenesh1_pg.32_#_17(dist=1136),estExt_Genewise1Plus.C_320042(dist=2271)	scaffold_32	57716	57716	A	G	hom	30
intergenic	gene_3439(dist=1137),gene_3440(dist=2270)	fgenesh1_pg.32_#_17(dist=1137),estExt_Genewise1Plus.C_320042(dist=2270)	scaffold_32	57717	57717	A	T	hom	30
intergenic	gene_3439(dist=1140),gene_3440(dist=2267)	fgenesh1_pg.32_#_17(dist=1140),estExt_Genewise1Plus.C_320042(dist=2267)	scaffold_32	57720	57720	G	T	hom	30
intergenic	gene_3439(dist=1209),gene_3440(dist=2198)	fgenesh1_pg.32_#_17(dist=1209),estExt_Genewise1Plus.C_320042(dist=2198)	scaffold_32	57789	57789	C	T	hom	30
intergenic	gene_3439(dist=1218),gene_3440(dist=2189)	fgenesh1_pg.32_#_17(dist=1218),estExt_Genewise1Plus.C_320042(dist=2189)	scaffold_32	57798	57798	C	T	hom	30
intergenic	gene_3439(dist=1224),gene_3440(dist=2183)	fgenesh1_pg.32_#_17(dist=1224),estExt_Genewise1Plus.C_320042(dist=2183)	scaffold_32	57804	57804	C	T	hom	30
intergenic	gene_3439(dist=1228),gene_3440(dist=2179)	fgenesh1_pg.32_#_17(dist=1228),estExt_Genewise1Plus.C_320042(dist=2179)	scaffold_32	57808	57808	C	T	hom	30
intergenic	gene_3439(dist=1269),gene_3440(dist=2138)	fgenesh1_pg.32_#_17(dist=1269),estExt_Genewise1Plus.C_320042(dist=2138)	scaffold_32	57849	57849	A	G	hom	30
intergenic	gene_3439(dist=1317),gene_3440(dist=2090)	fgenesh1_pg.32_#_17(dist=1317),estExt_Genewise1Plus.C_320042(dist=2090)	scaffold_32	57897	57897	C	T	hom	30
intergenic	gene_3439(dist=1347),gene_3440(dist=2060)	fgenesh1_pg.32_#_17(dist=1347),estExt_Genewise1Plus.C_320042(dist=2060)	scaffold_32	57927	57927	A	G	hom	30
intergenic	gene_3439(dist=1402),gene_3440(dist=2005)	fgenesh1_pg.32_#_17(dist=1402),estExt_Genewise1Plus.C_320042(dist=2005)	scaffold_32	57982	57982	T	C	hom	30
intergenic	gene_3439(dist=1972),gene_3440(dist=1435)	fgenesh1_pg.32_#_17(dist=1972),estExt_Genewise1Plus.C_320042(dist=1435)	scaffold_32	58552	58552	A	G	hom	30
upstream	gene_3443	e_gw1.32.147.1	scaffold_32	71200	71200	G	A	hom	30
upstream;downstream	gene_3456;gene_3457	estExt_Genemark1.C_320029;fgenesh1_kg.32_#_53_#_Locus3433v1rpkm28.90	scaffold_32	101399	101399	C	T	hom	30
upstream;downstream	gene_3456;gene_3457	estExt_Genemark1.C_320029;fgenesh1_kg.32_#_53_#_Locus3433v1rpkm28.90	scaffold_32	101400	101400	C	T	hom	30
upstream;downstream	gene_3456;gene_3457	estExt_Genemark1.C_320029;fgenesh1_kg.32_#_53_#_Locus3433v1rpkm28.90	scaffold_32	101401	101401	A	T	hom	30
upstream;downstream	gene_3456;gene_3457	estExt_Genemark1.C_320029;fgenesh1_kg.32_#_53_#_Locus3433v1rpkm28.90	scaffold_32	101402	101402	C	T	hom	30
upstream;downstream	gene_3456;gene_3457	estExt_Genemark1.C_320029;fgenesh1_kg.32_#_53_#_Locus3433v1rpkm28.90	scaffold_32	101405	101405	C	T	hom	30
upstream;downstream	gene_3456;gene_3457	estExt_Genemark1.C_320029;fgenesh1_kg.32_#_53_#_Locus3433v1rpkm28.90	scaffold_32	101418	101418	A	T	hom	30
upstream;downstream	gene_3456;gene_3457	estExt_Genemark1.C_320029;fgenesh1_kg.32_#_53_#_Locus3433v1rpkm28.90	scaffold_32	101419	101419	C	T	hom	30
upstream;downstream	gene_3456;gene_3457	estExt_Genemark1.C_320029;fgenesh1_kg.32_#_53_#_Locus3433v1rpkm28.90	scaffold_32	101420	101420	C	T	hom	30
upstream;downstream	gene_3456;gene_3457	estExt_Genemark1.C_320029;fgenesh1_kg.32_#_53_#_Locus3433v1rpkm28.90	scaffold_32	101421	101421	C	T	hom	30
upstream;downstream	gene_3456;gene_3457	estExt_Genemark1.C_320029;fgenesh1_kg.32_#_53_#_Locus3433v1rpkm28.90	scaffold_32	101424	101424	C	T	hom	30
upstream;downstream	gene_3456;gene_3457	estExt_Genemark1.C_320029;fgenesh1_kg.32_#_53_#_Locus3433v1rpkm28.90	scaffold_32	101430	101430	C	T	hom	30
upstream;downstream	gene_3456;gene_3457	estExt_Genemark1.C_320029;fgenesh1_kg.32_#_53_#_Locus3433v1rpkm28.90	scaffold_32	101433	101433	C	T	hom	30
upstream;downstream	gene_3456;gene_3457	estExt_Genemark1.C_320029;fgenesh1_kg.32_#_53_#_Locus3433v1rpkm28.90	scaffold_32	101435	101435	G	T	hom	30
upstream;downstream	gene_3456;gene_3457	estExt_Genemark1.C_320029;fgenesh1_kg.32_#_53_#_Locus3433v1rpkm28.90	scaffold_32	101436	101436	C	T	hom	30
intronic	gene_3469	gm1.2818_g	scaffold_32	130005	130005	G	A	hom	30
exonic	gene_3474	fgenesh1_pg.32_#_45	scaffold_32	141831	141831	C	T	hom	30
intergenic	NONE(dist=NONE),gene_3486(dist=1229)	NONE(dist=NONE),gm1.2833_g(dist=1229)	scaffold_33	472	472	A	T	hom	30
intergenic	gene_3525(dist=1502),gene_3526(dist=1289)	estExt_fgenesh1_pm.C_330019(dist=1502),estExt_Genewise1.C_330052(dist=1289)	scaffold_33	77044	77044	G	A	hom	30
intergenic	gene_3525(dist=1581),gene_3526(dist=1210)	estExt_fgenesh1_pm.C_330019(dist=1581),estExt_Genewise1.C_330052(dist=1210)	scaffold_33	77123	77123	A	G	hom	30
exonic	gene_3526	estExt_Genewise1.C_330052	scaffold_33	79776	79776	T	C	hom	30
exonic	gene_3528	fgenesh1_kg.33_#_38_#_Locus1289v1rpkm115.34	scaffold_33	84364	84364	G	A	hom	30
exonic	gene_3530	fgenesh1_kg.33_#_41_#_Locus3617v1rpkm26.28	scaffold_33	91985	91985	G	A	hom	30
exonic	gene_3542	estExt_Genewise1.C_330077	scaffold_33	112882	112882	G	A	hom	30
exonic	gene_3544	fgenesh1_pg.33_#_37	scaffold_33	117803	117803	G	A	hom	30
exonic	gene_3544	fgenesh1_pg.33_#_37	scaffold_33	118402	118402	G	C	hom	30
downstream	gene_3547	estExt_fgenesh1_pm.C_330032	scaffold_33	126168	126168	G	A	hom	30
exonic	gene_3553	fgenesh1_kg.33_#_70_#_Locus1019v3rpkm0.00_PRE	scaffold_33	135657	135657	A	G	hom	30
exonic	gene_3557	MIX11729_16473_87	scaffold_33	140364	140364	T	C	hom	30
exonic	gene_3561	gm1.2879_g	scaffold_33	147690	147690	G	T	hom	30
upstream	gene_3561,gene_3562	fgenesh1_kg.33_#_76_#_Locus434v1rpkm420.25,gm1.2879_g	scaffold_33	148264	148264	T	C	hom	30
upstream;downstream	gene_3567;gene_3568	estExt_fgenesh1_pm.C_330042;CE220003_134	scaffold_33	159943	159943	C	T	hom	30
exonic	gene_3569	estExt_Genewise1.C_330116	scaffold_33	162795	162795	A	C	hom	30
exonic	gene_3573	e_gw1.33.59.1	scaffold_33	173303	173303	C	T	hom	30
exonic	gene_3579	estExt_Genemark1.C_340005	scaffold_34	16145	16145	C	T	hom	30
exonic	gene_3590	estExt_Genewise1Plus.C_340030	scaffold_34	44694	44694	G	T	hom	30
intronic	gene_3605	estExt_Genewise1.C_340063	scaffold_34	81422	81422	G	T	hom	30
UTR3	gene_3606	fgenesh1_kg.34_#_28_#_Locus370v1rpkm489.20	scaffold_34	83586	83586	A	G	hom	30
exonic	gene_3608	fgenesh1_pg.34_#_31	scaffold_34	87588	87588	G	A	hom	30
UTR5	gene_3610	CE221206_7073	scaffold_34	89914	89914	C	T	hom	30
upstream	gene_3617	gm1.2930_g	scaffold_34	102060	102060	T	C	hom	30
exonic	gene_3622	CE221633_119069	scaffold_34	119900	119900	A	G	hom	30
[truncated: 1,138 more rows]

## Sheet: Table S7.
Table S7. Transcriptome based SNPs analysis.
[truncated: 12,722 more rows]

## Sheet: Table S8
Table S8. The profiles of RNA-seq reads mapped to the genome of Monascus purpureus and the differential expression analysis (strain M34 vs. strain M3). Differentially expressed genes are highlighted in green.
[truncated: 8,624 more rows]

[truncated: 2 more sheets: Table S9., Table S10.]
